# Supplementary material for: Interventions for social and community participation for adults with intellectual disability, psychosocial disability or on the autism spectrum: An umbrella systematic review
Source: Front Rehabil Sci. 2022 Aug 19;3:935473. doi: 10.3389/fresc.2022.935473 (PMC9397886; doi:10.3389/fresc.2022.935473)
Supplement: Supplementary Data 1 [file Table_1_v1.xlsx]

## Sheet: UR eligibility criteria
Note where we specify that data extraction is for "included studie that meet our eligibility criteria", the data extraction is specific to studies that meet the following review criteria:
Sample	>=50% 18 years or older and not participating in school setting; >=50% have ASD, ID or PD; living in community or small group homes
Phenomena of Interest	Aspects of SCC capacity or participation
Design, Evaluation and outcomes and Research Types	Systematic, scoping or rapid review, prospective within/between group design, cross-sectional between groups designs or case studies with multiple baseline. The information reported studies must provide sufficient relevant data for extraction and synthesis

## Sheet: SR characteristics
rin								DESIGN													STUDY SELECTION						POPULATION
								SEARCH STRATEGY				SEARCH YEARS			THEORETICAL FRAMEWORK/CONCEPTS		REVIEW DESIGN PRESENTATION										Pooled sample characteristics																			Continents/countries for included STUDIES eligible for our synthesis
Covidence ID	Endnote ID	First Author	Year	Publication title	Review type	Objective/purpose of review or key questions	Notes	Databases, Total N	List of databases [string]	Example keywords/ MeSH terms provided?	Actual search strategy provided? [Y/N]	Last search date	Start year	End year	Theory/key concept [Y/N]	Theory/key concept notes [string]	Review inclusion criteria [string]	Review exclusion criteria [string]	Type of review design structure used (e.g., PICO)	Details of PICO (or other) design elements missing or unclear [string]	PRISMA flow/screening numbers fully reported in figure or text	Reason for excluding FT articles reported in figure or text	Total studies included, N	Total papers included, N	Total studies eligible for our umbrella review, N	Selection notes	Pooled sample (ppl w disability), N	Males, Total N	Females, Total N	Age min (yrs)	Age max (yrs)	Age mean (SD) or notes if M(SD) missing	Demographic notes		ASD [Y/N/IE]	Autism diagnosis notes (e.g., high functioning) [string]	ID [Y/N/IE]	ID notes [string]	PD [Y/N/IE]	PD/ other MH condition details [string]	schizophrenia/ psychosis conditions [Y/N/NR/IE]	depression/ Bipolar Disorder [Y/N/NR/IE]	anxiety [Y/N/NR/IE]	PTSD/trauma [Y/N/NR/IE]	Other MH condition [Y/N/NR/IE]	Australia [no.]	UK/Ireland [no.]	UK countries [string]	Europe [no.]
	manual	Anderson	2015	Can mental health interventions change social networks? A systematic review.	Systematic Review	to determine the effectiveness of existing psychosocial interventions, tested through randomised controlled trials (RCTs), where the primary aim of the intervention was to improve the social networks of patients with psychosis.	...	6	PsycINFO, MEDLINE, CINAHL, Embase, Cochrane Library, grey literature, hand search of key journals	yes	in appendix/ supplementary materials	2014-12-12	inception	2014	No	n/a	O: primary outcome measure of social network size I/context: inpatient, outpatient or community mental health care services; ≥ 50 % participants with psychosis, and at least 18 years of age. C: Treatment as usual, active and waitlist control conditions were all accepted as comparators. S: written in English. D: RCTs	if only broader reference to social interactions was made, or social network size was a secondary outcome measure. Reviews were excluded but their reference lists were screened.	PICO	n/a	yes	Yes	5	5	5	n/a	633	436	197	nr	nr	44.2	n/a	1	no	n/a	no	n/a	yes	psychosis-related conditions only	yes	no	no	no	no	0	0	n/a	4
	13304	Atkinson-Jones	2019	Do group interventions help people with autism spectrum disorder to develop better relationships with others? A critical review of the literature	systematic review	1. Identify group social skills interventions for adults with ASD without intellectual disability and with a moderate or mild intellectual disability. 2. Summarise findings of the research. 3. Critically evaluate the methodologies used. 4. Consider clinical and research implications.	n/a	4	PsycINFO, MEDLINE, EMBASE and CINAHL	yes	in text only	Nov, 2017	nr	2017	yes	Importance of social communication and interaction impairments as a barrier to building relationships in ASD.	•Empirical research •Published in English peer‐reviewed journals •I: group social skills interventions •P: adults with ASD with mild intellectual disability, moderate intellectual disability and without intellectual disability.	Excluded if they: •Included participants under 18 (or did not specify age) •Included participants who did not have an ASD diagnosis • Did not involve group interventions • Included interventions where social skills training was not the main component	not clear	comparison eligibility NR, outcome eligibility NR	Yes	no	10	10	10	10 studies in PRISMA and in-text summary, 9 in tables (missing data extraction for Gantman 2012)	216	174	42	18	55	nr	n/a	2	yes	All had Aspergers, ASD, HF-ASD, or PDD-NOS [ASD + no ID: 8 studies; ASD w IQ ranging from 58-108: 2 studies]	yes	2 studies incl ppl w IQ<70	no	n/a	nr	nr	nr	nr	nr	0	2	UK	0
	8407	Bigby	2018	Identifying conceptualizations and theories of change embedded in interventions to facilitate community participation for people with intellectual disability: A scoping review	scoping review	three key questions: (i) “How do interventions designed to facilitate community participation for people with intellectual disability conceptualize their aims and community participation?” (ii) “What theory of change and facilitation strategies do interventions have?” and (iii) “How effective are interventions in achieving anticipated outcomes?”	n/a	4	CINAHL, PsycINFO, MEDLINE and PubMed;	yes	in text only	nr	2000	2015	yes	World Health Organization’s (2001) International Classification of Functioning (ICF) framework Verdonschot et al.’s (2009) definition of community participation: “the performance of people in actual activities in social life domains through interaction with others in the context in which they live” (p. 304) Dusseljee et al. (2011) define community participation as “performing daytime activities w…	•report of empirical research about the nature and effectiveness of a specific intervention (programme or practice) to facilitate community participation •the intervention aimed to facilitate community participation in line with Verdonschot et al.’s (2009) broad definition •The intervention was in respect of adults with intellectual disabilities •Written in English language •published in a peer-r…	None	not clear	comparison eligibility NR,	yes	yes	13	17	13	described in methods, p167-8	188	nr	nr	nr	nr	Two papers on one study for a dating program; four papers on one study in older people approaching transition to retirement	n/a	1	no	n/a	yes	ID severity nr (11 studies) ID sev moderate (1 study) ID sev mild (1 study)	no	n/a	nr	nr	nr	nr	nr	5	4	UK	1
	manual	Bigby	2012	Social inclusion and people with intellectual disability and challenging behaviour: A systematic review	Systematic Review	Aim: to systematically review the empirical literature on the social inclusion of people with intellectual disability and challenging behaviour. Two broad questions: (1) how has social inclusion by people with intellectual disability and challenging behaviour been researched and operationalised in the empirical literature, and (2) what is the evidence about the extent of social inclusion by peopl…	n/a	10	APAIS-Health, CINAHL, Cochrane Library, ERIC, Expanded Academic Index, MEDLINE, ProQuest Social Science and Humanities, PsychInfo, Social Services Abstracts, and Sociological Abstracts	Yes	not provided	mid 2010	inception	2010	yes	centrality of social inclusion in disability policy for UNCRPD. Distinction b/n community presence and community participation	D: reports of descriptive, qualitative or quantitative findings from empirical research P: people w ID and challenging behaviour I/O: commonly used components of social inclusion such as community activities, community participation, social interaction with family and friends, employment, community presence, or use of community facilities No C defined	none	not clear	No C defined	no	no	14	14	8	n/a	69	15	11	13	40	nr	3 studies did not report age, 2 did not report gender/sex	1	No	n/a	Yes	33/69 participants had moderate to profound ID, and severity not reported for 31 participants. Most had challenging behaviours	No	n/a	nr	nr	nr	nr	nr	nr	nr	n/a	nr
	21409	Bondár	2020	The effects of physical activity or sport‐based interventions on psychological factors in adults with intellectual disabilities: a systematic review	systematic review	The aims of the current review are (a) to obtain a better understanding of the effects of PA⁄sportbased interventions on intention, motivation and attitude in adults with id and (b) to investigate the influence of these psychological factors on behavioural change and QoL.	n/a	7	SCOPUS, Web of Science (all databases: KCI –Korean Journal Database, MEDLINE, Russian Science Citation Index, SciELO Citation Index), PubMed and Cochrane Library.	yes	in appendix/ supplementary materials	nr	nr	nr	yes	Physical Activity for people with a Disability (PAD) model (Van Der Ploeg et al. 2004) based on the International Classification of Functioning, Disability and Health and on the most frequently used theories concerning PA behaviour (e.g. transtheoretical model; social influence and self-efficacy model).	Published in a peer-reviewed journal English O: change in intention, motivation, attitude, psychosocial outcomes or QoL I: PA/sportbased interventions P: non-athlete adults aged between 18 and 60 years with a diagnosed ID. C: pre–post, quasi-experimental and experimental design (i.e. implementation of PA/sport-based intervention in at least one participantor one group of participants)	excluded older ppl - justified	not clear	not explicitly cited, but eligiblity criteria for each PICO domain detailed	yes	yes	12	13	8	4 studies did not measure SCC outcomes, or occur in social/group environment	419	nr	nr	15	65	min Q1=17; max Q3: 56	sex not reported for most studies	1	no	n/a	Yes	mild ID (2 studies), mild-mod (2 studies), incl sev (3 studies), nr (1 study)	No	n/a	nr	nr	nr	nr	nr	nr	nr	n/a	nr
	8425	Bourne	2018	A systematic review to investigate dramatherapy group work with working age adults who have a mental health problem	SR with meta-qual/ethnography	To identify the themes that emerge between the systematically collated studies so as to comprehend the group processes in dramatherapy, the benefits of this form of therapy as well as any challenges identified from the research.	n/a	6	CINAHL (Ebsco), EMBASE (Ovid), MEDLINE (Ovid), PsycINFO (Ovid), Cochrane, Open Grey	no	not provided	Mar, 2017	inception	2017	no	n/a	• P: age >18 and <65 • P/I: adults w MH problems attending dramatherapy group • I: led by dramatherapist • O: generic measure of MH, maintenance or change • D: qual, quant and mixed methods as long as they followed component of change • qual and mixed methods with more than one participant	• I: drama-based education • I: dramatherapy combined groups (e.g., including CBT) • studies "fatally flawed" based on CASP assessment	PICO	n/a	yes	yes	12	12	12	n/a	196	nr	nr	nr	nr	nr	n/a	2	no	n/a	yes	learning disability & MH (3 studies)	Yes	BPD (1 study), schizophrenia (2 studies), PTSD (1 study), heterogeneous (5 studies)	yes	nr	nr	yes	yes	1	8	UK X 8	1
	21604	Bundock	2017	A review of social skills interventions for adults with autism and intellectual disability	systematic review	To: identify empirical social skills interventions for adults with autism and ID (of all levels); summarise findings of the research; critically evaluate the methodologies used; discuss challenges of conducting such research; and consider practice, research and policy implications.	n/a	8	Psych Info, Embase, Medline, Amed, BNI, CINAHL, Health Business Elite and HMIC	yes	in text only	Nov, 2015	nr	2015	no	n/a	•adults with an ID (aged 17 years and over to include those transitioning between child and adult services);• participants with ASD (at least one participant had a diagnosis of ASD);• using an intervention to improve social skills (targeting positive and/or negative social behaviours); and • published in a peer reviewed journal and in English	nr	not clear	P, I and O defined, C not specified	yes	yes	5	5	5	n/a	46	32	8	17	~53	18.3 (1.25) to 39.7 (13.4)	sex missing for 6 participants	2	yes	ASD diagnosis (1 study, Samuels)	yes	mild-mod ID (1 study, Liu), mod-seve ID (1 study, Gaylor-Ross), sev ID + 1 participant w ASD (1 study, Nind), ID and PDD (1 study, Carminati)	no	n/a	N/A	N/A	N/A	N/A	N/A	NR	nr	n/a	NR
	898	Coren	2011	Parenting training for intellectually disabled parents: A Cochrane systematic review	Cochrane Review	To assess the effectiveness of parent training interventions for parents with intellectual disabilities to support parenting.	several details obtained from the Cochrane report as they weren't in the paper (e.g., search dates, search terms)	10	Cochrane Central Register of Controlled Trials (CENTRAL), MEDLINE, EMBASE,CINAHL, PsycINFO, ASSIA, Sociological Abstracts, Disser-tation Abstracts International, MetaRegister of ControlledTrials and ZETOC.	yes	in appendix/ supplementary materials	apr, 2019	inception	2009	no	n/a	• D: only RCTs and quasi-randomized studies; • C: compared parent training with usual care or with a controlgroup; •P participant group was parents or primarycaregivers with independent or shared care of one or more chil-dren aged 0 to 18 years, where the parent or caregiver has anintellectual disability; • I: Interventions were included that consisted of parent traininginterventions with any the…	nr	PICO	n/a	no	yes	3	3	3	n/a	107	5	102	nr	nr	24 to 32 (no sd reported)	sample size includes completers for Llewellyn	1	no	n/a	yes	"mentally retarded" (1 study), ID diagnosis or history of special education due to ID (1 study), IQ<85 (1 study)	no	n/a	N/A	N/A	N/A	N/A	N/A	1	0	n/a	0
		Coren	2010	Parent training support for intellectually disabled parents	Cochrane Review	Did not extract as all studies included in other Coren review
		Coren	2018	Parent training interventions for parents with intellectual disability	Cochrane Review	Did not extract as all studies included in other Coren review, and no new interventions identified
		Crowe	2010	Disorder-specific psychosocial interventions for bipolar disorder-A systematic review of the evidence for mental health nursing practice	Systematic Review	For people with bipolar disorder are disorder-specific psychosocial interventions as an adjunct to medication more effective than usual care in improving symptoms, relapse and functioning?	just extract information on "Interpersonal and social rhythm therapy"	3	CINAHL, MEDLINE, Psy_x0002_cINFO and manual searching	yes	in text only	nr	1990	2009	No	n/a	P: Participants 18 years + (and presumably had BPD?!). I: Psychosocial interventions specific to bipolar disorder. Interventions were adjunctive to pharmacotherapy. C: not defined O: patient outcomes using any measurement instrument. D: Experimental design. S: Published between 1990 and 2009.	n/a	not clear	no comparison defined, and didn't actually state that the population had to have BPD, just that the interventions were specific to BPD	No	No	29	38	2	only included 2 Interpersonal and social rhythm therapy studies reported in three papers	213	nr	nr	18	60	nr	nr	1	No	n/a	No	n/a	Yes	Bipolar Disorder: affective disorder/episode, acutely unwell.	No	Yes	No	No	No	0	0	n/a	0
	12031	Exell	2020	Interventions that support adults with brain injuries, learning disabilities and autistic spectrum disorders in dating or romantic relationships: a systematic review	systematic review	What interventions have been developed to support adults with ABI, learning disabilities, ASD to learn skills for engaging in dating or intimate relationships? What theoretical principles have been used to develop these interventions? What is the evidence for the effectiveness of these interventions?	Outcomes/effects not described in results for Chandler case study and Mueser, Velenti-Hein and Yarnold [52] trial	9	CINAHL, Communication Source, PsycARTICLES, PsycINFO, SocINDEX, MEDLINE, Embase, AMED and EMB Reviews (all).	Yes	in text only	01/05/2020	inception	2020	No	no driving theory for review, but did identify theory in primary studies	Studies (1) I: testing an intervention to support dating or intimate relationships; (2) published in a peer reviewed journal; (3) in English, with the full text available; (4) P: participants were 18 years or older; (5) P: participants were diagnosed with either ABI, learning disability, developmental disability, intellectual disability, neurodevelopmental disability, mental retardation, ASD or A…	None	not clear	P, I defined Registered with PROSPERO (CRD42019120222).	Yes	yes	11	13	5	Don't include the 6 studies (7 papers) in ABI samples	137	85	51	18	50	n/a	Gender of one participant missing	2	Yes	ASD (1 study)	Yes	LD/IDD severity not defined (2 studies), borderline-moderate intellectual functioning (1 study), mild-moderate mental retardation (1 study)	No	n/a	N/A	N/A	N/A	N/A	N/A	0	1	UK X1	0
	12018	Feng	2020	Morita therapy for schizophrenia: An updated meta-analysis	SR with meta-analysis	an updated meta-analysis to observe the clinical efficacy of Morita therapy for patients with schizophrenia since the previous review in 2007	n/a	10	Cochrane Library, PubMed, UpToDate, Web of Science, MEDLINE, PsycINFO, Embase, Chinese National Knowledge Infrastructure (CNKI), Wanfang, and SinoMed (CBM) databases	Yes	in appendix/ supplementary materials	2019-04-09	inception	2019	no	n/a	P: The target population consisted of adults (18 years or older) diagnosed with schizophrenia as per ICD10 or DSM-IV or Chinese Classification of Mental Disorders, Second Edition, Revised (CCMD-2R) and the Chinese Classification and Diagnostic Criteria of Mental Disorders, Third Edition (CCMD-3) I: Morita therapy plus pharmacotherapy (chlorpromazine, olanzapine, risperidone, venlafaxine, quetiapi…	epidemiologic (crosssectional, cohort or case-control) studies, case studies, case series and qualitative studies were excluded.	PICO	n/a	Yes	Yes	30	30	11	n/a	992	557	355	nr	nr	check meta-summary score?	sex not reported in one study of 80 participants	1	No	n/a	No	n/a	Yes	Schizophrenia	Yes	No	No	No	No	0	0	n/a	0
	10809	Fernandez-Sotos	2020	Virtual reality for psychosocial remediation in schizophrenia: A systematic review	systematic review	The aim of the present study is to conduct a systematic review of the interventions based on VR for psychosocial remediation in schizophrenia.	...	5	PubMed (American Psychological Association), Scopus (Elsevier), PsycINFO (American Psychological Association), IEEE Xplore (Institute of Electrical and Electronics Engineers) and ACM Digital Library (Association for Computing Machinery)	Yes	in text only	2019-01-07	2000	2019	no	n/a	I: based on VR O: the main purpose was the improvement of social cognition or social skills P: they included patients diagnosed with schizophrenia, according to DSM-IV-TR29, DSM-530 and ICD-1031 criteria D: written in English	Grey literature, unpublished dissertations, conference proceedings and abstracts without full texts available were excluded, systematic reviews, survey publications etc..	not clear	no C defined	Yes	no	7	7	6	Smith 2015 only measured job interview skills and employment outcomes, no Ax of general social skills	191	nr	nr	nr	nr	nr	SR did not report sex or age	2	Yes	one study included n=26 with ASD)	No	n/a	yes	6 studies w/ schizophrenia, one included an additional group w/ PTSD	Yes	No	No	Yes	No	NR	nr	n/a	NR
		Finkel	2020	The Open Studio Approach to Art Therapy: A Systematic Scoping Review	Scoping review	To map out and examine thescope of the open studio approach to art therapy as reflected inprofessional, clinical and research literature.	includes other populations in general synthesis, but possible to extract PD-specific study findings from Table 1	10	PUBMED; PsycINFO; Scopus;Cochrane; Cinahl; Eric; ProQuest Dissertations; World Cat; ULI;and Web of Science	yes	in text only	31/05/2019	inception	2019	Yes	Post-modern approaches to mentalhealth, such as the recovery approach (Anthony, 1993) and thewell-being theory (Seligman, 2011), which discard the medicalapproach and emphasize health and well-being.	P: wide range (different age groups, normative as well as clinical populations, and populations from different cultures). Context: wide range of settings Concept: open studio approach to art therapy, including studio approach even though they referenced models that did not define themselves as art therapy per se because of political or ideological reasons Research Type: quantitative, qualitative,…	findings that did not reference art therapy or the open studio approach.	PCC	not explicitly described as PCC, but meets criteria	yes	no	102	102	6	only studies with a therapeutic evaluation were tabulated. The included papers refer to this list, but the insights more broadly apply to the collated studies included	160	nr	nr	nr	nr	nr	n/a	1	no	n/a	no	n/a	yes	psychiatric disorder/patient or homeless	unclear	unclear	unclear	unclear	unclear	0	1	UK X1	0
	5296	Firth	2015	A systematic review and meta-analysis of exercise interventions in schizophrenia patients	systematic review	to provide a comprehensive summary of all exercise trials in schizophrenia, and to quantify effects on both physical and mental health. Physical outcomes include metabolic risk and physical fitness. Mental health outcomes include positive and negative symptoms, psychosocial functioning, co-morbid disorders and neurocognitive dysfunction	...	3	Ovid MEDLINE, Embase, PsycINFO and the Cochrane Central Register of Controlled Trials (CENTRAL)	Yes	in text only	2013-01-11	1994	2013	No	n/a	P: participants with any non-affective psychotic disorder, incl FEP S: original English-language, peer-reviewed research articles I: 'exercise' intervention is defined as any structured and repetitive physical activity that has an objective of improving or maintaining physical fitness O: effect of exercise on at least one quantitative measure of physical or mental health.	Interventions that only used yoga, muscular relaxation or adventure activities were excluded, since their effects are theoretically derived from factors distinct from exercise. Multi-modal programmes that incorporated exercise within a broader lifestyle or psychosocial intervention were also excluded, as the effects of exercise alone cannot be determined.	not clear	no C defined	Yes	Yes	17	20	11	studies not reporting psychosocial, overall mental illness or QoL outcomes not eligible (6 studies)	550	nr	nr	nr	nr	25-45	sex and age range not reported	1	No	n/a	No	n/a	Yes	psychosis-related conditions only	Yes	No	No	No	No	NR	nr	n/a	NR
	manual	Firth	2016	Motivating factors and barriers towards exercise in severe mental illness: a systematic review and meta-analysis.	Systematic Review	to understand motivating factors and barriers to exercise for people with SMI	...	6	Ovid Medline, Allied and Complementary Medicine Database (AMED), PsycINFO, EMBASE, and the Health Management Information Consortium (HMIC) database, Google Scholar	yes	in text only	may, 2016	nr	2016	No	n/a	P: >80% of sample had SMI diagnosis (i.e. schizophrenia, schizoaffective disorder, other psychotic disorders, bipolar disorder or major depressive disorder) and/or were currently receiving treatment for SMI. O: studies were those reporting proportional data on motivating factors and/or barriers towards physical activity among people with SMI, from questionnaires, surveys or other quantitative met…	Studies which used only qualitative methods were not eligible for inclusion, as these have been comprehensively reviewed elsewhere (Mason & Holt 2012; Soundy et al. 2014a)	not clear	consistent with PCC	Yes	Yes	12	12	12	n/a	6181	nr	nr	nr	nr	mean: 20-55	n/a	1	No	n/a	No	n/a	Yes	serious mental illness: schizophrenia, FEP, MDD, BP	Yes	Yes	No	No	yes	3	2	UKX2	1
	14779	Geretsegger	2017	Music therapy for people with schizophrenia and schizophrenia-like disorders	Cochrane Review	To review the effects of music therapy, or music therapy added to standard care, compared with placebo therapy, standard care or no treatment for people with serious mental disorders such as schizophrenia.	Not printed	9	AMED,BIOSIS, CINAHL, Embase, MEDLINE, PsycINFO, PubMed, and registries of clinical trials, monthly updates, handsearches, grey literature, and conference proceedings	Yes	in appendix/ supplementary materials	15/01/2015	nr	2015	yes	Music therapy models practised today are most commonly based on psychodynamic, humanistic, cognitive behavioural or developmental theory. music therapy for people with serious mental disorders oTen relies on a mixture of active and receptive techniques, even though musical improvisation and verbalisation of the musical interaction are often central.	P: people with schizophrenia or schizophrenia-like disorders, diagnosed by any criteria I: Music therapy or music therapy added to standard care C: placebo, standard care or no treatment O: Primary: Global state, mental state, functioning O: Secondary: global state (relapse, medication etc), mental state, specific aspects of functioning. D: RCTs	quasi experimental studies	PICO	n/a	yes	yes	18	18	18	n/a	1215	663	331	18	64	Mean age Min=24.9, max= 42.9	sex missing for some participants	1	No	n/a	No	n/a	Yes	schizophrenia	yes	No	No	No	No	nr	nr	n/a	nr
	8699	Gonzalvez	2018	Efficacy of sex education programs for people with intellectual disabilities: A meta-analysis	SR with meta-analysis	to evaluate the degree of efectiveness of sex education programs for people with intellectual disabilities and determine which moderating vari_x0002_ables are involved in this efectiveness. This general purpose is specifed in the following specifc aims: (a) to analyze the characteristics of sex education programs for people with intellectual disabilities; (b) to study the variability of the resul…	...	4	Web of Science (Science Cita_x0002_tion Index Expanded, Social Science Citation Index Expanded), Scopus, PsycINFO and ERIC	Yes	in text only	Oct, 2017	inception	2017	No	n/a	P: participants must be people with intellectual disabilities; I: program should develop contents on sexual education; C/D: the study should have a design with an experimental group and a control group and pretest–posttest measurements; O: actual eligible outcomes not specified in design, but the study had to provide enough data to calculate the effect sizes.	n/a	PICO	not explicitly using design structure	Yes	Yes	8	8	6	two studies in paeds; as it is a meta-analysis just include all data, though.	227	83	144	nr	nr	mean min: 21, max: 39	n/a	1	No	n/a	yes	mild ID (4 studies), mild or moderate ID (2 studies), mild, moderate or severe disability (1 study), not defined (1 study)	No	n/a	N/A	N/A	N/A	N/A	N/A	0	0	n/a	0
	manual	Grant	2017	Social cognition interventions for people with schizophrenia: A systematic review focussing on methodological quality and intervention modality	Systematic Review	to review the current status of social cognition interventions, with particular reference to the issues that will be instrumental in evaluating their efficacy: methodological quality and intervention type.	...	2	PsycInfo and PubMed database	Yes	in text only	May, 2016	nr	2016	No	n/a	P: aged 18 to 65 years w diagnosis of schizophrenia or schizoaffective disorder, according to the Diagnostic and Statistical Manual of Mental Disorder (Mendelson, 1995), Research Diagnostic Criteria (Spitzer, Endicott, & Robins, 1978) or International Classification of Diseases (Uribe, 1996) I: the intervention targeted one or more social cognition domains (theory of mind, affect recognition, att…	n/a	PICO	n/a	Yes	no	32	35	32	n/a	1440	950	490	nr	nr	nr	n/a	1	no	n/a	no	n/a	Yes	schizohrenia or schizoaffective disorder	yes	no	no	no	no	1	nr	n/a	18
	12989	Hallett	2019	Physical activity for autistic adults: Recommendations for a shift in approach	systematic review	To systematically review the gaps in the literature on exercise-based interventions for adults with ASD	...	27	Academic Search Complete, AMED, ASSIA, Biomed Central, BMJ Open, British Nursing Index, CINAHL, Clinical Evidence, Cochrane Library, DOAJ, Emerald Premier, EThOS, IngentaConnect, JSTOR, MEDLINE, NHS Evidence, Periodicals Archive Online, PsycARTICLES, PsycINFO, PubMed, Science Citation Index Expanded, ScienceDirect, Scopus, Social Sciences Citation Index, SPORTDiscus, TRIP, Web of Science	Yes	in appendix/ supplementary materials	Spring, 2018	nr	2018	No	n/a	P: ASD, Aspergers, PDD diagnosis or criteria met, aged 18+, mixed age groups included if majority aged 18+ or mean age 18+ I: exercise/physical activity, land or water-based, group or individual etc. C/D: random allocation or comparison group designs; qualitative evaluations that includes data from autistic individuals,	none	not clear	no O defined	Yes	No	6	6	3	3 studies did not incl SCC component/outcome	93	nr	nr	nr	nr	nr	n/a	2	Yes	severity/diagnosis not clear	Yes	one study included people with ID	No	n/a	N/A	N/A	N/A	N/A	N/A	nr	nr	n/a	nr
	6522	Howarth	2016	Health and social care interventions which promote social participation for adults with learning disabilities: A review	systematic review	identify and appraise evidence of health and social care interventions that aim to support people with learning disabilities to develop and enhance their social networks and participation	...	23	included Medline, CINAHL, PsycINFO, Bild, ERIC, The Cochrane Library, Social Science Citation Index and Social Care Online	Yes	in appendix/ supplementary materials	Apr, 2014	inception	2014	Yes	social inclusion and social capital theories: people w/ LD as citizens who are able to make a contribution to the whole community.	P: adults w LD aged 18-64 years I: interventions that aim to impprove social participation O: social participation outcomes D: english, no restrictions on design to maximise inclusion	The intervention measured community or society level changes only; P: The sample predominantly comprised people under the age of 18	PICO	no C defined (although stated all study designs eligible)	Yes	yes	11	11	8	Bigby 2008, Chou 2011, Duvdevany 2004 focused on residential change	417	nr	nr	nr	nr	nr	sample size not reported for four studies; age/sex not reported	1	unclear	not reported, but possible	Yes	severity not reported	no	n/a	n/a	n/a	n/a	n/a	n/a	1	4	England X 2, UK X 1, Wales X 1,	2
	5441	Hutchinson	2015	The effectiveness of intensive interaction, a systematic literature review	systematic review	What are the effects of using Intensive Interaction with a person with an intellectual disability or autism on social communication, self-injurious behaviour and repetitive behaviour? Are these effects influenced by the training of practitioners or staff experience?	...	5	CINAHL, PsychInfo, Medline, ERIC and Web of Science	Yes	in text only	Aug, 2013	nr	2013	Yes	‘Dual Aspect Process Model’, Firth states that processes seen are evident at two different time points of using the approach, one to support communication skills and the second to support social engagement and inclusion.	P: any age, ID or ASD I: using intensive interaction as an intervention C: not defined O: examining effects on outcomes (not defined) S: in peer-reviewed journal or in process of submission for publication, written in English	literature reviews and non-empirical papers	not clear	no C or specific Os defined	yes	no	16	18	8	most excluded due to paediatric samples, and some did not measure SCC impacts	27	10	11	late teens	early 60s	nr	gender not reported for six participants; age not reported clearly in all studies	2	Yes	ASDX2	yes	profound and multiple intellectual disabilities (PMID)X6, ID X1	No	n/a	n/a	n/a	n/a	n/a	n/a	nr	nr	n/a	nr
	283	Hutzler	2010	Motivational correlates of physical activity in persons with an intellectual disability: A systematic literature review	systematic review	purpose of this study was to systematically retrieve, examine, and discuss scientific studies focusing on motivational correlates of participation in sport, recreation or health-related physical activities in persons with ID	...	4	Sportdiscus (accessed through EBSCO service provider), Medline, PsychINFO, and Cochrane library	Yes	in text only	nr	1980	2009	No	n/a	D: the research was data-based, the article appeared in English language, Studies were published throughout the 30-year period between 1980 and 2009 P: participants had ID diagnosis I/E: engaged in physical activity either prior to or during the study period, and	n/a	not clear	no explicit C or O defined	Yes	No	21	21	9	9 paeds studies and 3 studies with no SCC intervention/outcome were not relevant	1067	636	399	21	80	mean: Q1 min: 31; Q3 max: 44	n/a	1	No	n/a	Yes	mild-moderate ID in most studies; not defined in 4 studies	No	n/a	no	no	no	no	no	nr	nr	n/a	nr
	17273	Kaltenthaler	2014	The effectiveness of sexual health interventions for people with severe mental illness: A systematic review	systematic review	To evaluate the effectiveness of sexual health interventions for people with SMI compared with usual care and their applicability to the UK NHS setting.	DON'T PRINT - very long	12	MEDLINE, CINAHL, Cochrane Database, CENTRAL, HTA, DARE, PsycINFO, Conference Proceedings Web of Science, UK Clinical Research Network, ClinicalTrials.gov, metaRegister of Controlled trials	yes	in appendix/ supplementary materials	Dec, 2012	inception	2012	No	n/a	P: Adults 18 years+, with SMI, living in the community and their carers/staff I: health promotion intervention or combination of interventions (e.g. educational, behavioural, psychological, counselling, etc. delivered at individual, group and community levels) intended to change the knowledge, attitudes, beliefs, behaviours or practices of individuals and populations to improve their sexual healt…	P: Adults with dementia, personality disorder, chronic depression or intellectual disability were excluded as they are not included in the definition of SMI. D: Reviews of primary studies were not included in the analysis, but were retained for discussion and identification of additional studies. Moreover, the following publication types were excluded from the review: animal models; preclinical a…	PICO	n/a	Yes	Yes	13	14	13	n/a	1863	1193	670	nr	nr	mean age Min: 33.7, max: 42.3	two studies with women, 5 studies with men and 5 studies with mixed gender cohort	1	No	n/a	No	n/a	Yes	All with SMI - schizophrenia or Bipolar	Yes	Yes	No	No	No	0	0	n/a	0
	manual	Kamioka	2014	Effectiveness of animal-assisted therapy: A systematic review of randomized controlled trials	Systematic Review	to summarize the evidence from randomized controlled trials (RCTs) on the effects of animal-assisted therapy (AAT).	DON'T PRINT - very long	14	MEDLINE via PubMed, CINAHL, Web of Science, Ichushi Web (in Japanese), the Global Health Library (GHL), the Western Pacific Region Index Medicus (WPRIM), and PsycINFO. We also searched the Cochrane Database of Systematic Reviews (Cochrane Reviews), the Database of Abstracts of Reviews of Effects (DARE), the Cochrane Central Register of Controlled Trials (CENTRAL), the Cochrane Methodology Registe…	yes	in text only	31/10/2012	1990	2012	No	n/a	P: no restrictions I: AAT in accordance with the classification of the AVMA C: not specified but had to be controlled (RCT) O: cure and rehabilitation effects using the ICD-10 S: RCTs, no restriction on language	none	PICO	comparator not defined, but RCT was so ok	Yes	Yes	11	11	7	ineligible studies were in other patient populations	241	nr	nr	nr	nr	nr	age and sex/gender not reported in nearly all extracted details	1	No	n/a	No	n/a	Yes	Schizophrenia X3, depression X3, psychiatric rehabilitation X1	Yes	yes	No	No	No	0	0	n/a	2
	12798	Lindsay	2019	Pedestrian navigation and public transit training interventions for youth with disabilities: a systematic review	systematic review	what are the best practices and effective components of travel training programs and interventions for youth with disabilities?	...	7	Embase, Medline, Healthstar, AocAbs, ERIC, PsycInfo, Transport	Yes	in appendix/ supplementary materials	nr	1992	2017	no	ICF-DH	P: sample with a disability, defined as an impairment in body structure and function]; 30 years of age or less, or if findings have been delineated by age; I: an empirical study reporting on a transportation training program or intervention (for outdoor spatial navigation); S: published in English, from 1992 to 2017 in a peer-reviewed journal or published conference proceeding.	excluded (1) descriptive or opinion articles; (2) gray literature (i.e., non-peer reviewed reports, etc.); (3) indoor navigation training; and (4) studies where the samples were inadequately described.	not clear	no comparator or outcome defined	yes	yes	29	29	11	8 studies had ineligible disabilities, 7 were in paediatric samples, 3 only compared navigation abilities with a nondisabled control group	143	36	39	nr	nr	min M=19, max M=32	very few studies included sex/gender	2	Yes	one study only	Yes	down syndrome, intellectual disability, developmental disability	No	n/a	No	No	No	No	No	0	3	UKX3	2
		Lorenc	2016	Preventative co-ordinated low-level support for adults with high-functioning autism	systematic review	Did not extract as pretty much all studies overlapped wtih the published paper
	8970	Lorenc	2018	Support for adults with autism spectrum disorder without intellectual impairment: Systematic review	systematic review	to assess the effectiveness of supportive interventions for adults with ASD without intellectual impairment.	...	9	ASSIA, EMBASE, ERIC, MEDLINE, PsycInfo, PubMed, Science Citation Index, Social Science Citation Index, and Social Policy and Practice.	yes	in text only	Nov, 2016	inception	2016	No	n/a	P: adults aged 18 or older (mean age 18+) with ASD without intellectual impairment (i.e. with IQ⩾70), or their families or carers, or focus on an intervention for people with ASD without intellectual impairment I: intervention designed to support individuals in their daily lives C/D: quantitative data on the effectiveness of an intervention (including controlled and uncontrolled studies, as long …	Studies which included some participants with intellectual impair_x0002_ment (IQ<70), or where it was unclear whether such participants were included, were excluded.	PICO	not explicitly cited, but eligiblity criteria for each PICO domain detailed	Yes	Yes	32	33	30	extraction for all 32 given that the two ineligible papers looked at interview training/employment support	653	514	139	nr	nr	min M=18, max M=36	n/a	1	Yes	without ID	No	n/a	No	n/a	No	No	No	No	No	0	4	uk X3, ireland X1	5
	12786	Louw	2019	Enhancing social inclusion of young adults with intellectual disabilities: A systematic review of original empirical studies	systematic review	to provide an in‐depth overview of original empirical studies conducted in the field of intellectual disability of young adults with intellectual disabilities, to describe key factors that facilitate social interaction, and to make recommendations for future research.	...	3	PsycINFO, PubMed, ScienceDirect	Yes	in text only	Jan, 2019	2013	2019	yes	UN Convention on Rights of People with Disability; Two persistent themes of how social inclusion has been studied (interpersonal relationships; community participation)		D: qualitative, quantitative, longitudinal designs and/or intervention studies P: young adults with intellectual disabilities aged 18–30 I/O: social inclusion participation as it relates to developing interpersonal relationships and community engagement Other: peer reviewed publication, January 2013 and January 2019, in English.	not clear	no C clearly defined	yes	no	24	24	11	papers irrelevant to umbrella review due to: No intervention (8 studies), paediatric sample (4 studies), residential change study (1 study)	240	nr	nr	11	64	Min: Q1: 18; Max Q3: 43	sex not reported in most studies	1	No	n/a	yes	severity not reported	No	n/a	No	No	No	No	No	2	1	IrelandX1	2
	25077	Ma	2020	The Impact of Vocational Interventions on Vocational Outcomes, Quality of Life, and Community Integration in Adults with Childhood Onset Disabilities: A Systematic Review	systematic review	to evaluate the evidence for the efectiveness of interventions designed to alleviate subjective social isolation (including loneliness and perceived social support) and/or objective social isolation among people with mental health problems.	...	3	Medline, Web of Science and PsycINFO	no	not provided	jul, 2017	inception	2017	no	n/a	P: MH condition, no age restriction I: interventions designed to alleviate social isolation C: CG receiving TAU, no Rx or wait-list, or a different Rx O: subjective or objective social isolation D: RCTs only	P: primary diagnosis of ID, ASD, dementia, organic illness, substance use or physical health problem	PICO	n/a	yes	yes	30	30	26	excluded 3 studies in paed samples	2357	nr	nr	14	80	Min: Q1: 17; Max Q3: 65	n/a	1	No	n/a	No	n/a	Yes	Schizophrenia/psychosis; depression; social anxiety; personality disorder; PTSD; serious mental illness or heterogeneous MH conditions; phobia	Yes	Yes	Yes	Yes	Yes	0	4	UK X 4,	6
		Masi	2011	Meta-analysis of interventions to reduce loneliness	SR with meta-analysis	goal of this meta-analysis is to provide the rigor called for by previous reviews and quantify the efficacy of the primary intervention strategies targeting loneliness	...	2	PubMed and PsycINFO	Yes	in text only	Sept, 2009	1970	2009	Yes	evolutionary theory/function of loneliness, attachment theory,	P: not defined I: intervention specifically to lower loneliness C: justified separately meta-analysing NR studies and RCTs with CG O: measured loneliness quantitatively D/S: English and in a peer-reviewed journal or doctoral dissertation	excluded from meta-analysis if the intervention targeted depression, anxiety, stress relief, health behaviour, or if the intervention aimed to induce a state of loneliness.	not clear	didn't really define C, but was open to all designs pre-post and cv CG	yes	no	50	not clear	7	7 paeds studies, and the remaining were not in samples with MH diagnoses or clinically elevated symptoms	464	212	252	18	92	Mean min=20, max=76	n/a	1	No	n/a	No	n/a	Yes	mostly depression, SMI, suicidal ideation, trauma	NR	Yes	No	Yes	No	0	0	n/a	2
	manual	Maujean	2015	A Systematic Review of Randomized Controlled Trials of Animal-Assisted Therapy on Psychosocial Outcomes	Systematic Review	to evaluate the evidence for AAI since previous reviews (Nimer and Lundahl 2007), focusing only on highest level of evidence from RCTs and their effects on psychosocial outcomes	...	6	PsycINFO, MEDlINE, PROQUESt, Scopus, Web of Science, and CINAHL	yes	in text only	nr	2008	2012	no	n/a	S: original published journal articles that investigated O: psychological or social outcomes of AAIs I: an aaI was provided and described as part of the study, and not a combination of therapies or pet ownership D: the study design was a randomized controlled trial	pet ownership that is not an AAI	not clear	no comparator defined, no population defined	yes	yes	7	8	4	two studies in children, one in non-palliative radiation therapy not relevant to our umbrella review	170	nr	nr	nr	nr	nr	n/a	1	No	n/a	No	n/a	Yes	psychiatric disorders, schizophrenia X 2, depression	yes	yes	no	no	no	nr	nr	n/a	nr
	25379	McCann	2019	People with intellectual disabilities, relationship and sex education programmes: A systematic review	systematic review	1. What are the views and experiences of people with ID regarding their participation in RSE programmes? 2. What is the perceived benefits of RSE programmes from the perspective of people with ID?	...	4	PsycINFO, CINAHL, MEDLINE and Sociological Abstracts.	Yes	in text only	2018-10-01	1998	2018	Yes	WHO definition of sexuality; equality of access to appropriate healthcare and health education	P: people w ID Concept: experiences/views of RSE program Context: RSE programs in schools, health and social care services D: qualitative, quantitative and mixed-methods approaches	none	PCC	not explicitly using design structure	Yes	No	8	8	3	4 studies in paeds/school setting, one in peer educators and only outcome was that peer educators felt credible so not useful for feasibility	70	nr	nr	12	40	nr	sex not reported for the larger study of 60 ppl.	1	No	n/a	Yes	severity not defined	no	n/a	N/A	N/A	N/A	N/A	N/A	1	2	Ireland X2	0
		Morin	2017	Rehabilitation interventions to promote recovery from schizophrenia: A systematic review	umbrella review	to examine four treatments targeting effectiveness: cognitive remediation, psychoeducation, social skills training, and CT. Specific attention was paid to the functional effects of the treatments.	only use to supplement the social skills training literature	3	PubMed, ScienceDirect, and Google Scholar	Yes	in text only	2017	1995	2017	Yes	Social skill training is generally based on learning theory, and behavioral therapy principles and techniques for teaching individuals to communicate their emotions and requests so that they are more likely to achieve their goals and meet their needs	P: adults with schizophrenia or schizophrenia spectrum disorder I: cognitive remediation, psychoeducation, and cognitive-behavioral therapies C: not defined D: Since the literature on this subject is very abundant, we only selected review articles and meta-analyses S: peer-reviewed articles	reviews that were too specific or included heterogeneous samples	not clear	very poorly written inclusion criteria. Appears as if they made it up as they went along!	Yes	no	80	80	11?	only included reviews of social skills training interventions. It appears that these are citations 61 to 72, but there is no table of the included studies to confirm.	nr	nr	nr	nr	nr	nr	no clear demographic characteristics of the studies/reviews provided	1	No	n/a	No	n/a	Yes	schizophrenia/ schizophrenia spectrum disorders	yes	No	No	No	No	nr	nr	n/a	nr
		Naslund	2015	Emerging mHealth and eHealth interventions for serious mental illness: A review of the literature	Systematic Review	to explore the use of remotely-delivered mHealth and eHealth interventions among individuals with SMI for broad application, including symptom monitor_x0002_ing and assessment, promoting illness self-management, delivering psychoeducation, and supporting positive health behavior change.	6/46 papers had social component to the intervention and outcomes, just extract for those studies	6	MEDLINE, PsychINFO, CINAHL, Scopus, Cochrane Central, and Web of Science	Yes	in text only	Jul, 2014	nr	2014	No	n/a	P: ppl with SMI (schizophrenia, schizoaffective disorder, psychosis or bipolar disorder), could be diagnosed or self-reported. Minimum of 10 participants. I: mHealth or eHealth technology based intervention delivered remotely, which includes remote monitoring, online interventions such as forums or internet support groups, mobile phone-based interventions such as smartphone applications, personal…	Clinician-led interventions were excluded because we were interested in the feasibility and acceptability of remote interventions that do not rely on costly providers. Therefore, we excluded telepsychiatry interventions (e.g. consultation over the phone, videoconference), faceto-face interventions delivered in clinical or research settings, in-person interventions delivered by mental health provi…	not clear	essentially PICO, but didn't explicitly say which comparator types were eligible	yes	yes	46	46	6	the studies not included did not measure SCC capacity/participation (most focused on symptoms, adherence to treatment/ programs etc)	904	nr	nr	nr	nr	nr	n/a	1	No	n/a	No	n/a	Yes	schizophrenia/schizoaffective disorder X 4, FEP/mood disorderX1, bipolar disorder X1	Yes	yes	No	No	No	2	0	n/a	1
	manual	Newlin	2015	Social participation interventions for adults with mental health problems: a review and narrative synthesis	Systematic Review	Did not extract as all but two papers were in Webber 2017, and the papers not incl in that SR were a residential program for homeless people (ineligible) and a leisure program for ppl w ABI (ineligible). Some of the data extraction is better than Webber, though.	printed
	38178	Nguyen	2020	Understanding the essential components and experiences of youth with autism spectrum disorders in peer mentorship programmes during the transition to adulthood: A qualitative meta‐ethnography	SR with meta-qual/ethnography	1. What are the essential components of PM programmes for youngadults (ages 16 to 25) with ASD in post-secondary transition?2. What are the experiences of young adults (ages 16 to 25) withASD in PM programmes during post-secondary transition?	...	7	PsycINFO, Cumulative Index of Nursing andAllied Health Literature (CINAHL), Sociological Abstracts, EducationResources Information Center (ERIC), EMBASE, Web of Science, MEDLINE (Ovid)	yes	in appendix/ supplementary materials	2018-10-18	inception	2018	yes	theoretical frameworks about child development can be applied to better understand PM programmes as an environment for youth with ASD. Bronfenbrenner's ecological systems theory, for example, can help to identify systems that a youth with ASD can be situated in and his or her relationship within that system (Bronfenbrenner, 1992). The life course approach also highlights how there should be a ‘fi…	O: findings focused on the experiences of the peer mentor relationship as well as the training components involved in PM programmes; S: empirical qualitative studies or mixed methods studies with qualitative components S: published in peer reviewed journals	(a) had a nonqualitative design, such as editorial comments and narrative literature reviews; (b) did not have direct quotes or (c) were thesis dissertations.	not clear	Didn't actually define the I (or C)!	Yes	Yes	10	10	10	n/a	213	nr	nr	17	33	Q1 min: 17, Q3 max: 30	includes mentors and mentees	1	yes	ASD severity/diagnosis not reported	No	n/a	No	n/a	N/A	NR	NR	NR	NR	3	1	UK X 1	0
	12643	Pallathra	2019	Psychosocial Interventions Targeting Social Functioning in Adults on the Autism Spectrum: a Literature Review	systematic review	To determine the number of interventions tergeting social functioning, quality of studies, and opportunities for adults to generalise/apply knowledge and skills in the everyday lives in the community	...	3	PsycINFO, PubMed, and EMBASE on OVID	No	not provided	2017-12-01	1980	2017	no	n/a	D: peer reviewed, published in English since 1980 P: aged >16 year with 50% aged 18y+; at least 50% had ASD diagnosis without ID I: psychosocial or behaviour intervention aimed at improving social functioning O: skills, understanding or affective state related to social functioning	I: descriptive studies	not clear	no C clearly defined	Yes	no	41	41	41	n/a	1021	nr	nr	nr	nr	nr	n/a	1	Yes	high functioning ASD	No	n/a	No	n/a	No	No	No	No	No	nr	nr	n/a	nr
	2287	Palmen	2012	A systematic review of behavioral intervention research on adaptive skill building in high-functioning young adults with autism spectrum disorder	systematic review	to systematically examine the state of research on behavioral interventions in improving adaptive behavior in young adults with high-functioning ASD in order to (a) evaluate research areas, techniques, and outcome measures and to (b) identify limitations and promising areas in need of future research.	...	4	ERIC, PsycINFO, PubMed, and Web of Science.	Yes	in text only	Aug, 2010	nr	2010	No	n/a	P: 16years+ diagnosed with ASD w full scale IQ or verbal IQ >=70 I: procedural components based on applied behavioural analysis (ABA) or CBT in nature C: not defined O: adaptive skill related to social interactions or daily living D: systematic data collection proceudres with at least two data points	anecdotal data, results that are presented only at group level if participants had IQ below eligibility criterion, if they targeted only cognitive skill or overall competence.	not clear	no C clearly defined, or publication type	no	no	20	20	9	10 excluded b/c they were in paeds, 1 excluded based on intervention target.	58	44	14	16	55	nr	n/a	1	Yes	high functioning ASD	No	n/a	No	n/a	no	no	no	no	no	nr	nr	n/a	nr
	manual	Pescheny	2020	The impact of social prescribing services on service users: a systematic review of the evidence	systematic review	To collect and synthesize evidence on the impact of SP services based on general practice and involving a navigator on service users, to inform policy, practice, and future research in this field.	...	14	CINAHL, Medline, PsycInfo, SocIndex, SportDiscuss, Web of Science, British Nursing Index, ASSIA, HMIC, University of York for reviews and dissemination (HTA, DARE, NHS EED), Cochrane Library; grey literature (Google, Google Scholar, OpenGrey)	yes	in appendix/ supplementary materials	2018-06-01	inception	2018	no	n/a	P: not defined, but upon checking included studies all provide interventions to people who are socioeconomically vulnerable/ isolated and the vast majority have mental health issues (but don't clearly report what these are) I: assessed SP programmes, activities or interventions, usually based on a primary care setting in the UK, in which primary care staff refers patients to a navigator. C: not d…	none	not clear	no P or C defined in design	yes	no	16	16	16	n/a	nr	nr	nr	nr	nr	nr	no sample characteristics extracted/reported	1	No	n/a	No	n/a	Yes	specific conditions not consistently reported in SR (and not obvious after checking individual studies/reports), but often incl chronic depression/ anxiety	nr	nr	nr	nr	nr	0	16	UK X 16	0
	manual	Petroutsou, Alexandra	2018	Loneliness in people with intellectual and developmental disorders across the lifespan: A systematic review of prevalence and interventions	Systematic Review	Objective 2: to identify whether interventions targeting loneliness in youth and adults with IDD are effective.	Note: only 1 study included, which was already in Bigby 2018	5	Web of Science, PsycINFO, Pubmed, ERIC, EMBASE	yes	in appendix/ supplementary materials	2016-06-01	2000	2016	Yes	conceptualisation of loneliness as: painful, perception that social needs are not being met, multidimensional with social and emotional dimensions.	P: people w IDD, LD etc. I/C: interventions that aimed to decrease loneliness, no restrictions on components, duration, format or setting O: loneliness S: RCTs, quasi-RCTs, case studies Other: English, peer reviewed	n/a	PICO	n/a	Yes	Yes	6	6	1	Only 1 intervention study included	58	42	16	nr	nr	55.6	n/a	1	No	n/a	Yes	a range of diagnoses, mild-mod ID	no	n/a	no	no	no	no	no	1	0	n/a	0
	manual	Puolakka	2019	Effectiveness of psychosocial interventions on quality of life of patients with schizophrenia and related disorders: A systematic review	Systematic Review	to synthesize the best available evidence on the effectiveness of four psychosocial interventions (family intervention, psychoeducation, social skills training, supported em_x0002_ployment) on the QoL of patients with schizophrenia and related dis_x0002_orders	...	5	CINAHL, Cochrane Library, MEDLINE, PsycArticles and PsycINFO	yes	in text only	May, 2018	1990	2018	No	n/a	P: majority of participants had a diagnosis of schizophrenia (F21) or a related disorder (F21-F29) based on the ICD-10, majority of participants were adults (18 years or over); I: psychosocial interventions, incl family interventions, psychoeducation or patient education, social skills training and vocational rehabilitation in line with practice guidelines for the treatment of patients with schiz…	Excluded studies that included chosen interventions only as one element of comprehensive treatment programme because it is not possible to disentangle the effects of some individual treatment intervention from other treatment components. NOT IN METHODS: but in results, excluded two papers based on methodological quality.	PICO	n/a	yes	no	12	12	12	n/a	1142	856	286	nr	nr	M: 24.9-51.2	n/a	1	No	n/a	No	n/a	Yes	schizophrenia/schizo-affective disorder X10, psychotic disorder X2	Yes	No	No	No	No	2	1	UKX1	4
	manual	Quirk	2020	Understanding the experience of initiating community-based group physical activity by people with serious mental illness: A systematic review using a meta-ethnographic approach	SR with meta-qual/ethnography	Systematically search and appraise qualitative research on the experience of initiating community-based group PA for adults living with SMI; Synthesize findings from existing research regarding the experience of initiating community-based group PA and key features of social support within these contexts for people living with SMI; Identify from participants’ experiences the active ingredients tha…	...	9	ASSIA (ProQuest), CINAHL (EBSCO), Cochrane Central Register of Controlled Trials (Wiley), Health Technology Assessment Database (Wiley), MEDLINE (EBSCO), PsycINFO (ProQuest), Sociological Abstracts (ProQuest), SportDiscus (EBSCO), and Web of Science (Thomson Reuters, now Clarivate).	Yes	in appendix/ supplementary materials	2017-11-01	nr	2017	Yes	Mental Health Action Plan: provision of MH services integrated in communities for services uers and facmilies.	P: adults >=18 yeras living with SMI as a primary diagnosis (schizophrenia, bipolar affective disorder, major depressive disorder, personality disorder, severe anxiety (including phobia and obsessive–compulsive disorder), schizophreniform disorder, or psychosis I: community-based group PA, comprising >=3 people to be a group. For multicomponent interventions, physical activity had to be a main co…	n/a	PICO	n/a	Yes	Yes	16	16	16	n/a	198	111	87	nr	nr	nr	limited demographics available	1	No	n/a	No	n/a	Yes	Schizophrenia/ psychosis, SMI, BPD, PTSD,	Yes	Yes	No	yes	No	0	9	UK X9	10
	6882	Ratti	2016	The effectiveness of person-centred planning for people with intellectual disabilities: A systematic review	systematic review	(a) to provide an updated review of status of research concerning the effectiveness of PCP on outcomes for people with ID, (b) to determine whether PCP and its components are effective on improving outcomes for people with ID, (c) to determine what outcomes are most likely to be affected by PCP, (d) to identify directions for future research.	...	7	PsycInfo, Embase, CINHAL, PubMed, Web of Science, Scopus and Medline	Yes	in appendix/ supplementary materials	May, 2014	1990	2014	no	n/a	P: if all participants had ID or IQ <70. D: primary aim to evaluate the effects of PCP on outcomes for ppl w ID us ing qual or quant methods, incl. retrospective case-note and prospective studies. I: No studies were excluded on the basis of the country or setting in which PCP took place. Settings varied from group homes in the community to in-patient settings, and all were considered. O: QoL, lif…	D: Studies were excluded if they evaluated the implementation or processes of PCP but reported no data on the impact of PCP on individuals; if studies only reported process variables such as improved knowledge following training, these were excluded. Studies were also excluded if the main aim of the study was the evaluation of a combination of approaches (e.g. PCP and Positive Behaviour Support).…	not clear	no C clearly defined	yes	unclear	16	16	7	mixed methods studies all in children were not included	180	11	10	16	84	nr	several studies did not report gender/sex or age	3	Yes	ASD included in 1 study	Yes	Most do not disclose severity, but those that do primarily included people with moderate-severe ID	Yes	One study included ppl with secondary PD	NR	NR	NR	NR	NR	0	2	UK X2	0
		Roche	2019	Promoting Health and Well-Being through Social Inclusion in Toronto: A Scoping Review of Literature Reviews of Interventions to Promote Social Inclusion	umbrella review	our intent was to capture or document a broader spectrum of interventions to promote social inclusion.	scoping review of reviews	3	Scopus, Scholars Portal and PubMed	Yes	in text only	nr	2000	2015	Yes	social inclusion as a dynamic construct associated with social connectedness, social capital and civic engagement and social participation	P: any population Concept: Any intervention that included an explicit social inclusion construct (social connectedness, social capital and civic engagement and social participation) Context: Canada, USA, Europe, Australia or New Zealand S: published 2000-2015, systematic reviews, scoping reviews, narrative reviews	n/a	PCC	not explicitly described as PCC, but meets criteria	Yes	no	8	8	4	3 reviews focused on paeds/adolescents and 1 was not specific to disability	n/a	n/a	n/a	n/a	n/a	n/a	n/a	1	No	n/a	No	n/a	Yes	adults living with mental health problems	unclear	unclear	unclear	unclear	unclear	n/a	nr	n/a	n/a
	12529	Sala	2019	Autism and Intellectual Disability: A Systematic Review of Sexuality and Relationship Education	Systematic Review	to address the following questions regarding Autism and intellectual disability: (A) What are the interventions currently ofered to provide SRE to individuals with these diagnoses? (B) In these interventions, what content relating to SRE was covered? (C) How efective were these interventions in increasing participants’ knowledge and behavior relating to sexuality and intimacy? (D) What methods of…	...	5	PsycINFO, MEDLINE Complete, ERIC, CINAHL Complete, Embase	Yes	in text only	Mar, 2018	1980	2018	no	n/a	S: study published in English, peer-reviewed journal; P: participants identifed as having formal diagnosis of ASD, ID, ADHD, ABI or DS; I: intervention predominantly focused on sexual education and/or intimacy skills; that is, biological aspects (e.g., puberty, contraception), and/or broader aspects of sexuality and relationships (e.g., sexual orientation, safety, relationships, dating skills, pr…	studies that were: 1) part of a thesis or dissertation; (2) intervention focused on correcting problematic sexual behavior (3) intervention only focused on one aspect of sexual health (e.g., teaching menstrual hygiene); (4) intervention focused broadly on social skills without emphasis on sexuality and intimacy; (5) published pre-1980.	not clear	no C defined	Yes	Yes	30	31	24	6 paeds studies not relevant. Note that the PRISMA indicates 33 studies were included, but the tables only show 30.	866	339	527	11	62	nr	estimated males/female from all pooled studies.	2	Yes	5 studies included participants with ASD, 3 of whom also had ID	yes	19 studies included participants with ID; diagnosis/severity not reported	No	n/a	N/A	N/A	N/A	N/A	N/A	nr	nr	n/a	nr
	27091	Schepens	2019	How to improve the quality of life of elderly people with intellectual disability: A systematic literature review of support strategies	systematic review	Which support strategies and support interventions can be identified and classified as having influences on QoL outcomes for elderly people with intellectual disability?	only extracted information for the studies that met inclusion criteria: interventions and measured interpersonal relationships or social inclusion outcomes. Very tricky data extraction!	8	ERIC OvidSP, MedLine OvidSP, Sage Journals online, Elsevier Science Direct, Elsevier Scopus, ProQuest, and PubMed databases, all EBSCO databases and Web of Science (including Social Sciences Citation Index and Conference Proceedings Citation Index—Social Sciences & Humanities) were searched	Yes	in text only	Aug, 2017	1995	2017	Yes	active aging (leading a meaningful active life within the community) and the QoL model proposed by Schalock 2004 (domains of emotional, physical and material wellbeing; personal development and self-determination ; and interpersonal relationships, social inclusion and rights).	P: IQ < 75, aged >=50 years old I/O: explicit and strict link was made between variables of (quality of) care/support and QoL outcomes. Other: original, peer‐reviewed, English, Dutch, German, or French research, all with English abstracts and keywords.	Systematic reviews, expert opinions, and reports from symposia	not clear	No C clearly defined, or publication type	Yes	yes	73	73	16	Selected studies relevant to our rvw if they had assessed interpersonal relations or social inclusion outcomes in Table 2 and 3	576	nr	nr	45	80	Mean range: 55.8 to 68.0	none	1	No	n/a	yes	severity not consistently reported	No	n/a	N/A	N/A	N/A	N/A	N/A	6	2	Ireland X 2	2
	4746	Seewooruttun	2014	Interventions aimed at increasing knowledge and improving attitudes towards people with intellectual disabilities among lay people	systematic review	the following questions: (1) what interventions have been developed to tackle low knowledge of and negative attitudes towards ppl w ID?; (2) what were their effects?; and (3) how were these effects measured?	...	3	PsycINFO, Web of Science and PubMed	Yes	in text only	Mar, 2014	1990	2014	no	n/a	S: published in English; published in peer reviewed journals; in the period 1990 to March 2014; P: the sample population was aged 16 years and above; I: intervention that aimed to impact attitudes towards people with intellectual disabilities and/or increase knowledge or understanding of intellectual disability C: not defined O: not defined (assume attitudes/knowledge!)	Studies that related to learning difficulties such as dyslexia, other developmental disorders such as Autistic Spectrum Disorders or physical disability were excluded from the review. Similarly, studies that did not specifically focus on intellectual disability and encompassed a spectrum of disabilities including physical and sensory impairments were excluded	not clear	No C or O defined	yes	no	21	22	21	n/a	3738	nr	nr	nr	nr	nr	Clinicians or clinical trainees (n=802), police officers (n=57), students (n=679), general population or volunteers (n=1841), teachers/trainee teachers (n=314), residential staff (n=45)	1	no	n/a	Yes	Interventions relevant to knowledge/attitudes towards ppl with ID. One study with teachers included somet teachers who had students w/ ID in their class)	No	n/a	N/A	N/A	N/A	N/A	N/A	3	8	UK X 8	0
		Soundy	2014	The transcending benefits of physical activity for individuals with schizophrenia: a systematic review and meta-ethnography. Psychiatry Research 220, 11–19	SR with meta-qual/ethnography	to synthesise research that has documented the experiences of physical activity of patients with schizophrenia and HCPs who work with these individuals	...	9	AMED, CINAHL Plus, Medline (revised), EMBASE, ASSIA, IBSS, Biological Nursing Index, Social Sciences Abstracts, ProQuest Nursing and Allied Health Source, Science Citation Index	Yes	in text only	Jan, 2014	nr	2014	No	n/a	P: ppl w a diagnosis of schizophrenia or if >80% of the sample had schizophrenia according to recognised criteria (DSM-V, ICD-10); D: the research utilised qualitative methods; O: views, perceptions, or experiences of physical activity or exercise of individuals with schizophrenia or the staff within the multi_x0002_disciplinary team working directly with them; S: published in English	(a) two or more used the same the data set; if this happened, the primary author selected the article with the most valuable content; (b) studies were only available as conference proceedings, as a thesis or sum_x0002_marised in a book; (c) studies did not primarily focus on physical activity; (d) studies were a review or commentary; (e) studies were mixed methods or quantitative research.	PCC	not explicit	yes	yes	11	11	11	n/a	108	nr	nr	20	66	nr	sex and age not reported in most papers	1	No	n/a	No	n/a	Yes	schizophrenia	Yes	No	No	No	No	nr	nr	n/a	nr
	5915	Spain	2015	Group social skills interventions for adults with high-functioning autism spectrum disorders: A systematic review	systematic review	Did not extract as all studies included in other reviews - just did AMSTAR	printed																											0	y		n		n
	35011	Spain	2017	Family therapy for autism spectrum disorders	Cochrane Review	Whatis the evidence thatfamily therapy can help to improve communication, strengthen relationships, and enhance coping, mental health and well-being for people who have autism spectrum disorders (ASDs) or their family members, or both?	not printed - no studies identified	17	CENTRAL, MEDLINE, Embase, 10 other databases and three trials registers. W	Yes	in appendix/ supplementary materials	16/1/2017	inception	2017	Yes	systemic theories, and specifically focusing on understanding, enhancing and improving aspects of relationships between individuals with ASD and at least one family member; or between two or more members of the family of an individual with ASD (e.g. parents, or parents and siblings)	P: families with at least one person with ASD diagnosis I: Family therapy C: no Rx, TAU, waitlist, active comparator O: primary=quality or quantity of social interaction and communication, mental health, QoL, adverse effects/events O: secondary: confidence, coping, satisfaction, dropout from treatment, health economic outcomes D: RCTs	none	PICO	n/a	Yes	Yes	0	0	0	no studies identified	0	0	0	n/a	n/a	n/a	n/a	1	Yes	n/a	No	n/a	No	n/a	n/a	n/a	n/a	n/a	n/a	0	0	n/a	0
	10474	Takahashi	2019	The effectiveness of dance/movement therapy interventions for autism spectrum disorder: A systematic review	systematic review	purpose of this study is (a) to verify the quality of DMT and ASD studies from 1970 to 2018 using the PRISMA guidelines, and (b) evaluate the efectiveness of DMT interventions for individuals with ASD.	...	4	Medline, Pubmed, Cinahl, and Springer Link	Yes	in text only	nr	1970	2018	yes	Dance/movement therapy (DMT) is a psychotherapeutic healing tool premised on the theory that the body and mind are connected	P: ppl w ASD, Aspergers or PDD as per DMS or ICD for autism I: dance therapy (not actually specified in selection criteria!) C: not defined O: not defined S: publications in international evidence-based English academic journals between 1970 and 2018	S: meta-analyses, systematic reviews, narrative reviews, theoretical article, conference abstracts, or theses;	not clear	no C or O defined, and didn't explictly state dance interventions in the selection criteria.	Yes	No	7	7	4	3 studies in paediatric samples	221	162	55	14	55	Q1 min: 14, Q3 max: 53	n/a	2	Yes	Two studies IQ>85, Two studies IQ <70	Yes	two studies included ppl with IQ <70	No	n/a	n/a	n/a	n/a	n/a	n/a	nr	nr	n/a	nr
	8166	Tint	2017	A systematic literature review of the physical and psychosocial correlates of Special Olympics participation among individuals with intellectual disability	systematic review	critically examine and synthesise the literature with regard to the impact of participation in SO programming (i.e. Traditional SO sports, Motor Activity Training, Young Athletes Programme, Unified Sports, Healthy Athletes or Athlete Leadership Training) on the physical, psychological/emotional, social and/or cognitive/intellectual development of individuals with ID.	...	5	CINAHL, MEDLINE, PsychArticles, PsycINFO and Sportdiscus electronic	yes	in text only	May, 2015	inception	2015	Yes	According to relational systems theory (Lerner 2006), a positive youth development (PYD) framework posits that positive characteristics develop through mutually beneficial ‘individual-context relations’ (Lerner et al. 2005). Utilising a PYD perspective, the National Research Council and Institute of Medicine (NRCIM) (2002) organises sport outcomes within four main domains of positive development:…	P: SO participants with ID I: SO programs C: studies w/without comparison groups eligible O: physical, psychological/emotional, social or cognitive/intellectual development D: no restrictions on study design	S: non-data-based studies, unpublished dissertations, reports, conference proceedings; not in English; if outcomes were not examined directly in relation to SO participation.	PICO	complete	yes	yes	46	46	18	19 paeds and 10 non-intervention/SCC o/c studies irrelevant	1824	1290	208	12	50	Mean Q1: 24, Q3: 27; Min Q1: 14, Max Q3: 46	sex not reported in three studies, one study only included parents. Total staff (n=89), family (n=546), other - nondisabled partners (n=61)	1	No	n/a	Yes	ID severity not reported	no	n/a	N/A	N/A	N/A	N/A	N/A	0	0	n/a	5
	4857	Tobin	2014	A systematic review of social participation for adults with autism spectrum disorders: Support, social functioning, and quality of life	systematic review	To investigate social participation and support facilitating improved participation and social functioning for adults with ASD	...	4	ERIC, PsycINFO, PsycARTICLES, and PubMed	Yes	in text only	Apr, 2013	1995	2013	yes	model integrating social functioning, social participation, and the social inclusion and interpersonal relations domains of QoL defined by Schalock (2004).	P: adults (85% out of school, or aged 17+), diagnosed with ASD or ppl w ASD comprise >=25% of sample. I: interventions that go beyond simple conversation skill development that focus on supporting social participation and/or social functioning C: not defined O: measures with a functional focus in community environment/ social functioning S: empirical investigation (intervention, observational, qu…	n/a	not clear	No C defined	yes	Yes	13	13	6	5 had no intervention and were not included in umbrella review	164	113	51	17	77	LL Q1 18, UL Q3: 49	n/a	1	Yes	Aspergers:2 Autism: 4	No	n/a	No	n/a	N/A	N/A	N/A	N/A	N/A	0	1	England X 1,	1
	3721	Walker	2013	Peer support in adult mental health services: A metasynthesis of qualitative findings	SR with meta-qual/ethnography	findings from qualitative studies on peer support have not been synthesized to underpin development, and so the aim of this research was to fill this gap. The research objectives were to uncover the active ingredients of peer support by systematically investigating data drawn from the experiences of peer support workers, their nonpeer colleagues, and the recipients of peer support services	...	8	CINAHL [EBSCO], PsycINFO [EBSCO], PsychARTICLES [EBSCO], AMED, Allied and Contemporary Medicine [OVID], MEDLINE [OVID], BNI, British Nursing Index [OVID], SCOPUS.	No	not provided	nr	1990	2010	No	n/a	I/O: studies that investigated experiences of peer support, from the perspectives of recipients, peer support workers, and professional colleagues. Statutory mental health settings and settings that share leadership with statutory mental health settings were included. I: Peer support was defined as providing direct services to people in recovery from mental health problems including substance mis…	Charity organisations and peer-run organizations were excluded. Studies concerned with other health issues were excluded. Also excluded were studies of consultative roles with no direct contact with people in recovery, self-help groups, and peer-run organizations.	STARLIGHT	not really clear how the design fits the STARLIGHT format?	No	No	27	25	not clear	sample characteristics not provided, so assume all met our criteria	380	nr	nr	nr	nr	nr	Sample size includes the peer workers and peer recipients. 138 non-peer staff were also included.	1	No	n/a	No	n/a	yes	not reported	NR	NR	NR	NR	NR	2	3	UK X3	0
	manual	Webber	2017	A review of social participation interventions for people with mental health problems	systematic review	to summarise social participation intervention models which have at least some evidence of positive social network outcomes. Its purpose is to illustrate the diversity of approaches which practitioners use, highlight gaps in the evidence base and suggest future directions for research.	...	8	PsycINFO, MEDLINE, Pubmed, CINAHL, Embase, Social Policy and Practice, Social Services Abstracts, and the Cochrane Library	Yes	in text only	Nov, 2016	nr	2016	Yes	one of the interventions (Groups for Health) draws upon social identity theory [39] and self-categorisation theory [40] through its understanding that group membership provides people with a distinctive sense of self. In particular, it was informed by the social identity model of identity change [41] which emphasises group processes which target social connectedness.	P: any diagnosed mental health program, excluding substance misuse I: psychosocial interventions comprising a specific social component adressing psychological or social needs rather than biological needs; individual or group C: studies with/wihout a comparison were eligible O: social networks or social participation either in the intervention setting/group or in the community	I: pharmacological, physical or pscyhological interventions with no social element. Online interventions with no face to face contact.	PICO	n/a	no	no	19	22	18	did not include the ABI group social skill training study	nr	nr	nr	nr	nr	nr	Models/findings summarised at the group level, not at the study level. No individual study characteristics reported. Studies conducted in 14 countries.	1	No	n/a	no	n/a	yes	schizophrenia/schizo-affective/psychosis, depression/anxiety, SMI, other MH conditions not defined	Yes	Yes	Yes	no	NR	nr	nr	n/a	nr
	4957	Wilson	2014	A systematic review of interventions to promote social support and parenting skills in parents with an intellectual disability	systematic review	to systematically review two types of interventions for parents with ID: those designed to strengthen social relationships and those developed to teach parenting skills	printed	8	OVID databases including, psycINFO (from 1987), EMBASE (from 1980), ERIC (from 1965), Medline (without revisions from 1996), MIDRIS, CINAHL (from 1937) and ASSIA (from 1987)	yes	in text only	nr	1999	nr, but most recent paper was 2010	No	n/a	P/I: interventions for parents with ID O: quantitative outcome measures to judge the effectiveness of the intervention. C/S: Studies in the English language that were carried out internationally were included. As reviews of earlier research in parental skills teaching have been previously carried out (e.g. Feldman 1994; Wade et al. 2008; Coren et al. 2010) and given the wider scope of this review…	Studies that had unclear or inadequate outcome measures or did not provide adequate descriptive information regarding the intervention were excluded.	not clear	no specific outcome defined, no C	No	No	7	7	7	n/a	157	19	138	20	52	Mean: 29-42	n/a	1	No	n/a	yes	some studies had participants with all or most IQ>70	No	n/a	No	No	No	No	No	nr	nr	n/a	nr
	4957	Williams	2018	A systematic review of mental health and wellbeing outcomes of group singing for adults with a mental health condition	Systematic review	aimed to assess the viability of choir singing to improve mental health and wellbeing in people with a mental health condition. It also reviewed the methodology used in this research to make recommendations for future research in this emerging field	...					2017	nr	2017			P: people aged 18+ with MH condition I: singing group participation in community settings C/methods: quant/qual O: MH, wellbeing and QoL or participation themes	P: other cognitive/neurological conditions	PICO		yes	yes	12	13	11																					5	5	UKX5	0
	4957	Siette	2017	Effectiveness of befriending interventions: a systematic review and meta-analysis	SR with meta-analysis	aim of this systematic review was to evaluate the evidence for the effectiveness of befriending across a broad range of health conditions and clinical and social outcomes.	...					2017-02-01	inception	2017			P: people of all ages living in the community allocated to a befriending intervention I: agency based befriending interventions where a pt is introduced to one or more volunteer individuals whose main aim is to provide additional social support through the development of an affirming, emotion-focused relationship over time C: usual care or no treatment O: "broad range of clinical and social outco…	not defined	not clear	not presented w PICO structure	yes	yes	13	14	6																					0	3	UKX2, IrelandX1	0
	4957	Clatworthy	2013	Gardening as a mental health intervention: a review	systematic review	to evaluate the current evidence-base for gardening-based mental health interventions	...					nr	2003	nr, but most recent paper was 2011			P: adults experiencing "functional MH difficulties" I: active horticulture C: nr O: nr published in peer-reviewed journal written in English		not clear	not explicitly PICO design	yes	no	7	10	7																					0	3	UKX3	2
	4957	Picton	2020	Experiences of outdoor nature-based therapeutic recreation programs for persons with a mental illness: A qualitative systematic review	SR with meta-qual/ethnography	to identify, appraise, and synthesize the best available evidence related to participation in outdoor, nature-based TR programs for adults with a mental illness living in the community	..					2019	inception	2019			P: adults 18yrs+ with mental illness diagnosis, living in the community, referred to a therapeutic recreation program Phenomena: subjective experiences of outdoor nature based programs. programs/service/initiatives offering outdoor nature-based recreation activties including adventure camps; TR; sporting, gardening, and community-based leisure programs; and healthy lifestyle programs that are pri…	excluded if the primary focus of the study was on exercise, fitness, or physical activity with the aim to enhance solely physiological outcomes such as weight loss, power, flexibility, or physical behavior changes.	not clear	n/a	yes	yes	18	18	18																					3	11	Ireland X1, UKX10	0
	4957	Genter	2015	The contribution of allotment gardening to health and wellbeing: A systematic review of the literature	systematic review	Question: Does allotment gardening contribute to health and wellbeing?	...					2015-02-01	1998	2015			P: people engaged in active allotment gardening, aged 18+ years I: allotment gardening C: nr O: health and wellbeing	I: papers on community gardens papers in languages other than English	PICO	not explicitly PICO design	yes	yes	10	10	3																					0	2	UKX2	1
	4957	Fortuna	2020	Digital Peer Support Mental Health Interventions for People With a Lived Experience of a Serious Mental Illness:Systematic Review	systematic review	objectives were (1) to expand on prior reviews that focused on peer support services that did not include technology [4,5] or that focused on peer support using technology but only for people with psychosis [13] and (2) to conduct a systematic literature review to assess the feasibility, acceptability, and potential effectiveness of digital peer support interventions for adults with serious menta…	...					2018-12-01	1946	2018			P: Individuals aged≥18 years with either a diagnosis of schizophrenia spectrum disorder (schizophrenia or schizoaffective disorder) or bipolar disorder. I: Digital peer support interventions, including peer-delivered interventions, peer augmented interventions, and peer-to-peer social media interventions. Interventions could have been delivered at any location such as participants’ homes, primary…	Research protocols, letters to the editor, review articles, pharmacological studies, theoretical articles, and articles that were not peer-reviewed were excluded from this systematic review.	PICOS		yes	yes	30	30	8																					4	0		0
	4957	Fuhr	2014	Effectiveness of peer-delivered interventions for severe mental illness and depression on clinical and psychosocial outcomes: a systematic review and meta-analysis	SR with meta-analysis	(1) to synthesise the global evidence of peer-delivered interventions on clinical and psychosocial out_x0002_comes among individuals with severe mental illness (SMI) or depression (2) to update earlier reviews on that topic, and (3) to provide further guidance for future research on peer-delivered interventions	...					2012-12-01	inception	2012			P: adults diagnosed with a mental disorder according to ICD-10 or DSM-IV I: peer-delivered intervention C: TAU or Rx by a professional health worker O: mental healht outcomes D: RCTs		PICOS		yes	yes	14	14	5																					0	0		1
	4957	White	2020	The effectiveness of one-to-one peer support in mental health services: a systematic review and meta-analysis	SR with meta-analysis	a) systematically review all the available peer-reviewed evidence for one-to-one peer support interventions for adults using mental health services b) evaluate the effects of one-to-one peer support in mental health services on a range of pre-specified outcomes c) investigate, using subgroup analyses, how heterogeneity in intervention (i.e. type of peer support, quality of organisational support …	...					2015-04-01	inception	2015			P: adults using MH services I: one-to=one support intentionally provided by a peer worker, including both ‘adjunctive’ and ‘substitute’ peer support interventions C: all possible comparator condition O: Hospitalisation, Emergency service use, Employment, Overall psychiatric symptoms, Symptoms of psychosis, Depression and anxiety, Quality of Life, Recovery (self-rated), Hope, Empowerment, Satisfac…	Studies were excluded if peer support was: not the primary means of delivering the intervention; not one-to-one or intentionally provided by a peer worker; where mental health was not the primary focus of the intervention. Other exclusions were applied if the study was not in the English language, non-retrievable, or did not contain empirical data.	PICOS		yes	yes	23	23	11																					1	2	UKX2	1
	4957	Pitt	2013	consumer-providers of care for adult clients of statutory mental health services	cochrane Review	To assess the effects of employing current or past adult consumers of mental health services as providers of statutory mental health services.	Not extracted as all studies already included in other SRs																11	11	4	All included in other SRs
	4957
	4957
	4957
					ALL STUDIES	STUDIES NOT EXTRACTED	TOTAL EXTRACTED
				COUNT: SR	42	2	40
				COUNT: SR with meta-qual	5		5																										COUNT if >1 disability	11											COUNT if "n/a"	1	0		1
				COUNT: meta-analysis	3		3																				32793						COUNT if "unclear"		1		0		0						COUNT if "nr"	18	20		18
				COUNT: Cochrane reviews	5	2	3																										COUNT if "no"		36		29		28						COUNT if 0	19	12		17
				COUNT: Scoping review	2		2																										COUNT if "yes"		16		24		25						COUNT if > =1	16	22		18
				COUNT: Umbrella review (reclassified Roche as umbrella review, as it was a scoping review that only included SRs)	2		2																												53		53		53							54	54		54
					59	4	55																																							35
																																													Sum	39	84		69
[truncated: 113 more columns]

## Sheet: AMSTAR
				1		2		3		4		5		6		7		8		9		10		11		12		13		14		15		16			1	2	3	4	5	6	7	8	9	10	11	12	13
				PICO: population, intervention, comparison, outcome SPICE: setting, population/perspective, intervention, comparison, evaluation PCC: population, concept, context		A-priori protocol		Explanation of study selection		search strategy & justified eligibility		screening in duplicate		extraction in duplicate		Full text exclusion details		Study designs extracted/reviewed in sufficient detail		RoB assessed with appropriate technique		funding of included studies reported		meta-analysis method appropriate		meta-analysis wrt RoB impacts		RoB taken into consideration in synthesis		Heterogenity		meta-analysis publishing biases		SR author COIs			PICO	A-priori protocol	Explanation of study selection	search strategy & justified eligibility	screening in duplicate	extraction in duplicate	Full text exclusion details	Study designs extracted/reviewed in sufficient detail	RoB assessed with appropriate technique	funding of included studies reported	meta-analysis method appropriate	meta-analysis wrt RoB impacts	RoB taken into consideration in synthesis
	First Author	Year	Publication title	score	Notes	score	Notes	score	Notes	score	Notes	score	Notes	score	Notes	score	Notes	score	Notes	score	Notes	score	Notes	score	Notes	score	Notes	score	Notes	score	Notes	score	Notes	score	Notes
	Anderson	2015	Can mental health interventions change social networks? A systematic review.	yes		partial	CRD42015020540; did not have a clear plan for meta-analysis, and did not plan for examining sources of heterogeneity	no	didn't explain why they restricted to RCTs	yes	Didn't consult content experts, but senior author is a psychiatrist/neurologist/psychotherapist	yes	checked random 20% of citations, but didn't say whether these were all consistent.	no	not clear, appears only that ROB was double rated	no		yes		yes		no		n/a		n/a		yes		yes		n/a		no		.	yes	partial	no	yes	yes	no	no	yes	yes	no	n/a	n/a	yes
	Atkinson-Jones	2019	Do group interventions help people with autism spectrum disorder to develop better relationships with others? A critical review of the literature	No	No comparator or Outcome defined in design	No	No protocol	No	No explanation for study design selection	yes	No search restrictions mentioned	No	duplicate screening not mentioned	No	duplicate extraction not mentioned	No	Excluded paper reasons not given	No	Did not explain the comparator group for active control	No	No ROB assessment	No	Funding for studies not recorded	n/a	No meta-analyses	n/a	No meta-analyses	No	No RoB	Yes	Discussed heterogeneity of one study only, but not across the studies included	n/a	No meta-analyses	No	authors COI or funding not disclosed	.	No	No	No	yes	No	No	No	No	No	No	n/a	n/a	No
	Bigby	2018	Identifying conceptualizations and theories of change embedded in interventions to facilitate community participation for people with intellectual disability: A scoping review	yes	PCC addressed	No		No	No mention of eligible study designs (even if "all" are eligible)	yes	No search restrictions mentioned	yes		no	nr	no	not at the level of individual studies excluded	yes		no	informal documentation of study weaknesses	no	Funding for studies not recorded	n/a	No meta-analyses	n/a	No meta-analyses	Yes	Outcomes synthesised in the context of study weaknesses	Yes	Results discussed wrt differences in ID severity	n/a		no		.	yes	No	No	yes	yes	no	no	yes	no	no	n/a	n/a	Yes
	Bigby	2012	Social inclusion and people with intellectual disability and challenging behaviour: A systematic review	no	No comparator defined in design	no		no		partial		no		no		no		yes		no		no		n/a		n/a		no		yes		n/a		yes		.	no	no	no	partial	no	no	no	yes	no	no	n/a	n/a	no
	Bondár	2020	The effects of physical activity or sport‐based interventions on psychological factors in adults with intellectual disabilities: a systematic review	yes	not explicitly presented as PICO, but addressed each domain	no		yes	explained but not justified	yes		yes		no	second reviewer checked accuracy, not blinded	no	not at the level of individual studies excluded	yes		yes		no	Funding for studies not recorded	n/a	No meta-analyses	n/a	No meta-analyses	yes		no		n/a		yes		.	yes	no	yes	yes	yes	no	no	yes	yes	no	n/a	n/a	yes
	Bourne	2018	A systematic review to investigate dramatherapy group work with working age adults who have a mental health problem	yes	PICO references, P and I included in inclusion criteria, no C or O stated in methods, research design stated	no	PROSPERO registered, but did not sufficiently explain all criteria	yes		no	did not provide search terms	yes		no		no	not at the level of individual studies excluded	partial	did not describe interventions in detail, did not clearly explain follow up assessment times	no		no	Funding for studies not recorded	n/a	No meta-analyses	n/a	No meta-analyses	no		yes		n/a		yes		.	yes	no	yes	no	yes	no	no	partial	no	no	n/a	n/a	no
	Bundock	2017	A review of social skills interventions for adults with autism and intellectual disability	no	does not specify eligible C	partial	did not have a clear plan for investigating causes of heterogeneity	no		yes		no		no		no	not at the level of individual studies excluded	yes		yes	Downs and Black's checklist	no	Funding for studies not recorded	n/a	No meta-analyses	n/a	No meta-analyses	yes		yes		n/a		no		.	no	partial	no	yes	no	no	no	yes	yes	no	n/a	n/a	yes
	Coren	2011	Parenting training for intellectually disabled parents: A Cochrane systematic review	yes		partial	did not include a plan for heterogeneity assessment	yes		partial	didn't consult experts, not clear if reference lists searched	yes		yes		yes		yes		yes		no	Funding for studies not recorded	n/a	No meta-analyses	n/a	No meta-analyses	yes		yes		n/a		yes		.	yes	partial	yes	partial	yes	yes	yes	yes	yes	no	n/a	n/a	yes
	Crowe	2010	Disorder-specific psychosocial interventions for bipolar disorder-A systematic review of the evidence for mental health nursing practice	No	no C defined	no		No		partial		no		no		no		no	design not reported, control group not described	no	allegedly did a ROB assessment, but didn't report it in the paper	no		n/a		n/a		no		no		n/a		yes		.	No	no	No	partial	no	no	no	no	no	no	n/a	n/a	no
	Exell	2020	Interventions that support adults with brain injuries, learning disabilities and autistic spectrum disorders in dating or romantic relationships: a systematic review	no		partial		yes		partial		no		no		No	not at the level of individual studies excluded	No	Control group not described for Valentini, research designs not clear (mainly b/c of valentini, but also the other studies for which outcomes extraction was not done)	yes		no	Funding for studies not recorded	n/a	No meta-analyses	n/a	No meta-analyses	yes		no		n/a		yes	none to disclose	.	no	partial	yes	partial	no	no	No	No	yes	no	n/a	n/a	yes
	Feng	2020	Morita therapy for schizophrenia: An updated meta-analysis	yes		yes		yes		yes		yes		yes		no	not at the level of individual studies excluded	partial		yes		no	Funding for studies not recorded	yes	No meta-analyses	yes	No meta-analyses	yes		yes		yes		yes	none to disclose	.	yes	yes	yes	yes	yes	yes	no	partial	yes	no	yes	yes	yes
	Fernandez-Sotos	2020	Virtual reality for psychosocial remediation in schizophrenia: A systematic review	no	no C defined	no	not disclosed	no	just stated inclusion/exclusion, not why	partial		yes		no		no	not at the level of individual studies excluded	no	did not extract and report "social functioning" outcomes, or some of the other symptom outcomes in detail.	no		no		n/a		n/a		no		no		n/a		yes		.	no	no	no	partial	yes	no	no	no	no	no	n/a	n/a	no
	Finkel	2020	The Open Studio Approach to Art Therapy: A Systematic Scoping Review	yes	consistent with PCC	no		yes		yes		yes		no		no		partial		no		no		n/a		n/a		no		no		n/a		yes		.	yes	no	yes	yes	yes	no	no	partial	no	no	n/a	n/a	no
	Firth	2015	A systematic review and meta-analysis of exercise interventions in schizophrenia patients	no	no C defined	no		no		partial		yes		no		no		yes		yes		no		yes		no		no		yes		no		yes		.	no	no	no	partial	yes	no	no	yes	yes	no	yes	no	no
	Firth	2016	Motivating factors and barriers towards exercise in severe mental illness: a systematic review and meta-analysis.	yes	consistent with PCC	no		yes		partial		yes		no		no		no	study designs not clear	no		no		yes		no		no		no		no		yes		.	yes	no	yes	partial	yes	no	no	no	no	no	yes	no	no
	Geretsegger	2017	Music therapy for people with schizophrenia and schizophrenia-like disorders	yes		yes		yes		yes		yes		yes		yes		yes		yes		no		yes		yes		yes		yes		yes		yes		.	yes	yes	yes	yes	yes	yes	yes	yes	yes	no	yes	yes	yes
	Gonzalvez	2018	Efficacy of sex education programs for people with intellectual disabilities: A meta-analysis	yes	not explicitly presented as PICO, but addressed each domain	no		yes		partial		no		no		no		yes		no		no		yes		no		no		yes		yes		yes		.	yes	no	yes	partial	no	no	no	yes	no	no	yes	no	no
	Grant	2017	Social cognition interventions for people with schizophrenia: A systematic review focussing on methodological quality and intervention modality	yes		no		no		partial		yes		no		no		yes		no	not enough detail provided, and did not report by each domain for each study	no		n/a		no		yes		yes		n/a		yes			yes	no	no	partial	yes	no	no	yes	no	no	n/a	no	yes
	Hallett	2019	Physical activity for autistic adults: Recommendations for a shift in approach	no	no O defined	no		no		no		no		no		no		no	not clear what the control group was for Mateos, or whether Elliott used multiple baseline or group level analysis	no		no		n/a		n/a		partial		no		n/a		yes		.	no	no	no	no	no	no	no	no	no	no	n/a	n/a	partial
	Howarth	2016	Health and social care interventions which promote social participation for adults with learning disabilities: A review	no	no C defined	no		yes		yes		yes		no		no	not at the level of individual studies excluded	no	did not describe the control groups	yes		no		n/a		n/a		yes		no		n/a		no		.	no	no	yes	yes	yes	no	no	no	yes	no	n/a	n/a	yes
	Hutchinson	2015	The effectiveness of intensive interaction, a systematic literature review	no	C: not defined, O: examining effects on outcomes (not defined	no		no		partial		no		no		no		partial		yes		no		n/a		n/a		yes		no		n/a		no		.	no	no	no	partial	no	no	no	partial	yes	no	n/a	n/a	yes
	Hutzler	2010	Motivational correlates of physical activity in persons with an intellectual disability: A systematic literature review	no	no C or O explicitly defined in design	no		no	did not EXPLAIN selection	partial		no	not reported	no	not reported	no	not at the level of individual studies excluded	no	Did not clearly report in results which intervention studies were RCTs, summary results described only	yes		no		n/a		n/a		no	only determined ROB for intervention studies, described in a separate section of the results	no		n/a		no		.	no	no	no	partial	no	no	no	no	yes	no	n/a	n/a	no
	Kaltenthaler	2014	The effectiveness of sexual health interventions for people with severe mental illness: A systematic review	yes		yes	CRD42013003674	yes		yes		no	only partly	no	one reviewer, checked for accuracy by second author	yes		yes		yes		yes		n/a		n/a		yes		no		n/a		yes		.	yes	yes	yes	yes	no	no	yes	yes	yes	yes	n/a	n/a	yes
	Kamioka	2014	Effectiveness of animal-assisted therapy: A systematic review of randomized controlled trials	yes		partial	CRD42012003032 - no mention of presence/absence of meta-analysis plan or how to deal with sources of heterogeneity	yes	justified in introduction	yes		yes		yes		yes		no	control condition not described for two studies (21 and 22)	yes		yes		n/a		n/a		no		no		n/a		yes		.	yes	partial	yes	yes	yes	yes	yes	no	yes	yes	n/a	n/a	no
	Lindsay	2019	Pedestrian navigation and public transit training interventions for youth with disabilities: a systematic review	no	no comparator or outcomes defined in design	no		no	no explanation of why research designs were eligible	partial		no	not explicitly stated	no	checked by second author	no	not at the level of individual studies excluded	no	not clear what the comparator and research design were for some studies	no	not clearly described to allow us to ascertain	no		n/a		n/a		no	not done clearly enough!	no		n/a		yes		.	no	no	no	partial	no	no	no	no	no	no	n/a	n/a	no
	Lorenc	2018	Support for adults with autism spectrum disorder without intellectual impairment: Systematic review	yes	although not explicit	partial	CRD42015029662	no	no explanation	yes		yes		no	checked by second author, but don't report accuracy	no		yes		yes		no		n/a		n/a		no		no		n/a		no		.	yes	partial	no	yes	yes	no	no	yes	yes	no	n/a	n/a	no
	Louw	2019	Enhancing social inclusion of young adults with intellectual disabilities: A systematic review of original empirical studies	no	no C defined	no		no	not explained	partial		no		yes		no	not at the level of individual studies excluded	no	no details on ID severity for majority of papers	yes		no		n/a		n/a		no		no		n/a		no		.	no	no	no	partial	no	yes	no	no	yes	no	n/a	n/a	no
	Ma	2020	The Impact of Vocational Interventions on Vocational Outcomes, Quality of Life, and Community Integration in Adults with Childhood Onset Disabilities: A Systematic Review	yes		No	did not refer to a prior protocol	no	only RCTs included, but didn't explain why	partial	no trial registries or expert consultation	yes		no		no	not at the level of individual studies excluded	yes		yes		no		n/a		n/a		yes		no		n/a		yes		.	yes	No	no	partial	yes	no	no	yes	yes	no	n/a	n/a	yes
	Masi	2011	Meta-analysis of interventions to reduce loneliness	yes	didn't specify comparator, but included different trial designs separately	no		yes		partial		no		no		no		no	not clear what the comparator conditions are	no		no		yes	although their meta-analysis is not useful to us b/c it includes non-MH studies	no		no		yes		no		yes		.	yes	no	yes	partial	no	no	no	no	no	no	yes	no	no
	Maujean	2015	A Systematic Review of Randomized Controlled Trials of Animal-Assisted Therapy on Psychosocial Outcomes	no	no population or comparator eligibility defined	no		yes		partial	not clear if experts consulted, grey literature searched etc.	yes		no	not reported	no	not at the level of individual studies excluded	no	missing demographics of the samples	no		no		n/a		n/a		no		no		n/a		no		.	no	no	yes	partial	yes	no	no	no	no	no	n/a	n/a	no
	McCann	2019	People with intellectual disabilities, relationship and sex education programmes: A systematic review	yes	PCC criteria addressed although not explicitly	no		no	not explained	partial		yes		yes		no		partial	only described key findings, didn't report effect sizes/data	yes		no		n/a		n/a		no		yes		n/a		no		.	yes	no	no	partial	yes	yes	no	partial	yes	no	n/a	n/a	no
	Morin	2017	Rehabilitation interventions to promote recovery from schizophrenia: A systematic review	no		no		yes		partial		no	only for some oft he citations	no		no		no		no		no		n/a		n/a		no		yes		n/a		no		.	no	no	yes	partial	no	no	no	no	no	no	n/a	n/a	no
	Naslund	2015	Emerging mHealth and eHealth interventions for serious mental illness: A review of the literature	yes	not explicitly PICO, but essentially covered by describing designs	no		yes		partial		no	only reviewed full texts that were excluded	no		no		yes		no	justified not judging ROB	no		n/a		n/a		yes		no		n/a		yes		.	yes	no	yes	partial	no	no	no	yes	no	no	n/a	n/a	yes
	Nguyen	2020	Understanding the essential components and experiences of youth with autism spectrum disorders in peer mentorship programmes during the transition to adulthood: A qualitative meta‐ethnography	no		no		no		partial		yes		yes		no		no	did not describe ASD severity/characteristics	yes		no		n/a		n/a		no		yes		n/a		yes		.	no	no	no	partial	yes	yes	no	no	yes	no	n/a	n/a	no
	Pallathra	2019	Psychosocial Interventions Targeting Social Functioning in Adults on the Autism Spectrum: a Literature Review	no	no c defined	no		no		partial		no		no		no	not at the level of individual studies excluded	no	no details on controls, difficult to marry the results in text with the studies in the table	no	unclear if the ROB included ax of blinding, allocation concealment etc.	no		n/a		n/a		no		no		n/a		yes	none to disclose		no	no	no	partial	no	no	no	no	no	no	n/a	n/a	no
	Palmen	2012	A systematic review of behavioral intervention research on adaptive skill building in high-functioning young adults with autism spectrum disorder	no	no c defined	no		yes		partial		no		yes		no		no	outcome measures not clearly reported in tables	no	certainty of evidence evaluated	no		n/a		n/a		yes		no		n/a		no		.	no	no	yes	partial	no	yes	no	no	no	no	n/a	n/a	yes
	Pescheny	2020	The impact of social prescribing services on service users: a systematic review of the evidence	no	no participant or comparison defined in design	no	none listed/referred to	no	did not specify eligible study designs	partial		no	second reviewer checked a random 25% of citations/full texts. Did not report agreement	no	extraction by one reviewer and checked by a second, but didn't report accuracy	no	not at the level of individual studies excluded	no	comparators and follow up timeframes not reported	no	not clear in manuscript which aspects of allocation, blinding, selective reporting were judged	no		n/a	n/a	n/a	n/a	yes	..	yes		n/a		yes			no	no	no	partial	no	no	no	no	no	no	n/a	n/a	yes
	Petroutsou, Alexandra	2018	Loneliness in people with intellectual and developmental disorders across the lifespan: A systematic review of prevalence and interventions	yes		no		no	stated but not explained	partial		no		no		no	not at the level of individual studies excluded	yes		yes		no		n/a		n/a		yes		n/a		n/a		yes		.	yes	no	no	partial	no	no	no	yes	yes	no	n/a	n/a	yes
	Puolakka	2019	Effectiveness of psychosocial interventions on quality of life of patients with schizophrenia and related disorders: A systematic review	yes	pico!	no		no		partial		yes		yes		no		yes		yes		no		n/a		n/a		no		no		n/a		no		.	yes	no	no	partial	yes	yes	no	yes	yes	no	n/a	n/a	no
	Quirk	2020	Understanding the experience of initiating community-based group physical activity by people with serious mental illness: A systematic review using a meta-ethnographic approach	yes	pico!	yes	published!	yes		partial		no	reported that 10% were double-checked by another reviewer, but didn't report agreement	no		no		yes		yes		no		yes		yes		yes		yes		no		yes		.	yes	yes	yes	partial	no	no	no	yes	yes	no	yes	yes	yes
	Ratti	2016	The effectiveness of person-centred planning for people with intellectual disabilities: A systematic review	no	no comparator defined in design	no		no		partial	did not search trial registries or grey literature, did not consult experts, last search two years before publication	no	only had R2 screen ambiguous citations	no	checking of second reviewer not assessed	no	not at the level of individual studies excluded	no		partial	not clear if exposure/outcomes and selective reporting assessed	no		n/a		n/a		no		no		n/a		yes	none to disclose	.	no	no	no	partial	no	no	no	no	partial	no	n/a	n/a	no
	Roche	2019	Promoting Health and Well-Being through Social Inclusion in Toronto: A Scoping Review of Literature Reviews of Interventions to Promote Social Inclusion	yes	consistent with PCC	No		yes		partial		no		no		no		no		no		no		n/a		n/a		no		no		n/a		no			yes	No	yes	partial	no	no	no	no	no	no	n/a	n/a	no
	Sala	2019	Autism and Intellectual Disability: A Systematic Review of Sexuality and Relationship Education	no	no C defined	no		no		partial		no		no		no		partial	the nature of some of the interventions is not clear	yes		no		n/a		n/a		yes	all studies had weak quality	no		n/a		yes		.	no	no	no	partial	no	no	no	partial	yes	no	n/a	n/a	yes
	Schepens	2019	How to improve the quality of life of elderly people with intellectual disability: A systematic literature review of support strategies	no	no comparator defined in design	no	no registered/declared written protocol	no		partial	did not search trial registries or grey literature, did not consult experts, last search two years before publication	no		no		no	not at the level of individual studies excluded	no	did not describe comparators or how outcomes were measured for quant studies	partial		no		n/a		n/a		no	only that physical activity interventions had higher quality	no		n/a		yes	none to disclose	.	no	no	no	partial	no	no	no	no	partial	no	n/a	n/a	no
	Seewooruttun	2014	Interventions aimed at increasing knowledge and improving attitudes towards people with intellectual disabilities among lay people	no	no comparator or outcome defined in design	no		no	no study designs specified	partial		no	not reported	no	not reported	no		partial	not clear if experimental designs were RCTs or just comparing single exposures	no		no		n/a		n/a		no		yes		n/a		no		.	no	no	no	partial	no	no	no	partial	no	no	n/a	n/a	no
	Soundy	2014	The transcending benefits of physical activity for individuals with schizophrenia: a systematic review and meta-ethnography. Psychiatry Research 220, 11–19	yes	consistent with PCC	no		yes		partial		no	only for full text articles	no		no		yes		yes	RCT/NRSI criteria not applicable, but appropriate quality appraisal conducted	no		yes	meta-ethnography	n/a		no		no		n/a		yes		.	yes	no	yes	partial	no	no	no	yes	yes	no	yes	n/a	no
	Takahashi	2019	The effectiveness of dance/movement therapy interventions for autism spectrum disorder: A systematic review	no	no C or O defined, also didn't actually specify the I criteria!	no		no	no explanation, just stated eligiblity	partial		no		no		no		no	control groups not clear	partial		no		n/a		n/a		yes		yes		n/a		no		.	no	no	no	partial	no	no	no	no	partial	no	n/a	n/a	yes
	Tint	2017	A systematic literature review of the physical and psychosocial correlates of Special Olympics participation among individuals with intellectual disability	yes		no		no	no explanation, just stated eligiblity	partial		yes		no		no		yes		no		no		n/a		n/a		yes		yes		n/a		no		.	yes	no	no	partial	yes	no	no	yes	no	no	n/a	n/a	yes
	Tobin	2014	A systematic review of social participation for adults with autism spectrum disorders: Support, social functioning, and quality of life	no	no C defined	no		yes		partial		yes		no		no	not at the level of individual studies excluded	partial	didn't report follow up period	no	unclear if the ROB included ax of allocation concealment etc.	no		n/a		n/a		yes		yes		n/a		no		.	no	no	yes	partial	yes	no	no	partial	no	no	n/a	n/a	yes
	Walker	2013	Peer support in adult mental health services: A metasynthesis of qualitative findings	no	state that they used the STARLIGHT framework, but not clearly defined/reported	no		yes		no		no	not reported	no	not reported	no		no	not clear what the population or interventions were	yes		no		n/a		n/a	n/a	no		no		n/a		no			no	no	yes	no	no	no	no	no	yes	no	n/a	n/a	no
	Webber	2017	A review of social participation interventions for people with mental health problems	yes		no		no		no		no		no		no	not at the level of individual studies excluded	no		no		no		n/a		n/a		no		no		n/a		yes		.	yes	no	no	no	no	no	no	no	no	no	n/a	n/a	no
	Wilson	2014	A systematic review of interventions to promote social support and parenting skills in parents with an intellectual disability	no	no specific outcome defined, no C	no		no		partial		no		no		no		no		no	they could not determine quality/risk of bias for most of the studies with the tool selected	no		n/a		n/a		no		no		n/a		no		.	no	no	no	partial	no	no	no	no	no	no	n/a	n/a	no
	Williams	2018	A systematic review of mental health and wellbeing outcomes of group singing for adults with a mental health condition	yes		yes	PROSPERO	yes		no	didn't provide search terms (only examples in method)	no	additional authors only reviewed extracted data	no		no		no	not enough information on intervention design/intensity	yes		no		n/a		n/a		yes		no		n/a		yes			yes	yes	yes	no	no	no	no	no	yes	no	n/a	n/a	yes
	Siette	2017	Effectiveness of befriending interventions: a systematic review and meta-analysis	no	no O defined	no		yes		partial	didn't search trial/study registries, experts? didn't search grey literature	yes		yes		yes		no	sample characteristics lacking	yes		no		yes		no		no		yes		no		yes			no	no	yes	partial	yes	yes	yes	no	yes	no	yes	no	no
	Clatworthy	2013	Gardening as a mental health intervention: a review	no	no C or O defined	no		no	didn't define eligible study designs	partial	didn't search trial/study registries, >24m old, ?? expert consultation?	no	not reported	no		no		no	didn't clearly describe intervention conditions or the comparator/CGs	no		no		n/a		n/a		no		no		n/a		no			no	no	no	partial	no	no	no	no	no	no	n/a	n/a	no
	Picton	2020	Experiences of outdoor nature-based therapeutic recreation programs for persons with a mental illness: A qualitative systematic review	yes	thorough for the review design/goals	no	surprising given that they first searched PROSPERO for similar reviews	yes		yes		yes		yes		yes		yes		yes		no		yes		n/a		yes	"confidence"/credibility grading of the evidence	no		n/a		yes			yes	no	yes	yes	yes	yes	yes	yes	yes	no	yes	n/a	yes
	Genter	2015	The contribution of allotment gardening to health and wellbeing: A systematic review of the literature	no	no specific outcome defined, no C	no		no		partial	didn't search reference lists or trial/study registries	no		no	conducted by one researcher, and subsequently updated by a second reviewer (presumably for the second search, not for the included studies)	yes		no	no sample/population characteristics	no	an old tool was used, but the quality/ROB was not clearly reported or integrated into the results	no		n/a		n/a		no		no		n/a		yes			no	no	no	partial	no	no	yes	no	no	no	n/a	n/a	no
	Fortuna	2020	Digital Peer Support Mental Health Interventions for People With a Lived Experience of a Serious Mental Illness:Systematic Review	yes		yes		yes		partial	didn't search trial/regstries, expert?, grey literature?	yes		yes		no		yes		yes		no		n/a		n/a		no		yes		n/a		yes			yes	yes	yes	partial	yes	yes	no	yes	yes	no	n/a	n/a	no
	Fuhr	2014	Effectiveness of peer-delivered interventions for severe mental illness and depression on clinical and psychosocial outcomes: a systematic review and meta-analysis	yes		no		yes		no	didn't provide keywords	yes	although 1 reviewer initially screened titles to eliminate papers not on MH disorders	yes		no		no	not enough information on samples	yes		no		yes		yes		yes		yes		yes		yes			yes	no	yes	no	yes	yes	no	no	yes	no	yes	yes	yes
	White	2020	The effectiveness of one-to-one peer support in mental health services: a systematic review and meta-analysis	yes		yes		no	not justified/explained	no	didn't provide keywords/search term structure; didn't search trial/registries, expert?, grey literature?	yes		yes	25% checked	no		no	not enough detail about sample	yes		no		yes		no		no		yes		no		yes			yes	yes	no	no	yes	yes	no	no	yes	no	yes	no	no
																																				COUNT: partial	0	6	0	36	0	0	0	8	3	0	0	0	1
																																				COUNT: no	27	42	30	4	30	43	48	25	25	50	0	5	29
																																				COUNT: n/a	0	0	0	0	0	0	0	0	0	0	44	44	0
																																				TOTAL	27	48	30	40	30	43	48	33	28	50	44	49	30
																																				Percent not meeting criteria	100	87.5	100	10	100	100	100	75.7576	89.2857	100	0	10.2041	96.6667
	Data not extracted
	Coren	2010	Parent training support for intellectually disabled parents	.																																.	.	0	0	0	0	0	0	0	0	0	0	0	0
	Coren	2018	Parent training interventions for parents with intellectual disability	.																																.	.	0	0	0	0	0	0	0	0	0	0	0	0
	Newlin	2015	Social participation interventions for adults with mental health problems: a review and narrative synthesis	no	very vague criteria given focus on adults (not adult criteria defined), no C defined,	no		no		partial		no		no		no		no		yes		no		n/a		n/a		no		no		n/a		no		.	no	no	no	partial	no	no	no	no	yes	no	n/a	n/a	no
	Spain	2017	Family therapy for autism spectrum disorders	yes		yes		yes		yes		yes		n/a		yes		n/a		yes		yes		n/a		n/a		n/a		n/a		n/a		yes		.	yes	yes	yes	yes	yes	n/a	yes	n/a	yes	yes	n/a	n/a	n/a
	Spain	2015	Group social skills interventions for adults with high-functioning autism spectrum disorders: A systematic review	no	no comparator	no		no		partial		no		no		no		partial	didn't report follow up period	no		no		n/a		n/a		no		no		n/a		no	only reported their funding	.	no	no	no	partial	no	no	no	partial	no	no	n/a	n/a	no
	Pitt	2013	consumer-providers of care for adult clients of statutory mental health services	.																																.
[truncated: 10 more columns]

## Sheet: lists
Type of review		Keywords/ Search strategy		Review Design structure		Study design types		SCC primary category		Transitions		Overall effects		overall ROB		Sample heterogeneity		Simple
scoping review		in text only		PICO		not eligible		capacity		younger adult		positive effect (>=60% of studies had positive effect)		low quality/high ROB		yes or unclear: broad age range and multiple diagnoses and disability severity and participants in studies had comorbidities		Yes
rapid review		in appendix/ supplementary materials		SPIDER		eligible, not included		environment		older adult		negative effect (>=60% of studies had negative effect)		moderate quality/ROB		no: restricted age range (e.g., adults only) and consistent diagnoses across studies and no/minimal comorbidities		unclear
SR with narrative synthesis		not provided		STARLIGHT		eligible, included		participation		yes		null effect (>=60% of studies had null effect)		high quality/low ROB				No
SR with meta-analysis				PCC		eligibility unclear		capacity and participation		no		inconsistent effect (no effect direction to meet >=60% threshold)		not applicable				N/A
SR with meta-qual/ethnography				not clear								unclear		not clear		Methods heterogeneity		NR
Systematic Review												effects not reported		not reported		yes or unclear: multiple intervention types and inconsistent follow-up time-frames and no high quality study designs included (i.e., RCTs)		Ineligible
Cochrane Review												not applicable				no: restricted intervention types/targets and consistent follow up time-frames and consistent and/or high quality study designs included (i.e., RCTs)
umbrella review

## Sheet: SR summary stat calculations
Review		sample w/ ID	workers	Family	Other	Male %	Male, n	Female, n	Age, min	Age, max	Age, m(sd)	Intervention type/name	trial type	disability notes	Social skills/behaviours			Social functioning IPR, SELSA, QSQ, WFIRS
Atkinson-Jones 2018	Paper	N				%	n	n	Min	Max	mean (sd)				positive effect for one or more measure	negative effect for one or more measure	null effect for one or more measure	positive effect for one or more measure	negative effect for one or more measure	null effect for one or more measure
	gantman 2012 IG	9				55.6	5.004	3.996
	gantman 2012 CG	8				75	6	2							yes	no	no	yes	no	no
	Ashman 2017	19				68	12.92	6.08							yes	no	yes	no	no	yes
	Hillier 2007	13				84.6154	11	2							yes	no	no	yes	no	yes
	Hillier 2011	49				86	42.14	6.86							n/a	n/a	n/a	yes	no	no
	Howlin-Yates 1999	10				100	10	0							yes	nr	nr	yes	nr	nr
	Laugeson 2015	22				76	16.72	5.28							yes	no	no	yes	no	no
	Liu 2013	14				72	10.08	3.92							yes	nr	nr	n/a	n/a	n/a
	McVey 2016	56				81	45.36	10.64							yes	no	no	yes	no	yes
	Turner-Brown 2008	11				91	10.01	0.99							no	no	yes	n/a	n/a	n/a
	White 2015	5				100	5	0							yes	yes	no	n/a	n/a	n/a
	TOTAL						174.234	41.766						YES total	8	1	2	6	0	3
														NO total	1	6	5	1	6	3
														Total	9	7	7	7	6	6
														Percent yes	88.8889	14.2857	28.5714	85.7143	0	50
Bigby 2018	Ward 2012	31				nr	nr	nr	nr	nr		mixed methods
	Ward 2013	31	11						nr	nr
	Heslop (2005)	34	15	46	42				nr	nr		qual
	Harlan-Simmons et al. (2001)	3							"older"	nr		qual
	Bigby and Wiesel (2015)	26							nr	nr		qual
	Lante et al. (2011)	2							nr	nr		mixed methods
	Craig and Bigby (2015)	5							45	nr		action
	Stancliffe et al. (2015)	29							nr	nr		mixed methods
	Bigby et al. (2014)	24							nr	nr
	Wilson et al. (2015)	same sample as Stancliffe; Bigby 2014; Wilson 2013							nr	nr
	Wilson et al. (2013)	same sample as Stancliffe; Bigby 2014; Wilson 2013							nr	nr
	Tedrick (2009)	3							65			qual
	Harada et al. (2011)	nr							nr	nr		cross sect
	McConkey et al. (2013)	nr (athletes from 4 teams in each of serbia, polant, ukraine, germany and Hungary)							nr	nr		qual
	Darragh et al. (2016)	5	nr	nr					21	27		qual
	Stickley et al. (2012)	50	10	20					nr	nr		qual
	McClimens and Gordon (2009)	nr							nr	nr		qual
	TOTAL	188	36	66
Bourne 2018	Dent-Brown 2006	25
	Folostina 2015	9
	Gardner-Hynd 2010	4
	Grainger 2011	12
	Hackett 2014	12
	Holloway 2011	68
	Jaaniste (2008)	5
	Jacques (2011)	45
	Lahad (1999)
	McAllister (2015)	5
	Orkibi (2014)	5
	Ramsden 2010	6
		196
Bundock	Gaylord-Ross 1984		3				3	0	17	20	18.3 (1.25)
	Liu 2013		14				10	4	18	40	24.6(10.4)
	Nind 1996		6						27	36	nr
	Carminati 2007		19				15	4	nr	nr	38.3, 39.7 (8.9; 13.4
	Samuels and Stansfield 2012		4				4		17	32
			46				32	8
Exell	Chandler	1					1	0	25
	mueser	41					24	17
	valenti-Hein	26					13	12
	Ward X2	31					17	14
	Cunningham	38					30	8
		137					85	51
													ROB
											M	SD	unknown	high
Feng	Cao 2008	150					90	60			38.8	9.1	3	1	4	2
	Cao 2003	120					72	48			39	9	5	0	5	4
	Huang	41					27	14			43.9	11.3	5	1	6	3
		36					24	12			44.1	12
	Lv 2010	46					26	20			48.3	4.21	3	1	4
		43					25	18			17.6	4.85
	Sheng	82					82	0			4	10	4	1	5
	Shi	39					28	11			37	8.28	4	1	5
		37					25	12			36.34	10.14
	Tang	158					96	62			41	0	3	0	3	1
	Tian	26					18	8			48.25	1.35	5	1	6
		26					17	9			48.21	1.45
	Tian	80							18	60			6	1	7	1
	Wang 1994	48					0	48			40	7	6	0	6
	zhao	30					14	16			37.17	7.15	4	1	5
		30					13	17			38.03	5.9
		962					544	338
Ratti															Community participation	Social network	Quality
	Magito-McLaughlin 2002	8					5	3	37	41	nr		quasi-experimental matched-group comparison of PCP vs control	mod=profound ID, ASD	5	2	10/25	USA
	Malette	3					1	2	25	27		PCP in home/community setting	qualitative and observation		4		moderate	Canda
	Robertson	93					nr	nr			40.25(12.4)		No control group, pre-post design		5	4	12/25	UK
	Espiner	10					5	5			nr	PCP in reidential group home	qualitative		n	2	Moderate	NZ
	Hagner	6					nr	nr	16	22	nr	transition school to adulthood	qualitative	2 mild ID, 3 mod ID, 1 sev ID	n	3	Moderate	USA
	Parley	nr					nr	nr				PHP in hospital nursing care	nurse observation		n	1	Weak	UK
		120					11	10
Bigby 2012 SR																mod-profound ID
	Carr 1999	3					2	1	14	39		Positive behaviour support	case study	ID with some symbolic communication		3
	Jensen 2001	1					1		35	35		multicomponent intervention - functional behaviour Ax, monthly review, person-centred plan, peer review 4-hour daily community outings, functional communication training	case study	sev nr		1
	McClean 2007	5					3	2	nr	nr		positive behaviour support	pre-post no control gp	2 mod, 2 sev 1 mild ID		4
	Magito-McLaughlin 2002	1					1	0	nr	nr		intensive intervention w/ PBS and PCP	case study	nr			1
	Mansell 2001	13					nr	nr	13	29		multifaceted demonstration projec person centred plan with active support focused on home/community activity engagement	descriptive pre-post/longitudinal	sev ID		13
	DiTerlizzi 1994	1						1	40	40		longitudinal case study	case study	sev ID		1
	Lowe 1996	30					nr	nr	nr	nr		two community services for ppl w ID, incl intensve tailored support	cross-sectional	nr			30
	Saxby 1986	10					3	7	24	58		nature of activities/interactions when visiting local amenities (e.g., shops/cafes) with staff	cross-sectional	sev-profound ID		10
	Bird 2000	5					5					move from congregate care to specialist service, behaviour support plan	pre=post no control gp	3 mild ID, 2 mod ID, 1 sev ID	residential
	Dagan 1996	4					4	0	33	57		move from hospital to specialist small group home	Non RCT with CG	2 mod, 2 sev ID	residential	32
	Felce 2000	34					nr	nr	21	55		comparison of residential settings	cross-sectional b/n groups	sev ID	residential
	Golding 2005	12					12	0				move from NHS institution to group homes	cross-sectional	12 mild-mod ID	residential
	Robertson 2004	25							18	65		comparison of models of resident congregation	cross-sectional	sev nr	residential
	Young 2006	30										Comparison of instituion vs small gp homes	cross-sectional	mod-sev ID	residential
		69					10	11
Fernandez-Sotos
	Park 2011	64					nr	nr	nr	nr	nr	SST-VR	RCT of SST-VR vs SST-TR (TR not defined - assume Typical Reality?!)
	Rus-Calafell 2012	1					nr	nr	nr	nr	nr	Soskitrain	case study, pre-post
	Rus-Calafell 2014	12					nr	nr	nr	nr	nr	Soskitrain	pre-post, no CG
	Humm 2014	96					nr	nr	nr	nr	nr	Job Interview Training with Molly Porter	RCT vs waitlist
	Peyroux 2016	2					nr	nr	nr	nr	nr	RC2S	pre-post, no CG
	Adery 2018	16					nr	nr	nr	nr	nr	MASI-VR	pre-post, no CG
		191
Howarth															EFFECTS
	Broer 2011	186					nr	nr	nr	nr	nr	ind/gp meetings/interventions, monitoring	mixed methods	nr	No effect on social contacts/network, but reported to be less lonely	Netherlands
	Huges 1999	4					nr	nr	nr	nr	nr	befriending intervention	case study	nr	slight increase in network size for one person only	UK
	Lowe 1991	196					nr	nr	nr	nr	nr	planning/support	Non-RCT w CG,	nr	low proportion in contact with friends with little change during study.	Wales
	McConnell 2008	nr					nr	nr	nr	nr	nr	australian supported learning program for mothers	Non-RCT, no CG	nr	positive effects on mothers social relationships and wellbeing	Australia
	McGaw 2002	nr					nr	nr	nr	nr	nr	group sessions focused on raising social awareness and enhancing interpersonal communications/listening	Non-RCT, IG vs CG (CG condition not defined	nr	64% of EG had positive change in relationships, wtih no change in CG	England
	Ouellette 1994	nr					nr	nr	nr	nr	nr	alteration to activity patterns to increase social network size	pre-post, no CG	nr	social network size = average of 10.6 to 15.8 nonpaid contacts pre-post	USA
	Robertson 2006	nr					nr	nr	nr	nr	nr	person centred planning	pre-post, no CG	nr	52% increase in social networks, incresaed contact with ppl in social network	England
	Ward 2012	31					nr	nr	nr	nr	nr	social skills training for healthy meaningful relationships	pre-post, process evaluation,	nr	positive effect on social network size	USA
		417													5/9 had positive effects
Louw
	Bota 2014	46							11	46		physical activity/sports participation	mixed methods
	Bould 2018	16							18	64		dog walking programme to facilitate convivial encounters	mixed methods
	Cihak 2014	4							21	23		communication skills: email use	case, multiple baseline/probe
	Davies 2015	5							21	23		communication skills: using accessible interface for Facebook	case, multiple baseline/probe
	Gilson 2016	3							18	26		social skills training with covert coaching	case, multiple baseline/probe
	Gibson 2018	5							18	21		social skill training: video‐based instruction ONEder App (SpecialNeedsWare, 2016) on the individualized employment‐related social behaviours (ERSB)	case, multiple baseline/probe
	Iconaru 2014	10							18	20		training module for developing social and civic competencies	pre-post, no CG
	Schneider 2016	76							17	31		transition and social skills: Community Employment and Education (ACEE)	mixed methods
	Shpiegelman 2014	58							18			social media use	mixed methods
	Walsh 2018	7							19	22		Walker Social Skills curriculum (ACCESS program)	case, multiple baseline/probe
	Wilson 2017	10							19	48		structured social group participation	qualitative
		240
								25th	18	22.25
								75th	19	42.25
													mixed methods	4
													case, multiple baseline/probe	5
													pre-post, no CG	1
													qualitative	1
Ma 2019														Capacity Ax	Capacity effect	Participation Ax	Participation effect	QoL Ax	QoL effect	Symptoms Ax	Symptoms effect
	Hasson-Ohayon 2007	210							nr			social skills training and psychoeducation	vs TAU			MSPSS	No effect on isolation
	Silverman 2014	96							n			psychoeducation using musical therapy	vs active treatments			MSPSS	mixed effects: only positive effect b/n music education vs music w/out education on friendship
	Boevink 2016	163							n			supported socialisation: Toward Recovery, Empowerment and Experiential Expertise (TREE)	vs TAU			de Jong-Gierveld Loneliness Scale	no effect on loneliness
	Zang 2014	30							28	80		narrative exposure therapy vs narrative exposure therapy revised	vs waitlist			MSPSS	positive effect for both treatment groups
	Zang 2013	22							37	75		narrative exposure therapy vs narrative exposure therapy revised	vs waitlist			MSPSS	no effect b/n groups
	Gawrysiak 2009	30							18	nr		behavioural activation vs no Rx CG	vs inactive CG			MSPSS	no effect b/n groups
	Conoley 1985	57							n			cognition (reframing) vs waitlist CG	vs waitlist			UCLA loneliness scale; Causal Dimensions Scale	no effect
	Bjorkman 2002	77							19	51		social skills training vs TAU	vs TAU			abbreviated ISSI	no effect
	Mendelson 2013	78							14	41		cognition (home visit and Mother and Babies cours) vs TAU	vs TAU			ISEL	no effect
	Kaplan 2011	300							n			supported socialisation: peer support	vs waitlist			MOS-SSS	no effect
	Rotondi 2005	30							14	nr		psychoeducation	vs TAU			informational and emotional support subscales of Krause and Markindes instrument	no effect
	O'Mahen 2014	83							18			psychoeducation and supported socialisation (Netmums Helping with Depression)	vs TAU			Social Provision Scale	no effect
	Interian 2016	103										psychoeducation and changing cognitions	vs inactive CG			family subscale of MSPSS	positive effect: increase in perceived family support
	Atkinson 1996	146										psychoeducation	vs waitlist			social network schedule (SNS)	increase in SNS size and confidants	measured, tool not listed	nr	measured, tool not listed	nr
	Hasson-Ohayon 2014	55							21	62		SCIT	vs active control (social mentoring only)			SFS (socio-engagement and interpersonal-communication subscales of the Social Functioning Scale)	positive effect on engagement, but not interpersonal communication
	Boen 2012	138										supported socialisation in senior centre group program	vs waitlist			Oslo-3 Social Support Scale	positive effect for TG vs CG
	Solomon 1995	same as other solomon study										supported socialisation	vs active control			family/social contacts; Pattison's Social Network Scale	no effect on social networks
	aberg-wistedt 1995	40										psychoeducation/social skills training w intensive case managemer	vs TAU			number of people in social life	positive effect (increase in social network for IG, decrease for CG)
	Stravynski 1982	22							22	57		social skills training	vs active control			objective social isolation subscale of SSIAM	no effect (both groups had lower isolation)
	Terzian 2013	357								45		supported socialisation/social network intervention	vs TAU			social network size	positiive effect on social network size for IG
	Solomon 1995	96										supported socialisation and case management	vs active control			Pattison's Social Network	No effect on social networks
	Marzillier 1976	21							17	43		social skill training with Systematic Desensitisation VS social skills training vs waitlist	vs active control AND waitlist			Revised-Social Diary and Standardised interview Schedule	positive effect on social contacts vs waitlist CG but not b/n IGs
	Rivera 2007	203										supported socialisation with peer support vs non-peer support vs TAU	vs active control and TAU			modified Pattison Network Inventory	positive effect on social contacts
		2357						25th	17.25	44.5
								75th	21.75	65.25
Pallathra 2019	Baker-Ericzén (2017)	8										Supported Employment, Comprehensive Cognitive Enhancement, and Social Skills (SUCCESS)
	Bölte (2002)	10										--
	Bonete (2014)	100										Interpersonal problem solving for workplace adaptation program
	Cunningham (2016)	30										Relationship Enhancement
	Eack (2013)	54										Cognitive Enhancement THerapy
	Eack 2018	18										Cognitive Enhancement THerapy
	Eckman 2015	18										CBT w visualisation
	Faja 2008	10										--
	Faja 2012	13										STAART
	Fullerton 1999	23										Putting Feet on my dreams
	Gantman 2011	17										PEERS-YA
	Golan	31										--
	Hesselmark	68										CBT
	Hillier 2007	49										Aspirations
	Hillier 2011	13										Aspirations
	Howlin 1999	10										--
	Kandalaft 2012	8										VR Social Cognition Training
	Kiep 2014	50										Mindfulness based therapy for ppl on the Autism Spectrum
	Koch 2014	31										Dance movement therapy
	Koegel 2013	3										--
	Koegel 2015	5										--
	Koegel 2016	3										--
	Koehne 2015	51										Imitation and Syncrhonisation based dance/movement
	Laugeson	22										PEERS-YA
	Lovett 2014	3										--
	Mason 2012	2										--
	McGillivray 2014	32										Think Well, Feel Well and Be Well
	McVey 2016	53										PEERS-YA
	Morgan 2014	24										Interview Skills curriculum
	Palmen 2008	9										--
	Pugliese 2013	5										Problem Solving Skills 101
	Retherford 2015	nr										Camp Campus
	Saban-Bezalel 2015	51										--
	Sizoo 2017	59										CBT and Mindfulness-based stress reduction
	Smith 2014	26										VR job interview training
	Spain 2017	14										Group CBT
	Spek 2013	41										MBT-AS
	Strickland 2013	22										JobTIPS
	Trepagnier 2011	16										--
	Turner-Brown (2008)	11										Social Cognition and Interaction training for HFA Adults
	White 2016	8										Brain-Computer interface for ASD
			1021
Tobin 2014	Gantman 2012	17				56	9.52	7.48			19	PEERS
	Hillier 2007	13				84.6	10.998	2.002	18	23	19	Aspirations
	Howlin and Yates 1999	10				100	10	0	19	44	28.4	Social Skills Group
	Jantz 2011 - Quant component	35				68.6	24.01	10.99	24	77	68.6	Support Group
	Jantz 2011 - qual component											Support Group
	Sperry 2005	18				94.4	16.992	1.008	22	49	34	TEACCH group members
	Garcıa-Villamisar 2010	71				58	41.18	29.82	17	39	31.49	Leisure program
		164					112.7	51.3
								25th	18	39
								75th	22	49
Takahashi	Koch 2015	31					23	8	16	47	22	Fixing the mirrors	cohort	IQ>85
	Koehne 2016	55					32	23	18	55	32.7	fostering social congnition through imitation and synchronization-based dance	Controlled study	IQ>85
	Hildebrand 2016	78					63	12	14	53	22.5	"we dance and find each other"	cohort	IQ<70
	Mastrominico 2018	57					44	12	14	52	22.5	Dance Movement therapy	RCT	IQ<70
		221					162	55
								25th	14	50.75	22.375
								75th	16.5	53.5	25.05
		Mentees			Mentors
Walker 2013	Armstrong 1995				16
	Besio 1993				30
	Carlston 2001		6		6
	Chinman 2008		34		59
	Colson 2009		8		13
	Davidson 2001	21
	Dixon 1994		3
	Doherty 2004		8		2
	Fisk 2000				2
	Gates 2007				15
	Grant 2010		16		14
	Mancine 2005, 2009				15
	Manning 1996				16
	Meehan 2002				10
	Moll 2009		6		6
	Mowbray 1996				16
	Paulson 1999999		4		4
	Pudlinski 1998, 2001				3
	Richard 2009				5
	Salyers 200009	14	16
	Silver 2004				12
	Straughan 2006	19	19
	Truman 2002	34	18
	Yuen 2003	34			3
	Mowbray 1998				11
		122	138	0	258
		380
		Mentees			Mentors
Nguyen 2020	Ames 2016	23			23				18	27
	Ashburner 2018	11			7				17	30
	Curtin 2016	9			9				19	33
	Gillespie-Lynch 2017	30			0				20	24
	Hamilton 2016				7				21	30
	Hotez 2018	24			2				17	28
	Martin 2017	12			12
	Ness 2013	3			3				19	25
	Roberts 2017	9			9				19	33
	Siew 2017	10			10				17	20
		131			82
		213						25th	17	25
								75th	19	30
Maujean 2015	Berget 2008, 2011	90												psychiatric disorders
	Chu 2009	30												schizophrenia
	Pedersen 2012	29												depression
	Villalta-Gil 2009	21												schizophrenia
		170
Lindsay 2019
Mechling 24 2010	Mechling 24 2010	3				33.3333	1	2			19	Simulation - computer based video instruction to ride city bus	case study, multiple probe	moderate ID	USA
Courbois 26 2013	Courbois 26 2013	10				40	4	6			22	3D VIDIA VIRTOOLS	Non-random controlled study	Down syndrome	UK
Davis 41 2014	excluded b/c only navigation within residential setting
Mengue-Topio 31 2011	Mengue-Topio 31 2011	18			18	nr	nr	nr			29.3	3D VIDIA VIRTOOLS	NRCT	ID with non disabled CG	France
Purser 37 2015	Purser 37 2015	50				nr	nr	nr			19	VR environment maze	non-random controlled study	Down Syndrome	UK
McMahon 29 2015	McMahon 29 2015	4				50	2	2			22	location=based augmnented reality navigation using google	case study, multiple probe	ID and ASD	USA
McMahon 30 2015	McMahon 30 2015	6				66.6667	4	2			21	google maps navigation	case study, multiple probe	ID	USA
Smith 27 2017	Smith 27 2017	3				66.6667	2	1			23	iphone app combining google maps w augmented reality for RT navigation prompts	case study, multiple probe	ID	USA
Gomez 45 2014	Gomez 45 2014	18				61.1111	11	7			24	Apps/PDAs - AssisT-OUT adapts to user in route calculation, instructions and interface design	mixed methods	cognitive disability	Spain
Stock 42 2011	Stock 42 2011	1				100	1	0			19	Apps/PDAs - discovery desktop and visual assistant apps	case study, multiple probe	down syndrom	USA
Davies 33 2010	Davies 33 2010	23				39.1304	9	14			32	Apps/PDAs - wayfinder integrated GPS software	RCT	ID	USA
Mechling 25 2011	Mechling 25 2011	3				0	0	3			21	Apps/PDAs - PDA with prompts	case study, multiple probe	Mod ID	USA
Kelley 20 2013	Kelley 20 2013	4				50	2	2			22	Multimedia - digital photographs of landmarks to navigate using video iPod	case study, multiple probe	IDD	USA
		143
						48	36	39		min	19	min: 18, max: 32		USA	8
										max	32			UK	2
										Q1	20.5			spain/france	1 each
Seewooruttun 2014
Campbell 2003	Campbell 2003	274	student teachers	australia									non-RCT pre-post, no CG
MacDonald 1999	MacDonald 1999	168	students	canada									within pre=post
Melville 2006	Melville 2006	201	nurses	uk									3 group, incl CG
Rae 2011	Rae 2011	40	teachers	uk									within pre=post
Wong 2008	Wong 2008	45	residential staff	honk kong									non-RCT with CG
Bailey 2001	Bailey 2001	57	police officers	uk									non-RCT, CG (?)
	Adler 2005	173	optometrists	uk									non-RCT, CG (no practical Rx)
	Freudenthal 2010	80	healthcare students	usa									mixed
	Hall 1996	28	medical students	uk									within pre=post
	Hall 1999	92	psychology undergrads	canada									three group comparison, incl CG
	Iacono 2011	241	students	australia									mixed
	Kobe 1995	37	psychology undergrads	usa									within pre=post
	Li 2013	100	college students	china									nonRCT with CG
	Nosse 1991	31	students	usa									non-RCT pre-post, CG
	Rimmerman 2000	139	students	israel									non-RCT gropu comparisons
	Rober 1990a and 1990b	369	volunteers	usa									within pre-post
	Sharma 2006	63	medical students	usa									qualittive
	Tracy 2008	128	medical students	australia									mixed
	Varughese 2010	360	general population	uk									non-RCT, CG
	Varughese 2011	187	general population	uk									non=RCT CG
	Walker 2013	925	general population	uk									non-RCT active CG
		3738
	Clinicians or clinical trainees	802		hong kong/china	2							mixed methods	3
	police officers	57		usa	5							qualitative	1
	other students	511		canada	2							non-RCT with CG	12
	general population, volunteers	1841		uk	8							non-RCT, no CG (pre-post)	5
	teachers/trainee teachers	314		australia	3								21
	residential staff	45		israel	1
		3570			21
Bondar 2020
	Heller 2004	89				67.4157	60	29	30	53	39.72	exercise and health education program, 3 X 1 hr per week	RCT, CG: no training	Down syndrome and mild-mod ID
	Marks 2013	67				47.7612	32	35	30	64	45.2	community based organisation delivering 1hr X3 per week health education program	RCT, CG: lag	mild-mod ID
	Melville 2015 and Matthews, 2016	102				50.9804	52	50	30	54		community-based walking intervention "Walk Well"	RCT, CG: no Rx	mild, mod and sev ID
	Perez-Cruzado 2016	40					34	6	18	65	35.86	multimodal intervention of PA and education	non-RCT, no CG	mild ID
	Tomporowski 1987	65					nr		15	39		Physical fitness group and Attention CG who received speical academic and social skills education program. Both groups received receptive language training	RCT, CG: placebo tablets	mod-sev ID
	Tomporowski 1985	50							15	38		physical activity group (running/jogging, callisthenics, circuit training) 3 h daily 5 days week, plus training in social skills and supplements	RCT, CG: placebo tablets	sev ID
	Lante	2							21	22		creating a sporting chance program: exercise, sports and active recreation in community setting	case study	mild ID
	Lynnes 2009	4							25	38		Special Olymipics participants in BC, Canada	case study	nr
		419
								25th	17.25	38	37.79
								75th	30	56.5	42.46
Hutzler 2010
	Temple 2007	9	31									day-care centre
	Shapiro 2003	147					80	67	21	70	33	Special olympics participation	cross-sectional	not defined
	Harada 2009	579		1307		64	370.56	208.44			25	Special olympics participation	cross-sectional	not defined
	Dykens & Cohen	104					54	50			22	Special olympics participation	cross-sectional	IQ mean 59
	Farrell 2004	38					21	17			32.7	Special olympics participation	qual	Q<70
	Frey 2005	12					7	5			37	Special olympics participation	qual	mild IQ
	Carmeli 2008	62					8	23	47	67	56.5	exercise group	non-RCT, CG	not define
	Riggen 1993	72					72		40	80	55	special olympics: unified vs segregated vs control	non-RCT, CG	no defined
	Heller 2004	53					24	29	30	54	39.7	exercise programme including health & nutrition education	RCT, CG: TAU	mild-mod ID
		1067					636.56	399.44
								25th	27.75	63.75	30.775
								75th	41.75	72.5	43.525
Tint 2017
	Glidden 2011	34		29			23	11	12	49		traditional segregated SO participation	Cross-sectional	ID sev not defined	USa
	Riggen 1993	75					75	0	18	40		traditional SO basketball	NRCT	not defined	usa
	Hassan 2012	25	25	4	50		nr				nr	unified SO participation	QL		serbia, poland, ukraine, germany and hungary
Valkova 1996 T	Valkova 1996	39					39	0	14	44		traditional segregated SO participation	Cross-sectional	not defined	Czech republic
Valkova 1998 T	Valkova 1998	37					nr				25	traditional segregated SO participation	Cohort study	not defined	Czech republic
Werner 2015 T	Werner 2015	8		18			3	5			21	traditional segregated SO participation	QL		Israel
Marks 2010	Marks 2010	56	59				56	0			32	unified SO participation	CS	nr	usa
Farrell 2004	Farrell 2004	38										SO participation (not clear if unified/traditional)	QL		canada
Ghasemia 2012	Ghasemia 2012	76					45	31	22	24		SO participation (not clear if unified/traditional)	nrct, cg		iran
Goodwin 2006	Goodwin 2006	0		18								SO participation (not clear if unified/traditional)	QL		canada
Harada 2009	Harada 2009	836		471			836	0			25	SO participation (not clear if unified/traditional)	Cross-sectional		usa
Weiss 2008	Weiss 2008	49					30	19	17	45		SO participation (not clear if unified/traditional)	case series		canada
Weiss 2003	Weiss 2003	97					64	33	9	43		SO participation (not clear if unified/traditional)	cross sectional		canada
Wilhite 1992	Wilhite 1992	145					69	76	19	28		SO participation (not clear if unified/traditional)	cross sectional		usa
	McConkey 2013	5	5	6	11							unified SO participation	QL		serbia, poland, ukraine, germany and hungary
	Rosegard 2001	80					48	32				unified SO participation	nrct, cg	nr	usa
	Wilski 2012	221					nr					unified SO participation	QL	nr	serbia, poland, ukraine, germany and hungary
	Tedrick 2009	3					2	1	30	50		SO participation (not clear if unified/traditional)	QL		usa
		1824	89	546	61		1290	208
																7
								25th	13.5	37	24				USA	4
								75th	19.75	46	26.75	Cross sectional	6		Canada	2
												Case series	2		Czech republic	1
												Qualitative	7		israel	1
												NRCT	3		iran	3
													18		serbia, poland, ukraine, germany and hungary	18
Hallett 2019
	Elliott 1994	6					nr		nr				within subject, pre-post
	Garcia-Villamisar 2010	71					nr		nr				NRCT, waitlist control
	Mateos-Moreno 2013	16					nr		nr				NRCT, CG
		93
Firth 2015
Abdel-Baki 2013	Abdel-Baki 2013	25									25
Acil 2008	Acil 2008	30									30
Heggelund 2011	Heggelund 2011	25									34
Marzolini 2009	Marzolini 2009	13									45
Scheewe 2013a, 2013b, 2012	Scheewe 2013a, 2013b, 2012	63									30
Heggelund 2012	Heggelund 2012	16									38
Behere 2011	Behere 2011	91									32
Duraiswamy 2007	Duraiswamy 2007	61									32
Manjunath 2013	Manjunath 2013	88									32
Varambally 2012	Varambally 2012	120									33
Battaglia 2013	Battaglia 2013	18									36
		532
										min	25
Firth 2016										max	45
	Bassilios et al. 2014	49									39
	Carpiniello et al. 2013	138									50
	Deighton et al. 2014	40									19.8
	Faulkner et al. 2007	109									46.5
	Firth et al. 2016	28									25.5
	Fraser et al. 2015	101									40.7
	Gorczynski et al. 2010	54									46.7
	Kane et al. 2012	12									43.25
	Klingaman et al. 2014	5388									55
	Sylvia et al. 2009	86									37
	Ussher et al. 2007	120									42.6
	Wynaden et al. 2012	56							19	50
		6181
										min	19.8
Masi 2011			COUNTRY	ES (95%CI)						max	55
	Petryshen 2001	36	canada	-0.59 (-0.88, -0.30)		39	14.04	21.96	18	65	43	single group pre-post
	Sorenson 2003	9	usa	-4.81 (-7.09, -2.53)			0	9	26	45	33	NRCT
	Fokkema 2007	52	Netherlands	0 (-0.55, 0.55)		60	31.2	20.8			67	NRCT
	Rosen 1982	68	georgia - europe	-0.37 (-0.89, 0.15)		20	13.6	54.4	65		70	NRCT
	Conoley 1985	38	usa	-0.32 (-0.96, 0.32)			0	38			20	RCT
	Morrow-Howell 1998	61	usa	-0.09 (-0.59, 0.41)		15	9.15	51.85	61	92	76	RCT
	Williams 2004	200	USA	-0.36 (-0.64, -0.08)		72	144	56			20	RCt
		464					212	252
										min	19.8	Mean min=20, max=76
										max	76
			USAX4, CanadaX1	4
			Canada	1
			Netherlands X 1, Georgia X1						min	18
									max	92
Soundy 2014
	Falkner 1999	3
	Sandel 1982	nr
	Fogarty 2005	6	6						20	42
	Johnstone 2009	27							27	64
	Weissman 2006	23									50
	Leutwyler 2013	16
	Gorczynski 2013	25
	Roberts 2013	8							24	66
	Leutwyler 2012	0	23
	Happell 2012	0	38
	Hedlund 2013	0	8
		108	75
Quirk 2020
	Bizub 27 2003	5	USA				3	2
	Carless 28 2007	4	UK				4
	Carless 29 2004	9	UK				9	0
	Carless 30 2008	11	uk				11	0
	Carless 31 2008	11	nr				11	0
	Carless 32 2012	3	uk					3
	Carless 13 2008	3	uk				3
	Crone 33 2007	4	uk				2	2
	Evans 34 2017	5	UK				4	1
	Faulkner 35 1999	3	UK				2	1
	Graham 36 2017	21	canada				4	17
	Hodgson 37 2011	17	nr				14	3
	Hoffman 38 2013	14	USA				6	8
	Irving 39 2003	nr	UK
	Wardig 40 2013	40	Sweden				21	19
	Yarborough 41 2016	48	USA			36	17	31
		198					111	87
		UK	9
		USA	3
		Canada	1
		Sweden	1
McCann 2019
	Dukes 2009	4		Ireland			2	2	22	23
	Gardiner 2009	60		Ireland			nr	nr
	Garwood 2000	6		Australia			6		12	25
		70
Gonzalvez 2018
	Graff 27	63	usa				30	33			21
	Hayashi 28	34	japan				24	10			30
	Hickson 34	58	usa				29	29			39
	Khemka 29	36	usa					36			34
	Kemka 36	12	usa					12			36
	Lee 30	24	china					24			36
		227					83	144
											mean min: 21, max: 39
Sala 2019				design	quality
	Zylla 1981	3		mb	w				18	30	39
	Penny 1982	49		nr-pp	w				22		15
	Robinson 1984	83		qe	w				16	50	34
	Lindsay 1992, 1994	60		qe	w				17	43	36
	Garwood 2000	6	Australia	nr-pp	w		6		12	25
	Caspar 2001	12		nr-pp	w				28	62
	Wells 2012	28		nr-pp	w				24	59
	Dukes 2009	4	Ireland	mb	w		2	2	22	23
	Foxx 1984	6		mb	w				26	24
	McDermott 1994	99		qe	w						32.6
	McDermott 1999	252		nr-pp	w				16	59
	Mueser 1987	25		cct	w				18	51
	Haseltine 1990	8		mb	w				22	45
	Valentini-Hein 1994	26		cct	m				18	50
	Lumley 1998	6		mb	w				30	42
	Miltenberger 1999	5		mb	w				33	57
	Egemo-Helm 2007	4		mb	w				20	40
	Plaks 2010	10		nr-pp	w				15	24
	Ruston 1994	23		qe	w				23	60
	sheridan 15 2014	5		nr-pp	w				20	49
	Graff 27	53	usa	qe	w		30	33			21
	Hayashi 28	34	japan	cct	w		24	10			30
	Dekker 2015	30		nr-pp	w				11	19
	Cunningham 2016	35		rct	w				18	50
		866
							min	11
			nrct, cg	3			Max	62
			rct	1
			quasi	5
			MB	7
			within, no CG	8
Anderson 2015				24
	Terzian 14 2013	345
	Sheridan 15 2015	107
	Castelein 17 2008	106
	Hasson-Ohayon 16 2014	54
	Villalta-Gil 18 2009	21
		633
Wilson 2014
	McGaw 2002	22					8	14			29-30
	McConnell 2009	42						42			34.1
	Feldman and Case 1999	10					1	9	23	34	30.3
	Feldman et al 1999	10						10	19	39	28
	Llewellyn 2003	45					5	40	22	45	32
	Mildon 2008	24					5	19	20	49
	Brisson 2010	4						4	37	52	42
		157					19	138
Lorenc 2018					control group
	Bonete 2015	100	spain	nrct	nothing	86	86	14			nr
	Cunningham 2014	38	usa	within		79	30.02	7.98			nr
	Eack 2013	14	usa	within		86	12.04	1.96			25
	Gantman 2012	17	usa	rct	nothing	71	12.07	4.93			20
	Gracey 2011	9	uk	within		56	5.04	3.96			31
	Hesselmark 2014	68	sweden	rct	unstructured recreation	55	37.4	30.6			32
	Hillier 2007 - Aspirations	13	usa	within		85	11.05	1.95			19
	Hillier 2011	49	usa	within		85.7143	42	7			21
	Howlin 1999	10	uk	within			10				28
	Kandalaft 2013	8	usa	within		75	6	2			21
	Koegel 2016	3	usa	within			3				21
	Laugeson 2015	22	usa	rct	nothing	77	16.94	5.06			20
	McVey 2016	53	usa	rct	nothing	83	43.99	9.01			20
	Minihan 2007	22	ireland	nrct	unclear	91	20.02	1.98			27
	Newey 2002	5	uk	within			5				nr
	Palmen 2011	12	netherlands	nrct	nothinjg	83	9.96	2.04			21
	Perdue 2016	5	usa	nrct	social skills training with lectures	80	4	1			nr
	Pugliese 2013	5	usa	within			5				21
	Shireman 2016	3	usa	within		67	2.01	0.99			23
	Turner-Brown 2008	11	usa	rct	TAU	91	10.01	0.99			36
	White 2015	5	usa	within			5				24
	White 2016	8	usa	rct	VR social skills training with biofeedback	62	4.96	3.04			20
	Morgan 2014	28	usa	rct	nothing	94	26.32	1.68			25
	Smith 2014/2015	26	usa	rct	TAU	76.9231	20	6			24
	Hillier 2017 - job support	9	usa	within		88	7.92	1.08			22
	Hillier 2012	22	usa	within		82	18.04	3.96			18
	Koch 2015	31	germany	nrct	nothing	74	22.94	8.06			22
	Koehne 2016	51	germany	nrct	movement training focused on dexterity, balance and endurance	63	32.13	18.87			33
	Koegel 2013	3	usa	within			3				22
	Ness 2013	3	usa	within			2	1			22
		653					513.86	139.14		min	18
										max	36
		usa	21
		uk	3	within	16
		germany	2	rct	8
		Netherlands	1	nrct	6
		Spain	1		30
		sweden	1
		ireland	1
			30
Grant 2017
	Bechi 2012	76				65.7895	50
	Bechi 2013	30				46.6667	14
	Bechi 2015	75				57.3333	43
	Choi 2006	34				55.8824	19
	Combs 2007	28				75	21
	Combs 2008					65
	Corrigan 1995					45
	Eack 2009	58				68.9655	40
	Eack 2015	31				70.9677	22
	Garcia 2003	20				70	14
	Gil Sanz 2009	14				50	7
	Gil-Sanz 2014	83				52.2169	43.34
	Gohar 2013	82				80.4878	66
	Hasson-Ohayon 2014					69
	Habel 2010					100
	Horan 2009	31				93.5484	29
	Horan 2011	85				85.8824	73
	Kayser 2006					70.2857
	Mazza 2010					59
	Penn 2000					58
	Popova 2014					66
	Roberts 2014	66				67
	Roncone 2004					65
	Russell 2008					65.325
	Sachs 2012					50.5263
	Tas 2012					51.14
	Taylor 2015	45				100
	van der Gaag 2002	42				50	21
	Veltro 2011					nr
	Wang 2013	43				48.8372	21
	Wolwer 2005					78.0779
Puolakka 2019	Wolwer 2011					68
1
2	Aho-Mustonen 2011	39				89.7436	35	4			m=38.6, m=40.6
3	Pitkanen 2012	311				100	311	0	nr	nr	nr
4	Vreeland 2006	74				44.5946	33	41	22	64	nr
5	Walker 2013	81				90.1235	73	8			m=38, m=35
6	Bradley 2006	50				30	15	35			m=33.6, m=34
7	Giron 2010	50				74	37	13			m=30.9, m=32.1
	Ngoc 2016	59				50.8475	30	29			m=24.9, m=23.7
	Rus-Calafell 2013	31				80.6452	25	6			m=42.4, m=37.5
	Patterson 2003	32				68.75	22	10			m=47.9, m=51.7
	Patterson 2006	240				65	156	84			m=51.2, m=50.5
	Hayes 1995	63				74.6032	47	16			m=36
	Bio 2011	112				64.2857	72	40			m=28.2, m=30.8
		637				63.4223	404	233
											M: 24.9-51.2
Hutchinson 2015
	Elgie 2001	1						1		39	39
	Learning 2006	3					1	2	28	38
	Lovell 1998	1					1			53
	Nind 1996	6					nr	nr	27	36
	Nind 1999	1					1			28
	Samuel 2008	4						4	23	56
	zeedyk 2009a, b	10					6	4	late teens	early 60s
	Forster 2006	1					1			young adult
		27					10	11
Geretsegger 2017			Setting	Comparator
Ceccato 2009	Ceccato 2009	67	in and outpatient	Standard care		61.194	41	26	20	60
Cha 2012	Cha 2012	60	inpatient	Standard care			nr	nr	nr	nr
Chang 2013	Chang 2013	72	inpatient	Standard care		68.0556	49	23			34.4
Fu 2013	Fu 2013	40	inpatient	Standard care		45	18	22			38.3
Gold 2013	Gold 2013	144	in and outpatient	TAU		63.9344	39	22	18	57
He 2005	He 2005	60	inpatient	Standard care		85	51	9			35
Li 2007a	Li 2007a	60	inpatient	Standard care		100	60				32
Liu 2013	Liu 2013	30	inpatient	Standard care		56.6667	17	13			42.9
Lu 2013	Lu 2013	80	inpatient	Standard care		73.75	59	21			24.9
Mao 2013	Mao 2013	90	inpatient	Standard care		48.8889	44	46			35.2
Mohammadi 2012	Mohammadi 2012	96	inpatient	Passive music therapy + standard care; medication only		63.5417	61	35			34.6
Qu 2012	Qu 2012	58	inpatient	Standard care		74.1379	43	15			31.6
Talwar 2006	Talwar 2006	81	inpatient	Standard care		74.0741	60	21	18	64	37
Tang 1994	Tang 1994	76	inpatient	Standard care			nr	nr	nr	nr	nr
Ulrich 2007	Ulrich 2007	37	inpatient	Standard care		54.0541	20	17	22	58	38
Wang 2013	Wang 2013	62	inpatient	Standard care		62.9032	39	23			36.7
Wen 2005	Wen 2005	30	inpatient	Standard care		70	21	9	15	50	nr
Yang 1998	Yang 1998	72	inpatient	Standard care		58.5714	41	29	21	55
		1215					663	331
										min	24.9
										max	42.9
Kamioka 2014
	Chu 2009	30	Taiwan			nr
	Antonioli 2005	30	USA and Honduras			nr
	Jessen 1996	40	USA			nr
	Villalta-Gil 2009	24	Spain			nr
	Barak 2001	20	Israel			nr
	Pedersen 2012	29	Norway			nr
	Carolyn 2000	69	USA			70
		242
Kaltenthaler 2014
	Berkman 2006	92	usa	homeless shelter			92		nr	nr	38
	Berkman 2007	149	usa	outpatient			149		nr	nr	37.2, 40.0
	Carey 2004	408	usa	outpatient		46	187.68	220.32			36.5
	Collins 2011	79	usa	community				79	nr		42.3
	Kalichman 1995	52	usa	outpatient		52	27.04	24.96			39.2
	Katz 1996	27	usa	drop in centre		66	17.82	9.18	22	59	nr
	Kelley 1997	104	usa	outpatient		47	48.88	55.12			33.7
	Linn 2003	257	usa	homeless shelter			257				nr
	Malow 2012 (E-CB intervention)	290	usa	outpatient		45	130.5	159.5			39.6
	NIMH 2006	99	usa	outpatient			99				78%>31
	Otto-Salaj 2001	189	usa	outpatient		46	86.94	102.06			38.4
	Susser 1998	97	usa	homeless setting			97				39%<35 years
	Weinhardt 1998	20	usa	outpatient				20			36
		1863					1192.86	670.14
								two studies with women, 5 studies with men and 5 studies with mixed gender cohort
											mean age Min: 33.7, max: 42.3
Naslund 2015
	Granholm 2012	55					nr	nr	nr	nr	nr
	Alvarez-Jiminez 2013; Gleeson 2014	20
	Kaplan 2014	60
	Kaplan 2011	300
	Pijnenborg 2010	62
	Proudfoot 2012	407
		904
Finkel 2020
	Allan 2015	13	UK
	Chiu 2015	36	Canada
	Griffith 2015	78	USA
	Howells 2009	20	USA
	Stokrocki 2004	3	USA
	Thompson 2016	10	USA
		160
SChepens
	see next tab
Williams 2018	Clift 28 2011
	Petchkovsky 30 2013
	Grocke 21 2014
	Sun 31 2016
	Clift 11 2017
	Fancourt 32 2018
	Williams 29,37 2018
	Bailey35 2002
	Bailey36 2005
	Dingle 20 2013
	Plumb 38 2017
	Shakespeare 39 2017

## Sheet: Schepens 2018 QoL
				intervention category	impact source	Sample w ID	age, min	age, max	age mean	quality		Intervention
			2	existential supports	Table 2	60			55.84	50, 75	non-randomised trial/quasi experimental	Life story work
			5	planning of support	Table 2	62			65	25, 50	case series	future planning for middle aged child w ID
			7	retirement	Table 2 & 3	12	45			50, 75	qualitative	social inclusion after retirement from supported employment
			8	retirement	Table 2	24			57.5	50, 75	pre-post, no control	transition to retirement program
			15	physical activities	Table 2	26			63	75, 100	RCT (CG not described)	6m treadmill intervention
			16	physical activities	Table 2	27	55	77		50, 75	nonrandomized quasi-experimental	6m muscle strengtening and balance training program
			17	physical activities	Table 2	22	54	66		50, 75	nonrandomized quasi-experimental	physical training w focus on balance and muscle strength
			19	retirement	Table 2	5	48	62	56.2	50, 75	qualitative	pathways to active participation in community groups - enabling or constraining factors
			20	existential supports	Table 2	5	55	63		50, 75	case series	life story books and rummage boxes for ID+dementia
			31	existential supports	Table 2	11	60			25, 50	qualitative	collecting and disseminating life story
			34	retirement	Table 2	1			59	0, 25	case series	community membership project
			53	planning of support	Table 2	1			68	0, 25	case series	person-centred care pl anning and essential lifestyle plan to maintain skin integrity
			54	retirement	Table 2	58			57.4	50, 75	pre-post, no control	supporting attendance at mainstream community groups in transition to retirement program
			56	use of cognitive devices, schedules, time aids	Table 2	2				50, 75	case series	circumstances and effects of choicemaking opportunities
			61	physical activities	Table 2 & 3	40	50	80		50, 75	qualitative	preferences for, participation in, facilitators and barriers to physical activity
			62	physical activities	Table 2	150			58.2	75, 100	RCT (CG not described)	combined physical activity and health education
			72	retirement	Table 2	14				50, 75	qualitative	active mentoring
						3713
added to 3.0	Bai 2014	hong kong	2	existential supports	Table 2	60			55.84	50, 75	non-randomised trial/quasi experimental	Life story work
added to 3.0	Bigby 1996	Australia	5	planning of support	Table 2	62			65	25, 50	case series	future planning for middle aged child w ID
added to 3.0	Bigby 2011	Australia	7	retirement	Table 2 & 3	12	45			50, 75	qualitative	social inclusion after retirement from supported employment
added to 3.0	Bigby 2014	Australia	8	retirement	Table 2	24			57.5	50, 75	pre-post, no control	transition to retirement program
added to 3.0	Carmeli 2002	israel	15	physical activities	Table 2	26			63	75, 100	RCT (CG not described)	6m treadmill intervention
added to 3.0	Carmeli 2004	israel	16	physical activities	Table 2	27	55	77	66	50, 75	nonrandomized quasi-experimental	6m muscle strengtening and balance training program
added to 3.0	Carmeli 2005	israel	17	physical activities	Table 2	22	54	66	60	50, 75	nonrandomized quasi-experimental	physical training w focus on balance and muscle strength
added to 3.0	Carmeli 2008	israel	18	physical activities	Table 2	60	47	67	56.5	50, 75	nonrandomized quasi-experimental	physical training
added to 3.0	Craig 2015	Australia	19	retirement	Table 2	5	48	62	56.2	50, 75	qualitative	pathways to active participation in community groups - enabling or constraining factors
added to 3.0	Hamilton 2009	ireland	31	existential supports	Table 2	11	60			25, 50	qualitative	collecting and disseminating life story
added to 3.0	Smith 2013	ireland	53	planning of support	Table 2	1			68	0, 25	case series	person-centred care pl anning and essential lifestyle plan to maintain skin integrity
added to 3.0	Stancliffe 2015	Australia	54	retirement	Table 2	58			57.4	50, 75	pre-post, no control	supporting attendance at mainstream community groups in transition to retirement program
	Treece 1999	usa	56	use of cognitive devices, schedules, time aids	Table 2	2				50, 75	case series	circumstances and effects of choicemaking opportunities
added to 3.0	van Schijndel-Spreet 2014	Netherlands	61	physical activities	Table 2 & 3	40	50	80	65	50, 75	qualitative	preferences for, participation in, facilitators and barriers to physical activity
added to 3.0	van Schijndel-Spreet 2017	Netherlands	62	physical activities	Table 2	150			58.2	75, 100	RCT (CG not described)	combined physical activity and health education
added to 3.0	Wilson 2013	Australia	72	retirement	Table 2	14			57.5	50, 75	qualitative	active mentoring
						520		Min
								Max	55.84
									68
