# Supplementary material for: Interventions for social and community participation for adults with intellectual disability, psychosocial disability or on the autism spectrum: An umbrella systematic review
Source: Front Rehabil Sci. 2022 Aug 19;3:935473. doi: 10.3389/fresc.2022.935473 (PMC9397886; doi:10.3389/fresc.2022.935473)
Supplement: Supplementary Data 2 [file Table_2_v1.xlsx]

## Sheet: Notes
1	Checked sample size and number of studies for Grant	done
2	Updated sample size and number of studies for Ratti	done	update for calculation in local spreadsheet	pending
3	Updated sample size and number of studies for Ma	done	update for calculation in local spreadsheet	pending
4	Add Turner -Brown 2008 to Tobin 2014 for duplication analysis	DONE	update for calculation in local spreadsheet	pending
5	check Sheridan 2015 in Newlin hard-copy paper	pending
6	Additional possible SRs to include: 1. Bickerdike L, Booth A, Wilson PM, et al. Social prescribing: less rhetoric and more reality. A systematic review of the evidence. BMJ Open 2017;7:e013384. 2. Kilgarriff-Foster A, O’Cathain A. Exploring the components and impact of social prescribing. J Public Mental Health 2015;14:127–34.	pending
7	updated sample size and number of studies for Schepens	done
8	Add Carmeli 2008 in Schepens rvw to duplication calculation	DONE
9	add Mueser 1987 in Exell for duplication calculation	DONE
10	add Lumley 1998 to Sala	DONE
11	Butler and Jupp in Gonzalvez are ineligible - number of papers correct in phase 1 spreadsheet, but updated Australia X 0, USA X 4 instead of 5, and total sample = 227 not 287, updated n male/female, and updated n RCTs/NRCTs still need to update/check duplication calculation	done/pending
12	Updated Lindsay sex and sample size stats in Spreadsheet 2	done
13	Check number of studies in Seewoo.... SR is correct in duplicate calculation sheet	pending
	Reference 309 (Nind 1996) was a duplicate of reference 525 so they were merged and extracted ref 309 was deleted	done

## Sheet: lists
Program category	Study design	Disability group(s)	SCC participation type	SCC outcome type(s)	Intervention setting	Format	Mode	Agent	Summary	Simple	quali/ROB
art	Mixed methods	ASD	Social	Capacity	Clinical - inpatient	Individual	face-to-face	Clinician	Integrated (>=1 ppl without disability)	yes	low quality/high ROB/suggestive certainty
animal	Multi-methods	ASD & ID	Community	Participation	Clinical - outpatient	Individual and group	computer based	Community members	Segregated (only for ppl with disability)	no	moderate quality/ROB/preponderant certainty
befriending/social interaction support	Multiple baseline case study	ASD & PD	Others in the community	Capacity and participation	Clinical - primary care	Couple (2 people)	covert	Disabled people/person	Not clear	not clear	high quality/low ROB/conclusive certainty
clinical or health interventions	Not clear	ASD, ID & PD	Social and community	Other	Clinical - in/outpatient not clear	Group (>2 people)	online	None	Both integrated and segregated		not applicable
community group participation	NRCT-No control	ID		Quality of Life	Clinical - other	Not applicable	self-administered	Multiple			not clear
dance	NRCT	ID & PD			Community	Not clear	other - specify in list	Parent/carer			not reported
drama	Qualitative: focus groups	PD			Disability activity setting (e.g., day centre)		telehealth	Peer
environment (e.g., attitudes in the community)	Qualitative: interviews				not reported		unsupervised	Researcher
music	Qualitative: other				Online/telephone		not clear	Sibling
navigation	RCT/quasi-RCT				Post-secondary school education			Social navigator/prescriber
peer support	Systematic review				Residential/home			Staff
positive behaviour support/active support/person centred planning	Descriptive/cross-sectional				School			Teacher
relationships/roles - intimate partners	Case study (not multiple baseline)				Special Olympics			other - specify in list
relationships/roles - parenting	** add more specific methods as relevant				Vocational training/work setting			not clear
social skills/ communication training
sport/physical activity
support for social participation (e.g., social prescribing, loneliness interventions)
support for convivial encounters in community
transition program
vocation-focus

## Sheet: Studies data extraction
			Study design					Sample and recruitment characteristics																							SCC participation partners in intervention									Implementation requirements					Intervention effects
Category	Study First Author, Year	Systematic Reviews including paper	Study design/method	SCC participation type	SCC outcome type(s)	Inclusion criteria	Exclusion criteria	Participant recruitment source/ strategy	Eligible participants, N	Recruited participants, Total N	Participants in IG(s), N	Participants in CG, N	drop-out / LTFU for IG, N	drop-out / LTFU for CG, N	Disability group(s)	Disability severity/notes	sex (% male)	age	Country	Program category	Program name (use this to guide the specific intervention name in the next column, and may need to reorganise program rows)	Intervention name	Brief intervention description	Control group(s) name / description	Intervention setting	Intervention setting - notes	Format	Mode	Agent	Agent - notes	integrated/segregated	People with disability	People without disability	DSW	Family/ informal carers	Other (e.g., colleague)	Intervention duration (weeks/sessions)	Intervention intensity (length of each session, hours)	Intervention content	Intervention costs	Equipment/resources required by intervention providers	Training requirements for intervention providers	Clinical/education background of intervention providers	Function/ capacity needs of intervention participants	Capacity - domain	Effect for each capacity measure/outcome between groups or within groups only if no b/n groups test	Participation domain	Effect for each participation measure/outcome between groups or within groups only if no b/n groups test	Other outcome - domain
1	Bigby 2015	Bigby 2018	Qualitative: other	Social and community	Participation	nr	nr	nr	nr	26	26	0	0	n/a	ID	mild-moderate ID	"mostly male"	nr	Australia	befriending/social interaction support	Convivial encounters: Individual support for positive social interactions with people in mainstream places	Supports for Convivial encounters	Individual support for positive social interactions with people in mainstream places	no CG	Community	in shops and other public facilities	Individual	face-to-face	not clear	not described	Integrated (>=1 ppl without disability)	yes	yes	yes	no	community members	nr	nr		nr	nr	nr	DSWs	nr	n/a	n/a	convivial encounters	Convivial encounters between people with intellectual disability with strangers in community places can be facilitated by support workers. Staff practices included the following: passive monitoring of the encounter where the support worker avoided a direct role in the interaction; acting as an interpreter, assisting both parties in the encounter to communicate by reassuring uncertain members of t…	n/a
1	Heller 2000	Ratti 2016	RCT/quasi-RCT	Community	Participation	ppl w ID aged 50+, or ppl w down syndrome aged 35+	nr	nr	nr	60	38	22	nr	nr	ID	52% mild, 48% moderate	nr	m=56.9	USA	positive behaviour support/active support/person centred planning	Person centred planning	Person centred planning (PCP)	not described	not described	Disability activity setting (e.g., day centre)	day program with vocational emphasis	Individual	face-to-face	not clear	not described	Both integrated and segregated	yes	not clear	not clear	not clear	not clear	nr	nr	not described	nr	nr	nr	nr	nr	n/a	n/a	Inventory for Client and Agency Planning (ICAP; demographic information), Later Life Curriculum Test, Daily Choice Inventory, Goal Attainment completed by participants and direct observation.	– There was a greater increase in choice making from pre to post intervention for participants in the intervention arm compared to the control group F(1–58) = 7.58, p < 0.01, however this was only for two items, “How to decorate your room” and “What job/work you do at the workplace”. – 3.4% of participants in the intervention arm who set goals exceeded expectations of goal attainment, 55.2% met e…	Life Satisfaction Scale
1	Magito-McLaughlin 2002b (book chapter)	Ratti 2016	RCT/quasi-RCT	Community	Participation	nr	nr	nr	nr	8	4	4	nr	nr	ID	moderate to profound ID, autism and/or a secondary psychiatric diagnosis	62.5	37-41 years	USA	positive behaviour support/active support/person centred planning	Person centred planning	Person centred planning (PCP)	not described	"traditional model"	Residential/home	IG: Small four-bedroom accomodation with community-based support CG: traditional residential and day treatment program	Individual	face-to-face	not clear	not described	Both integrated and segregated	yes	yes	no	no	no	nr	nr	not described	nr	nr	nr	nr	nr	n/a	n/a	1. Variety of community locations 2. Number of different activities 3. Variety of activities 4. Inclusive environments 5. Choice 6. Activities in job development or community service per participant per week 8. Number of social contacts 9. Challenging behaviours	1. Alternative model (AM) M = 22 per participant compared to M = 5 in the traditional model (TM). 2. AM (M = 30), TM (M = 20). 3. Participants in the TM spent more time in“down-time”, group trips and passive leisure activities compared to those in the AM who spent more time in active recreation, personal management and community errands. 4. AM participants had more inclusive experiences (86% inlc…	Employment/civic engagement
1	Malette 2002	Ratti 2016	Qualitative: interviews	Community	Participation	nr	nr	nr	nr	3	3	0	0	n/a	ID	severity not reported	33.3333	25-27 years	Canada	positive behaviour support/active support/person centred planning	Person centred planning	Person centred planning (PCP) using microboards		no CG	Residential/home	in home and community settings	Individual	face-to-face	not clear	not described	Both integrated and segregated	yes	yes	not clear	not clear	no	nr	nr	not described	nr	nr	nr	nr	nr	choice, empowerment and control	* enhancement of everyday choice making * greater feeling of empowerment and control over their situation	community involvement	* opportunity to experience greater involvement in the community	QoL and work
1	Robertson 2006	Ratti 2016, Howarth 2016	NRCT-No control	Community	Participation	residents in sites that showed a commitment to the implementation of PCP for enhancement of QoL	nr	nr	nr	93	93	0	nr	n/a	ID	severity not reported	nr	m=40.3	UK	positive behaviour support/active support/person centred planning	Person centred planning	Person centred planning (PCP)	not described	no CG	Residential/home	in home and community settings	Individual	face-to-face	not clear	not described	Both integrated and segregated	yes	yes	yes	yes	no	2 years	nr	not described	There was no significant difference of the average service package cost per individual between pre and post PCP implementation.	nr	support to organisations to help them develop policies, procedures and practices to implement person-centred planning. Training and support over 2 years.	nr	nr	Strengths and Difficulties Questionnaire, Risk Scale, medication info, health problems , Health Survey for England (scheduled day activities, physical activity)	Increase in challenging behaviour: 37% increase in hyperactivity, and non-significant increase in emotional problems (59%) and decrease in prosocial behaviour (14%). * A 67% increase in the reported number of health problems (p < 0.001) - it is likely that PCP helped care-givers become more aware of health problemsand health needs rather than making people unhealthy	Index of Community Involvement (ICI), Social Network Map, Client Receipt Inventory, and level of choice	* There were significant improvements in size of social network (52% increase, p < 0.01), contact with friends (p < 0.01), number of community activities (p < 0.001), variety of community activities (p < 0.001), hours per week scheduled activities (p < 0.05), and choice (p < 0.01). * 2.8 times more likely toparticipate in choice-making compared to baseline	Adaptive Behaviour Scale, Psychiatric Assessment Schedule for Adults with Developmental Disabilities, Learning Disabilities Casemix Scale, Employment
1	Hagner 1996	Ratti 2016	Qualitative: interviews	Community	Participation	adolescents transitioning to adult life	nr	nr	nr	6	6	0	nr	n/a	ID	2 mild, 3 mod, 1 sev ID	nr	16-22 years	USA	positive behaviour support/active support/person centred planning	Person centred planning	Person centred planning (PCP) for transition from school to adult life	not described further	no CG	not reported	not described	Individual	face-to-face	not clear	not described	Both integrated and segregated	not clear	not clear	not clear	not clear	not clear	nr	nr	not described	nr	nr	nr	nr	nr	n/a	n/a	participation/social connections	* 6 months after planning meeting, participants reported that only a few outcomes had been achieved and “not much had happened”. * Increased sense of closer social connection. * More opportunities opened up that seemed unrelated to the meetings but perhaps predisposed individuals to be more open to them such as participation in activities.	n/a
1	Parley 2001	Ratti 2016	Qualitative: other	Community	Participation	nr	nr	nr	nr	nr	nr	0	nr	n/a	ID	severity not reported	nr	nr	UK	positive behaviour support/active support/person centred planning	Person centred planning	Person centred planning (PCP)	not described further	no CG	Residential/home	hospital nursing care	Individual	face-to-face	Staff	not described	Both integrated and segregated	not clear	not clear	not clear	not clear	not clear	nr	nr	not described	nr	nr	nr	nr	nr	n/a	n/a	choice and participation	Improvements in areas of respect, choice and participation in everyday activities. No improvement reported in involvement of people in planning their care or making major life decision for themselves.	QoL
1	Espiner 2012	Ratti 2016	Qualitative: interviews	Community	Participation	nr	nr	nr	nr	10	10	0	nr	n/a	ID	severity not reported	50	nr	New Zealand	positive behaviour support/active support/person centred planning	Person centred planning	Person centred planning (PCP)	New facilitation approach of PCP following two days training for staff appointed as facilitators within the organisation (flatting/residential group homes).	no CG	Residential/home	in home and community settings	Individual	face-to-face	Staff	staff who were facilitators in their organisations	Both integrated and segregated	yes	yes	yes	yes	no	nr	nr	not described	nr	nr	nr	nr	nr	n/a	n/a	Self determination Plan implementation	* Participants reported increased self-determination. * Implementation of the plans was not discussed except for one participant who had complained about nothing changing in his life following plan facilitation. * only few family members and no other community members that could enable community connections attended PCP meetings, therefore reducing opportunities for further interactions.	n/a
1	Smith 2013	Schepens 2018	Case study (not multiple baseline)	Social and community	Participation	nr	nr	nr	nr	1	1	0	nr	n/a	ID	severe ID	male	68 years	Ireland	positive behaviour support/active support/person centred planning	Person centred planning	Person centred planning (PCP)	person-centred care planning and essential lifestyle plan to maintain skin integrity	no CG	not reported	not clear	Individual	face-to-face	Staff	not clearly described	Not clear	not clear	not clear	not clear	not clear	not clear	nr	nr	see description	nr	nr	nr	nr	nr	n/a	n/a	social inclusion	positive effect	physical wellbeing
1	Jensen 2001	Bigby 2012	Case study (not multiple baseline)	Community	Participation	nr	nr	nr	nr	1	1	0	0	n/a	ID	ID, autism, history of seizures, severe CB, hospitalisation, and large-scale congregate living	100	35 years	nr	positive behaviour support/active support/person centred planning	positive behaviour support/person centred planning interventions	Person centred planning (PCP) - multicomponent intervention	Multi-component intervention before and after move to small group homes. Detailed description of 5-phase intensive intervention led by specialist staff, including ongoing functional behaviour assessment, monthly reviews, person-centred plan (PCP), peer review, initially daily 4-hour community outings, functional communication training.	no CG	Residential/home	in small group home	Individual	face-to-face	Staff	not clear, but assume disability support workers?	Both integrated and segregated	yes	yes	yes	yes	no	not clear	initially 4hr daily community outings	see description	nr	nr	nr	nr	nr	Challenging behaviours	Significantly lower frequency and severity of CB.	Community setting use, aquaintances and choice	* Greater access to community settings, approx. 20 different locations a month, * increased number of acquaintances in community facilities, such as restaurants, museums. * Increased choice.	QoL
1	Mansell 2001	Bigby 2012	NRCT-No control	Community	Participation	nr	nr	nr	nr	13	13	0	nr	n/a	ID	Sev-profound ID, significant additional impairments and severe CB deemed to require continued institutional placement	nr	13-29 years	nr	positive behaviour support/active support/person centred planning	positive behaviour support/person centred planning interventions	Person centred planning (PCP)	Multifaceted demonstration project for people with ID. Individualised assessment and development of service package, individual service plan, support to service development, and additional support to new small group accommodation. Use of active support to focus staff support on engagement in activities in home and community	no CG	Residential/home	not clearly reported, but assume implemented in residential setting	Individual	face-to-face	Staff	not clear, but assume disability support workers?	Both integrated and segregated	yes	yes	yes	yes	no	nr	nr	see description	nr	nr	nr	nr	nr	Challenging behaviours	not reported	Meaningful activities, including community based activities	All participants showed increase in engagement in meaningful activity by approx. one third to 6 times. Breakdown of type of activity for some residents showed increase in community-based activity such as shopping. Relatively good maintenance of change over time except for 1 participant.	n/a
1	Bigby 1996	Schepens 2018	NRCT-No control	Social and community	Participation	nr	nr	nr	nr	62	62	0	nr	n/a	ID	most living in aged care/ID care	male & female (%nr)	55-85 years	Australia	positive behaviour support/active support/person centred planning	Person centred planning	Future Planning	Parents of people with ID future planning for their middle‐aged child with intellectual disability and the short and longer term effects.	no CG	not reported	not clear	Individual	face-to-face	Staff	not clearly described	Not clear	not clear	not clear	not clear	not clear	not clear	nr	nr	see description	nr	nr	nr	nr	nr	n/a	n/a	interpersonal relations, self determination,	positive effects (some of these could be from the other studies in this category)	emotional wellbeing
1	Lowe 1991	Howarth 2016	NRCT	Community	Participation	people living in the NIMROD catchment area, and from a separate area for comparison purposes	nr	nr	nr	196	171	25	nr	nr	ID	severity not reported	nr	nr	Wales	positive behaviour support/active support/person centred planning	planning/support	multidimensional residential and participation planning/support (clinical service)	A local, community-based mental handicap service: New Ideas for the care of Mentally Retarded people in Ordinary Dwellings (NIMROD) aimed to supplement existing service provision: supported accommodation in ordinary housing; support workers for those living in their family homes; professional input and a system of individual planning. Provided teaching and support to individuals to encourage thei…	comparison with an area outside of the service catchment area	Clinical - in/outpatient not clear	not clearly described	Individual	face-to-face	Clinician	Assume clinicians but not clear	Both integrated and segregated	not clear	not clear	not clear	not clear	not clear	nr	nr	see description	nr	nr	nr	nr	nr	n/a	n/a	Use of community facilities (a list of 18 types of community facilities, which were also available to the general public); and contact with relatives and friends (all types of contact such as letters, telephone calls, visits and social outings).	Mixed effects on participation * Overall, low proportions in all residential settings were said to have been in contact with friends during the study period and little change was noted. * Upon introduction of the new service, those that moved from hospital used more community facilities than before, as did those living at home receiving the new service. There was little change for those who conti…	n/a
1	Broer 2011	Howarth 2016	Mixed methods	Community	Participation	people w/ MH or ID in long-term mental health care sector	nr	nr	nr	186	186	0	nr	n/a	ID & PD	ID or PD	nr	nr	Netherlands	positive behaviour support/active support/person centred planning	ind/gp meetings/interventions, monitoring	Individual and group meetings and individual network and intervention mapping	Individual and group interventions; interviews and monitoring.	no CG	not reported	not clearly described	Individual and group	face-to-face	Clinician	Assume clinicians but not clear	Not clear	not clear	not clear	not clear	not clear	not clear	nr	nr	see description	nr	nr	nr	nr	nr	n/a	n/a	Social network: Professionals and clients together discussed clients’ networks and drew up a network circle that yielded the client’s total number of social contacts. Additional information was collected on category of contact (partner, family member, friend, acquaintance, colleague, neighbour, caregiver, fellow client, other category) and frequency of meeting (daily, weekly, monthly, once a year…	Overall, no contacts gained during the project. However, reported to be less lonely at the end of the project, and awareness reportedly led to other improvement actions – with positive outcomes such as seeing friends more often	n/a
1	DiTerlizzi 1994	Bigby 2012	Case study (not multiple baseline)	Community	Participation	nr	nr	nr	nr	1	1	0	0	n/a	ID	sev ID	0	40 years	nr	positive behaviour support/active support/person centred planning	positive behaviour support/person centred planning interventions	Impact of relocation to small group home	Identified the combined impact of opportunities, support, and significant events such as residential and educational environments on the QoL.	no CG	Residential/home	not clearly described	Individual	face-to-face	Staff	not clear, but assume disability support workers?	Both integrated and segregated	yes	yes	yes	yes	no	nr	nr	see description	nr	nr	nr	nr	nr	n/a	n/a	social participation & challenging behaviours	Vivid demonstration of qualitative change to life situation when opportunities for social participation are available. Periods in participant’s life when she had increased opportunities for social interaction and engagement coincided with reduced levels of CB. Illustrated variability of such opportunities over time.	QoL
2	Lowe 1996	Bigby 2012	NRCT-No control	Community	Participation	nr	nr	nr	nr	30	30	0	nr	n/a	ID	ID and CB	nr	nr	nr	positive behaviour support/active support/person centred planning	positive behaviour support/person centred planning interventions	Intensively tailored support	Evaluation of two specialist community services for people with ID and CB, and comparison of outcomes with people using more standard community living services with similar behaviour but not referred to specialist services. Specialist services provided intensively tailored support to staff and residents using a multidisciplinary team. Lived in various settings, including institutions, group homes…	no CG	Residential/home	not clearly reported, but assume implemented in residential setting. Some received support from "speicalist services"	Individual	face-to-face	Staff	not clear, but assume disability support workers?	Both integrated and segregated	yes	yes	yes	yes	no	nr	nr	see description	nr	nr	nr	nr	nr	Challenging behaviours	Outcomes did differ between the two specialist services, including number of severe behaviours.	Index of Community Involvement	No difference on ICI scores for residents using specialist and non-specialist services or in overall outcomes other than Index of Participation in Community Life and contact with staff. Outcomes did differ between the two specialist services, including hours of scheduled activity.	n/a
2	Carr 1999	Bigby 2012	Multi-methods	Community	Participation	nr	nr	nr	nr	3	3	0	nr	n/a	ID	ID with some symbolic communication and Hx of severe CB	66.6	14-39 years	nr	positive behaviour support/active support/person centred planning	Person centred planning	Positive behaviour support (PBS)	practical interventions based on positive behaviour support (PBS) principles. Detailed description of 5 components of assessment-based strategy, including rapport building, functional communication training, tolerance of delay, choice and embedding.	no CG	Residential/home	"applied in natural settings"	Individual	face-to-face	Staff	not clear, but assume disability support workers?	Both integrated and segregated	yes	yes	yes	yes	no	nr	nr	see description	nr	nr	nr	nr	nr	Challenging behaviours	Reduced frequency of CB across multiple community settings and living situations.	Community setting use, relationships and choice	Increased use of community settings. Significant changes in work, social relationships, and choice.	n/a
2	McClean 2007	Bigby 2012	Case study (not multiple baseline)	Community	Participation	nr	nr	nr	nr	5	5	0	0	n/a	ID	ID w Hx severe challening behr; 1 mild ID, 2 mod ID, 2 sev ID	60	nr	nr	positive behaviour support/active support/person centred planning	positive behaviour support/person centred planning interventions	Positive behaviour support (PBS)	Implementation of positive behaviour support. Comprehensive behavioural assessment and intervention (Willis, LaVigna, & Donnellan, 1993; LaVigna & Willis, 2005a). Implementation support by behaviour support planning meetings, mental health reviews, intensive support workers, emergency respite care, crisis response, environmental modifi cations, and relocation to individual apartment for 1 partici…	no CG	Residential/home	4/5 were living in group/community-based residential settings	Individual	face-to-face	Staff	not clear, but assume disability support workers?	Both integrated and segregated	yes	yes	yes	yes	no	nr	nr	see description	nr	nr	nr	nr	nr	Challenging behaviours	Observed CB reduced to near zero per month.	Community-based activity participation	Descriptive increase in community-based activities for 3/5 participants. Variable Periodic Service Review (PSR) score regarding the implementation of BSP, 95% to 48%.	QoL and employment
2	Magito-McLaughlin 2002 (Journal of Positive Behavior Interventions, doi:10.1177/10983007020040030401)	Bigby 2012	Case study (not multiple baseline)	Community	Participation	nr	nr	nr	nr	1	1	0	0	n/a	ASD & PD	autism, seizure disorder, rapid-cycling bipolar disorder, long history of severe CB, and placement breakdown.	100	nr	nr	positive behaviour support/active support/person centred planning	positive behaviour support/person centred planning interventions	Person centred planning (PCP) and Positive behaviour support (PBS)	Detailed intensive intervention with specialist staff based on principles of PBS including functional contextual behavioural assessment, generic solutions, and PCP. Included move to individual apartment and access to community-based day support.	no CG	not reported	not clear	Individual	face-to-face	Staff	not clear, but assume disability support workers?	Both integrated and segregated	yes	yes	yes	yes	no	nr	nr	see description	nr	nr	nr	nr	nr	Challenging behaviours	not reported	Community setting use time	Time in community settings increased from approx. 20 minutes per month to 190 – 260 hours following intervention.	employment
3	Treece 1999	Schepens 2018	Qualitative: other	Social and community	Capacity	nr	nr	nr	nr	2	2	0	0	n/a	ID	severe ID, in supported living in community	nr	69 years	USA	support for social participation (e.g., social prescribing, loneliness intervention)	Supporting choice making	Supporting choice making	effects of choice‐making opportunities on QoL	no CG	not reported	community?	Individual	face-to-face	not clear	not clearly described	Not clear	not clear	not clear	not clear	not clear	not clear	n/a	n/a	see description	nr	nr	nr	nr	nr	n/a	n/a	1. social inclusion 2. self-determination	1. positive 2. mixed (could be due to the other study not included, though)	n/a
3	Newlin 2015 - already identified but not extracted due to overlap with other rvws	Roche 2019	Systematic review	Social and community	Capacity and participation	adults w MH problems	nr	articles published up to 2014 from 21 electronic databases	nr	nr	nr	nr	nr	nr	PD	adults w MH problems	nr	nr	n/a	support for social participation (e.g., social prescribing, loneliness intervention)	Asset-based approaches, social skills development, goal setting, peer support interventions	Asset-Based Approaches, Social Skills Development, Goal Setting, Peer Support	Asset-Based Approaches, Social Skills Development, Goal Setting, Peer Support	nr	not reported	likely multiple settings	Individual	face-to-face	Multiple	various - not described	Both integrated and segregated	yes	yes	no	no	no	n/a	n/a	see description	nr	nr	nr	nr	nr	n/a	n/a	1. feelings of/actual connectedness	All intervention types: successful in increasing feelings of/actual connectedness	1. Self esteem 2. Personal health 3. Depression 4. QoL
4	Bould 2018	Louw 2019	Mixed methods	Community	Participation	nr	nr	nr	nr	16	16	0	nr	n/a	ID	severity not disclosed	male and female, % nr	18-64	Australia	support for convivial encounters in community	dog walking programme to facilitate convivial encounters	dog walking programme to facilitate convivial encounters	a visiting dog‐walking programme to facilitate encounters with community members	no CG	Community	n/a	Individual	face-to-face	not clear	not clearly described	Integrated (>=1 ppl without disability)	not clear	yes	no	no	members of the community	nr	nr	see description	nr	nr	nr	nr	nr	n/a	n/a	social confidence	Dog-walking programme facilitates pleasant encounters giving participants greater confidence to engage in social exchanges	n/a
4	Jessen 1996	Kamioka 2014	NRCT	Social	Quality of Life	adults in a skilled rehabilitation unit	nr	nr	nr	40	20	20	0	0	PD	depression	nr	older people	USA	animal	Avian companionship	Avian companionship	A bird was placed in the room of each subject in the experimental group. Care for the birds was provided either at times the subject was not in the room or byhaving a staff member bring the bird and cage out of the room so that there was no intervention by the investigator through interaction with the subject.	routine care	Clinical - inpatient	in a skilled rehabilitation unit	Individual	face-to-face	Staff	just referred to "staff"	Segregated (only for ppl with disability)	no	no	no	no	no	10 days	continuous companion		nr	bird	nr	nr	nr	n/a	n/a	loneliness	No reduction in CG, but not clear if reduced in IG	Morale, depression
4	Chu 2009	Maujean 2015, Kamioka 2014	RCT/quasi-RCT	Social	Capacity	adult inpatients with schizophrenia	nr	nr	nr	30	15	15	3	0	PD	Schizophrenia	nr	nr	Taiwan	animal	AAI: canine intervention	AAI: canine intervention	animal-assisted activities included learning to walk the dogs over obstacles, carrying the dogs, playing “throw and fetch” games with the dogs, and learning to relate to the dogs. Group discussions were held to debrief and reflect on patients’ experiences and feelings.	TAU	Clinical - inpatient	in the hospital garden	Group (>2 people)	face-to-face	Clinician	assume clinicians or animal therapists?	Segregated (only for ppl with disability)	yes	no	no	no	no	weekly for two months	50 minutes per week		nr	dogs	nr	nr	nr	adaptations of measures tapping: 1. self-esteem; 2. self-determination;	Improved	social support	no change	1. psychiatric symptoms (positive and negative symptoms of schizophrenia) 2. emotional symptoms.
4	Barak 2001	Kamioka 2014	NRCT	Social	Participation	long-stay geriatric schizophrenic patients	nr	nr	nr	20	10	10	10	10	PD	Schizophrenia	nr	nr	Israel	animal	Pet enrichment (cat or dog)	Pet enrichment (cat or dog)	therapists and assisting animals came to theward at 10:30 am, and the group session lasted 3 h. Three AAT counselors from the PET (Pet EnrichmentTherapy) program at Kibbutz Givat Haim Ichud, Israel, were regularly accompanied by a psychiatric nurse, providing a ratio of 1:2.5 caretakers to patients. Each patient was provided with his own dog or cat, according to personal preference. Sessions incl…	assembled for reading and discussion of current news for a similar duration on the same days that AAT was undertaken. These sessions were conducted by three certified nurses so as to keep the ratio of staff to patients equal to that of the AAT group	Residential/home	in the long stay residential service	Group (>2 people)	face-to-face	Clinician	therapists, psychiatric nurses	Segregated (only for ppl with disability)	not clear	no	no	no	no	weekly for 1 year	3 hr per session		nr	cat/dog	nr	psychiatric nurses	nr	n/a	n/a	Social-Adaptive Functioning Evaluation (SAFE)	significantly greater improvement in AAT gropu vs CG on total and "social functions" subscale	n/a
5	Harlan-Simmons 2001	Bigby 2018	Qualitative: other	Social and community	Participation	nr	nr	nr	nr	3	3	0	0	n/a	ID	severity not reported	nr	"older"	nr	community group participation	Community building intervention matching ppl w ID with community group	Community group linkage	Community builder matching person to community group and supporting interaction with others and participation in activities—with view to longer-term friendships. This intervention has sim_x0002_ilar aims to the befriending services but employed different strategies and used staff trained as “community builders” to work with individu_x0002_als to support the creation of “community connections and …	no CG	Community	Mainstream community groups	Group (>2 people)	face-to-face	not clear	not described	Integrated (>=1 ppl without disability)	yes	yes	not clear	no	no	nr	nr		nr	nr	nr	nr	nr	n/a	n/a	social networks	The community building process made a positive impact on social networks, bringing “a variety of community relationships into their (participants’) lives.” (p. 179)	n/a
5	Snethen 2012	Webber 2017, Newlin 2015 (not extracted)	Qualitative: interviews	Community	Participation	nr	nr	nr	nr	nr	nr	nr	nr	nr	PD	schizophrenia	nr	nr	nr	befriending/social interaction support	Independence through Community Access and Navigation (I-CAN)	Independence through Community Access and Navigation (I-CAN)	A recreational therapy to support community-based participation, matching individuals with interest-based activities and supported participation	no CG	not reported	not described	Not clear	face-to-face	not clear	no described	Integrated (>=1 ppl without disability)	Not clear	Not clear	Not clear	Not clear	Not clear	nr	nr	nr	nr	nr	nr	nr	nr	n/a	n/a	community involvement	Participants reported increased community involvement	n/a
5	Saxby 1986	Bigby 2012	Descriptive/cross-sectional	Community	Participation	nr	nr	nr	nr	10	10	0	nr	n/a	ID	severe/profound ID	30	24-58 years	nr	support for social participation (e.g., social prescribing, loneliness intervention)	nature of activities/interactions when visiting local amenities (e.g., shops/cafes) with staff	Community outings	Descriptive account of social inclusion in community settings: The nature of activity and social interaction when people with profound and severe ID visit local amenities, such as shops and cafes, with staff and other residents.	no CG	Community	Detailed observation of participants on 6 occasions when shopping and 3 occasions when visiting cafe or pub, and Survey of attitudes of 38 business people whose premises were used by participants.	Group (>2 people)	face-to-face	Staff	ppl were accompanied by staff and other residents	Integrated (>=1 ppl without disability)	no	yes	yes	no	no	n/a	n/a	observational study of regular community outings	nr	nr	nr	nr	nr	n/a	n/a	social/community participation	* All participants engaged in activities appropriate to the community setting, and most had some contact with members of public. * Relatively low levels of substantive engagement in meaningful activity while in community settings, 36% shopping, 23% cafes. * Low interaction levels with public between 0.7% and 2.3%; those with more severe ID, the least interaction. * Use of facilities accepted and …	n/a
5	Ouellette 1994	Howarth 2016	NRCT-No control	Community	Participation	ppl w ID in supported living recognised to have low social participation and loneliness	nr	nr	nr	nr	nr	0	nr	n/a	ID	ppl w ID in supported living	nr	nr	nr	support for social participation (e.g., social prescribing, loneliness intervention)	alteration to activity patterns to increase social network size	Community outings	Aim to increase frequency with which individuals experienced individually-defined target activities that should increase size of their social network; 6 month period comprising of: introduction in form of presentation; identification of target activities for each individual; scheduling and performing the targeted activities; monitoring of activity logs maintained by staff	no CG	Residential/home	not described	Individual	face-to-face	Staff	not clearly described	Not clear	not clear	not clear	not clear	not clear	not clear	6 months (no sessions nr)	nr	see description	increasing the frequency of defined target activities produced positive change without increasing the costs of support.	nr	nr	nr	nr	n/a	n/a	Social Network analysis Form – (a) the size of a person’s social network, (b) the size of each subgroup in the social network, (c) the duration of the relationships (family excluded), (d) the frequency activities were experienced with members of the social network in the last month. Resident lifestyle inventory – (a) the number of activities a person has performed during the last month, (b) the v…	increase their involvement in community activities from pre- to post-measurement with all participants reported to have an increased social network size that included both people within and outside of services, with average increase of five people (non\paid individuals) The social network size averaged 10.6 nonpaid people (range: 2–14) at the time of the premeasure and 15.8 nonpaid people (range:…	n/a
6	Moffat 2017 - 14	Pescheny 2020	Qualitative: interviews	Social and community	Participation	nr	nr	nr	nr	nr	nr	nr	nr	nr	PD	one or more of the following long-term conditions	nr	40-74	UK	support for social participation (e.g., social prescribing, loneliness intervention)	Social prescriber navigator referral	Link worker social prescribing programme, Newcastle upon Tyne	Navigators assess the psychosocial needs of the referred service users and jointly identify their health and wellness goals. Navigators connect service users to community and voluntary groups and activities (e.g. welfare rights advice, walking groups, physical activity classes, arts groups, continuing education) to help to achieve their goals.	No CG	Clinical - primary care	All referred to social prescribing services from primary care providers	Individual	face-to-face	Social navigator/prescriber	"navigator"	Integrated (>=1 ppl without disability)	not clear	yes	no	not clear	not clear	nr	nr	see description	nr	nr	nr	nr	nr	n/a	n/a	1. Social isolation 2. opportunity to learn new skill (e.g., art, singing, using gym equipment, playing sport) or reviving old skills	Reduced	1. self confidence 2. mental and physical health and wellbeing 3. Health-related behaviours
6	Brandling 2011 - 29	Pescheny 2020	Mixed methods	Social and community	Participation	nr	nr	nr	nr	nr	nr	nr	nr	nr	PD	patients with social disengagement or low mood	nr	nr	UK	support for social participation (e.g., social prescribing, loneliness intervention)	Social prescriber navigator referral	New Routes, Keynsham	Navigators assess patients’ non-medical needs in a one-hour appointment and connect them with appropriate sources of support, provided by third sector organizations, to meet their needs.	No CG	Clinical - primary care	All referred to social prescribing services from primary care providers	Individual	face-to-face	Social navigator/prescriber	"navigator"	Integrated (>=1 ppl without disability)	not clear	yes	no	not clear	not clear	not clear	1 hr Ax, not clear if repeated	see description	nr	nr	nr	nr	nr	n/a	n/a	Social isolation	Reduced	1. self-esteem, self-value, hope, feeling useful and worthwhile 2. self confidence 3. ability to identify their needs and act to improve health/wellbeing
6	Carnes 2017 - 26	Pescheny 2020	Mixed methods	Social and community	Participation	nr	nr	nr	nr	nr	nr	nr	nr	nr	PD	patients who were frequent attenders and/or socially isolated	nr	nr	UK	support for social participation (e.g., social prescribing, loneliness intervention)	Social prescriber navigator referral	Social Prescribing Service, London Boroughs of City and Hackney	At the first meeting with the navigator, service users discuss their personal circumstances and a mutually determined well-being action plan is developed. To achieve the goals on the action plan, service users are referred to community organizations and services. Volunteers are trained by the navigators to assist the delivery of the service and provide additional support to service users.	No CG	Clinical - primary care	All referred to social prescribing services from primary care providers	Individual	face-to-face	Social navigator/prescriber	"navigator"	Integrated (>=1 ppl without disability)	not clear	yes	no	not clear	not clear	nr	nr	see description	nr	nr	nr	nr	nr	n/a	n/a	n/a	n/a	number of prescribed meds
6	Dayson 2016 - 16	Pescheny 2020	Mixed methods	Social and community	Participation	nr	nr	nr	nr	nr	nr	nr	nr	nr	PD	primary care patients with complex long- staff, and voluntary and community organizations term conditions and carers of case-managed patients	nr	nr	UK	support for social participation (e.g., social prescribing, loneliness intervention)	Social prescriber navigator referral	The Rotherham Social Prescribing service, Rotherham	A navigator assesses the non-clinical support needs of patients and carers before referring them to appropriate services in the voluntary and community sector.	No CG	Clinical - primary care	All referred to social prescribing services from primary care providers	Individual	face-to-face	Social navigator/prescriber	"navigator"	Integrated (>=1 ppl without disability)	not clear	yes	no	not clear	not clear	nr	nr	see description	nr	nr	nr	nr	nr	n/a	n/a	1. Social isolation 2. opportunity to learn new skill (e.g., art, singing, using gym equipment, playing sport) or reviving old skills	1. Reduced 2. Benefit	1. self-esteem, self-value, hope, feeling useful and worthwhile 2. mental and physical health and wellbeing 3. Rotherham wellbeing scale
6	Farenden 2015 - 33	Pescheny 2020	Mixed methods	Social and community	Participation	nr	nr	nr	nr	nr	nr	nr	nr	nr	PD	patients with psychosocial needs	nr	nr	UK	support for social participation (e.g., social prescribing, loneliness intervention)	Social prescriber navigator referral	Community Navigation Programme, Brighton and Hove	A navigator assesses the psychosocial needs of patients and refers them to activities and services in the third sector. Once a service user is referred to an activity, the navigator follows-up the process, and if needed, offers further support.	No CG	Clinical - primary care	All referred to social prescribing services from primary care providers	Individual	face-to-face	Social navigator/prescriber	"navigator"	Integrated (>=1 ppl without disability)	not clear	yes	no	not clear	not clear	Ax session and follow up support	nr	see description	nr	nr	nr	nr	nr	n/a	n/a	1. social participation satisfaction	60% of service users who were socially isolated felt more satisfied with the amount of time they spend with others as a result of participating in SP	1. self confidence 2. ability to identify their needs and act to improve health/wellbeing
6	Vogelpoel 2014 - 27	Pescheny 2020	Mixed methods	Social and community	Participation	nr	nr	nr	nr	nr	nr	nr	nr	nr	PD	older patients who have single or multisensory impairment and experience social isolation and associated health problems	nr	"older"	UK	support for social participation (e.g., social prescribing, loneliness intervention)	Social prescriber navigator referral	Social Prescribing programme, Rotherham	The navigator contacts the service users and signpost them to a practical workshop programme. Transportation and communication needs are discussed at this stage. Regular contact is maintained with the navigator throughout the process, with reminders for transport arrangements and upcoming developments signposted to service users throughout the process.	No CG	Clinical - primary care	All referred to social prescribing services from primary care providers	Individual	face-to-face	Social navigator/prescriber	"navigator"	Integrated (>=1 ppl without disability)	not clear	yes	no	not clear	not clear	"regular contact"	nr	see description	nr	nr	nr	nr	nr	n/a	n/a	1. Social isolation 2. opportunity to learn new skill (e.g., art, singing, using gym equipment, playing sport) or reviving old skills	1. Reduced 2. Benefit	1. self-esteem, self-value, hope, feeling useful and worthwhile 2. self confidence
6	Kimberlee 2014 - 32	Pescheny 2020	Mixed methods	Social and community	Participation	nr	nr	nr	nr	nr	nr	nr	nr	nr	PD	patients with psychosocial needs	nr	nr	UK	support for social participation (e.g., social prescribing, loneliness intervention)	Social prescriber navigator referral	Wellspring Healthy Living Centre’s social prescribing wellbeing programme, Bristol	With the navigator’s support, service users set health and wellbeing goals in an action plan. Navigators support service users to access sources of support in the community (e.g. peer-support groups, creative activities, physical activities) to achieve their health and wellbeing goals.	No CG	Clinical - primary care	All referred to social prescribing services from primary care providers	Individual	face-to-face	Social navigator/prescriber	"navigator"	Both integrated and segregated	yes	yes	no	not clear	not clear	nr	nr	see description	nr	nr	nr	nr	nr	n/a	n/a	1. Social isolation 2. opportunity to learn new skill (e.g., art, singing, using gym equipment, playing sport) or reviving old skills 2. Friendship scale score	1. Reduced 2. Benefit 3. Significant improvement versus baseline	1. self confidence 2. mental and physical health and wellbeing 3. Depression (PHQ9)
6	Wigfield 2015 - 34	Pescheny 2020	Mixed methods	Social and community	Participation	nr	nr	nr	nr	nr	nr	nr	nr	nr	PD	at least one long-term condition and declining health and/or mental wellbeing	nr	nr	UK	support for social participation (e.g., social prescribing, loneliness intervention)	Social prescriber navigator referral	Fit for future programme, Nottinghamshire, Newcastle and West Cumbria	The navigators develop an action plan with patients and refer them to sources of support in the community to meet their needs.	No CG	Clinical - primary care	All referred to social prescribing services from primary care providers	Individual	face-to-face	Social navigator/prescriber	"navigator"	Integrated (>=1 ppl without disability)	not clear	yes	no	not clear	not clear	nr	nr	see description	nr	nr	nr	nr	nr	n/a	n/a	4 indicators of loneliness and isolation	no difference over time (ns)	1. Warwick Edinburgh Mental Wellbeing Scale
6	Friedli 2012 -35	Pescheny 2020	Mixed methods	Social and community	Participation	nr	nr	nr	nr	nr	nr	nr	nr	nr	PD	patients with psychosocial and/or practical support	nr	nr	UK	support for social participation (e.g., social prescribing, loneliness intervention)	Social prescriber navigator referral	Sources of Support (SOS), Dundee	The navigators assess the psychosocial needs of patients and refer them to appropriate sources of support in the third sector, to meet their non-clinical needs	No CG	Clinical - primary care	All referred to social prescribing services from primary care providers	Individual	face-to-face	Social navigator/prescriber	"navigator"	Integrated (>=1 ppl without disability)	not clear	yes	no	not clear	not clear	nr	nr	see description	nr	nr	nr	nr	nr	n/a	n/a	1. Social isolation 2. community interactions/ participation	1. Reduced 2. Acquiring skills promoted engagement in related local activities and interaction with people in the local community sector, beyond the SP programme	1. self confidence 2. Work and Social Adjustment Scale 3. Warwick Edinburgh Mental Wellbeing Scale 4. ability to identify their needs and act to improve health/wellbeing
6	The Health Foundation 2015 - 31	Pescheny 2020	Mixed methods	Social and community	Participation	nr	nr	nr	nr	nr	nr	nr	nr	nr	PD	nr	nr	nr	UK	support for social participation (e.g., social prescribing, loneliness intervention)	Social prescriber navigator referral	Shine, London Boroughs of City and Hackney	The navigator assesses the service users’ non-clinical needs and connects them with community services delivered by 85 statutory and voluntary groups.	No CG	Clinical - primary care	All referred to social prescribing services from primary care providers	Individual	face-to-face	Social navigator/prescriber	"navigator"	Integrated (>=1 ppl without disability)	not clear	yes	no	not clear	not clear	nr	nr	see description	nr	nr	nr	nr	nr	n/a	n/a	Social isolation	Reduced	1. self-esteem, self-value, hope, feeling useful and worthwhile 2. positive and active engagement in life 3. mental and physical health and wellbeing 4. HADS 5. General wellbeing
6	ERS Research and Consultancy 2013 - 30	Pescheny 2020	Mixed methods	Social and community	Participation	nr	nr	nr	nr	nr	nr	nr	nr	nr	PD	patients with psychosocial needs	nr	nr	UK	support for social participation (e.g., social prescribing, loneliness intervention)	Social prescriber navigator referral	Newcastle Social Prescribing project, Newcastle	People are referred to one of the five collaborating Linkwork Organizations (Age UK, HealthWorks, Newcastle Carers, Search and West End Befrienders). Navigators from the Linkwork Organization assess the non-clinical needs of referred service users and either refer them to activities provided by their organization or refer them to other activities in the third sector to meet their non-clinical nee…	No CG	Clinical - primary care	All referred to social prescribing services from primary care providers	Individual	face-to-face	Social navigator/prescriber	"navigator"	Integrated (>=1 ppl without disability)	not clear	yes	no	not clear	not clear	nr	nr	see description	nr	nr	nr	nr	nr	n/a	n/a	n/a	n/a	1. self-esteem, self-value, hope, feeling useful and worthwhile 2. self confidence 3. mental and physical health and wellbeing
6	Baines 2015 - 37	Pescheny 2020	Mixed methods	Social and community	Participation	nr	nr	nr	nr	nr	nr	nr	nr	nr	PD	patients who had experienced a recent change in their service users circumstances, such as a diagnosis of a chronic condition or bereavement	nr	nr	UK	support for social participation (e.g., social prescribing, loneliness intervention)	Social prescriber navigator referral	Rugby Social Prescribing Project, Warwickshire	The navigator assesses the patient’s non-clinical needs and signpost them to sources of support in the community.	No CG	Clinical - primary care	All referred to social prescribing services from primary care providers	Individual	face-to-face	Social navigator/prescriber	"navigator"	Integrated (>=1 ppl without disability)	not clear	yes	no	not clear	not clear	nr	nr	see description	nr	nr	nr	nr	nr	n/a	n/a	n/a	n/a	1. self-esteem, self-value, hope, feeling useful and worthwhile
6	Age UK 2012 -36	Pescheny 2020	Mixed methods	Social and community	Participation	nr	nr	nr	nr	nr	nr	nr	nr	nr	PD	mild-moderate depression or were lonely and socially isolated	nr	55+ years old	UK	support for social participation (e.g., social prescribing, loneliness intervention)	Social prescriber navigator referral	Social Prescribing, Yorkshire and Humber	The navigator completes an in-depth assessment of the service users’ social, emotional and practical support needs. Service users are then signposted to Age UK services to meet their identified non-clinical needs.	No CG	Clinical - primary care	All referred to social prescribing services from primary care providers	Individual	face-to-face	Social navigator/prescriber	"navigator"	Integrated (>=1 ppl without disability)	not clear	yes	no	not clear	not clear	nr	nr	see description	nr	nr	nr	nr	nr	n/a	n/a	n/a	n/a	assessed mental wellbeing
6	Grayer 2008 - 28	Pescheny 2020	NRCT-No control	Social and community	Participation	nr	nr	nr	nr	nr	nr	nr	nr	nr	PD	nr	nr	nr	UK	support for social participation (e.g., social prescribing, loneliness intervention)	Social prescriber navigator referral	GPCMHW Community Link scheme, London Boroughs of Camden and Islington	graduate primary care mental health workers (GPCMHW) carry out a semi-structures assessment of service user’s psychosocial needs and advice service users about potential community resources which might help to meet their identified needs. The GPCMHW make the initial contact with the organizations and when required accompany service users to their initial meeting.	No CG	Clinical - primary care	All referred to social prescribing services from primary care providers	Individual	face-to-face	Social navigator/prescriber	mental health care worker	Integrated (>=1 ppl without disability)	not clear	yes	no	not clear	not clear	nr	nr	see description	nr	nr	nr	mental health care worker	nr	n/a	n/a	n/a	n/a	1. Work and Social Adjustment Scale 2. General health (GHQ-12)
6	Loftus 2017 -25	Pescheny 2020	NRCT	Social and community	Participation	nr	nr	nr	nr	nr	nr	nr	nr	nr	PD	chronic condition and either evidence of polypharmacy (defined as five or more repeat medications) or viewed by the general practitioner as a frequent attender	nr	>65 years of age	UK	support for social participation (e.g., social prescribing, loneliness intervention)	Social prescriber navigator referral	Social prescribing programme, Northern Ireland	The social prescribing navigator and the service user agree on a 12-week programme, including, e.g. social clubs, Men’s Shed, counselling, arts programme, falls prevention, exercises classes, crochet classes, personal development, craft classes, befriending and computer courses, to improve the health and wellbeing of the service user.	not described	Clinical - primary care	All referred to social prescribing services from primary care providers	Individual	face-to-face	Social navigator/prescriber	"social prescribing navigator"	Integrated (>=1 ppl without disability)	not clear	yes	no	not clear	not clear	Assessment session + 12 weeks	nr	see description	nr	nr	nr	nr	nr	n/a	n/a	n/a	n/a	number of prescribed meds
6	Grant 2000 - 15	Pescheny 2020	RCT/quasi-RCT	Social and community	Participation	nr	nr	nr	nr	nr	nr	nr	nr	nr	PD	nr	nr	nr	UK	support for social participation (e.g., social prescribing, loneliness intervention)	Social prescriber navigator referral	Amalthea Project, Avon	a navigator provides support and encourages attendance at recommended local and national voluntary organizations and support groups	Not described	Clinical - primary care	All referred to social prescribing services from primary care providers	Individual	face-to-face	Social navigator/prescriber	"navigator"	Both integrated and segregated	yes	yes	no	not clear	not clear	nr	nr	see description	nr	nr	nr	nr	nr	n/a	n/a	1. Duke-UNC functional social support scale 2. COOP/WONCA functional health assessment chart for social activities	1. Ns b/n groups 2. Ns b/n groups	1. COOP/WONCA fuctional health assessments (daily activities) 2. HADS - anxiety 3. HADS - depression 4. perceived quality of life (delighted-terrible faces scale)
6	Webber 2018 (under rvw in SR) - doi: 10.1177/1049731517753685	Webber 2017	RCT/quasi-RCT	Community	Participation	nr	nr	nr	nr	nr	nr	nr	nr	nr	PD	"mental health problems"	nr	nr	UK	befriending/social interaction support	Connecting people intervention	Connecting people intervention	Staff work with mental health service users to identify opportunities within their local community to achieve their recovery-oriented goals. This requires engagement with local communities beyond mental health services	not described	Clinical - in/outpatient not clear	service environment not described	Not clear	face-to-face	not clear	"Staff work with mental health service users"	Integrated (>=1 ppl without disability)	Not clear	Not clear	Not clear	Not clear	Not clear	nr	nr	nr	nr	nr	nr	nr	nr	n/a	n/a	access to social capital, perceived social inclusion	Participants’ access to social capital and perceived social inclusion improved significantly where the intervention was implemented with high fidelity	n/a
6	Barbato 2007	Webber 2017, Newlin 2015 (not extracted)	NRCT-No control	Community	Participation	nr	nr	nr	nr	nr	nr	nr	nr	nr	PD	severe mental health problems who did not engage well with mental health services	nr	nr	Italy	befriending/social interaction support	urban project to support social functioning, social inclusion, participation in community life (esp leisure and recreation)	The Urban Project	The project aimed to enhance participants’ social functioning, general wellbeing and social inclusion through participation in community life, particularly leisure and recreation facilities. Specific issues such as self-care, psychological well-being, family relationships and interpersonal skills were addressed as intermediate goals	no CG	not reported	not described	Not clear	face-to-face	not clear	a team of professionals working flexibly to meet the needs of people who were difficult to engage with mental health services	Integrated (>=1 ppl without disability)	Not clear	Not clear	Not clear	Not clear	Not clear	nr	nr	nr	nr	nr	nr	nr	nr	interpersonal skills	Improvements were observed in interpersonal skills	social networks and community participation	improvements were observed in links with social networks and participation in the community	n/a
6	Terzian 2013	Ma 2020, Webber 2017, Anderson 2015	RCT/quasi-RCT	Social and community	Participation	adults < 45 years w schizophrenia spectrum disorder by the ICD-10th	nr	nr	nr	357	172	173	12 dropped out - nr from which group	nr	PD	schizophrenia spectrum disorder by the ICD-10th	nr	nr	Italy	befriending/social interaction support	Supported socialisation and wider community approaches	Supported socialisation and wider community approaches	Social network intervention: participants were helped to identify their possible areas of interest, and social activities were suggested. Staff identified possible areas of interest for individuals and proposed social activities taking place with members of the community outside mental health services.	TAU	Clinical - outpatient	47 community mental health services (SPT) in Italy (secondary care setting)	Individual	face-to-face	Multiple	Provided by a staff member or natural facilitators such as families, neighbours, or volunteers	Both integrated and segregated	yes	not clear	no	yes	neighbours, volunteers	unclear - 3-6 m intervention duration	unclear	see description	nr	nr	nr	nr	nr	n/a	n/a	Social network: different parameters of relationships were assessed, all were summarized into a score. A social network improvement was defined as an increase in the number, frequency, importance or closeness of relationships, and an overall social network improvement was definied as an improvement in intimate or working relationships.	Significant between group differences in the improvement of social network and overall social network improvement were found: a 45.5 % increase in social network size An improvement in social network was found at year 1 in 25% of patients in CG and 39.9% of patients in the IG (OR 2.0, 95% CI 1.3–3.1; AOR 2.4, 95% CI 1.4–3.9) At year 1, an overall social network improvement was reported for 30.8% …	(1) Psychiatric symptoms (2) Hospitalisation over the follow-up year
6	Middelboe 1997	Webber 2017, Newlin 2015 (not extracted)	NRCT-No control	Social and community	Capacity and participation	nr	nr	nr	nr	nr	nr	nr	nr	nr	PD	"mental health problems"	nr	nr	nr	befriending/social interaction support	Group home in collaboration with MH services for supported community engagement	Group home in collaboration with MH services	The programme operates according to the concept of supported housing, by providing a supportive, non-treatment environment based on small units of three to five residents. Support provided by the staff aimed to improve personal and social skills, supporting social activities outside the residence, monitoring symptoms and ensuring treatment compliance. The local psychiatric service is responsible …	no CG	Residential/home	supported housing - units with 3-5 residents	Not clear	face-to-face	not clear	no described	Integrated (>=1 ppl without disability)	Not clear	Not clear	Not clear	Not clear	Not clear	nr	nr	nr	nr	nr	nr	nr	nr	n/a	n/a	social network	Scores in social-related quality of life and social integration increased; number of reciprocal supportive contacts increased: 30% of these contacts were relatives, 21% fellow residents, 27% other social acquaintances. No change in total network size or number of friends providing support	n/a
7	Sheridan 2015	Webber 2017, Anderson 2015, Sietta 2017	RCT/quasi-RCT	Community	Participation	nr	nr	nr	nr	107	52	55	nr	nr	PD	schizophrenia, schizo-affective disorder, depression or bipolar disorder	nr	nr	Ireland	befriending/social interaction support	Supported socialisation interventions (e.g., in seniors centre program, with peer support, the Toward Recovery, Empowerment and Experiential Expertise (TREE) model, Netmums Helping with Depression, case management)	Supported socialisation: Befriender program/intervention	A volunteer befriender was matched with the participant, who received a €20 monthly stipend. They undertook social or leisure activities for about 2 h a week over a 9-month period They spent time in the community together doing activities of interest to the patient	not described	Community	community setting	Not clear	face-to-face	Community members	"volunteer"	Integrated (>=1 ppl without disability)	not clear	yes	no	no	"befriender"	weekly for 9 months	2 hours per week	see description	nr	nr	nr	nr	nr	n/a	n/a	Social functioning and loneliness	Both intervention and control groups (who also received a €20 monthly stipend) increased in recreational social functioning and decreased in social loneliness, no significant difference between groups. A trend towards increased social network size at the end of the intervention period (2 years)–a 7 % improvement–but these results were not found to be statistically significant. Loneliness: SMD=-0.…	Depression PROM
7	Davidson 2004	Siette 2017, Fuhr 2014	RCT/quasi-RCT							260	nr	nr	nr	nr	PD	SMI	nr	nr	USA	befriending/social interaction support		The Partnership Project	Volunteer befrienders (stipend received for the session), face to face in pts home and in the community, supported by Local voluntary organisation and academic, matched based on shared interests, age and gender	not described	Community		Group (>2 people)	face-to-face	Community members		Integrated (>=1 ppl without disability)						weekly for 9m	2-4 hrs				initial training and orientation as well as ongoing monthly support meetings			n/a	n/a	social functioning (SFS)	no effect	Non-psychotic psychiatric symptomatology (GHQ), psychiatric symptoms (BPRS), functional impairment (GAF-M), diagnosis (SCID), satisfaction (own scale), self-esteem (RSE)
7	Harris 1999	Siette 2017	RCT/quasi-RCT							86	nr	nr	nr	nr	PD	chronic depression	0	nr	UK	befriending/social interaction support		befriending	befriending, supported by Academic and social care agency, matched based on similarity of background experience	not described	Residential/home		Group (>2 people)	face-to-face	Community members		Integrated (>=1 ppl without disability)						weekly for 12m	1 hr				3-day training course			n/a	n/a	n/a	n/a	depression (PSE-10)
7	McCorkle 2008	Siette 2017	RCT/quasi-RCT							154	nr	nr	nr	nr	PD	SMI	nr	nr	USA	befriending/social interaction support		befriending	befriending, supported by Local voluntary organisation and academic, matched based on client’s age, gender, race, ethnicity, interests and psychiatric condition	not described	Residential/home		Group (>2 people)	face-to-face	Community members		Integrated (>=1 ppl without disability)						monthly for 12m	4 hrs				training given, but details nr			n/a	n/a	social support Composite measures of ISEL and LQoL*	positive effect (6m or 12m): SMD=0.41 (0.09, 0.73)	Psychiatric symptoms (HSC, CSI) Wellbeing Composite measures of RSE, RAS, HHS, MDES, LRI, LQoL
7	McNeil 1991	Siette 2017	RCT/quasi-RCT							30	nr	nr	nr	nr	PD	depression	nr	nr	Canada	befriending/social interaction support		befriending	befriending, supported by Health agency and academic.	not described	Residential/home		Group (>2 people)	face-to-face	Community members		Integrated (>=1 ppl without disability)						2Xweek for 6 weeks	20-40 minutes per session				not clear			n/a	n/a	n/a	n/a	depression (BDI)
7	Heslop 2005	Bigby 2018	Qualitative: interviews	Social and community	Capacity and participation	nr	nr	nr	nr	34 w ID 42 befrienders 15 workers 46 parents/carers	34 w ID 42 befrienders 15 workers 46 parents/carers	0	nr	n/a	ID	severity not reported	nr	nr	UK	befriending/social interaction support	Befriender program/intervention aiming to establish friendships with people without disability.	Befriender program/intervention	Befriender program/intervention: primary strategies used in these programmes were to recruit volunteers, match them individually, by personal interests, to a person with intellectual disability and support the developing friendship	no CG	Community	mainstream community or private places	Individual	face-to-face	Community members	volunteer befrienders	Both integrated and segregated	yes	yes	yes	yes	not clear	nr	nr		nr	nr	nr	nr	nr	n/a	n/a	interpersonal social participation	not very successful at engaging ppl in community: Many activities engaged in were home-based (e.g., watching a video). People with ID had limited choice about nature and frequency of contact with their befrienders	n/a
7	Hughes 1999	Howarth 2016, Sietta 2017	Case study (not multiple baseline)	Social and community	Participation	people with low level of social participation and loneliness as a result of living circumstances	nr	nr	nr	4	4	0	0	n/a	ID	"learning disabilities"	nr	nr	UK	befriending/social interaction support	Befriender program/intervention	Befriender program/intervention	Befriending: an intensive model for increasing the social networks of people with learning disabilities living in supported housing	no CG	Residential/home	intervention for people living in supported housing	Individual	face-to-face	not clear	not clearly reported	Not clear	not clear	not clear	not clear	not clear	not clear	nr	nr	see description	nr	nr	nr	nr	nr	n/a	n/a	Circle of friends measure (measuring social networks) and local Trust service audit (measuring participation in the community) – interviews focused on the service users’ social networks and their participation in activities in the community	A slight increase in network size, but this is as a result of an increase in size of only one of the service user’s networks	n/a
8	Fokkema 2007	Masi 2011	NRCT	Social	Participation	Adults with physical or mental health problems and living on their own	nr	IG: recruited through brochures and local newspapers and invited by helpers. CG: recruited by postal questionnaire among homosexual older adults.	nr	52	nr	nr	nr	nr	PD	Adults homosexuals with physical or mental health problems and living on their own	60	m=67 years	nr	befriending/social interaction support	loneliness ints- community dwelling w SMI loneliness ints- psych disruption > traumatic birth experience loneliness ints- adults w physical/MH probs living alone loneliness ints- depressed/traumatised seniors loneliness ints- undergrads w moderate depression on BDI loneliness ints- older adults w suicidal ideation, depression, isolation loneliness ints- naval treinees w BDI > 30 or at-risk stress	Social support: Buddy Care for Homosexuals	Social and/or emotional support visits by volunteer homosexuals aimed at enlarging social network and participation and improving selfmanagement abilities. Home-based intervention of variable duration.	not described	not reported	not clearly described	Individual	face-to-face	Peer	"volunteer homosexual" buddy	Both integrated and segregated	yes	yes	no	no	no	nr	nr	see description	nr	nr	nr	buddy who is a homosexual	nr	n/a	n/a	11-item De Jong Gierveld Loneliness Questionnaire	Effect size: 0.00 (95%CI: -0.55, 0.55) - ns	n/a
8	Boen 2012	Ma 2020	RCT/quasi-RCT	Social and community	Participation	seniors with mild depression	nr	nr	nr	138	nr	nr	nr	nr	PD	mild depression	nr	nr	Norway	befriending/social interaction support	Supported socialisation and wider community approaches	Supported socialisation and wider community approaches	The experimental group: included group meeting, physical training programme, and a self-help group. Transportation and warm meals were also provided	Waitlist	Community	Seniors centres in 2 Municipal districts in eastern and western Oslo, Norway (general population setting)	Group (>2 people)	face-to-face	Community members	The team consisted of volunteers; all completed a training course and were supervised by a registered nurse and an experienced senior centre leader	Both integrated and segregated	yes	yes	no	no	community members in senior citizen's centre	about 35–38 weekly group meetings	3 h per meeting	see description	nr	nr	"training course" not otherwise describedf	Volunteers - no clinicians	nr	n/a	n/a	Objective social isolation outcome: the Oslo-3 Social Support Scale	Both groups had an increased level of social support, but greater improvement in the intervention group than the control group, d = 0.12, 95% CI (− 0.47, 0.81). (measured at end of treatment)	depressive symptoms; life satisfaction
8	Rivera 2007	Ma 2020, Fuhr 2014, White 2020, Pitt 2013, Newlin 2015 (not extracted)	RCT/quasi-RCT	Social and community	Participation	adult w psychotic or mood disorder on axis I	nr	nr	nr	203	nr	nr	nr	nr	PD	psychotic or mood disorder on axis I	nr	nr	USA	befriending/social interaction support	Guided peer support +/- case management	IG1: Peer-assisted care supported socialisation IG2: Nonconsumer assisted supported socialisation	Peer assisted care group: professionals provided conventional crisis management, therapeutic services and concrete services; paraprofessional consumers facilitated social networks and provided social support through activities, home visits and phone calls Clinic based care group: only provided office-based services	CG1: standard care CG2: clinic-based care	Clinical - inpatient	inpatient unit in a city hospital in New York, US (secondary care setting)	Individual and group	face-to-face	Multiple	All professionals were licensed clinical social workers, also received training and supervisions Consumers had a history of multiple hospitalisations for mood or psychotic disorders, were eligible for disability benefits, relied on medication, but had 3–8 years of sobriety and stability. They had the same trainings as professional, and were supervised by social worker	Segregated (only for ppl with disability)	yes	not clear	no	no	no	unclear	24hr availability of telephone contact, but duration of contact n/a	see description	nr	nr	consumers and professionals received the same training	peers with MH problems, working alongside mental health professionals	nr	n/a	n/a	1. Objective social isolation outcome: a modification of the Pattison Network Inventory 2. social network and participation	1. Only peer-assisted group showed an increase in social contacts from baseline to 12-month follow-up (F (2, 118) = 7.25, p < 0.01, effect size = 0.11). No significant between-group difference in other network measures (p > 0.05) Measured at 6 and 12m post-baseline 2. Improvements in network measures were observed in all arms of the trial: total number of others involved in social activities, rec…	quality of life; psychiatric symptoms
8	Solomon 1995 #70 and # 74	Ma 2020	RCT/quasi-RCT	Social and community	Participation	adults w schizophrenia or major affective disorders	nr	nr	nr	96	nr	nr	nr	nr	PD	schizophrenia or major affective disorders	nr	nr	USA	befriending/social interaction support	Supported socialisation and wider community approaches	Supported socialisation and wider community approaches: Consumer management team	Both consumer and non-consumer management team followed an assertive community treatment model (1) Provided activities: housing, rehabilitation and social activities (2) Case managers provided assistance and supported clients, supervised by consumer supervisor	Supported socialisation and wider community approaches: Non-consumer management team	Clinical - outpatient	A community mental health centre, US	Individual	face-to-face	Multiple	Requirements for consumer management team: have major mental health problems, ≥ 1 previous psychiatric hospitalisation, a minimum of 14 days of psychiatric hospitalisation, or at least 5 psychiatric emergency service contacts within a year Requirements for non-consumer case management team: consisted of mental health professionals and recent college graduates	Both integrated and segregated	no	not clear	no	no	other consumers	unclear	unclear	see description	nr	nr	nr	mental health professionals and recent college graduates; peer consumers who have had a prior MH hospitalisation for >14 days	nr	n/a	n/a	1) Family and social contacts (2) Pattison’s Social Network scale	No significant between-group difference in social networks (p > 0.05). On average, participants identified 2.72 persons in their social network, 1.55 positive network members and 1.60 family members (measured at 1m and 12m for #70) No significant between-group difference in social outcome; also no significant time and condition effect (F (12,78) = 1.19, p > 0.05 (measured at 2y for #74)	(1) Use of services (2) Quality of Life (3) Psychiatric symptoms
8	Harrop 2015	Webber 2017	Case study (not multiple baseline)	Social and community	Participation	nr	nr	nr	nr	nr	nr	nr	nr	nr	PD	psychosis	nr	nr	nr	befriending/social interaction support	"Friends intervention"	"Friends intervention"	Mental health professional meeting with an individual’s friend(s) to share information; re-establish shared activities; plan support and discuss emotions	no CG	Clinical - in/outpatient not clear	not described, but assume mental health service?	Individual	face-to-face	Clinician	"mental health professional"	Integrated (>=1 ppl without disability)	Not clear	Not clear	Not clear	Not clear	Not clear	nr	nr	nr	nr	nr	nr	nr	nr	n/a	n/a	friendships/social network	Increased contact with friends and re-establishment of social networks	n/a
9	Jantz 2011	Tobin 2014	Multi-methods	Community	Participation	nr	nr	nr	nr	35	35	0	nr	n/a	ASD	Aspergers	68.6	24-77 years	USA	community group participation	Support group	Support group members	investigated the characteristics of adults with AS who were current, past, or hopeful future members of support groups. Current members all participated in informal ‘‘discussion groups’’ held at the same location. Overall, participants tended to have few relationships with individuals who were not family members, and reported a higher degree of loneliness on the UCLA Loneliness Scale than other g…	no CG	not reported	informal support groups	Group (>2 people)	face-to-face	not clear	not reported	Segregated (only for ppl with disability)	yes	no	no	no	no	nr	nr	nr	nr	nr	nr	nr	nr	n/a	n/a	UCLA LonelinessScale AQ	AQ scores positively correlated with loneliness scores (p<= .05) Loneliness scores negatively correlated with number of close friends(not including family members)(p <= .05) and social engagements (p <= .05) Close friendships with family members related to having close friends who were not family(p <= .05) simply having spent a longer time in informal support groups was not correlated with decrea…	n/a
9	Wilson 2017	Louw 2019	Qualitative: interviews	Community	Participation	nr	nr	nr	nr	10	10	0	nr	n/a	ID	nr	30	19-48 years	Australia	community group participation	structured social group participation	structured social group participation	a structured social group, who met weekly for 2 hr to discuss new social activities of interest that appeal to all of them	no CG	not reported	not described	Group (>2 people)	face-to-face	not clear	not reported	Segregated (only for ppl with disability)	yes	no	no	no	no	weekly	2 hrs p/week	see description	nr	nr	nr	nr	nr	n/a	n/a	participation/belonging	Two key themes emerged—(a) supported engagement fosters well‐being, and (b) structured social groups develop social belonging and connectedness. Participants acknowledged support is needed to participate and that social group changed their personal lives in many ways	n/a
9	Kaplan 2011	Ma 2020, Naslund 2015, Fortuna 2020	RCT/quasi-RCT	Social	Participation	adults w schizophrenia spectrum or affective disorder	nr	nr	nr	300	nr	nr	nr	nr	PD	schizophrenia spectrum or affective disorder	33	nr	USA	peer support	internet-based peer support	Supported socialisation: Experimental peer support listserv vs. experimental peer support bulletin board	Experimental peer support listserv: participants communicated anonymously with each other via a group distribution email list Experimental peer support bulletin board: participants were instructed on how to create account and log in to board	waitlist	Online/telephone	online	Individual and group	online	Peer	The online communication of both listserv and bulletin board group were solely peer directed, but technical support was provided via phone or email	Segregated (only for ppl with disability)	yes	no	no	no	no	unclear - intervention lasted 12m	nr	see description	nr	internet and computer access for participants	nr	nr	nr	n/a	n/a	Subjective social isolation outcome: the Medical Outcomes Study (MOS) Social Support Survey	No significant between-group difference on MOS (F (1,298) = 0.08, p = 0.93), also not significant when two experimental groups compared to the control group separately (p > 0.05) (outcomes measured at 4 and 12m fu (post-baseline)	personal recovery; quality of life; psychiatric symptoms
9	Kaplan 2014	Naslund 20155, Fortuna 2020	RCT/quasi-RCT	Social	Capacity	nr	nr	nr	nr	60	nr	nr	nr	nr	PD	Schizophrenia, affective disorder	100	nr	USA	relationships/roles - parenting	web-based education and social support	web-based education and social support	Web-based education and social support intervention designed to enhance parenting skills, improve coping skills and decrease parental stress for mothers with SMI	online healthy lifestyle intervention	Online/telephone	online	Individual and group	online	not clear	not clearly described	Segregated (only for ppl with disability)	not clear	no	no	no	no	3 months	nr		nr	internet and computer access for participants	nr	nr	nr	1. parenting skills 2. coping skills 3. self-efficacy	1. enhanced parenting skills 2. improved coping skills 3. No improvement in efficacy	perceived support	no effects	1. willingness to recieve support 2. parental stress
9	Proudfoot 2012	Naslund 20155, Fortuna 2020, White 2020	RCT/quasi-RCT	Social	Capacity	nr	nr	nr	nr	407	nr	nr	nr	nr	PD	Bipolar	30	nr	Australia	peer support	web-based education and peer support	web-based education and peer support	online Bipolar Education Program (BEP) aimed at providing education and skill building; BEP enhanced with email support from peers; or a control condition consisting of basic facts about bipolar disorder.	not described	Online/telephone	online	Individual and group	online	not clear	not clearly described	Segregated (only for ppl with disability)	yes	no	no	no	no	8 weeks	nr		nr	internet and computer access for participants	nr	nr	nr	n/a	n/a	n/a	n/a	psychological wellbeing
9	Alvarez-Jimenez 2013, Gleeson 2014	Naslund 20155, Fortuna 2020	NRCT-No control	Social	Capacity	nr	nr	nr	nr	20	20	0	nr	n/a	PD	First episode psychosis or mood disorder	50	nr	Australia	peer support	HORYZONS on line platform w peer-to-peer social networking	HORYZONS on line platform w peer-to-peer social networking	HORYZONS is an online platform that includes psychosocial interventions targeting risk factors for relapse; peer-to-peer online social networking; and expert moderation.	no CG	Online/telephone	online	Individual and group	online	not clear	not clearly described	Segregated (only for ppl with disability)	yes	no	no	no	no	1 month, frequency nr	nr		nr	internet and computer access for participants	nr	nr	nr	n/a	n/a	adherence	60% of participants used HORYZONS, 70% used it for at least 3 weeks, and 95% used the peer-to-peer social networking component.	1. depression 2. safety
9	Castelein 2008	Webber 2017, Anderson 2015	RCT/quasi-RCT	Social and community	Participation	nr	nr	nr	nr	106	56	50	nr	nr	PD	psychosis	nr	nr	Netherlands	peer support	Guided peer support +/- case management	Guided peer support	16 sessions of 90 min of peer support group, minimally guided by a psychiatric nurse. Sessions discussed daily life experiences	not described	Clinical - outpatient	Mental health centre	Group (>2 people)	face-to-face	Clinician	psychiatric nurse	Segregated (only for ppl with disability)	yes	no	no	no	no	16 sessions over 8 months	1.5 hrs per session	see description	nr	nr	nr	nr	nr	n/a	n/a	relationships	Intervention group increased contact and improved relationships with peers but not wider friends or family. participants listed professional staff as members of their network at the same rate as they claimed peers as member	Self esteem, quality of life
9	Gammonley 2001	Webber 2017, Newlin 2015 (not extracted)	NRCT	Social and community	Capacity and participation	nr	nr	nr	nr	nr	nr	nr	nr	nr	PD	severe mental health problems	nr	nr	nr	social skills/ communication training	Peer Education and Advocacy through Recreation and Leadership (PEARL)	Peer Education and Advocacy through Recreation and Leadership (PEARL)	30 h of group training over 6 months for people with severe mental health problems to serve as advocates for improving peer socialisation, recreation involvement and community inclusion	not described	not reported	not clear	Individual and group	face-to-face	not clear	not clearly described	Segregated (only for ppl with disability)	not clear	not clear	not clear	not clear	not clear	6 months	total 30 hours	see description	nr	nr	nr	nr	nr	n/a	n/a	social satisfaction and ability to get along with others	Improved social satisfaction and ability to get along with other people from baseline to post-intervention. No significant increases at 6-month follow-up	n/a
9	Rosen 1982	Masi 2011	NRCT	Social	Participation	community-dwelling individuals who seemed depressed, had experienced recent traumas, gave evidence of approaching senility, or gave other indications that they might benefit from mental health counseling	nr	Directors of six senior centers in Georgia identified eligible participants	nr	68	nr	nr	nr	nr	PD	older adults with depression, recent trauma	20	>=65 years, median=70	nr	support for social participation (e.g., social prescribing)	loneliness ints- community dwelling w SMI loneliness ints- psych disruption > traumatic birth experience loneliness ints- adults w physical/MH probs living alone loneliness ints- depressed/traumatised seniors loneliness ints- undergrads w moderate depression on BDI loneliness ints- older adults w suicidal ideation, depression, isolation loneliness ints- naval treinees w BDI > 30 or at-risk stress	Social support group	Meetings typically began with a discussion of happenings during the previous week. Intervention staff encouraged sharing of past experiences and current feelings as well as interactions among members between group sessions.	not described	not reported	not clearly described	Group (>2 people)	face-to-face	not clear	not described	Segregated (only for ppl with disability)	yes	no	no	no	no	40 to 49 weekly sessions over 12 to 15 months.	2 hours per session	see description	nr	nr	nr	nr	nr	n/a	n/a	Participants were asked if they were seldom or never lonely	Effect size: c - ns	n/a
9	Schlosser 2018	Fortuna 2020	RCT/quasi-RCT							43	nr	nr	nr	nr	PD	schizophrenia spectrum disorders	62	m=24	USA	peer support		Personalized Real-time Intervention for Motivational Enhancement (PRIME)	a mobile app consisting of a peer community, goal and achievement tracking, and cognitive behavioral-based treatment	TAU/waitlist for 12 weeks, then given option to join intervention	Community		Group (>2 people)	telehealth			Segregated (only for ppl with disability)						12 weeks	nr							n/a	n/a	Role Functioning Scale	effector to increase likelihood of future social interactions,	Trust Task, Motivation and Pleasure Self-Report Scale, , Quality of Life Scale, Dysfunctional Attitudes Scale, Beck Depression Inventory, Revised Self-Efficacy Scale, Positive and Negative Syndrome Scale
9	van Gestel-Timmermans 2012	Fuhr 2014	RCT/quasi-RCT						1337	333	168	165	nr	nr	PD	SMI	nr	nr	Netherlands	peer support		"Recovery is up to you" program	A structured program consisting of psycho-education, illness management, learning from other's experiences, social support, homework assignments) provided in a group setting over 12 weekly two hour sessions.	waitlist and TAU	Community		Group (>2 people)	face-to-face			Segregated (only for ppl with disability)						12 weekly sessions	2 hrs per session				Completion of "train the trainer course" in addition to on-the-job training (working with experienced course instructors).			n/a	n/a	Loneliness (Loneliness Scale)	no effect on loneliness (χ2=4.81, p=0.19)	QoL: Quality of Life (Manchester Short Assessment of Quality of Life, MANSA). Other psychosocial: Hope (Herth Hope Index, HHI); Self-efficacy beliefs (Mental Health Confidence Scale, MHCS); Empowerment (Dutch Empowerment Scale).
10	Armstrong 1995 -1	Walker 2013	Qualitative: interviews	Social and community	Participation	nr	nr	nr	nr	16 mentors	nr	0	nr	n/a	PD	nr	nr	nr	Canada	peer support	peer mentoring programs (no specific programs defined/described)	Peer mentoring	not described	no CG	Clinical - in/outpatient not clear	Statutory mental health settings and settings that share leadership with statutory mental health settings	Not clear	face-to-face	Peer	peers with support of staff	Not clear	yes	not clear	not clear	not clear	not clear	nr	nr		nr	nr	nr	peer	nr	see facilitators/barriers	see facilitators/barriers	see Walker 2013 tab	see Walker 2013 tab	see Walker 2013 tab
10	Besio 1993 -2	Walker 2013	Qualitative: other	Social and community	Participation	nr	nr	nr	nr	30 mentors	nr	0	nr	n/a	PD	nr	nr	nr	USA	peer support	peer mentoring programs (no specific programs defined/described)	Peer mentoring	not described	no CG	Clinical - in/outpatient not clear	Statutory mental health settings and settings that share leadership with statutory mental health settings	Not clear	face-to-face	Peer	peers with support of staff	Not clear	yes	not clear	not clear	not clear	not clear	nr	nr		nr	nr	nr	peer	nr	see facilitators/barriers	see facilitators/barriers	see Walker 2013 tab	see Walker 2013 tab	see Walker 2013 tab
10	Carlston 2001 -3	Walker 2013	Qualitative: focus groups	Social and community	Participation	nr	nr	nr	nr	6 mentors, 6 staff	nr	0	nr	n/a	PD	nr	nr	nr	USA	peer support	peer mentoring programs (no specific programs defined/described)	Peer mentoring	not described	no CG	Clinical - in/outpatient not clear	Statutory mental health settings and settings that share leadership with statutory mental health settings	Not clear	face-to-face	Peer	peers with support of staff	Not clear	yes	not clear	not clear	not clear	not clear	nr	nr		nr	nr	nr	peer	nr	see facilitators/barriers	see facilitators/barriers	see Walker 2013 tab	see Walker 2013 tab	see Walker 2013 tab
10	Chinman 2008 -4	Walker 2013	Qualitative: focus groups	Social and community	Participation	nr	nr	nr	nr	59 mentors, 34 staff	nr	0	nr	n/a	PD	nr	nr	nr	USA	peer support	peer mentoring programs (no specific programs defined/described)	Peer mentoring	not described	no CG	Clinical - in/outpatient not clear	Statutory mental health settings and settings that share leadership with statutory mental health settings	Not clear	face-to-face	Peer	peers with support of staff	Not clear	yes	not clear	not clear	not clear	not clear	nr	nr		nr	nr	nr	peer	nr	see facilitators/barriers	see facilitators/barriers	see Walker 2013 tab	see Walker 2013 tab	see Walker 2013 tab
10	Colson 2009 -5	Walker 2013	Qualitative: other	Social and community	Participation	nr	nr	nr	nr	13 mentors, 8 staff	nr	0	nr	n/a	PD	nr	nr	nr	USA	peer support	peer mentoring programs (no specific programs defined/described)	Peer mentoring	not described	no CG	Clinical - in/outpatient not clear	Statutory mental health settings and settings that share leadership with statutory mental health settings	Not clear	face-to-face	Peer	peers with support of staff	Not clear	yes	not clear	not clear	not clear	not clear	nr	nr		nr	nr	nr	peer	nr	see facilitators/barriers	see facilitators/barriers	see Walker 2013 tab	see Walker 2013 tab	see Walker 2013 tab
10	Davidson 2001 -6	Walker 2013	Qualitative: interviews	Social and community	Participation	nr	nr	nr	nr	21 participants	21	0	nr	n/a	PD	nr	nr	nr	USA	peer support	peer mentoring programs (no specific programs defined/described)	Peer mentoring	not described	no CG	Clinical - in/outpatient not clear	Statutory mental health settings and settings that share leadership with statutory mental health settings	Not clear	face-to-face	Peer	peers with support of staff	Not clear	yes	not clear	not clear	not clear	not clear	nr	nr		nr	nr	nr	peer	nr	see facilitators/barriers	see facilitators/barriers	see Walker 2013 tab	see Walker 2013 tab	see Walker 2013 tab
10	Dixon 1994 -7	Walker 2013	Case study (not multiple baseline)	Social and community	Participation	nr	nr	nr	nr	3 staff	nr	0	nr	n/a	PD	nr	nr	nr	USA	peer support	peer mentoring programs (no specific programs defined/described)	Peer mentoring	not described	no CG	Clinical - in/outpatient not clear	Statutory mental health settings and settings that share leadership with statutory mental health settings	Not clear	face-to-face	Peer	peers with support of staff	Not clear	yes	not clear	not clear	not clear	not clear	nr	nr		nr	nr	nr	peer	nr	see facilitators/barriers	see facilitators/barriers	see Walker 2013 tab	see Walker 2013 tab	see Walker 2013 tab
10	Doherty 2004 -8	Walker 2013	Qualitative: interviews	Social and community	Participation	nr	nr	nr	nr	2 mentors, 8 staff	nr	0	nr	n/a	PD	nr	nr	nr	USA	peer support	peer mentoring programs (no specific programs defined/described)	Peer mentoring	not described	no CG	Clinical - in/outpatient not clear	Statutory mental health settings and settings that share leadership with statutory mental health settings	Not clear	face-to-face	Peer	peers with support of staff	Not clear	yes	not clear	not clear	not clear	not clear	nr	nr		nr	nr	nr	peer	nr	see facilitators/barriers	see facilitators/barriers	see Walker 2013 tab	see Walker 2013 tab	see Walker 2013 tab
10	Fisk 2000 -9	Walker 2013	Case study (not multiple baseline)	Social and community	Participation	nr	nr	nr	nr	2 mentors	nr	0	nr	n/a	PD	nr	nr	nr	USA	peer support	peer mentoring programs (no specific programs defined/described)	Peer mentoring	not described	no CG	Clinical - in/outpatient not clear	Statutory mental health settings and settings that share leadership with statutory mental health settings	Not clear	face-to-face	Peer	peers with support of staff	Not clear	yes	not clear	not clear	not clear	not clear	nr	nr		nr	nr	nr	peer	nr	see facilitators/barriers	see facilitators/barriers	see Walker 2013 tab	see Walker 2013 tab	see Walker 2013 tab
10	Gates 2007 -10	Walker 2013	Qualitative: focus groups	Social and community	Participation	nr	nr	nr	nr	15 mentors	nr	0	nr	n/a	PD	nr	nr	nr	USA	peer support	peer mentoring programs (no specific programs defined/described)	Peer mentoring	not described	no CG	Clinical - in/outpatient not clear	Statutory mental health settings and settings that share leadership with statutory mental health settings	Not clear	face-to-face	Peer	peers with support of staff	Not clear	yes	not clear	not clear	not clear	not clear	nr	nr		nr	nr	nr	peer	nr	see facilitators/barriers	see facilitators/barriers	see Walker 2013 tab	see Walker 2013 tab	see Walker 2013 tab
10	Grant 2010 -11	Walker 2013	Qualitative: other	Social and community	Participation	nr	nr	nr	nr	14 mentors, 16 staff	nr	0	nr	n/a	PD	nr	nr	nr	Canada	peer support	peer mentoring programs (no specific programs defined/described)	Peer mentoring	not described	no CG	Clinical - in/outpatient not clear	Statutory mental health settings and settings that share leadership with statutory mental health settings	Not clear	face-to-face	Peer	peers with support of staff	Not clear	yes	not clear	not clear	not clear	not clear	nr	nr		nr	nr	nr	peer	nr	see facilitators/barriers	see facilitators/barriers	see Walker 2013 tab	see Walker 2013 tab	see Walker 2013 tab
10	Mancini 2005, 2009 -12	Walker 2013	Qualitative: interviews	Social and community	Participation	nr	nr	nr	nr	15 mentors	nr	0	nr	n/a	PD	nr	nr	nr	USA	peer support	peer mentoring programs (no specific programs defined/described)	Peer mentoring	not described	no CG	Clinical - in/outpatient not clear	Statutory mental health settings and settings that share leadership with statutory mental health settings	Not clear	face-to-face	Peer	peers with support of staff	Not clear	yes	not clear	not clear	not clear	not clear	nr	nr		nr	nr	nr	peer	nr	see facilitators/barriers	see facilitators/barriers	see Walker 2013 tab	see Walker 2013 tab	see Walker 2013 tab
10	Manning 1996 -13	Walker 2013	Qualitative: other	Social and community	Participation	nr	nr	nr	nr	16 mentors	nr	0	nr	n/a	PD	nr	nr	nr	USA	peer support	peer mentoring programs (no specific programs defined/described)	Peer mentoring	not described	no CG	Clinical - in/outpatient not clear	Statutory mental health settings and settings that share leadership with statutory mental health settings	Not clear	face-to-face	Peer	peers with support of staff	Not clear	yes	not clear	not clear	not clear	not clear	nr	nr		nr	nr	nr	peer	nr	see facilitators/barriers	see facilitators/barriers	see Walker 2013 tab	see Walker 2013 tab	see Walker 2013 tab
10	Meehan 2002 -14	Walker 2013	Mixed methods	Social and community	Participation	nr	nr	nr	nr	10 mentors	nr	0	nr	n/a	PD	nr	nr	nr	Australia	peer support	peer mentoring programs (no specific programs defined/described)	Peer mentoring	not described	no CG	Clinical - in/outpatient not clear	Statutory mental health settings and settings that share leadership with statutory mental health settings	Not clear	face-to-face	Peer	peers with support of staff	Not clear	yes	not clear	not clear	not clear	not clear	nr	nr		nr	nr	nr	peer	nr	see facilitators/barriers	see facilitators/barriers	see Walker 2013 tab	see Walker 2013 tab	see Walker 2013 tab
10	Moll 2009 -15	Walker 2013	Qualitative: interviews	Social and community	Participation	nr	nr	nr	nr	6 mentors, 6 staff	nr	0	nr	n/a	PD	nr	nr	nr	Canada	peer support	peer mentoring programs (no specific programs defined/described)	Peer mentoring	not described	no CG	Clinical - in/outpatient not clear	Statutory mental health settings and settings that share leadership with statutory mental health settings	Not clear	face-to-face	Peer	peers with support of staff	Not clear	yes	not clear	not clear	not clear	not clear	nr	nr		nr	nr	nr	peer	nr	see facilitators/barriers	see facilitators/barriers	see Walker 2013 tab	see Walker 2013 tab	see Walker 2013 tab
10	Mowbray 1996 -16	Walker 2013	Mixed methods	Social and community	Participation	nr	nr	nr	nr	16 mentors	nr	0	nr	n/a	PD	nr	nr	nr	USA	peer support	peer mentoring programs (no specific programs defined/described)	Peer mentoring	not described	no CG	Clinical - in/outpatient not clear	Statutory mental health settings and settings that share leadership with statutory mental health settings	Not clear	face-to-face	Peer	peers with support of staff	Not clear	yes	not clear	not clear	not clear	not clear	nr	nr		nr	nr	nr	peer	nr	see facilitators/barriers	see facilitators/barriers	see Walker 2013 tab	see Walker 2013 tab	see Walker 2013 tab
10	Paulson 1999 -17	Walker 2013	Mixed methods	Social and community	Participation	nr	nr	nr	nr	4 mentors, 4 staff	nr	0	nr	n/a	PD	nr	nr	nr	USA	peer support	peer mentoring programs (no specific programs defined/described)	Peer mentoring	not described	no CG	Clinical - in/outpatient not clear	Statutory mental health settings and settings that share leadership with statutory mental health settings	Not clear	face-to-face	Peer	peers with support of staff	Not clear	yes	not clear	not clear	not clear	not clear	nr	nr		nr	nr	nr	peer	nr	see facilitators/barriers	see facilitators/barriers	see Walker 2013 tab	see Walker 2013 tab	see Walker 2013 tab
10	Pudlinski 1998, 2001 -18	Walker 2013	Qualitative: other	Social and community	Participation	nr	nr	nr	nr	3 mentors	nr	0	nr	n/a	PD	nr	nr	nr	USA	peer support	peer mentoring programs (no specific programs defined/described)	Peer mentoring	not described	no CG	Clinical - in/outpatient not clear	Statutory mental health settings and settings that share leadership with statutory mental health settings	Not clear	face-to-face	Peer	peers with support of staff	Not clear	yes	not clear	not clear	not clear	not clear	nr	nr		nr	nr	nr	peer	nr	see facilitators/barriers	see facilitators/barriers	see Walker 2013 tab	see Walker 2013 tab	see Walker 2013 tab
10	Richard 2009 -19	Walker 2013	Qualitative: interviews	Social and community	Participation	nr	nr	nr	nr	5 mentors	nr	0	nr	n/a	PD	nr	nr	nr	Canada	peer support	peer mentoring programs (no specific programs defined/described)	Peer mentoring	not described	no CG	Clinical - in/outpatient not clear	Statutory mental health settings and settings that share leadership with statutory mental health settings	Not clear	face-to-face	Peer	peers with support of staff	Not clear	yes	not clear	not clear	not clear	not clear	nr	nr		nr	nr	nr	peer	nr	see facilitators/barriers	see facilitators/barriers	see Walker 2013 tab	see Walker 2013 tab	see Walker 2013 tab
10	Salyers 2009 -20	Walker 2013	Mixed methods	Social and community	Participation	nr	nr	nr	nr	14 participants, 16 staff	14	0	nr	n/a	PD	nr	nr	nr	USA	peer support	peer mentoring programs (no specific programs defined/described)	Peer mentoring	not described	no CG	Clinical - in/outpatient not clear	Statutory mental health settings and settings that share leadership with statutory mental health settings	Not clear	face-to-face	Peer	peers with support of staff	Not clear	yes	not clear	not clear	not clear	not clear	nr	nr		nr	nr	nr	peer	nr	see facilitators/barriers	see facilitators/barriers	see Walker 2013 tab	see Walker 2013 tab	see Walker 2013 tab
10	Silver 2004 -21	Walker 2013	Qualitative: other	Social and community	Participation	nr	nr	nr	nr	12 mentors	nr	0	nr	n/a	PD	nr	nr	nr	USA	peer support	peer mentoring programs (no specific programs defined/described)	Peer mentoring	not described	no CG	Clinical - in/outpatient not clear	Statutory mental health settings and settings that share leadership with statutory mental health settings	Not clear	face-to-face	Peer	peers with support of staff	Not clear	yes	not clear	not clear	not clear	not clear	nr	nr		nr	nr	nr	peer	nr	see facilitators/barriers	see facilitators/barriers	see Walker 2013 tab	see Walker 2013 tab	see Walker 2013 tab
10	Straughan 2006 -22	Walker 2013	Qualitative: interviews	Social and community	Participation	nr	nr	nr	nr	19 participants, 19 staff	19	0	nr	n/a	PD	nr	nr	nr	UK	peer support	peer mentoring programs (no specific programs defined/described)	Peer mentoring	not described	no CG	Clinical - in/outpatient not clear	Statutory mental health settings and settings that share leadership with statutory mental health settings	Not clear	face-to-face	Peer	peers with support of staff	Not clear	yes	not clear	not clear	not clear	not clear	nr	nr		nr	nr	nr	peer	nr	see facilitators/barriers	see facilitators/barriers	see Walker 2013 tab	see Walker 2013 tab	see Walker 2013 tab
10	Truman 2002 -23	Walker 2013	Qualitative: other	Social and community	Participation	nr	nr	nr	nr	34 participants, 18 staff	34	0	nr	n/a	PD	nr	nr	nr	UK	peer support	peer mentoring programs (no specific programs defined/described)	Peer mentoring	not described	no CG	Clinical - in/outpatient not clear	Statutory mental health settings and settings that share leadership with statutory mental health settings	Not clear	face-to-face	Peer	peers with support of staff	Not clear	yes	not clear	not clear	not clear	not clear	nr	nr		nr	nr	nr	peer	nr	see facilitators/barriers	see facilitators/barriers	see Walker 2013 tab	see Walker 2013 tab	see Walker 2013 tab
10	Yuen 2003 -24	Walker 2013	Qualitative: interviews	Social and community	Participation	nr	nr	nr	nr	3 mentors, 34 participants	34	0	nr	n/a	PD	nr	nr	nr	Australia	peer support	peer mentoring programs (no specific programs defined/described)	Peer mentoring	not described	no CG	Clinical - in/outpatient not clear	Statutory mental health settings and settings that share leadership with statutory mental health settings	Not clear	face-to-face	Peer	peers with support of staff	Not clear	yes	not clear	not clear	not clear	not clear	nr	nr		nr	nr	nr	peer	nr	see facilitators/barriers	see facilitators/barriers	see Walker 2013 tab	see Walker 2013 tab	see Walker 2013 tab
10	Mowbray 1998 -25	Walker 2013	Qualitative: interviews	Social and community	Participation	nr	nr	nr	nr	11 mentors	nr	0	nr	n/a	PD	nr	nr	nr	USA	peer support	peer mentoring programs (no specific programs defined/described)	Peer mentoring	not described	no CG	Clinical - in/outpatient not clear	Statutory mental health settings and settings that share leadership with statutory mental health settings	Not clear	face-to-face	Peer	peers with support of staff	Not clear	yes	not clear	not clear	not clear	not clear	nr	nr		nr	nr	nr	peer	nr	see facilitators/barriers	see facilitators/barriers	see Walker 2013 tab	see Walker 2013 tab	see Walker 2013 tab
10	Sledge 2011	White 2020, Pitt 2013 (not extracted)	RCT/quasi-RCT							93	48	45	nr	nr	PD	schizophrenia, schizoaffective disorder, psychotic disorder not otherwise specified, bipolar disorder or major depressive disorder with or without psychotic features	nr	nr	USA	peer support		Peer support	Community-based peer recovery mentor plus TAU	TAU - community mental health care	Clinical - outpatient		Group (>2 people)	face-to-face			Segregated (only for ppl with disability)						nr	nr									1) Social Functioning: The Social Functioning Scale [46] 2) Social network support: Sense of Community Index [49]	only reported at meta-analysis level	1) Hospitalisationb: No. of readmissions, Days in hospitalb, Hospitalisedb 2) Overall psychiatric symptoms: Brief Psychiatric Rating Scale (BPRS) [24] 3) Hope: The Dispositional Hope Scale [47] 4) Satisfaction with services: Mental Health Statistics Improvement Programme (MHSIP) [48] 5) Wellbeing: 36 item Short Form Health Survey (SF-36) [34]
10	Rogers 2016	White 2020	RCT/quasi-RCT							113	63	50	nr	nr	PD	SMI/court ordered for treatment because of a psychiatric crisis	nr	nr	USA	peer support		Peer support	Individual peersupported social inclusion and recovery support plus TAU	TAU - Peerprovided services (excluding individual peer support; e.g. social activities, educational courses, group peer support)	Clinical - outpatient		Group (>2 people)	face-to-face			Segregated (only for ppl with disability)						nr	nr									1) Social network support: Interpersonal Support Evaluation List [64]	only reported at meta-analysis level	1) Overall psychiatric symptoms: BASIS-R [58] 2) Recovery: Recovery Assessment Scale [65] 3) Quality of Life: Brief Quality of Life (BQOL; Lehman, 1988) [26]
10	Mahlke 2017	White 2020	RCT/quasi-RCT							226	114	112	nr	nr	PD	out-patient services with primary diagnosis of schizophrenia and related disorders, affective disorders, or personality disorder	nr	nr	Germany	peer support		Peer support	Community-based peer support for individual recovery plus TAU	TAU - in-patient and out-patient mental health as usual	Clinical - outpatient		Group (>2 people)	face-to-face			Segregated (only for ppl with disability)						nr	nr									3) Social functioningb: Global Assessment of Functioning (GAF) Scale [29]b	only reported at meta-analysis level	1) Overall psychiatric symptomsb: Clinical Global Impression – Severity scale [72] 2) Quality of Lifeb: Modular System for Quality of Life and EuroQol Questionnaire EQ. 5D [61]b 3) Empowermentb: General Self-Efficacy Scale [73]b 4) Hospitalisationb: Days in hospitalb, Hospitalisedb
10	Yamaguchi 2017	White 2020, Fortuna 2020	RCT/quasi-RCT							53	26	27	nr	nr	PD	using outpatient psychiatric clinic or psychiatric hospital	78	nr	Japan	peer support		Peer support	Peer supported shared decision-making plus TAU	TAU - medical consultation	Clinical - outpatient		Group (>2 people)	face-to-face			Segregated (only for ppl with disability)						nr	nr									1) Social Functioningb: Global Assessment of Functioning (GAF) Scale [29]b	only reported at meta-analysis level	1) Overall psychiatric symptomsb: The Brief Psychiatric Rating Scale (BPRS) [24]b 2) Empowermentb: Patient Activation Measure [57]b 3) Working Allianceb: Scale To Assess Therapeutic Relationships in Community Mental Health Care (STAR) – Clinician & Patient versions [75] b
10	Johnson 2018	White 2020	RCT/quasi-RCT							441	221	220	nr	nr	PD	recent psychiatric crisis and on caseload of crisis resolution teams	nr	nr	England	peer support		Peer support	Peer-supported self-management plus TAU	TAU – community mental health services plus selfmanagement workbook	Clinical - outpatient		Group (>2 people)	face-to-face			Segregated (only for ppl with disability)						nr	nr									1) Social network support b: Lubben Social Network Scale [77]b	SMD=0.17 (-0.08, 0.41)	1) Overall psychiatric symptomsb: Brief Psychiatric Rating Scale [24]b 2) Recovery b: Illness Management & Recovery Scale b (patient version) [56]; Questionnaire on the Process of Recovery (QPR) [78] 3) Satisfaction with servicesb: Client Satisfaction Questionnaire [79]b 4) Hospitalisation: Community tenure (days)
10	Thomas 2016	Fortuna 2020	NRCT-No control							10	nr	0	nr	n/a	PD	schizophrenia	90	m=43	Australia	peer support		Self-Management and Recovery Technology (SMART)	An interactive website containing modules on recovery, managing stress, health, oneself, relationships, empowerment, and life, videos of people with lived experience and mental health professionals; participants accessed SMART via tablet during 80 in-person sessions with a mental health worker	no CG	Clinical - outpatient	accessed the website initially with a MH worker	Group (>2 people)	computer based			Segregated (only for ppl with disability)						3m, frequency nr	nr							n/a	n/a	Friendship Scale,	significant decrease in perceived alienation	Questionnaire for the Process of Recovery, Schizophrenia Hope Scale, Positive and Negative Syndrome Scale, Depression Anxiety Stress Scale, Assessment of Quality of Life-8 Dimension, Internalized Stigma of Mental Illness Scale, Generalized Self-Efficacy Scale, perceptions of intervention
10	Williams 2018	Fortuna 2020	Qualitative: interviews							36	nr	nr	nr	nr	PD	SMI	33	m=41	Australia	peer support		Self-Management and Recovery Technology (SMART)	Use of SMART website for 3 months	no CG	Community	no detail given	Group (>2 people)	computer based			Segregated (only for ppl with disability)						3m, frequency nr	nr							n/a	n/a	Top themes from interviews	“knowing I'm not alone,” “being inspired,” “believing recovery is possible”	n/a
10	Cook 2012	Fuhr 2014	RCT/quasi-RCT							555	276	279	nr	nr	PD	SMI	nr	nr	USA	peer support		Illness self-management intervention (WRAP)	Groups of 5-12 people per session	waitlist and TAU	Clinical - outpatient		Group (>2 people)	face-to-face			Segregated (only for ppl with disability)						8 weekly sessions	2.5 hr per session				WRAP Mental Health Recovery Educator certificate in addition to a 2.5 days refresher session prior to study.			n/a	n/a	Environment QoL	significant improvements in quality of life related to the environment (WHO-QOL: 0.39, p=0 .001)	Clinical: Symptoms (Brief Symptom Inventory, BSI). QoL: Quality of Life, Environment (Quality of Life Brief Instrument, WHOQOL-BREF). Other psychosocial: Hopefulness (Hope Scale, HS).
10	Klein 1998	White 2020	RCT/quasi-RCT							61	10	51	nr	nr	PD	Community MH centre users requiring intensive case management	nr	nr	USA	peer support		Peer support	Peer-supported community enablement plus TAU	TAU/ intensive case management	Clinical - outpatient		Group (>2 people)	face-to-face			Segregated (only for ppl with disability)						nr	nr									1) Social functioning: Global Assessment of Functioning (GAF) Scale [29] 2) Social network support: Lehman’s Quality of Life – Friends subscale [26]	only reported at meta-analysis level	1) Hospitalisation: Days in hospital 2) Quality of Life: Lehman’s Quality of Life (QOL) [26] 3) Wellbeing: Lehman’s Quality of Life – Health subscale [26]
10	Hunkeler 2000	White 2020	RCT/quasi-RCT							302	123	179	nr	nr	PD	dual diagnosis community mental health centre users	nr	nr	USA	peer support		Peer support	Peer support via telephone contact or face-to-face plus nurse telehealth care plus nurse telehelthcare plus TAU	1) Nurse teleheath care plus TAU 2) TAU – usual physician care	Clinical - outpatient		Group (>2 people)	face-to-face			Segregated (only for ppl with disability)						nr	nr									1) Social functioning: SF − 12 Mental and Physical Composite Scales [34]	only reported at meta-analysis level	1) Depression: Hamilton Depression Rating Scale- self report version [32]; Beck depression Inventory [33] 2) Satisfaction with services: Patient satisfaction with treatment scale – no information provided
10	Craig 2004	White 2020, Pitt 2013	RCT/quasi-RCT							45	24	21	nr	nr	PD	major depressive disorder/dysthymia or SSR prescription users	nr	nr	England	peer support		Peer support	Consumer Health Care Assistant plus TAU	TAU - case management from Assertive Outreach Team	Clinical - outpatient		Group (>2 people)	face-to-face			Segregated (only for ppl with disability)						nr	nr									1) Social functioning b: Life Skills Profile [36]b 2) Social network support b: Significant others scale (SOS) [37]	SMD=-0.14 (-0.75, 0.48)	1) Hospitalisationb: Days in hospitalb, Hospitalised 2) Satisfaction with services: Verona Service Satisfaction Scale (VSSS) [38]b 3) Service engagement: Number of missed (DNA) appointments with services.
11	Schneider 2016	Louw 2019	Mixed methods	Social	Participation	to participate in the ACEE program each participant had to follow an Individualized Program Plan (IPP) together with a transition plan while still in high school.	nr	nr	nr	76	76	0	nr	n/a	ID	severity nr	male and female, %nr	17-31 years	Canada	transition program	transition and social skills: Community Employment and Education (ACEE)	transition and social skills: Community Employment and Education (ACEE)	not described further apart from the fact that participants had to follow an Individualized Program Plan (IPP) together with a transition plan while still in high school	no CG	not reported	not described apart from transition from high school setting	Not clear	face-to-face	not clear	not clearly described	Not clear	not clear	not clear	not clear	not clear	not clear	10 months	nr	not described	nr	nr	nr	nr	nr	n/a	n/a	seeing friends and leisure participation	84% reported spending time with friends several times a month, and 76% engaging in leisure activities after the programme prepared them for employment and further education. Learned new ways of communication and social networking, by using social media to connect with friends and playing video games	n/a
11	Retherford 2015	Pallathra 2019	NRCT-No control	Social	Capacity	nr	nr	nr	nr	nr	nr	nr	nr	nr	ASD	severity not reported	nr	nr	nr	transition program	Camp Campus (transition program)	Camp Campus (transition program)	A college campus camp experience	no CG	Post-secondary school education	college campus	Group (>2 people)	face-to-face	not clear	not clearly described	Not clear	not clear	not clear	not clear	not clear	not clear	7 days	15 hours per day	not described	nr	nr	nr	nr	nr	??	"showed the weakest findings by only reporting parent and student survey data describing their experience with the program"	n/a	n/a	n/a
11	Ness 2013	Lorenc 2018	NRCT-No control	Social and community	Other	nr	nr	nr	nr	3 mentees, 3 mentors	6	0	nr	nr	ASD	ASD without ID	67	m=22; 19-25 years	USA	transition program	peer mentoring for academic work and goal setting	peer mentoring	peer mentoring for academic work and goal setting	no CG	Post-secondary school education	university setting	Individual	face-to-face	Peer	not clearly described	Not clear	not clear	not clear	not clear	not clear	not clear	nr	nr	see description	nr	nr	nr	nr	nr	n/a	n/a	n/a	n/a	grade point average
11	Ashburner 2018	Nguyen 2020	Qualitative: other	Social and community	Capacity and participation	nr	nr	nr	nr	11 mentees, 7 mentors	18	0	nr	n/a	ASD	sev nr	nr	17-30 years	Australia	peer support	peer mentoring programs (specific programs not defined)	Peer mentoring	not described	no CG	not reported	for post-school transition	Not clear	face-to-face	Peer	not described	Not clear	yes	not clear	not clear	not clear	not clear	nr	nr		nr	nr	nr	peer	nr	n/a	n/a	1. social events 2. Friendship 3. Meeting others with ASD	1. Some mentees took the initiative to organize the social events 2. "There's a lot of friendships … that probably would not have been made otherwise. … It's easy to make a friend online but it's sometimes a lot different to making a friend in the outside world.”– Mentor (Ashburner et al., 2018, p.274) 3. Some mentees never met another person with ASD until they were in the programme	n/a
11	Hotez 2018	Nguyen 2020	Mixed methods	Social and community	Capacity and participation	nr	nr	nr	nr	24 mentees, 2 mentors	26	0	nr	n/a	ASD	sev nr	nr	17-28 years	USA	peer support	peer mentoring programs (specific programs not defined)	Peer mentoring	not described	no CG	Post-secondary school education	incoming/current college students	Not clear	face-to-face	Peer	not described	Not clear	yes	not clear	not clear	not clear	not clear	nr	nr		nr	nr	nr	peer	nr	1. learning to self-advocate	1. Mentees generally knew about the importance of self-advocacy, but they did not know how to apply these skills such as asking their professors for accommodations. Mentors can be a helpful resource to act out roleplay scenarios for mentees to develop skills, such as self-advocacy.	1. Meeting others with ASD 2. Transition from mentee to mentor	1a. Some mentees never met another person with ASD until they were in the programme. 1b. “I learned there [are] a lot of people out there who have the same interests like me, who think like me, I think that is something I should keep in mind as I grow up.”–Mentee (Hotez et al., 2018, p.10) 2. By the end of the programme, some mentees expressed interest in becoming mentors for the PM programme	1. self-accepance
11	Curtin 2016	Nguyen 2020	Mixed methods	Social and community	Capacity and participation	nr	nr	nr	nr	9 mentees, 9 mentors	18	0	nr	n/a	ASD	sev nr	nr	19-33 years	USA	peer support	peer mentoring programs (specific programs not defined)	Peer mentoring	not described	no CG	Post-secondary school education	linking college/graduate students and teens with ASD	Not clear	face-to-face	Peer	not described	Not clear	yes	not clear	not clear	not clear	not clear	nr	nr		nr	nr	nr	peer	nr	n/a	n/a	n/a	n/a	n/a
11	Gillespie-Lynch 2017	Nguyen 2020	Mixed methods	Social and community	Capacity and participation	nr	nr	nr	nr	30 mentees, 0 mentors	30	0	nr	n/a	ASD	sev nr	nr	20-24 years	USA	peer support	peer mentoring programs (specific programs not defined)	Peer mentoring	not described	no CG	Post-secondary school education	College students	Not clear	face-to-face	Peer	not described	Not clear	yes	not clear	not clear	not clear	not clear	nr	nr		nr	nr	nr	peer	nr	n/a	n/a	Transition experience	"I think the biggest (idea)... we can take away from (the mentorship program) this semester is in general is not to be ashamed or embarrassed about our disability. It's only a part of who you are.” –Mentee (Gillespie-Lynch et al., 2017, p.9) “Many students in the current study reported that their favorite part of the mentorship program remained the opportunities it provided to socialize with peer…	n/a
11	Ames 2015	Nguyen 2020	Mixed methods	Social and community	Capacity and participation	nr	nr	nr	nr	23 mentees, 23 mentors	46	0	nr	n/a	ASD	sev nr	nr	18-27 years	Canada	peer support	peer mentoring programs (specific programs not defined)	Peer mentoring	not described	no CG	Post-secondary school education	university students	Not clear	face-to-face	Peer	not described	Not clear	yes	not clear	not clear	not clear	not clear	nr	nr		nr	nr	nr	peer	nr	n/a	n/a	social events	Mentees described how they enjoyed having the social events with peers such as board games night, sports, pizza parties and karaoke	n/a
11	Hamilton 2016	Nguyen 2020	Mixed methods	Social and community	Capacity and participation	nr	nr	nr	nr	7 mentors	7	0	nr	n/a	ASD	sev nr	nr	21-30 years	Australia	peer support	peer mentoring programs (specific programs not defined)	Peer mentoring	not described	no CG	Post-secondary school education	university students	Not clear	face-to-face	Peer	not described	Not clear	yes	not clear	not clear	not clear	not clear	nr	nr		nr	nr	nr	peer	nr	n/a	n/a	n/a	n/a	n/a
11	Roberts 2017	Nguyen 2020	Qualitative: other	Social and community	Capacity and participation	nr	nr	nr	nr	9 mentees, 9 mentors	18	0	nr	n/a	ASD	sev nr	nr	19-33 years	Canada	peer support	peer mentoring programs (specific programs not defined)	Peer mentoring	not described	no CG	Post-secondary school education	university students	Not clear	face-to-face	Peer	not described	Not clear	yes	not clear	not clear	not clear	not clear	nr	nr		nr	nr	nr	peer	nr	1. communication strategies 2. self-advocacy	1. mentees were able to practice strategies on how to approach their peers in a lecture 2. “The mentees had to learn to self-advocate. The self-advocating mentee in the current study was one who learned to express and share his/her ideas; and to communicate with his/her mentor within the mentorship meetings.” (Roberts & Birmingham, 2017, p.1048) 2b. “the mentees in the present study, who develope…	transition	“However, as relationships developed, the meetings became less structured and more mentee-led, which provided “more opportunities for the mentees to speak up” –Mentor (Roberts & Birmingham, 2017, p.1043)	achieving goals
11	Siew 2017	Nguyen 2020	Mixed methods	Social and community	Capacity and participation	nr	nr	nr	nr	10 mentees, 10 mentors	20	0	nr	n/a	ASD	sev nr	nr	17-20 years	Australia	peer support	peer mentoring programs (specific programs not defined)	Peer mentoring	not described	no CG	Post-secondary school education	university students	Not clear	face-to-face	Peer	not described	Not clear	yes	not clear	not clear	not clear	not clear	nr	nr		nr	nr	nr	peer	nr	n/a	n/a	1. Meeting others with ASD 2. social connectedness 3. transition	1. Some mentees never met another person with ASD until they were in the programme. 2. “Participants cited feelings of social connectedness and support as the aspects of the program they most enjoyed.” (Siew et al., 2017, p.12) 3. “participants recognised the flexibility of the program as a strength, as it enabled the program to be tailored to meet each individual's needs. This flexibility is a k…	n/a
11	Martin 2017	Nguyen 2020	Mixed methods	Social and community	Capacity and participation	nr	nr	nr	nr	12 mentees, 12 mentors	24	0	nr	n/a	ASD	sev nr	nr	nr	UK	peer support	peer mentoring programs (specific programs not defined)	Peer mentoring	not described	no CG	not reported	not described	Not clear	face-to-face	Peer	not described	Not clear	yes	not clear	not clear	not clear	not clear	nr	nr		nr	nr	nr	peer	nr	1. communication strategies	1. mentees were able to practice strategies on how to approach their peers in a lecture 1b. “It gives the mentee a safe way to practice social interaction without fear of the consequences of saying something wrong that you would have with family, friends or work colleagues. Young people with autism can become very anxious even in the simplest of social interactions at times, so having a safe plac…	n/a	n/a	achieving goals
12	Bigby 2011	Schepens 2018	Qualitative: focus groups	Community	Participation	aged > 45, supported employee	nr	nr	nr	Participants w/ ID: 12 Focus group participants: staff from disability accommodation (n=7) and employment services (n=7), members of mainstream activity programs for older people (n=4), family members (n=5), and supported employees (n=12, 2 focus groups of 6 people)	12	0	nr	n/a	ID	nr	male & female (%nr)	>45	Australia	transition program	Support for positive social interactions with people in mainstream places (community group); transition to retirement Retirement Retirement	Transition-to-retirement	The study aimed to identify the possibilities and barriers to retirement for older employees in supported employment services	no CG	Vocational training/work setting	not clear - appears from disability vocational support setting	Group (>2 people)	face-to-face	not clear	nr	Not clear	yes	not clear	not clear	not clear	not clear	n/a	n/a	n/a	nr	nr	nr	nr	nr	n/a	n/a	interpersonal relationships, social inclusion, self-determination	mixed effects - see barriers	emotional wellbeing
12	Craig 2015	Bigby 2018, Schepens 2018	Qualitative: other	Community	Participation	All interested in joining a community‐based activity + members of community groups	nr	nr	nr	5	5	0	nr	n/a	ID	moderate ID	nr	48-62 years, m=56.2	Australia	transition program	Community group	Transition‐to‐Retirement and Mentoring programme	study sought to identify pathways to active participation in community groups that aligned with the person's individual interests, explore enabling or constraining factors, and consider implications	no CG	Community	mainstream community group	Group (>2 people)	face-to-face	Community members	not clearly reported	Not clear	not clear	not clear	not clear	not clear	not clear	Observation over 10 months, but not clear how often people participated in groups	nr	see description	nr	nr	nr	nr	nr	n/a	n/a	1. intimate relationships 2. Social inclusion 3. Rights awareness	1. positive effect 2. positive effect 3. positive effect From Bigby 2018: 3 of the 5 cases met the criteria of active participation; being afforded equal membership status, members working together to achieve common goals around a shared activity. Factors affecting active participation were positive leadership response to inclusion, participants with intellectual disability who had friendly dispo…	n/a
13	Wilson 2013	Roche 2019	Systematic review	Community	Participation	adult men, interventions targeting social belonging	nr	ERIC, PsychINFO, Scopus, Summon, Google Scholar, and Web of Knowledge	nr	nr	nr	nr	nr	nr	PD	adult men	100	nr	Australia	community group participation	Men's shed interventions/programs	Men’s Sheds	Men’s Sheds “community-based male-friendly places where men connect with other members of their communities, while simultaneously providing opportunities to learn practical skills and develop new interests” pp. 452 (Australian Men’s Shed Association 2011a, 2011b; Men’s sheds Australia, 2011).	nr	Community	Men's shed	Group (>2 people)	face-to-face	Community members	Men's shed participants	Integrated (>=1 ppl without disability)	yes	yes	no	no	no	n/a	n/a	see description	nr	nr	nr	nr	nr	n/a	n/a	Learning, wellbeing, participation, mentoring	Findings grouped into 5 key areas: 1) adult learning; 2) health and well-being; 3) meaningful participation; 4) mentoring; 5) conceptual frameworks. Health and well-being (3 papers only) - enhance subjective self of well-being, in particular for men with mental health problems and substance addictions	n/a
13	Stancliffe 2015, Bigby 2014, Wilson 2013	Bigby 2018, Petroutsou 2007, Schepens 2018	Multi-methods	Community	Participation	older people w ID attending day/work programs	nr	nr	nr	58	29	29	nr	nr	ID	69.0% had mild-mod ID, the remaining participants had mental health (n=2), physical (n=9), vision (n=2), hearing (n=1) or ABI (n=4)	72.4138	m=55.6	Australia	community group participation	Support for positive social interactions with people in mainstream places (community group); transition to retirement Retirement Retirement	Community group	Dropping a day at work/day programme to attend a community group with trained mentors. The intervention aimed to enable older people with IDD to reduce attendance at work/day programme by one day per week in order to join a community group. Existing members of the community groups who did not have IDD were trained to provide support and guidance to people with IDD facilitating their participation…	Continuing work/day programme as usual	Community	existing community groups	Group (>2 people)	face-to-face	Community members	community members in existing community groups	Integrated (>=1 ppl without disability)	yes	yes	no	no	community members in existing community groups	nr	nr	see description	nr	nr	members of community groups were trained (specific elements not described)	community members	nr	n/a	n/a	Self-report: 1. UCLA Loneliness Scale (n = 20) 2. Modified Worker Loneliness Questionnaire (MWLQ) Aloneness (n=45 3. Modified Worker Loneliness Questionnaire (MWLQ) Social Satisfaction (n=46) Proxy report: 4. Community group participation Social contact	1-2. There was no significant group difference for UCLA Loneliness Scale and MWLQ Aloneness 3. Intervention participants (M = 11.43, SD = 0.95) were significantly more socially satisfied at post-test than the comparison group (M = 10.17, SD = 1.90) (p < .001) Hedges g = 0.83, 95%CI: 0.29, 1.36 4. Intervention participants’ participation in community groups was significantly increased at post-test…	Self report: 1. The Glasgow Depression Scale (GDS) (n = 47) 2. SF36 Physical-related Quality of Life (n = 34) 3. SF36 Mental-related Quality of Like (n = 34) Proxy report: 4. The Glasgow Depression Scale (GDS) (n = 36) 5. Mini Psychiatric Assessment Schedule for Adults Developmental Disabilities Depression Checklist (Mini PAS-ADD) (n = 42) 6. Mini Psychiatric Assessment Schedule for Adults Develo…
13	Wilson 2015	Bigby 2018	Mixed methods	Community	Participation	older people w ID attending day/work programs	nr	nr	nr	subset of Stancliffe 2015 study	nr	nr	nr	nr	ID	nr	nr	older people	Australia	community group participation	Support for positive social interactions with people in mainstream places (community group); transition to retirement Retirement Retirement	Community group: Men's shed	Mainstream community group participation with the support of trained community members as active mentors. Community group reflected individual’s interest, which was gender specific (Men's Shed). Supported convivial encounters with people without disability in group context	no CG	Community	mainstream community group	Group (>2 people)	face-to-face	Community members	community members in existing community groups	Integrated (>=1 ppl without disability)	yes	yes	no	no	community members in existing community groups	nr	nr	nr	nr	nr	members of community groups were trained (specific elements not described)	community members	nr	n/a	n/a	social satisfaction mentor experience	Significant post-test increase in social satisfaction for those engaged with Men’s Sheds. Mentors expressed a willingness to include people with disability in the Shed and also reported that they felt that they had themselves benefitted from being a mentor	QoL
14	Hillier 2012	Lorenc 2018	NRCT-No control	Social and community	Capacity and participation	nr	nr	nr	nr	22	22	nr	nr	nr	ASD	ASD without ID	82	m=18	USA	music	Music program	Music program (Soundscape)	creative sound exploration, composition and improvisation. The intervention aimed to improve social functioning and general wellbeing	no CG	Clinical - in/outpatient not clear	not clearly defined, but states as a therapy so assuming in a clinical setting	Not clear	face-to-face	not clear	not clearly described	Segregated (only for ppl with disability)	yes	no	no	no	no	nr	nr	creative sound exploration, composition and improvisation. The intervention aimed to improve social functioning and general wellbeing	nr	nr	nr	nr	nr	n/a	n/a	index of peer relations (parent and self report)	positive effects (stats nr, sig)	rosenberg self esteem scale STAI
14	Clift 28 2011	Williams 2018	NRCT-No control						508	42	42	0	nr	n/a	PD	"community mental health service users"	26	m=60	UK	music		Choir singing	community choir facilitated by singing instructor	no CG	Community		Group (>2 people)	face-to-face	not clear	singing instructor	Segregated (only for ppl with disability)						7 months	frequency and session length nr							n/a	n/a	n/a	n/a	Mental distress (CORE-OM)
14	Petchkovsky 30 2013	Williams 2018	NRCT							32	21	11	nr	nr	PD	Major depressive disorder	9	m=60	Australia	music		Choir singing	choir directed by music therapist for eight weeks	waitlist	Community		Group (>2 people)	face-to-face	Clinician	music therapist	Segregated (only for ppl with disability)						8 weeks	frequency and session length nr							n/a	n/a	n/a	n/a	1. BDI 2. QoL
14	Grocke 21 2014	Williams 2018	RCT/quasi-RCT							73	48	25	nr	nr	PD	"community mental health service users"	40	nr	Australia	music		Choir singing	cross-over design where participants alternated between the group singing condition facilitated by four music therapists as well as composing songs with participants and standard care	waitlist	Community		Group (>2 people)	face-to-face	not clear	singing instructor	Segregated (only for ppl with disability)						13 weeks	frequency and session length nr							n/a	n/a	n/a	n/a	1. mental health symptoms (brief symptom inventory) 2. QoL
14	Sun 31 2016	Williams 2018	NRCT							210	108	102	nr	nr	PD	"community mental health service users"	32	m=46	Australia	music		Choir singing	weekly singing groups facilitated by instructors	waitlist	Community		Group (>2 people)	face-to-face	not clear	singing instructor	Segregated (only for ppl with disability)						weekly for 18 months	session length nr							n/a	n/a	n/a	n/a	indigenous risk impact screen (psychological distress)
14	Clift 11 2017	Williams 2018	NRCT-No control							26	26	0	nr	n/a	PD	"community mental health service users"	27	m=55	UK	music		Choir singing	community choir facilitated by singing instructor	no CG	Community		Group (>2 people)	face-to-face	not clear	singing instructor	Segregated (only for ppl with disability)						6 months	frequency and session length nr							n/a	n/a	n/a	n/a	1. Mental health symptoms (CORE-10) 2. Mental wellbeing
14	Williams 29,37 2018	Williams 2018	Multi-methods							59	34 in IG, 25 in qual component	25	nr	nr	PD	"community mental health service users"	49	m=46	Australia	music		Choir singing	community choir facilitated by singing instructor	creative writing group	Community		Group (>2 people)	face-to-face	not clear	singing instructor	Segregated (only for ppl with disability)						15 months	frequency and session length nr							n/a	n/a	n/a	n/a	warwick-edinburgh mental wellbeing
14	Bailey35 2002	Williams 2018	Qualitative: interviews							7	7	0	nr	nr	PD	homeless w substance use or MH issues	100	m=52	Canada	music		Choir singing	choir for homeless people	not clear if there was a CG	Community		Group (>2 people)	face-to-face	not clear	not described	Segregated (only for ppl with disability)						nr	nr							see themes/findings summary	see themes/findings summary	see themes/findings summary	see themes/findings summary	see themes/findings summary
14	Bailey36 2005	Williams 2018	Qualitative: interviews							8	8	0	nr	nr	PD	homeless w substance use or MH issues	75	m=52	Canada	music		Choir singing	choir for homeless people	not clear if there was a CG	Community		Group (>2 people)	face-to-face	not clear	not described	Segregated (only for ppl with disability)						nr	nr							see themes/findings summary	see themes/findings summary	see themes/findings summary	see themes/findings summary	see themes/findings summary
14	Dingle 20 2013	Williams 2018	Qualitative: interviews							21	21	0	nr	nr	PD	"community mental health service users"	43	m=47	Australia	music		Choir singing	community choir for people with chronic MH conditions	not clear if there was a CG	Community		Group (>2 people)	face-to-face	not clear	not described	Segregated (only for ppl with disability)						nr	nr							see themes/findings summary	see themes/findings summary	see themes/findings summary	see themes/findings summary	see themes/findings summary
14	Plumb 38 2017	Williams 2018	Qualitative: interviews							10	10	0	nr	nr	PD	"community mental health service users"	nr	nr	UK	music		Choir singing	community choir	not clear if there was a CG	Community		Group (>2 people)	face-to-face	not clear	not described	Not clear						nr	nr							see themes/findings summary	see themes/findings summary	see themes/findings summary	see themes/findings summary	see themes/findings summary
14	Shakespeare 39 2017	Williams 2018	Qualitative: interviews							20	20	0	nr	nr	PD	"community mental health service users"	30	m=20	UK	music		Choir singing	community choir	not clear if there was a CG	Community		Group (>2 people)	face-to-face	not clear	not described	Not clear						nr	nr							see themes/findings summary	see themes/findings summary	see themes/findings summary	see themes/findings summary	see themes/findings summary
14	Liu 2013	Geretsegger 2017	RCT/quasi-RCT	Social	Capacity	nr	nr	nr	nr	30	15	15	nr	nr	PD	chronic schizophrenia in recession	56.6667	m=42.9	nr	music	Music interventions	Group receptive and recreative music therapy	Group receptive and recreative music therapy, and OrN music therapy	Standard care	Clinical - inpatient	inpatient	Not clear	face-to-face	not clear	not described	Segregated (only for ppl with disability)	not clear	no	no	no	no	2 X week for 16 weeks	45 minutes per session		nr	nr	nr	nr	nr	n/a	n/a	n/a	n/a	Cognitive functioning, abstract thinking: Wisconsin Card Sorting Test (WCST; Heaton 1993).
14	Ceccato 2009	Geretsegger 2017	RCT/quasi-RCT	Social	Capacity	nr	nr	nr	nr	67	37	30	nr	nr	PD	schizophrenia	61.194	20-60 years	nr	music	Music interventions	Group music therapy	Group music therapy: Sound Training Attention and Memory (STAM)	Standard care	Clinical - in/outpatient not clear	in and outpatient	Group (>2 people)	face-to-face	not clear	not described	Segregated (only for ppl with disability)	yes	no	no	no	no	1 session per week X 16 weeks	nr		nr	nr	nr	nr	nr	n/a	n/a	n/a	n/a	1. Cognitive functioning: attention 2. Cognitive functioning: Vigilance and attention 3. Cognitive functioning: Memory 4. Cognitive functioning: abstract thinking
14	Qu 2012	Geretsegger 2017	RCT/quasi-RCT	Social	Capacity	nr	nr	nr	nr	58	29	29	nr	nr	PD	schizophrenia	74.1379	m=31.6	nr	music	Music interventions	Group music appreciation and song singing	Group music appreciation and song singing in addition to standard care. The intervention is combined with token rewards.	Standard care	Clinical - inpatient	inpatient	Group (>2 people)	face-to-face	not clear	not described	Segregated (only for ppl with disability)	yes	no	no	no	no	2 X day for 16 weeks	1.5 hr per session		nr	nr	nr	nr	nr	n/a	n/a	Unable to use - insufficient data: Social functioning: Inpatient Psychiatric Rehabilitation Outcome Scale (IPROS).	n/a	Mental state, negative symptoms: Scale for the Assessment of Negative Symptoms (SANS; Andreasen 1982).
14	Cha 2012	Geretsegger 2017	RCT/quasi-RCT	Social	Capacity	nr	nr	nr	nr	60	30	30	nr	nr	PD	schizophrenia	nr	nr	nr	music	Music interventions	Receptive music therapy	Receptive music therapy: song discussion, music reminiscence, musical synchronisation, and music and imagery.	Standard care	Clinical - inpatient	inpatient	Not clear	face-to-face	not clear	not described	Segregated (only for ppl with disability)	not clear	no	no	no	no	4 weeks, frequency nr	nr		nr	nr	nr	nr	nr	n/a	n/a	n/a	n/a	1. Cognitive functioning: Memory 2. Cognitive functioning: abstract thinking
14	Wen 2005	Geretsegger 2017	RCT/quasi-RCT	Social	Capacity	nr	nr	nr	nr	30	16	14	nr	nr	PD	schizophrenia	70	15-50 years	nr	music	Music interventions	Receptive group music therapy	Receptive group music therapy (music listening, other music activities: dancing, discussion emphasising the emotional aspects of the music while listening to it),	Standard care	Clinical - inpatient	inpatient	Group (>2 people)	face-to-face	not clear	not described	Segregated (only for ppl with disability)	yes	no	no	no	no	5 X week (30 sessions)	1 hr per session		nr	nr	nr	nr	nr	n/a	n/a	n/a	n/a	1. Mental state, general: Brief Psychiatric Rating Scale (BPRS; Overall 1988). 2. Mental state, depression: Self-Rating Depression Scale (SDS); 3. Hamilton Depression Scale (Ham-D; Hamilton 1960). 4. Unable to use - unpublished scale: Inpatient Recovery Effect Scale.
14	He 2005	Geretsegger 2017	RCT/quasi-RCT	Social	Capacity	nr	nr	nr	nr	60	30	30	nr	nr	PD	schizophrenia type II	85	m=35	nr	music	Music interventions	Receptive and 'participative' group music therapy	Receptive and 'participative' group music therapy (music listening, or music listening in combination with reading poems or dancing, music was chosen by the participants after an "induction" given by the therapist),	Standard care	Clinical - inpatient	inpatient	Group (>2 people)	face-to-face	Clinician	therapist	Segregated (only for ppl with disability)	yes	no	no	no	no	5 X week for 30 sessions	1 hr per session		nr	nr	nr	nr	nr	n/a	n/a	n/a	n/a	Mental state, negative symptoms: Scale for the Assessment of Negative Symptoms (SANS; Andreasen 1982).
14	Silverman 2014	Ma 2020	RCT/quasi-RCT	Social	Participation	adults with varied Axis I diagnoses	nr	nr	nr	96	nr	nr	nr	nr	PD	Axis I diagnoses	nr	nr	USA	music	psychoeducation through music therapy	psychoeducation through music therapy	Condition A: live music, a scripted educational lyric analysis session using song lyrics that focused on social support Condition B: recorded music, a scripted educational lyric analysis session about lyrics that focused on social support	Condition C: Without music, a scripted educational session without music concerning support and coping Condition D: investigator led the group in playing rock and roll bingo, no scripted educational session	Clinical - in/outpatient not clear	Acute care psychiatric unit, a University hospital, the Midwestern region, US	Group (>2 people)	face-to-face	Clinician	A certified music therapist with more than 12 years of clinical psychiatric experience conducted therapy sessions	Segregated (only for ppl with disability)	yes	no	no	no	no	24 weekly sessions	45 minutes per session	see description	nr	audio players	nr	music therapist	nr	n/a	n/a	Subjective social isolation outcome: the MSPSS	* No significant between-group difference in total perceived social support for condition A vs. B, condition A and B vs. condition C, as well as for condition A and B vs. D (all p > 0.05) (F (3.87) = 1.50, p = 0.22) * Partial effect size = 0.028 for support from significant other, 0.015 for support from family, 0.094 for support from friends, and 0.049 for total support * Only a significant betwe…	n/a
14	Li 2007a	Geretsegger 2017	RCT/quasi-RCT	Social	Capacity	nr	nr	nr	nr	60	30	30	nr	nr	PD	schizophrenia	100	m=32	nr	music	Music interventions	Receptive group music therapy	Receptive group music therapy (music listening, music listening in combination with verbal inductions given by the therapist, 'positive hypnosis'/positive imagery)	Standard care	Clinical - inpatient	inpatient	Group (>2 people)	face-to-face	Clinician	therapist	Segregated (only for ppl with disability)	yes	no	no	no	no	5 X week for 30 sessions	40 minutes per session		nr	nr	nr	nr	nr	n/a	n/a	n/a	n/a	1. Mental state, depression: Self-Rating Depression Scale (SDS; Zhang 2003). 2. Mental state, anxiety: Self-Rating Anxiety Scale (SAS; Zhang 2003). 3. Behaviour: Nurses' Observation Scale for Inpatient Evaluation (NOSIE; Honigfeld 1965).
14	Fu 2013	Geretsegger 2017	RCT/quasi-RCT	Social	Capacity	nr	nr	nr	nr	40	20	20	nr	nr	PD	schizophrenia	45	m=38.3	nr	music	Music interventions	Instrumental improvisational music therapy	Instrumental improvisational music therapy	Standard care	Clinical - inpatient	inpatient	Not clear	face-to-face	not clear	not described	Segregated (only for ppl with disability)	not clear	no	no	no	no	3 X week for 4 weeks (12 sessions)	45 minutes per session		nr	nr	nr	nr	nr	n/a	n/a	Social functioning: Social Disability Screening Schedule (SDSS; Wu 1998).	Std Mean Diff: -1.25[-1.94,-0.57] (short-term)	Behaviour: Nurses' Observation Scale for Inpatient Evaluation (NOSIE; Honigfeld 1965).
14	Talwar 2006	Geretsegger 2017	RCT/quasi-RCT	Social	Capacity	nr	nr	nr	nr	81	33	48	nr	nr	PD	schizophrenia or related psychoses	74.0741	m=37, 18-64 years	nr	music	Music interventions	Active individual music therapy	Active individual music therapy (improvisation, songs, dialogue),	Standard care	Clinical - inpatient	inpatient	Individual	face-to-face	not clear	not described	Segregated (only for ppl with disability)	not clear	no	no	no	no	weekly for 12 weeks	50 minutes per session		nr	nr	nr	nr	nr	n/a	n/a	n/a	n/a	1. Mental state, general/psychotic symptoms: The Positive and Negative Syndrome Scale (PANSS; Kay 1987). 2. General functioning: General Assessment of Function (GAF; Spitzer 2000). 3. Patient satisfaction: Client Satisfaction Questionnaire (CSQ; Atkinson 1994).
14	Mohammadi 2012	Geretsegger 2017	RCT/quasi-RCT	Social	Capacity	nr	nr	nr	nr	96	35	27 (passive music therapy), 34 (medications only)	nr	nr	PD	schizophrenia	63.5417	m=34.6	nr	music	Music interventions	Active music therapy	Active music therapy plus medication: playing music instruments, singing, body movements with music rhythms	CG1: Passive music therapy + standard care; CG2: medication only	Clinical - inpatient	inpatient	Not clear	face-to-face	not clear	not described	Segregated (only for ppl with disability)	not clear	no	no	no	no	3 X week for 4 weeks	nr		nr	nr	nr	nr	nr	n/a	n/a	n/a	n/a	1. Mental state, negative symptoms: Scale for the Assessment of Negative Symptoms (SANS; Andreasen 1982). 2. Mental state, positive symptoms: Scale for the Assessment of Positive Symptoms (SAPS; Andreasen 1984).
14	Gold 2013	Geretsegger 2017	RCT/quasi-RCT	Social	Capacity	nr	nr	nr	nr	144	72	72	nr	nr	PD	psychotic disorders, mood (affective disorders), neurotic, stress-related and somatoform disorders, personality disorders, substance-related mental disorders, behavioural syndromes associated with physiological disturbances	63.9344	18-57 years	nr	music	Music interventions	Individual music therapy sessions	Individual music therapy sessions that followed a flexible therapy manual with 21 principles of resource-oriented therapy, with general therapeutic attitudes and behaviours (e.g. focusing on the client’s strengths and potentials) as well as specific attitudes within the musical interaction (e.g. tuning into the client’s musical expression). Sessions included ‘engaging the client in music interpla…	TAU	Clinical - in/outpatient not clear	in and outpatient	Individual	face-to-face	not clear	not described	Segregated (only for ppl with disability)	no	no	no	no	no	2 X week for 3 months	45 minutes per session		nr	nr	nr	nr	nr	n/a	n/a	n/a	n/a	1. General functioning: General Assessment of Function (GAF; Spitzer 2000). 2. Mental state, negative symptoms: Scale for the Assessment of Negative Symptoms (SANS; Andreasen 1982).
14	Ulrich 2007	Geretsegger 2017	RCT/quasi-RCT	Social	Capacity	nr	nr	nr	nr	37	21	16	nr	nr	PD	schizophrenia or related psychoses	54.0541	m=38	nr	music	Music interventions	Active group music therapy	Active group music therapy (focusing on musical processes and discussion of patients' problems)	Standard care	Clinical - inpatient	inpatient	Group (>2 people)	face-to-face	not clear	not described	Segregated (only for ppl with disability)	yes	no	no	no	no	average of 7.5 sessions,	60-105 minutes per session		nr	nr	nr	nr	nr	n/a	n/a	n/a	n/a	1. Mental state, negative symptoms: Scale for the Assessment of Negative Symptoms (SANS; Andreasen 1982). 2. Quality of life, mental health: Skalen zur psychischen Gesundheit [scales about mental health] (SPG; Tönnies 1996).
14	Lu 2013	Geretsegger 2017	RCT/quasi-RCT	Social	Capacity	nr	nr	nr	nr	80	38	42	nr	nr	PD	schizophrenia	73.75	m=24.9	nr	music	Music interventions	Group music therapy	Group music therapy (music listening, singing popular Taiwanese songs, playing percussion instruments, watching music videos, and discussions),	Standard care	Clinical - inpatient	inpatient	Group (>2 people)	face-to-face	Researcher	research assistant trained in music therapy in group settings	Segregated (only for ppl with disability)	yes	no	no	no	no	2 X week for 5 weeks	1 hr per session		nr	nr	training in music therapy in group settings	nr	nr	n/a	n/a	n/a	n/a	Mental state, general/psychotic symptoms: The Positive and Negative Syndrome Scale (PANSS; Kay 1987). Mental state, depression: Calgary Depression Scale for Schizophrenia (CDSS; Addington 1992).
14	Chang 2013	Geretsegger 2017	RCT/quasi-RCT	Social	Capacity	nr	nr	nr	nr	72	36	36	? M25	? M 24	PD	schizophrenia	68.0556	m=34.4	nr	music	Music interventions	Receptive and active group music therapy	Receptive and active group music therapy (singing, music relaxation, music reminiscence, musical story, music discussion, song creation, playing instruments; all activities were led by a music therapist).	Standard care	Clinical - inpatient	inpatient	Group (>2 people)	face-to-face	Clinician	music therapist	Segregated (only for ppl with disability)	yes	no	no	no	no	5 X week for 8 weeks (40 sessions)	1 hr per session		nr	nr	nr	nr	nr	n/a	n/a	Quality of life, perceived social support: Social Support Questionnaire	Std Mean Diff: 0.73[0.26,1.21] (short term)	1. Quality of life, general/subjective well-being: General Well-Being Schedule (GWB; Fazio 1977).
14	Mao 2013	Geretsegger 2017	RCT/quasi-RCT	Social	Capacity	nr	nr	nr	nr	90	45	45	nr	nr	PD	schizophrenia	48.8889	m=35.2	nr	music	Music interventions	group active and receptive music activities	group active and receptive music activities led by a music teacher and a psychotherapist (music theory class, music singing, instrument playing, music listening and appreciation) - in addition to regular medical treatment	Standard care	Clinical - inpatient	inpatient	Group (>2 people)	face-to-face	Clinician	"music teacher and psychotherapist"	Segregated (only for ppl with disability)	yes	no	no	no	no	2 X day (morning and afternoon), 5 X week for 6 months	45 minutes per session		nr	nr	nr	nr	nr	n/a	n/a	1. Social functioning: Activities of daily living (ADL). Social functioning: Social Disability Screening Schedule (SDSS; Wu 1998)	1. Std Mean Diff: -1.2[-1.65,-0.75] (medium term) 1. Std Mean Diff: -1.8[-2.29,-1.3] (long term) 2. Std Mean Diff: -0.67[-1.1,-0.25] (medium term) 2. Std Mean Diff: -0.56[-0.98,-0.14] (long term)	Mental state, general/psychotic symptoms: The Positive and Negative Syndrome Scale (PANSS; Kay 1987).
14	Tang 1994	Geretsegger 2017	RCT/quasi-RCT	Social	Capacity	nr	nr	nr	nr	76	38	38	nr	nr	PD	residual schizophrenia	nr	nr	nr	music	Music interventions	Active and receptive group music therapy	Active and receptive large-group music therapy (music listening, singing and playing on instruments, discussion)	Standard care	Clinical - inpatient	inpatient	Group (>2 people)	face-to-face	not clear	not described	Segregated (only for ppl with disability)	yes	no	no	no	no	5 X week (average 19 sessions)	1 hr per session		nr	nr	nr	nr	nr	n/a	n/a	n/a	n/a	Mental state, negative symptoms: Scale for the Assessment of Negative Symptoms (SANS; Andreasen 1982). Unable to use - insufficient data: Disability Assessment Schedule (DAS).
14	Wang 2013	Geretsegger 2017	RCT/quasi-RCT	Social	Capacity	nr	nr	nr	nr	62	31	31	nr	nr	PD	chronic schizophrenia	62.9032	m=36.7	nr	music	Music interventions	Group and individual music therapy	Group and individual music therapy, including active and receptive methods, improvisation, musical appreciation, song singing, and rhythm training in addition to standard care.	Standard care	Clinical - inpatient	inpatient	Individual and group	face-to-face	not clear	not described	Segregated (only for ppl with disability)	yes	no	no	no	no	3 X week for 3 m (36 sessions)	nr		nr	nr	nr	nr	nr	n/a	n/a	n/a	n/a	Behaviour: Nurses' Observation Scale for Inpatient Evaluation (NOSIE; Honigfeld 1965).
14	Yang 1998	Geretsegger 2017	RCT/quasi-RCT	Social	Capacity	nr	nr	nr	nr	72	41	31	nr	nr	PD	schizophrenia	58.5714	21-55 years	nr	music	Music interventions	Active and receptive individual and group music therapy	Active and receptive individual and group music therapy (music listening, improvisation, discussion),	Standard care	Clinical - inpatient	inpatient	Group (>2 people)	face-to-face	not clear	not described	Segregated (only for ppl with disability)	yes	no	no	no	no	6 X week	2 hr per session		nr	nr	nr	nr	nr	n/a	n/a	Social functioning: Social Disability Schedule for Inpatients (SDSI; Wu 1998).	Std Mean Diff: -0.78[-1.27,-0.28] (medium term)	1. Global state: No clinically important improvement (as rated by trialists). 2. Mental state, general: Brief Psychiatric Rating Scale (BPRS; Overall 1988). 3. Mental state, negative symptoms: Scale for the Assessment of Negative Symptoms (SANS; Andreasen 1982). Unable to use - insufficient data: Present State Examination Change Rating Scale (PSE).
15	Hildebrandt 2016	Takahashi 2019	RCT/quasi-RCT	Social	Capacity and participation	nr	nr	nr	nr	78	nr	nr	nr	nr	ASD	ASD w/ ID (IQ<70)	nr	14-53 years, m=22.5	nr	dance	Dance-based therapy for social skills and imitation	"We Dance and Find Each Other”	(1) Warm-up, (2) Mirroring (Included Dyadic and entire group in improvised movements with participants’ music (3) Cool down and verbal reflection	not described	not reported	not clearly defined, but states as a therapy so assuming in a clinical setting	Group (>2 people)	face-to-face	not clear	not reported	Segregated (only for ppl with disability)	yes	no	no	no	no	weekly for 10 weeks	1 hr per session	see description	nr	nr	nr	nr	nr	n/a	n/a	n/a	n/a	scale for the assessment of negative symptoms
15	Koch 2015	Pallathra 2019, Takahashi 2019, Lorenc 2018	NRCT	Social	Capacity and participation	nr	nr	nr	nr	31	16	15	nr	nr	ASD	ASD without ID	74	m=22	Germany	dance	Dance-based therapy for social skills and imitation	Dance Movement Therapy	dance movement therapy including dyadic mirroring, expressive movement and verbal discussion. Targeted the improvement of attunement.	no intervention	Clinical - in/outpatient not clear	not clearly defined, but states as a therapy so assuming in a clinical setting	Group (>2 people)	face-to-face	not clear	not reported	Segregated (only for ppl with disability)	yes	no	no	no	no	weekly for 7 weeks	1 hr per session	see description	nr	nr	nr	nr	nr	1. social skills domain of Questionnaire of movement Therapy 2. self-other awareness scale	1. Hedges G = 0.35 (-0.36, 1.06)* 2. Hedges G = 0.44 (-0.27, 1.16)* "significant improvement in ... social skills"	n/a	n/a	1. Heidelberger State Inventory 2. Body awareness domain of Questionnaire of movement Therapy
15	Koehne 2016	Pallathra 2019, Takahashi 2019, Lorenc 2018	NRCT	Social	Capacity and participation	nr	nr	nr	nr	51	27	24	nr	nr	ASD	ASD without ID	63	m=33	Germany	dance	Dance-based therapy for social skills and imitation	Imitation and Synchronization Based Dance/Movement	Dance therapy focused in imitation, synchronisation and interaction. Addressed emotion recognition/ inference as their primary treatment target.	control movement intervention (CMI): movement training focused on dexterity, balance and endurance	Clinical - in/outpatient not clear	not clearly defined, but states as a therapy so assuming in a clinical setting	Group (>2 people)	face-to-face	not clear	not reported	Segregated (only for ppl with disability)	yes	no	no	no	no	10 sessions	1.5 hr per session	see description	nr	nr	nr	nr	nr	1. Emotional Empathy Scale 2. multifaceted Empathy Test (empathic feelings) 3. IRI - perspective taking 4. IRI - empathic concern	1. Hedges G = 0.29 (-0.42, 0.99) 2. Hedges G = 0.03 (-0.52, 0.58) 3. Hedges G = 0.05 (-0.50, 0.60) 4. Hedges G = -0.05 (-0.60, 0.50)	n/a	n/a	n/a
15	Mastrominico 2018	Takahashi 2019	RCT/quasi-RCT	Social	Capacity and participation	nr	nr	nr	nr	57	?57 (reports T57, but no Cno)	nr	nr	nr	ASD	ASD w/ ID (IQ<70)	78.6	14-52, m=22.5	nr	dance	Dance-based therapy for social skills and imitation	Dance Movement Therapy	(1) Warm-up, (2) Dyadic movement (mirroring with music) (3) Baum circle (4) Verbal processing	not described	not reported	not clearly defined, but states as a therapy so assuming in a clinical setting	Group (>2 people)	face-to-face	not clear	not reported	Segregated (only for ppl with disability)	yes	no	no	no	no	weekly for 10 weeks	1 hr per session	see description	nr	nr	nr	nr	nr	1. Cognitive and Emotional Empathy Questionnaire 2. Interpersonal Reactivity Index 3. Saarbrücker Persönlichkeitsfragebogen zur Messung von Empathie	no significant changes	n/a	n/a	n/a
15	Mateos-Moreno 2013	Hallett 2019	NRCT	Social	Capacity	nr	nr	nr	nr	16	8	8	nr	nr	ASD	"severe autism"	nr	nr	nr	dance	Dance-based therapy for social skills and imitation	Dance-based therapy for social skills and imitation	dance/ movement and music therapy	not described	not reported	not described	Not clear	face-to-face	not clear	not reported	Segregated (only for ppl with disability)	not clear	no	no	no	no	nr	nr		nr	nr	nr	nr	nr	communication	Improvements in interaction, imitation, emotion, instinct, and regulation. No significant findings for attention, perception, association, intention, muscle tone, motility, contact, or communication regulation.	n/a	n/a	n/a
15	Sandel 1982	Soundy 2014	Qualitative: other	Community	Capacity and participation	nr	nr	nr	nr	3	3	0	nr	n/a	PD	Schizophrenia	nr	nr	nr	dance	Physical activity participation	Dance-movement therapy	role and value of dance-movement therapy for individuals with schizophrenia	no CG	Clinical - inpatient	psychiatric inpatient unit	Not applicable	not clear	not clear	not really relevant	Both integrated and segregated	not clear	not clear	not clear	not clear	not clear	n/a	n/a		nr	nr	nr	nr	nr	see themes summary	see themes summary		* ndividuals felt valued by others for having specific roles and responsibility within the sessions * Emotional support provided patients with empathy	see themes summary
16	Stickley 2012	Bigby 2018	Qualitative: other	Community	Participation	nr	nr	nr	nr	50 participants over 2 years	6 w ID 3 artists/facilitators 4 DSWs 20 family/friends	0	0	n/a	ID	severity not reported	nr	nr	nr	drama	Segregated arts activity. Support to develop talents, as catalyst for interaction with other artists and public;	Segregated arts activity	Drama and music group. Segregated, boundary crossing initiatives through performances and visits from mainstream students Convivial encounters with people without disability—regular in group context and intermittent with associated others without disability The location of the programme described by Stickley et al. (2012) in a disused cinema gave scope for interaction with students from the local…	no CG	Disability activity setting (e.g., day centre)	day program	Individual and group	face-to-face	Staff	not described, but assume day centre staff?	Segregated (only for ppl with disability)	yes	yes	no	no	no	nr	nr		nr	art supplies?	nr	nr	nr	n/a	n/a	relationships/community participation	* development of relationships with other participants, * Increased interactions with community members, e.g., with local college students who filmed the group	confidence and self-esteem
16	Hackett 2014	Bourne 2018	Mixed methods	Social	Capacity and participation	nr	nr	nr	nr	12	12	0	nr	n/a	ID & PD	LD and MH diagnoses	male & female (%nr)	nr	UK	drama	drama therapy in inpatient, outpatient, community and residential settings	Dramatherapy group	Dramatherapy group, storymaking. Mutual & peer support model.	no CG	Community	NHS community setting	Group (>2 people)	face-to-face	not clear	not clearly described	Segregated (only for ppl with disability)	yes	no	no	no	no	nr	nr	see description	nr	nr	nr	nr	nr	n/a	n/a	1. leisure activities 2. peer support 3. Friendship building	1. improved 2. Services users went on to develop their own peer support group. 3. improved	1. quality of life 2. feelings of worth
16	Folostina 2015	Bourne 2018	Qualitative: other	Social	Capacity and participation	nr	nr	nr	nr	9	9	0	nr	n/a	ID & PD	LD and MH diagnoses	55.5556	nr	Romania	drama	drama therapy in inpatient, outpatient, community and residential settings	Dramatherapy group	Dramatherapy group using story-telling	no CG	Residential/home	residential	Group (>2 people)	face-to-face	not clear	not clearly described	Segregated (only for ppl with disability)	yes	no	no	no	no	4 months, frequency nr	nr	see description	nr	nr	nr	nr	nr	1. Communication & social skills (e.g., such as team building & insight) 2. maladaptive behaviours & ability to deal better with rules & control impulses.	1. increase 2. decrease CB & increased impusle control	n/a	n/a	low mood
16	Gardner-Hynd 2010	Bourne 2018	Qualitative: other	Social	Capacity and participation	nr	nr	nr	nr	4	4	0	nr	n/a	ID & PD	LD and MH diagnoses	100	nr	UK	drama	drama therapy in inpatient, outpatient, community and residential settings	Dramatherapy group	Dramatherapy group using story-making	no CG	Clinical - inpatient	NHS inpatient	Group (>2 people)	face-to-face	not clear	not clearly described	Segregated (only for ppl with disability)	yes	no	no	no	no	nr	nr	see description	nr	nr	nr	nr	nr	social skills/interactions	Positive reflections; Confidence building and improved social interaction. Staff noticed clients engaged better	Building relationships	positive effect	n/a
16	Grainger 1992 - note error in SR referencing	Bourne 2018	Mixed methods	Social	Capacity and participation	nr	nr	nr	nr	12	12	0	nr	n/a	PD	Thought diagnoses & schizophrenia	n/a	nr	UK	drama	drama therapy in inpatient, outpatient, community and residential settings	Dramatherapy group	Dramatherapy group with a focus was on self-awareness & insight into self & others	no CG	Clinical - outpatient	NHS day services	Group (>2 people)	face-to-face	not clear	not clearly described	Segregated (only for ppl with disability)	yes	no	no	no	no	10 sessions	nr	see description	nr	nr	nr	nr	nr	engagement with others (assume they mean capacity/skills, not frequency/number of engagements?)	Post group there was an improvement in control of private world and engagement with others. People were more efficient in understanding what was happening to them Change in self-awareness & awareness of others	building relationships	started to build relationships with others, feeling able to trust enough to share their worlds.	n/a
16	Jaaniste 2008	Bourne 2018	Qualitative: other	Social	Capacity and participation	nr	nr	nr	nr	5	5	0	nr	n/a	PD	dual diagnosis: MH & substance use	100	nr	Australia	drama	drama therapy in inpatient, outpatient, community and residential settings	Dramatherapy group	Dramatherapy group-work & ARTA, which is a Dutch model of recovering from substance misuse	no CG	not reported	nr	Group (>2 people)	face-to-face	not clear	not clearly described	Segregated (only for ppl with disability)	yes	no	no	no	no	11 sessions	nr	see description	nr	nr	nr	nr	nr	Communication	improved	1. Friendships 2. isolation	1. friendship building & the sharing of loss and pain. 2. Development of mutual support helped with social isolation.	1. substance use 2. overall benefits/experience 3. Self-esteem
16	Jacques 2011	Bourne 2018	Qualitative: interviews	Social	Capacity and participation	nr	nr	nr	nr	45 clients, 19 staff	45	0	nr	n/a	PD	various MH diagnoses	n/a	nr	UK	drama	drama therapy in inpatient, outpatient, community and residential settings	Dramatherapy group	Dramatherapy group. A production was created and developed with evaluations over a five-month period.	no CG	Clinical - outpatient	NHS day services	Group (>2 people)	face-to-face	not clear	not clearly described	Segregated (only for ppl with disability)	yes	no	no	no	no	5 months, frequency nr	nr	see description	nr	nr	nr	nr	nr	n/a	n/a	1. feelings of mutual support 2. feeling accepted/included	1. Mutual support stimulated participation and shared ideas. 2. Being creative together gave a place to feel included and accepted	1. creativity 2. overall experience
16	Lahad 1999	Bourne 2018	Case study (not multiple baseline)	Social	Capacity and participation	nr	nr	nr	nr	7 groups, N=nr	nr	0	nr	n/a	PD	PTSD from rocket shelling	nr	nr	Israel	drama	drama therapy in inpatient, outpatient, community and residential settings	Dramatherapy group	Dramatherapy group crisis intervention using storymaking.	no CG	Community	community setting	Group (>2 people)	face-to-face	not clear	not clearly described	Segregated (only for ppl with disability)	yes	no	no	no	no	5 weeks, frequency nr	nr	see description	nr	nr	nr	nr	nr	n/a	n/a	Friendships	Friendship building through support and experience	reslience
16	McAlister 2011	Bourne 2018	Case study (not multiple baseline)	Social	Capacity and participation	nr	nr	nr	nr	5	5	0	nr	n/a	PD	Schizophrenia & offending	100	nr	UK	drama	drama therapy in inpatient, outpatient, community and residential settings	Dramatherapy group	Dramatherapy group, recreating positive interactions using improvisation.	no CG	Clinical - inpatient	NHS medium secure hospital (probably in-patient?)	Group (>2 people)	face-to-face	not clear	not clearly described	Segregated (only for ppl with disability)	yes	no	no	no	no	nr	nr	see description	nr	nr	nr	nr	nr	n/a	n/a	n/a	n/a	1. overall experience 2. self-reflection/awareness
16	Orkibi 2014	Bourne 2018	Mixed methods	Social	Capacity and participation	nr	nr	nr	nr	5	5	0	nr	n/a	PD	various MH disorders	n/a	nr	Israel	drama	drama therapy in inpatient, outpatient, community and residential settings	Dramatherapy group	Dramatherapy group-work to reduce stigma and facilitate social interactions between people with mental illness and those without mental illness	no CG	Community	centre for creative arts therapies	Group (>2 people)	face-to-face	not clear	not clearly described	Integrated (>=1 ppl without disability)	yes	no	no	no	no	weekly for 20 weeks	2 hr	see description	nr	nr	nr	nr	nr	1. Communication 2. awareness of self/others	1. The group improved communication 2. Increased awareness of self and others	Friendship building	There was emotional and perceptual change, togetherness & friendship building.	1. Rosenberg Self-esteem Scale 2. the Perceived Devaluation & Discrimination Scale. 3. The internalised Stigma of Mental Illness Scale
16	Ramsden 2010	Bourne 2018	Qualitative: other	Social	Capacity and participation	nr	nr	nr	nr	6	6	0	nr	n/a	PD	MH disorders and offending	100	nr	UK	drama	drama therapy in inpatient, outpatient, community and residential settings	Dramatherapy group	Intense drama- therapy group focused on offenders’ inability to feel remorse	no CG	Clinical - inpatient	NHS high secure hospital (probably in-patient?)	Group (>2 people)	face-to-face	not clear	not clearly described	Segregated (only for ppl with disability)	yes	no	no	no	no	4 days	nr	see description	nr	nr	nr	nr	nr	empathy	role-play gave clients a chance to feel empathy for their victims. Life-drama scenarios allowed the participants to process what it might be like from an others’ position	Bonding/insight	Group bonding, new insight & remorse were built	overall experience
16	Holloway 2011	Bourne 2018	Qualitative: interviews	Social	Capacity and participation	nr	nr	nr	nr	68	68	0	nr	n/a	PD	suicide survivors & MH diagnoses	nr	nr	UK	drama	drama therapy in inpatient, outpatient, community and residential settings	Dramatherapy group	Dramatherapy group, recreating positive relationships with others and self	no CG	Clinical - outpatient	NHS outpatient	Group (>2 people)	face-to-face	not clear	not clearly described	Segregated (only for ppl with disability)	yes	no	no	no	no	6 months, fequency nr	nr	see description	nr	nr	nr	nr	nr	n/a	n/a	Friendships	Building friendships with others who understand.	mental health/emotional state
16	Dent-Brown 2006	Bourne 2018	Mixed methods	Social	Capacity and participation	nr	nr	nr	nr	25 patients, 24 clinicians	25	0	nr	n/a	PD	BPD	nr	nr	UK	drama	drama therapy in inpatient, outpatient, community and residential settings	Dramatherapy group	Dramatherapy group used to develop stories	no CG	Community	community setting	Group (>2 people)	face-to-face	not clear	not clearly described	Segregated (only for ppl with disability)	yes	no	no	no	no	nr	nr	see description	nr	nr	nr	nr	nr	ability to identify self	Able to identify with self through individual stories. Patients with BPD were less likely to identify closely with stories than other patients and clinicians. Themes: Stories used as metaphors for real life situations. Positive changes can happen, and a new perception of the self is revealed. People can feel exposed.	n/a	n/a	n/a
17	Darragh 2016	Bigby 2018	Qualitative: interviews	Community	Participation	nr	nr	nr	nr	5	5	0	0	n/a	ID	severity not reported	nr	21-27 years	Australia	art	Segregated arts activity. Support to develop talents, as catalyst for interaction with other artists and public;	Segregated arts activity	Support to develop talents, as catalyst for interaction with other artists and public; Segregated but boundary crossing initiatives through exhibitions, performances and sales. Convivial encounters with people with disability—regular in group context and intermittent with associated others without disability. A central strategy was the creation of a segregated group that enabled participants to d…	no CG	Disability activity setting (e.g., day centre)	Tutti Arts day program	Group (>2 people)	face-to-face	Staff	not described, but assume day centre staff?	Segregated (only for ppl with disability)	yes	yes	no	no	no	nr	nr		nr	art supplies?	nr	nr	nr	n/a	n/a	Participation/friendships	Enjoyed activities, public approbation for their work, had developed friendships with others at the group which meant participation had expanded individual social networks	happiness and confidence
17	Allan 2015	Finkel 2020	Mixed methods	Social and community	Capacity and participation	people in transition from acute to community MH care	nr	nr	nr	13	13	0	nr	n/a	PD	Acute mental illness	nr	22-65 years	UK	art	open studio art programs/therapy	open studio art programs/therapy	open studio operates on the principles of the recovery approach. Sessions are moderated by two facilitators, and meetings include an introduction, artmaking and time for sharing. During the group sessions, facilitators circulate among participants and ask them about their daily lives.	no CG	Community	art organization in the city center. Affiliated to NHS in Britain.	Group (>2 people)	face-to-face	not clear	"facilitator"	Segregated (only for ppl with disability)	yes	no	no	no	no	1 X week for 8–13 months	2hrs per meeting		nr	art supplies?	nr	"facilitator"	nr	n/a	n/a	Social inclusion measure: Qualitative data was gathered by means of a semi-structured interview with each participant at the end of the program.	Participants reported that the group contributed significantly to their quality of life.	The Clinical Outcomes in Routine Evaluation screening measure (CORE-10) Warwick-Edinburgh Mental Well-Being Scale (WEMWBS)
17	Chiu 2015	Finkel 2020	Mixed methods	Social and community	Capacity and participation	nr	nr	nr	nr	36	36	0	nr	n/a	PD	acute psychiatric state	nr	23-79 years	Canada	art	open studio art programs/therapy	open studio art programs/therapy	Facilitated by an art therapist and a student. The study was conducted over a period of half a year. The group was open to anyone including staff and interns and there was no need for a referral. It offers a creative experience in a community atmosphere; the door is open, and you can join or leave freely.	no CG	Clinical - in/outpatient not clear	situated in the psychiatric department of Toronto General Hospital	Group (>2 people)	face-to-face	Clinician	art therapist and a student	Segregated (only for ppl with disability)	yes	no	no	no	no	1 X week	2hrs per session		nr	art supplies?	nr	art therapist and a student	nr	communication	the group allowed them to express experiences that they were unable to express in word	1. art group participation 2. sense of community belonging	1. 81% of participants reported they would be interested in participating in a similar community group, once they are released from hospital. 2. increase belonging	A POMS-B questionnaire was filled out by participants before and after the group sessions. A true-false questionnaire was administered to the clients at the end of the therapeutic session in order to collect data about their open studio experience. In addition, the study includes two vignettes.
17	Bungay 2010	Roche 2019	Systematic review	Community	Participation	adults w MH problems	nr	Medline & Cinahl ‘”Grey literature” only	nr	nr	nr	nr	nr	nr	PD	adults w MH problems	nr	nr	UK	art	referrals to non-medical community and voluntary resource sectors, including arts, music, dancing, and movement interventions	Arts on prescription projects	Improving MH outcomes through referral to non-medical community and voluntary sector resources. 12 Arts on prescription projects from across the UK, including visual arts, music and singing and dance and movement interventions. Community programming for the arts interventions are a way to engage community members and promote social capital	nr	Community	"community programming for the arts"	Individual and group	face-to-face	not clear	not described	Both integrated and segregated	yes	yes	no	no	no	n/a	n/a	see description	nr	nr	nr	nr	nr	n/a	n/a	social engagement	Promotes group social engagement	health and well-being
17	Hacking 2008	Webber 2017, Newlin 2015 (not extracted)	NRCT-No control	Community	Participation	nr	nr	nr	nr	nr	nr	nr	nr	nr	PD	mental health problems	nr	nr	nr	art	Participatory arts and MH projects	Participatory arts and MH projects	Participation in a variety of different arts projects in community settings such as ‘arts on prescription’ courses, workshops, studios or courses for people with mental health problems	no CG	not reported	not clear if community or therapeutic setting	Not clear	face-to-face	not clear	not reported	Integrated (>=1 ppl without disability)	not clear	not clear	not clear	not clear	not clear	nr	nr	see description	nr	nr	nr	nr	nr	n/a	n/a	social inclusion	Improvement in social inclusion scores at follow-up (including social isolation, social relations and social acceptance).	n/a
17	Stokrocki 2004	Finkel 2020	Qualitative: other	Social and community	Capacity and participation	nr	nr	nr	nr	3	3	0	nr	n/a	PD	homeless & DV	0	nr	USA	art	open studio art programs/therapy	open studio art programs/therapy	Open studio for homeless women established in the researcher’s home as part of a research project.	no CG	Residential/home	in the researcher's home	Group (>2 people)	face-to-face	not clear	not described - probably arts therapist?	Segregated (only for ppl with disability)	yes	no	no	no	no	nr	nr		nr	art supplies?	nr	probably arts therapist?	nr	n/a	n/a	social connection	artmaking in the open studio provides important social connections, meaning and strengthens self-esteem.	n/a
17	Howells 2009	Finkel 2020	Qualitative: interviews	Social and community	Capacity and participation	nr	nr	nr	nr	20	20	0	nr	n/a	PD	50% had psychiatric disorders	nr	24-75 years	USA	art	open studio art programs/therapy	open studio art programs/therapy	Community-based open studio operating in a psychiatric rehabilitation center. The open studio operated in the city center in a building that was not affiliated with the rehabilitation center. The studio holds art classes and includes a gallery and workspace. Open to all community members. The research was conducted over the course of 1 year.	no CG	Community	Community-based open studio operating in a psychiatric rehabilitation center.	Group (>2 people)	face-to-face	not clear	not described - probably staff/rehab clinician	Integrated (>=1 ppl without disability)	yes	yes	no	no	no	nr, project conducted for 1 year	nr		nr	art supplies?	nr	probably community centre staff/rehab clinicians	nr	n/a	n/a	overall experience/observations	art making allowed the participants to assume new identities and roles. A community of artists was created, and art was perceived as a bridge to the community-at-large. Participants reported that the outcome, and not only the process, was important.	n/a
17	Thompson 2016	Finkel 2020	Qualitative: interviews	Social and community	Capacity and participation	nr	nr	nr	nr	10	10	0	nr	n/a	PD	severe mental illness	nr	nr	USA	art	open studio art programs/therapy	open studio art programs/therapy	weekly meetings and presentation of work in a gallery at the Community Mental Health Center. Participants were patients that were in transition from hospitalization to community mental health care.	no CG	Community	exhibition in a gallery at the Community Mental Health Center	Group (>2 people)	face-to-face	not clear	not described - probably staff	Segregated (only for ppl with disability)	yes	no	no	no	no	12 meetings over 6 weeks	nr		nr	art supplies?	nr	community centre staff	nr	n/a	n/a	n/a	n/a	1. Psychiatric Symptoms 2. identity/sense of self
17	Griffith 2015	Finkel 2020	Mixed methods	Social and community	Capacity and participation	nr	nr	nr	nr	78	78	0	nr	n/a	PD	homeless adults	nr	nr	USA	art	open studio art programs/therapy	open studio art programs/therapy	open studio in a community center that serves the homeless, combined with a gallery that sells artwork. Open every day. The research was conducted over a period of 1 year.	no CG	Community	Community centre for the homeless	Group (>2 people)	face-to-face	Staff	staff?	Segregated (only for ppl with disability)	yes	no	no	no	no	nr, studio open daily, project conducted for 1 year	not clear		nr	art supplies?	nr	staff?	nr	n/a	n/a	Observations and documentation of changes in six areas according to categories of life achievement (Prescott et al., 2008) combined with vignettes from therapy sessions. Associations between frequency of attendance of group sessions and increase in life achievement were examined; a comparison was made between life achievement of participants who took part in the open studio only and those of part…	* positive correlation between participation in the group and an increase in life achievement such as finding a job, rehabilitation, finding housing, initiative, etc. * participants who took part both in the open studio as well as the gallery for sale of artwork demonstrated a more meaningful increase in life achievements than the participants who only took part in the open studio.	n/a
17	Spandler 2007	Webber 2017, Newlin 2015 (not extracted)	Qualitative: other	Community	Participation	nr	nr	nr	nr	nr	nr	nr	nr	nr	PD	mental health problems	nr	nr	nr	art	Participatory arts and MH projects	Participatory arts and MH projects	Participation in a variety of different arts projects such as ‘arts on prescription’ courses, workshops, studios or courses for people with mental health problems	no CG	not reported	not clear if community or therapeutic setting	Not clear	face-to-face	not clear	not reported	Segregated (only for ppl with disability)	not clear	not clear	not clear	not clear	not clear	nr	nr	see description	nr	nr	nr	nr	nr	n/a	n/a	mutual support	Participants reported increased mutual support in arts groups	n/a
18	Pedersen 2012	Maujean 2015, Kamioka 2014	RCT/quasi-RCT	Social	Quality of Life	adults with depression	nr	nr	nr	29	16	13	0	0	PD	Depression	nr	nr	Norway	animal	Farm animal intervention (cattle, horses, cats, dogs, rabbits)	Farm animal intervention (cattle, horses, cats, dogs, rabbits)	A first introductory visit was used by the participants to get familiar with the farm and farmer. On the following visit, the participants worked together with the farmer in the cow shed. The participants were allowed to choose work such as grooming, mucking, feeding, taking care of thecalves, and milking. They could also choose to spend their time in physical contact with the animals. The partic…	waitlist	Vocational training/work setting	Eleven dairy farms	Not clear	face-to-face	not clear	not described	Not clear	not clear	not clear	not clear	not clear	not clear	2 X week for 12 weeks	1.5-3hrs per session		nr	nr	nr	farms/farmers	nr	n/a	n/a	n/a	n/a	Beck Depression Inventory State-trait anxiety Inventory-State Subscale Generalised Self-Efficacy Scale
18	Berget 2008, 2011	Maujean 2015	RCT/quasi-RCT	Social	Quality of Life	adults with psychiatric disorders	nr	nr	nr	90	60	30	nr	nr	PD	Psychiatric disorders	nr	nr	nr	animal	Farm animal intervention (cows, cattle, sheep, horses)	Farm animal assisted therapy (cows, cattle, sheep, horses)	Visits to a farm to work with the animals. Activities included patting, washing, and grooming the animals, as well as moving them and riding horses	waitlist	Vocational training/work setting	farm	Not clear	face-to-face	not clear	not described	Not clear	not clear	not clear	not clear	not clear	not clear	2 X week for 12 weeks	3 hrs per session		nr	nr	nr	farms/farmers	nr	n/a	n/a	n/a	n/a	Generalised Self-Efficacy Scale Coping Strategies Scale of the Pressure management Inventory Quality of life Scale Spielberger State-trait anxiety Inventory Beck Depression Inventory
18	Gonzalez 2011	Webber 2017, Clatworthy 2013, Newlin 2015 (not extracted)	NRCT-No control	Community	Participation	nr	nr	nr	nr	46	nr	nr	nr	nr	PD	severe depression	22	25-65 years	Norway	community group participation	Horticulture group	Horticulture group	Twice-weekly 3-h sessions involving ‘ordinary and easy gardening’ activities over 12 weeks at an urban farm. Participation was in a group of 3–7 people.	no CG	Community	urban farm	Group (>2 people)	face-to-face	not clear	not reported	Not clear	not clear	yes	not clear	not clear	not clear	twice a week for 12 weeks	3 hrs per session	see description	nr	nr	nr	nr	nr	n/a	n/a	social activity levels	Self-reported social activity levels increased at the end of the intervention (for 38% of participants) and at 3-month follow-up (31%)	1. Depression
18	O'Brien 2011	Webber 2017, Newlin 2015 (not extracted)	Qualitative: other	Community	Participation	nr	nr	nr	nr	nr	nr	nr	nr	nr	PD	severe and enduring mental health problems	nr	nr	nr	community group participation	Ecotherapy volunteering group in public green space	Ecotherapy volunteering group in public green space	Volunteering for 2–3 days per week over a number of months at an urban public green space. Groups of about six worked at the project per day. It is described as ‘contemporary ecotherapy’ which focuses on environmental conservation and improving one’s mental and physical health	no CG	Community	public urban green space	Individual and group	face-to-face	not clear	not reported	Not clear	not clear	yes	not clear	not clear	not clear	2-3 days per week over "a number of months"	nr	see description	nr	nr	nr	nr	nr	n/a	n/a	social connections/relationships	Participants improved relationships within the group and built links with the wider community around the project	n/a
18	Parkinson 2011	Clatworthy 2013	NRCT-No control						240	50	50	0	nr	n/a	PD	"mixed" MH conditions	76	20s-70s	UK	community group participation		Gardening	Variety of gardening based interventions	No CG	Community	community allotments	Group (>2 people)	face-to-face	not clear		Not clear						long-term on-going gardening projects	nr							n/a	n/a	"social factors"	Participants said a wide range of factors supported their motivation to engage in the gardening project, including personal appeal and meaningfulness of the activity and social factors.	n/a
18	Howarth 2018	Picton 2018	Qualitative: focus groups							47	47	0	nr	n/a	PD	nr	nr	35-68 years	UK	community group participation		gardening/green activities	green activities, such as gardening	no CG	Community		Group (>2 people)	face-to-face			Segregated (only for ppl with disability)						nr	nr											themes
18	Harris 2017	Picton 2018	Qualitative: focus groups							15	15	0	nr	n/a	PD	MH service users	nr	nr	UK	community group participation		gardening project		no CG	Community		Group (>2 people)	face-to-face			Segregated (only for ppl with disability)						nr	nr									themes	Four main themes were identified: i) COMMUNITY, ii) agency, iii) mental health, and iv) natural value. The social element of the project was the key facilitator to engagement; the flexible structure of the gardening project was also significant and allowed service users to feel empowered. Nature evoked a sense of calm and provided participants with a non-threatening space that was engaging.
18	Parr 2007	Clatworthy 2013	NRCT-No control							15	15 clients, 17 staff	0	nr	n/a	PD	nr	nr	nr	UK	community group participation		gardening projects	two gardening projects	No CG	Community	community allotments	Group (>2 people)	face-to-face	not clear		Not clear						long-term on-going gardening projects	nr							n/a	n/a	sense of belonging	Benefits including enhanced mood, sense of belonging, meaningful work. One project facilitated greater social inclusion than the other. Paper also highlighted challenges of the projects.	mood
18	Kam 2010	Clatworthy 2013	RCT/quasi-RCT							24	nr	nr	nr	nr	PD	"mixed" MH conditions	71	M=44.3	Hong Kong	community group participation		Horticultural programme	Horticultural programme as part of work skills training	TAU	Vocational training/work setting		Group (>2 people)	face-to-face	Clinician		Segregated (only for ppl with disability)						two weeks	10 hours total							social skills	improved social skills	social benefits	Interviews revealed a range of perceived benefits: development of social network and improved social skills	depression/anxiety wellbeing work behaviour
18	Stepney 2004	Clatworthy 2013	NRCT-No control							10	10	0	nr	n/a	PD	"mixed" MH conditions	90	32-50 yrs	UK	community group participation		horticultural programme	intervention at a horticultural site	No CG	Community	"horticultural site"	Group (>2 people)	face-to-face	not clear		Not clear						long-term on-going gardening projects	nr							n/a	n/a	n/a	n/a	anxiety/depression/mental health
18	Son 2004	Clatworthy 2013	RCT/quasi-RCT							50	nr	nr	nr	nr	PD	schizophrenia	nr	nr	Korea	community group participation		horticultural programme	horticultural therapy programme	TAU	Clinical - outpatient	not clear	Group (>2 people)	face-to-face	Clinician		Segregated (only for ppl with disability)						nr	nr							n/a	n/a	self esteem, interpersonal relationships, social behaviour	Significant increase in self-esteem, interpersonal relationships and social behaviour only in intervention group.	depression/anxiety
18	Rappe 2008	Clatworthy 2013, Genter 2015	Multi-methods							5	5 clients, 5 support workers	0	nr	n/a	PD	"mental health problems"/MH outpatients	nr	nr	UK	community group participation		Allotment gardening group	regular group members of an allotment group for people with MH problems	no CG	Community	community allotments	Group (>2 people)	face-to-face	Disabled people/person		Segregated (only for ppl with disability)	yes					"met regularly at a neutral venue"	nr							n/a	n/a	motivations	Motivation for gardening: being outdoors, engaged in meaningful work, social interaction, cognitive experiences social interaction on the plot was seen as supportive and affirming, as a participant noted: ‘Chatting with others was nice and brought relief to my agony’ (Rappe et al., 2008: 279)	health effects
18	Seller 1999	Genter 2015	Qualitative: other							15	15	0	nr	n/a	PD	"mental health problems"	nr	nr	UK	community group participation		Allotment gardening group	regular group members of an allotment group for people with MH problems	no CG	Community	community allotments	Group (>2 people)	face-to-face	not clear		Segregated (only for ppl with disability)	yes					"met regularly at a neutral venue"	nr							n/a	n/a	participation/belonging/friendship	1. Allotment valued as a chance to get out and do something; place to meet people and make friends; access to fresh food and to be outdoors 2. Assisted development of: communication; teamwork/planning; self-confidence and concentration
18	Fieldhouse 2003	Genter 2015	Qualitative: interviews							9	9	0	nr	n/a	PD	"mental health problems"	nr	nr	UK	community group participation		Allotment gardening group	regular group members of an allotment group for people with MH problems	no CG	Community	community allotments	Group (>2 people)	face-to-face	not clear		Segregated (only for ppl with disability)	yes					"met regularly at a neutral venue"	nr							n/a	n/a	n/a	n/a	general benefits
19	Antonioli 2005	Kamioka 2014	RCT/quasi-RCT	Social	Other	Outpatients with mild-moderate depression	nr	recruited through announcements on the internet, radio, newspapers, and hospital	nr	30	15	15	2	3	PD	mild-moderate depression	nr	nr	USA and Honduras	animal	Dolphin therapy	Dolphin therapy	Participants were asked to play, swim, and take care of the animals. They had an introductory session, to explain about dolphin behavior and water safety. The first part of the trial, which took half an hour, was structured so the participants could familiarize themselves with the animals. Participants were standing in the water, close to the trainer. The dolphin, following the trainer’s signals,…	Outdoor Nature Program: featuring the same wateractivities as the animal care program but in the absence of dolphins, to control for the influence of water and other, non-specific, environmental factors. In the outdoor nature program, participants had to swim and snorkel in the barrier coral reef for 1 h a day and had a similar degree of individualized human contact as in the animal care program.…	Clinical - outpatient	in a natural setting via the Roatan Institute for Marine Sciences, but participants were outpatients?	Group (>2 people)	face-to-face	Staff	?? not clearly described ("Trainer")	Segregated (only for ppl with disability)	yes	no	no	no	no	daily for two weeks	1 hr per day		nr	access to snorkels and swimming gear, trained dolphins	nr	dolphin trainer/biologists?	nr	n/a	n/a	n/a	n/a	Hamilton rating scale for depression Beck depression inventory Zung self rating anxiety scale
19	Adams 2018	Picton 2018	Qualitative: other						181	87	87	0	nr	n/a	PD	nr	29.8851	m=43.88	UK	community group participation		Nature based program		no CG	Community		Group (>2 people)	face-to-face			Segregated (only for ppl with disability)						nr	nr									themes	Four key inter-related themes emerged: i) escape, ii) being present, iii) SOCIAL CONTACT, and iv) personal growth. These findings suggest nature-based recovery is aided by the mutually reinforcing dynamics of being in nature, shared recognition, and support through contact with others, and greater understanding of the self.
19	Bryson 2013	Picton 2018	Qualitative: interviews							15	15	0	nr	n/a	PD	schizophrenia	nr	nr	Canada	community group participation		adventure-based therapy	Adventurebased therapy involves experiential learning, outdoor education, group counseling, and intrapersonal education.	no CG	Community		Group (>2 people)	face-to-face			Segregated (only for ppl with disability)						nr	nr									themes	Four themes from qualitative data: i) overcoming new obstacles, ii) establishing a routine, iii) making healthy changes, and iv) FORMING NEW CONNECTIONS. The intervention proved feasible with significant improvements found in engagement in the recovery process, emotional well-being, and energy level.
19	Kyriakopoulos 2011	Picton 2018	Qualitative: interviews							6	6	0	nr	n/a	PD	anxiety/depression	nr	nr	UK	community group participation		adventure therapy	adventure therapy + one-on-one counselling sessions before outdoor experience	no CG	Community		Group (>2 people)	face-to-face			Segregated (only for ppl with disability)						10-15 counselling sessions	nr									themes	Four domains were identified: i) enhancing intrapersonal relationships, ii) IMPROVING INTERPERSONAL RELATIONSHIPS, iii) providing an experiential outdoor venue for achieving therapeutic change, iv) offering a secure, personal place for achieving inner healing. Twelve themes: i) improving self-concept, ii) raising confidence, iii) increasing motivation to make lifestyle changes, iv) overcoming ini…
19	Picton 2018 - ref 55	Picton 2018	Qualitative: interviews							5	5	0	nr	n/a	PD	nr	nr	nr	Australia	community group participation		outdoor adventure camp		no CG	Community		Group (>2 people)	face-to-face			Segregated (only for ppl with disability)						nr	nr									themes	‘‘connection with nature’’ and comprised four elements: i) APPRECIATION AND CONNECTION, ii) mindfulness and distraction, iii) vitality, and iv) sustains physical activity.
19	Moxham 2017	Picton 2018	Qualitative: other							27	27	0	nr	n/a	PD	MH consumers	nr	nr	Australia	community group participation		recovery camp	Recovery camp is a five-day therapeutic recreation program, bringing together people with a serious mental illness, undergraduate health students, and staff members.	no CG	Community		Group (>2 people)	face-to-face			Segregated (only for ppl with disability)						5-day program	nr									themes	Four key themes were identified: i) CONNECTEDNESS, ii) developing healthy habits, iii) challenging oneself, and iv) recovery
19	Picton 2018 - ref 20	Picton 2018	Qualitative: interviews							5	5	0	nr	n/a	PD	"mental illness"	nr	nr	Australia	community group participation		adventure camp	recovery-oriented program/adventure camp	no CG	Community		Group (>2 people)	face-to-face			Segregated (only for ppl with disability)						nr	nr									themes	Five themes were identified: i) self-determination, ii) participation, iii) extending self, iv) RELATIONSHIPS, and v) positive change, empowerment identified as the core essence of meaning.
19	Petryshen 2001	Masi 2011	NRCT-No control	Community	Participation	Community-dwelling adults who were socially isolated and living with a serious and persistent mental health problem	nr	people eligible for social recreation program in canadian community mental health centre	nr	36	36	0	nr	n/a	PD	serious and persistent mental health problem	39	18-65, m=43 years	Canada	support for social participation (e.g., social prescribing)	loneliness ints- community dwelling w SMI loneliness ints- psych disruption > traumatic birth experience loneliness ints- adults w physical/MH probs living alone loneliness ints- depressed/traumatised seniors loneliness ints- undergrads w moderate depression on BDI loneliness ints- older adults w suicidal ideation, depression, isolation loneliness ints- naval treinees w BDI > 30 or at-risk stress	Social recreation intervention	Social recreation intervention, which included information sessions about opportunities and resources in the community, workshops on relationship development, workshops on healthy lifestyles, self-help groups, weekly community walks, and community forums on mental illness. Approximately 200 group activities	no CG	Clinical - outpatient	Mental Health Centre	Group (>2 people)	face-to-face	Staff	not clearly described		yes	not clear	not clear	not clear	not clear	nr	nr	see description	nr	nr	nr	nr	nr	n/a	n/a	4-item UCLA Loneliness Scale	Effect size: -0.59 (95%CI: -0.88, -0.30)	n/a
20	Carless 31 2008	Quirk 2020	Qualitative: other	Community	Participation	nr	nr	nr	nr	11	11	0	nr	n/a	PD	specific conditions nr	100	24-43 years	nr - probably UK	sport/physical activity	physical activity in community groups	physical activity in community groups: various sports	Various exercise or sport activities, including golf, five-a-side football, badminton, tennis, swimming, walking groups, gardening, gymbased exercise, and running	no CG	Disability activity setting (e.g., day centre)	all had to be "community group" for inclusion	Group (>2 people)	face-to-face	Clinician	Day center, and mental health professional. A clinical psychologist, a senior physiotherapist, two care workers, two occupational managers, and an exercise leader	Not clear	yes	not clear	not clear	not clear	not clear	nr	nr		nr	nr	nr	multidisciplinary team	nr	see themes summary	see themes summary	see themes summary	see themes summary	see themes summary
20	Carless 32 2012	Quirk 2020	Qualitative: other	Community	Participation	nr	nr	nr	nr	3	3	0	nr	n/a	PD	SMI (e.g., schizophrenia, bipolar)	0	nr	UK	sport/physical activity	physical activity in community groups	physical activity in community groups: various sports	Gym-based exercise, badminton, and tennis coaching sessions	no CG	Community	all had to be "community group" for inclusion	Group (>2 people)	face-to-face	None	self-initiated sport participation	Not clear	not clear	not clear	not clear	not clear	not clear	nr	nr	nr	nr	nr	nr	nr	nr	see themes summary	see themes summary	see themes summary	see themes summary	see themes summary
20	Carless 13 2008	Quirk 2020	Qualitative: other	Community	Participation	nr	nr	nr	nr	3	3	0	nr	n/a	PD	SMI including schizophrenia	100	nr	UK	sport/physical activity	physical activity in community groups	physical activity in community groups: various sports	Gym-based exercise, football, badminton, walking, and swimming	no CG	Community	all had to be "community group" for inclusion	Group (>2 people)	face-to-face	Clinician	Physiotherapists and occupational therapists. No mention of mental health services. “Chaps would come round and take us out”	Not clear	yes	not clear	not clear	not clear	not clear	6-months, frequency nr	nr		nr	nr	nr	Physio, OT, ?? volunteers ??	nr	see themes summary	see themes summary	see themes summary	see themes summary	see themes summary
20	Graham 36 2017	Quirk 2020	Qualitative: other	Community	Participation	nr	nr	nr	nr	3	3	0	nr	n/a	PD	Schizophrenia	66.7	nr	UK	sport/physical activity	physical activity in community groups	physical activity in community groups	Walking, yoga, and lowimpact fitness program	no CG	Community	all had to be "community group" for inclusion	Group (>2 people)	face-to-face	Peer	peer led walking or yoga program. Exercise duration and difficulty (beginner or advanced) were increased gradually and according to clients’ abilities	Segregated (only for ppl with disability)	yes	no	no	no	no	2 X week for 12 months (walking group) or 7 weeks (yoga group)	45 minutes - 1.25 hr per session (walking) or 1-1.5 hrs per session (yoga)		nr	nr	nr	nr	nr	see themes summary	see themes summary	see themes summary	see themes summary	see themes summary
20	Hodgson 37 2011	Quirk 2020	Qualitative: other	Community	Participation	nr	nr	nr	nr	17	17	0	nr	n/a	PD	SMI	82.3529	m=41.4 (male) m=43 (female); 18-25 years	nr	sport/physical activity	physical activity in community groups	physical activity in community groups	1) Men-only football; 2) “ACTIVE” program (15 sports and activity groups including basketball, tennis, walking, football, and badminton.	no CG	Community	all had to be "community group" for inclusion	Group (>2 people)	face-to-face	not clear	nr	Not clear	yes	not clear	not clear	not clear	not clear	football: 3 months, frequency nr; ACTIVE attendees: duration nr	nr		nr	nr	nr	nr	nr	see themes summary	see themes summary	see themes summary	see themes summary	see themes summary
20	Hoffman 38 2013	Quirk 2020	Qualitative: other	Community	Participation	nr	nr	nr	nr	14	14	0	nr	n/a	PD	schizophrenia/schizoaffective disorder	42.8571	18+	USA	sport/physical activity	physical activity in community groups	physical activity in community groups	Physical activity programs in the community	no CG	Community	all had to be "community group" for inclusion	Group (>2 people)	face-to-face	not clear	nr	Not clear	not clear	not clear	not clear	not clear	not clear	nr	nr		nr	nr	nr	nr	nr	see themes summary	see themes summary	see themes summary	see themes summary	see themes summary
20	Irving 39 2003	Quirk 2020	Qualitative: other	Community	Participation	nr	nr	nr	nr	nr	nr	0	nr	n/a	PD	SMI	nr	nr	UK	sport/physical activity	physical activity in community groups	physical activity in community groups	Physical activity/team games	no CG	Community	all had to be "community group" for inclusion	Group (>2 people)	face-to-face	not clear	nr	Not clear	not clear	not clear	not clear	not clear	not clear	weekly, duration nr	1.5 hr per week		nr	nr	nr	nr	nr	see themes summary	see themes summary	see themes summary	see themes summary	see themes summary
20	Carless 28 2007	Quirk 2020	Qualitative: other	Community	Participation	nr	nr	nr	nr	4	4	0	nr	n/a	PD	Schizophrenia	100	nr	UK	sport/physical activity	physical activity in community groups	physical activity in community groups	Walking, running, gardening, gym-based exercise, soccer, badminton, swimming, and tennis	no CG	Disability activity setting (e.g., day centre)	all had to be "community group" for inclusion	Individual and group	face-to-face	Clinician	physiotherapists	Segregated (only for ppl with disability)	yes	no	no	no	no	ongoing, frequency nr	nr		nr	nr	nr	nr	nr	see themes summary	see themes summary	see themes summary	see themes summary	see themes summary
20	Carless 30 2008	Quirk 2020	Qualitative: other	Community	Participation	nr	nr	nr	nr	11	11	0	nr	n/a	PD	specific conditions nr	100	24-43 years	UK	sport/physical activity	physical activity in community groups	physical activity in community groups: various	Various (nr)	no CG	Community	all had to be "community group" for inclusion	Group (>2 people)	face-to-face	not clear	not reported	Not clear	yes	not clear	not clear	not clear	not clear	not clear	not clear		nr	nr	nr	nr	nr	see themes summary	see themes summary	see themes summary	see themes summary	see themes summary
20	Evans 34 2017	Quirk 2020	Qualitative: other	Community	Participation	nr	nr	nr	nr	5	5	0	nr	n/a	PD	Schizophrenia	80	nr	UK	sport/physical activity	physical activity in community groups	physical activity in community groups: water-based	Aquatic leisure/swimming session	no CG	Community	all had to be "community group" for inclusion	Group (>2 people)	face-to-face	Staff	Support workers attended the swimming sessions with clients	Segregated (only for ppl with disability)	yes	not clear	yes	not clear	not clear	weekly X 1 year	1 hr per week		nr	nr	nr	nr	nr	see themes summary	see themes summary	see themes summary	see themes summary	see themes summary
20	Bizub 27 2003	Quirk 2020	Qualitative: interviews	Community	Participation	nr	nr	nr	nr	5	5	0	nr	n/a	PD	Schizophrenia	60	nr	USA	sport/physical activity	physical activity in community groups	physical activity in community groups: horse riding	Horse-riding, low-moderate intensity	no CG	Community	all had to be "community group" for inclusion	Group (>2 people)	face-to-face	Clinician	facilitated (clinician nr) and "volunteers"	Segregated (only for ppl with disability)	yes	not clear	no	no	no	weekly for 10 weeks	2 hr per week		nr	horse-riding facility	nr	nr	nr	see themes summary	see themes summary	see themes summary	see themes summary	see themes summary
20	Carless 29 2004	Quirk 2020	Qualitative: interviews	Community	Participation	nr	nr	nr	nr	9	9	0	nr	n/a	PD	SMI	100	nr	UK	sport/physical activity	physical activity in community groups	physical activity in community groups: golf	Sport: golf—made less competitive	no CG	Community	all had to be "community group" for inclusion	Group (>2 people)	face-to-face	Clinician	Support from mental health professionals in the form of phone calls	Not clear	yes	not clear	not clear	not clear	not clear	9 weeks, fequency nr	nr		nr	nr	nr	nr	nr	see themes summary	see themes summary	see themes summary	see themes summary	see themes summary
20	Faulkner 35 1999	Quirk 2020, Soundy 2014	Case study (not multiple baseline)	Community	Participation	nr	nr	nr	nr	3	3	0	0	n/a	PD	Schizophrenia	66.7	"middle aged"	UK	sport/physical activity	physical activity in community groups	physical activity in community groups: walking and swimming	Consideration to the role of exercise (walking and swimming) in the lives of individuals with schizophrenia	no CG	Residential/home	Psychiatric residential unit	Not applicable	face-to-face	None	not clear - Key workers were not present at exercise sessions	Both integrated and segregated	not clear	not clear	not clear	not clear	not clear	2 X week for 10 weeks	30 minutes per session		nr	nr	nr	nr	nr	n/a	n/a	positive interactions community participation	* patients benefitted from positive interactions while undertaking physical activity * patients engaging in physical activity reported having confidence and self-esteem to engage more in the community * Being part of a physical activity group had several benefits for patients including providing positive relationships and connection to others	other context/effects
20	Crone 33 2007	Quirk 2020	Qualitative: other	Community	Participation	nr	nr	nr	nr	4	4	0	nr	n/a	PD	specific conditions nr	50	nr	UK	sport/physical activity	physical activity in community groups	physical activity in community groups: walking	Walking	no CG	Community	all had to be "community group" for inclusion	Group (>2 people)	face-to-face	not clear	nr	Not clear	not clear	not clear	not clear	not clear	not clear	monthly, duration nr	nr		nr	nr	nr	nr	nr	see themes summary	see themes summary	see themes summary	see themes summary	see themes summary
20	Roberts 2013	Soundy 2014	Qualitative: other	Community	Capacity and participation	nr	nr	nr	nr	8	8	0	nr	n/a	PD	Schizophrenia	75	24-66 years	nr	sport/physical activity	Physical activity participation	Physical activity participation	Lifestyle intervention - not described further	no CG	Community	"private setting"	Group (>2 people)	not clear	not clear	not really relevant	Both integrated and segregated	not clear	not clear	not clear	not clear	not clear	n/a	n/a		nr	nr	nr	nr	nr	see themes summary	see themes summary	see themes summary	see themes summary	see themes summary
20	Yarborough 41 2016	Quirk 2020	Mixed methods	Community	Participation	nr	nr	nr	nr	48	nr	nr	nr	nr	PD	schizophrenia/schizoaffective disorder, bipolar, affective psychosis, PTSD	36	m=48	USA	sport/physical activity	physical activity in community groups	physical activity in community groups	Diet and exercise intervention	CG not described	Community	all had to be "community group" for inclusion	Group (>2 people)	face-to-face	Clinician	mental health counselor and another interventionist familiar with nutrition interventions.	Segregated (only for ppl with disability)	yes	no	no	no	no	weekly, 24 meetings	nr		nr	nr	nr	nr	nr	see themes summary	see themes summary	see themes summary	see themes summary	see themes summary
20	Wardig 40 2013	Quirk 2020	Qualitative: other	Community	Participation	nr	nr	nr	nr	40	40	0	nr	n/a	PD	psychosis diagnosis	52.5	m=46, 27-66 years	Sweden	sport/physical activity	physical activity in community groups	Lifestyle intervention	Lifestyle intervention - not described further	no CG	Community	all had to be "community group" for inclusion	Group (>2 people)	face-to-face	not clear	nr	Not clear	not clear	not clear	not clear	not clear	not clear	weekly, duration nr	nr		nr	nr	nr	nr	nr	see themes summary	see themes summary	see themes summary	see themes summary	see themes summary
20	Fogarty 2005	Soundy 2014	Qualitative: focus groups	Community	Capacity and participation	nr	nr	nr	nr	6	6	0	nr	n/a	PD	Schizophrenia	100	20-42 years	nr	sport/physical activity	Physical activity participation	Physical activity participation	physical and psychological impacts of physical activity following a tailored intervention	no CG	Clinical - outpatient	MH community unit	Not applicable	not clear	not clear	not really relevant	Both integrated and segregated	not clear	not clear	not clear	not clear	not clear	n/a	n/a		nr	nr	nr	nr	nr	see themes summary	see themes summary	see themes summary	see themes summary	see themes summary
20	Johnstone 2009	Soundy 2014	Qualitative: interviews	Community	Capacity and participation	nr	nr	nr	nr	27	27	0	nr	n/a	PD	Schizophrenia	59.2593	m=43, 24-64 years	nr	sport/physical activity	Physical activity participation	Physical activity participation	exploring barriers to physical activity	no CG	Clinical - outpatient	MH community unit	Not applicable	not clear	not clear	not really relevant	Both integrated and segregated	not clear	not clear	not clear	not clear	not clear	n/a	n/a		nr	nr	nr	nr	nr	see themes summary	see themes summary	see themes summary	see themes summary	see themes summary
20	Weissman 2006	Soundy 2014	Qualitative: focus groups	Community	Capacity and participation	nr	nr	nr	nr	23	23	0	nr	n/a	PD	Schizophrenia	nr	m=50	nr	sport/physical activity	Physical activity participation	Physical activity participation	thoughts about weight loss	no CG	Clinical - outpatient	Veteran affairs medical centre	Not applicable	not clear	not clear	not really relevant	Both integrated and segregated	not clear	not clear	not clear	not clear	not clear	n/a	n/a		nr	nr	nr	nr	nr	see themes summary	see themes summary	see themes summary	see themes summary	see themes summary
20	Leutwyler 2013	Soundy 2014	Qualitative: focus groups	Community	Capacity and participation	nr	nr	nr	nr	16	16	0	nr	n/a	PD	Schizophrenia	nr	nr	nr	sport/physical activity	Physical activity participation	Physical activity participation	barriers/facilitators to physical activity	no CG	Community	participants in the community	Not applicable	not clear	not clear	not really relevant	Both integrated and segregated	not clear	not clear	not clear	not clear	not clear	n/a	n/a		nr	nr	nr	nr	nr	see themes summary	see themes summary	see themes summary	see themes summary	see themes summary
20	Gorczynski 2013	Soundy 2014	Qualitative: interviews	Community	Capacity and participation	nr	nr	nr	nr	25	25	0	nr	n/a	PD	Schizophrenia	nr	nr	nr	sport/physical activity	Physical activity participation	Physical activity participation	factors/experiences/views from local environment	no CG	Clinical - outpatient	Centre for addiction and mental health	Not applicable	not clear	not clear	not really relevant	Both integrated and segregated	not clear	not clear	not clear	not clear	not clear	n/a	n/a		nr	nr	nr	nr	nr	see themes summary	see themes summary	see themes summary	see themes summary	see themes summary
20	Leutwyler 2012	Soundy 2014	Qualitative: interviews	Community	Capacity and participation	nr	nr	nr	nr	34 clinical staff	34 clinical staff	0	nr	n/a	PD	Schizophrenia	Staff: nr	Staff: nr	nr	sport/physical activity	Physical activity participation	Physical activity participation	exploring barriers/facilitators to physical activity	no CG	Clinical - outpatient	psychiatric sites	Not applicable	not clear	not clear	not really relevant	Both integrated and segregated	not clear	not clear	not clear	not clear	not clear	n/a	n/a		nr	nr	nr	nr	nr	see themes summary	see themes summary	see themes summary	see themes summary	see themes summary
20	Happell 2012	Soundy 2014	Qualitative: focus groups	Community	Capacity and participation	nr	nr	nr	nr	38 nurses	38 nurses	0	nr	n/a	PD	Schizophrenia	Staff: nr	Staff: nr	nr	sport/physical activity	Physical activity participation	Physical activity participation	physical activity of ppl w SMI	no CG	Clinical - inpatient	community MH and inpatient settings	Not applicable	not clear	not clear	not really relevant	Both integrated and segregated	not clear	not clear	not clear	not clear	not clear	n/a	n/a		nr	nr	nr	nr	nr	see themes summary	see themes summary	see themes summary	see themes summary	see themes summary
20	Hedlund 2013	Soundy 2014	Qualitative: interviews	Community	Capacity and participation	nr	nr	nr	nr	8 physiotherapists	8 physiotherapists	0	nr	n/a	PD	Schizophrenia	staff: 0.0	Staff: m=41, 30-67 years	nr	sport/physical activity	Physical activity participation	Physical activity participation	physiotherapist use, experience and attitudes of basic body awareness training	no CG	Clinical - outpatient	"physio outpatient unit"	Not applicable	not clear	not clear	not really relevant	Both integrated and segregated	not clear	not clear	not clear	not clear	not clear	n/a	n/a		nr	nr	nr	nr	nr	see themes summary	see themes summary	see themes summary	see themes summary	see themes summary
20	Bassilios et al. 2014	Firth 2016	Not clear	Community	Participation	nr	nr	nr	nr	49	nr	nr	nr	nr	PD	Schizophrenia/schizoaffective disorder	nr	m=39	Australia	sport/physical activity	physical activity/exercise participation - study reported motivators and barriers	physical activity/exercise participation - study reported motivators and barriers	not described	not described	Clinical - outpatient	Community mental health	Not clear	not clear	not clear	not described/reported	Not clear	not clear	not clear	not clear	not clear	not clear	nr	nr		nr	nr	nr	nr	nr	see meta-analysis/themes summary	see meta-analysis/themes summary	see meta-analysis/themes summary	see meta-analysis/themes summary	see meta-analysis/themes summary
20	Carpiniello et al. 2013	Firth 2016	Not clear	Community	Participation	nr	nr	nr	nr	138	nr	nr	nr	nr	PD	Schizophrenia, Major Depression, Bipolar	nr	m=50	Italy	sport/physical activity	physical activity/exercise participation - study reported motivators and barriers	physical activity/exercise participation - study reported motivators and barriers	not described	not described	Clinical - outpatient	Community mental health	Not clear	not clear	not clear	not described/reported	Not clear	not clear	not clear	not clear	not clear	not clear	nr	nr		nr	nr	nr	nr	nr	see meta-analysis/themes summary	see meta-analysis/themes summary	see meta-analysis/themes summary	see meta-analysis/themes summary	see meta-analysis/themes summary
20	Deighton et al. 2014	Firth 2016	Not clear	Community	Participation	nr	nr	nr	nr	40	nr	nr	nr	nr	PD	FEP	nr	m=19.8	Canada	sport/physical activity	physical activity/exercise participation - study reported motivators and barriers	physical activity/exercise participation - study reported motivators and barriers	not described	not described	Clinical - outpatient	Early Intervention Services	Not clear	not clear	not clear	not described/reported	Not clear	not clear	not clear	not clear	not clear	not clear	nr	nr		nr	nr	nr	nr	nr	see meta-analysis/themes summary	see meta-analysis/themes summary	see meta-analysis/themes summary	see meta-analysis/themes summary	see meta-analysis/themes summary
20	Faulkner et al. 2007	Firth 2016	Not clear	Community	Participation	nr	nr	nr	nr	109	nr	nr	nr	nr	PD	Schizophrenia, Major Depression, Bipolar	nr	m=46.5	Canada	sport/physical activity	physical activity/exercise participation - study reported motivators and barriers	physical activity/exercise participation - study reported motivators and barriers	not described	not described	Clinical - outpatient	Mental health and addiction facility	Not clear	not clear	not clear	not described/reported	Not clear	not clear	not clear	not clear	not clear	not clear	nr	nr		nr	nr	nr	nr	nr	see meta-analysis/themes summary	see meta-analysis/themes summary	see meta-analysis/themes summary	see meta-analysis/themes summary	see meta-analysis/themes summary
20	Firth et al. 2016a-b & 2018	Firth 2016	Not clear	Community	Participation	nr	nr	nr	nr	28	nr	nr	nr	nr	PD	FEP	nr	m=25.5	UK	sport/physical activity	physical activity/exercise participation - study reported motivators and barriers	physical activity/exercise participation - study reported motivators and barriers	not described	not described	Clinical - outpatient	Early Intervention services	Not clear	not clear	not clear	not described/reported	Not clear	not clear	not clear	not clear	not clear	not clear	nr	nr		nr	nr	nr	nr	nr	see meta-analysis/themes summary	see meta-analysis/themes summary	see meta-analysis/themes summary	see meta-analysis/themes summary	see meta-analysis/themes summary
20	Fraser et al. 2015	Firth 2016	Not clear	Community	Participation	nr	nr	nr	nr	101	nr	nr	nr	nr	PD	Schizophrenia, Major Depression, Bipolar	nr	m=40.7	Australia	sport/physical activity	physical activity/exercise participation - study reported motivators and barriers	physical activity/exercise participation - study reported motivators and barriers	not described	not described	Clinical - inpatient	Inpatient unit	Not clear	not clear	not clear	not described/reported	Not clear	not clear	not clear	not clear	not clear	not clear	nr	nr		nr	nr	nr	nr	nr	see meta-analysis/themes summary	see meta-analysis/themes summary	see meta-analysis/themes summary	see meta-analysis/themes summary	see meta-analysis/themes summary
20	Gorczynski et al. 2010	Firth 2016	Not clear	Community	Participation	nr	nr	nr	nr	54	nr	nr	nr	nr	PD	SMI	nr	m=46.7	Canada	sport/physical activity	physical activity/exercise participation - study reported motivators and barriers	physical activity/exercise participation - study reported motivators and barriers	not described	not described	Clinical - outpatient	Outpatient satellite clinic	Not clear	not clear	not clear	not described/reported	Not clear	not clear	not clear	not clear	not clear	not clear	nr	nr		nr	nr	nr	nr	nr	see meta-analysis/themes summary	see meta-analysis/themes summary	see meta-analysis/themes summary	see meta-analysis/themes summary	see meta-analysis/themes summary
20	Kane et al. 2012	Firth 2016	Not clear	Community	Participation	nr	nr	nr	nr	12	nr	nr	nr	nr	PD	Schizophrenia	nr	m=43.25	USA	sport/physical activity	physical activity/exercise participation - study reported motivators and barriers	physical activity/exercise participation - study reported motivators and barriers	not described	not described	Clinical - outpatient	Outpatient clinics	Not clear	not clear	not clear	not described/reported	Not clear	not clear	not clear	not clear	not clear	not clear	nr	nr		nr	nr	nr	nr	nr	see meta-analysis/themes summary	see meta-analysis/themes summary	see meta-analysis/themes summary	see meta-analysis/themes summary	see meta-analysis/themes summary
20	Klingaman et al. 2014	Firth 2016	Not clear	Community	Participation	nr	nr	nr	nr	5388	nr	nr	nr	nr	PD	Schizophrenia	nr	m=55	USA	sport/physical activity	physical activity/exercise participation - study reported motivators and barriers	physical activity/exercise participation - study reported motivators and barriers	not described	not described	Community	‘Veteran Affairs’ database	Not clear	not clear	not clear	not described/reported	Not clear	not clear	not clear	not clear	not clear	not clear	nr	nr		nr	nr	nr	nr	nr	see meta-analysis/themes summary	see meta-analysis/themes summary	see meta-analysis/themes summary	see meta-analysis/themes summary	see meta-analysis/themes summary
20	Sylvia et al. 2009	Firth 2016	Not clear	Community	Participation	nr	nr	nr	nr	86	nr	nr	nr	nr	PD	SZ, MDD or BP	nr	m=37	USA	sport/physical activity	physical activity/exercise participation - study reported motivators and barriers	physical activity/exercise participation - study reported motivators and barriers	not described	not described	Clinical - inpatient	Partial hospital program	Not clear	not clear	not clear	not described/reported	Not clear	not clear	not clear	not clear	not clear	not clear	nr	nr		nr	nr	nr	nr	nr	see meta-analysis/themes summary	see meta-analysis/themes summary	see meta-analysis/themes summary	see meta-analysis/themes summary	see meta-analysis/themes summary
20	Ussher et al. 2007	Firth 2016	Not clear	Community	Participation	nr	nr	nr	nr	120	nr	nr	nr	nr	PD	SMI	nr	m=42.6	UK	sport/physical activity	physical activity/exercise participation - study reported motivators and barriers	physical activity/exercise participation - study reported motivators and barriers	not described	not described	Clinical - inpatient	Inpatients and outpatients	Not clear	not clear	not clear	not described/reported	Not clear	not clear	not clear	not clear	not clear	not clear	nr	nr		nr	nr	nr	nr	nr	see meta-analysis/themes summary	see meta-analysis/themes summary	see meta-analysis/themes summary	see meta-analysis/themes summary	see meta-analysis/themes summary
20	Wynaden et al. 2012	Firth 2016	Not clear	Community	Participation	nr	nr	nr	nr	56	nr	nr	nr	nr	PD	“mostly psychotic illness”	nr	19-50 years	Australia	sport/physical activity	physical activity/exercise participation - study reported motivators and barriers	physical activity/exercise participation - study reported motivators and barriers	not described	not described	Clinical - outpatient	Forensic mental health services	Not clear	not clear	not clear	not described/reported	Not clear	not clear	not clear	not clear	not clear	not clear	nr	nr		nr	nr	nr	nr	nr	see meta-analysis/themes summary	see meta-analysis/themes summary	see meta-analysis/themes summary	see meta-analysis/themes summary	see meta-analysis/themes summary
21	Moloney 2017	Picton 2018	Qualitative: interviews							6	6	0	nr	n/a	PD	psychosis	100	nr	Ireland	sport/physical activity		football program		no CG	Community		Group (>2 people)	face-to-face			Segregated (only for ppl with disability)						nr	nr									themes	Four themes were identified: i) positive experiences of playing football, ii) football as part of a weekly routine, iii) improvements in skills, and iv) environmental factors (physical and social).
21	Lamont 2017	Picton 2018	Qualitative: focus groups							18	18 with PSD 7 staff	0	nr	n/a	PD	nr	nr	nr	UK	sport/physical activity		football	"walking" football and regular football	no CG	Community		Group (>2 people)	face-to-face			Segregated (only for ppl with disability)						nr	nr									themes	Four themes were identified: i) RELATIONAL, ii) recovery, iii) competition and collaboration, and iv) barriers and concerns. Collaborative football groups were perceived by participants as a conduit for recovery and an important aspect of mental health care delivery. Playing football was associated with a sense of well-being, and enhanced relationships between service users and staff.
21	Battaglia 2013	Firth 2015	RCT/quasi-RCT	Community	Capacity	nr	nr	nr	nr	20	12	8	2	n/a	PD	Schizophrenia/schizoaffective disorder	nr	m=36	nr	sport/physical activity	Soccer training	Soccer training	Soccer training. Sessions totalled 2 h including warm-up, social time, etc. 60 min of each session was active training, consisting of football matches and skills training	TAU	not reported	not clear/described	Group (>2 people)	face-to-face	not clear	"supervised" but not clear by who	Not clear	not clear	Not clear	no	no	no	2 X week for 12 weeks	2 hr per session		nr	nr	nr	nr	nr	n/a	n/a	n/a	n/a	P1: physical health P2: CV fitness M2: QoL
21	Darongkamas 2011	Picton 2018	Qualitative: interviews							15	15	0	nr	n/a	PD	nr	66.6	m=33, r: 24-50	UK	sport/physical activity		soccer team		no CG	Community		Group (>2 people)	face-to-face			Segregated (only for ppl with disability)						nr	nr									themes	Five themes identified: i) SOCIAL INCLUSION, ii) changes in attitude/ behavior, iii) empowerment and importance of the club, iv) changes to mental health, and v) self-confidence. The results are in keeping with previous evidence suggesting that football is a useful supplement to traditional interventions and can reduce social isolation.
21	Mason 2012	Picton 2018	Qualitative: interviews							12	12 participants, 2 coaches, 5 referrers	0	nr	n/a	PD	nr	100	m=28.2, r: 20-45 years	UK	sport/physical activity		soccer		no CG	Community		Group (>2 people)	face-to-face			Segregated (only for ppl with disability)						nr	nr									themes	Six themes were identified: i) identifying with past self, ii) service with a difference, iii) OPENING UP THE SOCIAL WORLD: BREAKING ISOLATION, OFFERING STRUCTURE AND FRIENDSHIP, iv) psychological safety: self-expression, mutual support, and belonging, v) ‘‘feeling good’’: fitness, health, and enjoyment, vi) empowerment: achieving, developing confidence, competing, and moving on.
21	Magee 2015	Picton 2018	Qualitative: interviews							20	20 with PSD, 5 coaches 13 MH clinicians/management	0	nr	n/a	PD	"mental illness"	nr	nr	UK	sport/physical activity		soccer	soccer and discussion group	no CG	Community		Group (>2 people)	face-to-face			Segregated (only for ppl with disability)						nr	nr									themes	Three themes were identified: i) client engagement, ii) the reduction of stigma, and iii) COUNTERING SOCIAL ISOLATION.
21	Carless 2008 - different reference to the 2008 pubs included in Quirk	Picton 2018	Qualitative: other							11	11	0	nr	n/a	PD	serious mental illness	100	24-43 years	UK	sport/physical activity		sport and exercise		no CG	Community		Group (>2 people)	face-to-face			Segregated (only for ppl with disability)						nr	nr											themes
21	Clark 1991	Picton 2018	Qualitative: interviews						43	7	7	0	nr	n/a	PD	"psychiatric disabilities"	100	nr	Canada	sport/physical activity		whitewater canoe trip		no CG	Community		Group (>2 people)	face-to-face			Segregated (only for ppl with disability)						nr	nr									themes	i) increased abilities to experience pleasure, ii) TALKING WITH ONE ANOTHER and iii) feeling A SENSE OF BELONGING.
21	Priest 2007	Picton 2018	Qualitative: other							14	14	0	nr	n/a	PD	"mental illness"	nr	nr	UK	sport/physical activity		walking group		no CG	Community		Group (>2 people)	face-to-face			Segregated (only for ppl with disability)						nr	nr											themes
21	Bizub 2003	Picton 2018	Qualitative: interviews							5	5	0	nr	n/a	PD	longterm PSD	nr	nr	USA	sport/physical activity		horseback riding	therapeutic horseback riding program + post-program group with artistic and creative exercises	no CG	Community		Group (>2 people)	face-to-face			Segregated (only for ppl with disability)						10-weeks	nr											themes
21	Corring 2013	Picton 2018	Qualitative: interviews							6	6 ppl w PD, 6 staff	0	nr	n/a	PD	schizophrenia or schizoaffective disorder	nr	nr	Canada	sport/physical activity		horseback riding		no CG	Community		Group (>2 people)	face-to-face			Segregated (only for ppl with disability)						nr	nr									themes	Four themes identified: i) having fun, ii) bonding relationship with horse, iii) increased confidence, and iv) self-esteem and RELATIONSHIP GAINS
21	Duraiswamy 2007	Firth 2015	RCT/quasi-RCT	Community	Capacity	nr	nr	nr	nr	61	31	30	10	nr	PD	Schizophrenia	nr	m=32	nr	sport/physical activity	Yoga	Yoga Group	National Fitness Corps Programme. See Behere et al. (2011). Supervised for 15 days, then continued alone	NFP	not reported	not clear/described	Individual	face-to-face	Teacher	supervised by yoga instructor for 15 days, then continued alone	Not clear	not clear	Not clear	no	no	no	5 X week for 16 weeks	60 minutes per session		nr	nr	nr	nr	nr	n/a	n/a	n/a	n/a	M1: symptoms M2: QoL/overall mental health/need for care M3: depression
21	Behere 2011	Firth 2015	RCT/quasi-RCT	Community	Capacity	nr	nr	nr	nr	91	34	31 (NFP), 26 (waitlist)	14	nr	PD	Schizophrenia	nr	m=32	nr	sport/physical activity	Yoga	Yoga Group	National Fitness Corps Programme. 10 min walking. 5 min self-paced jogging. 45 min of postures. Supervised by a yoga instructor 5 days per week for 1 month, then continued alone	CG1: NFP CG2: waitlist	not reported	not clear/described	Individual	face-to-face	Teacher	supervised by yoga instructor for 1m, then continued alone	Not clear	not clear	Not clear	no	no	no	5 X week for 16 weeks	60 minutes per session		nr	nr	nr	nr	nr	n/a	n/a	n/a	n/a	M1: symptoms
21	Varambally 2012	Firth 2015	RCT/quasi-RCT	Community	Capacity	nr	nr	nr	nr	120	47	37 (NFP), 36 (waitlist)	22	nr	PD	Schizophrenia	nr	m=33	nr	sport/physical activity	Yoga	Yoga Group	National Fitness Corps Programme. See Behere et al. (2011). Supervised for 1 month, then continued alone	CG1: NFP CG2: waitlist	not reported	not clear/described	Individual	face-to-face	Teacher	supervised by yoga instructor for 1m, then continued alone	Not clear	not clear	Not clear	no	no	no	5 X week for 16 weeks	60 minutes per session		nr	nr	nr	nr	nr	n/a	n/a	n/a	n/a	M1: symptoms M2: QoL/overall mental health/need for care
21	Manjunath 2013	Firth 2015	RCT/quasi-RCT	Community	Capacity	nr	nr	nr	nr	88	44	44	19	nr	PD	Schizophrenia	nr	m=32	nr	sport/physical activity	Yoga	Yoga Group	National Fitness Corps Programme. See Behere et al. (2011). Supervised for 2 weeks, then continued alone	Exercise group	not reported	not clear/described	Individual	face-to-face	Teacher	supervised by yoga instructor for 2 weeks, then continued alone	Not clear	not clear	Not clear	no	no	no	5 X week for 16 weeks	60 minutes per session		nr	nr	nr	nr	nr	n/a	n/a	n/a	n/a	M1: symptoms M2: QoL/overall mental health/need for care M3: depression
21	Acil 2008	Firth 2015	RCT/quasi-RCT	Community	Capacity	nr	nr	nr	nr	30	15	15	0	nr	PD	Schizophrenia	nr	m=30	nr	sport/physical activity	aerobic training/exercise or HIT	Aerobic exercise	Home-based aerobic exercise plan. 10 min stretching. 25 min aerobic work-out with heart rate feedback. 5 min cool down/stretches	TAU	Residential/home	home-based program	Individual	unsupervised	not clear	not described	Segregated (only for ppl with disability)	no	no	no	no	no	3 X week for 10 weeks	75 minutes per week		nr	nr	nr	nr	nr	n/a	n/a	n/a	n/a	M1: symptoms M2: QoL M3: anxiety and depression
21	Abdel-Baki 2013	Firth 2015	NRCT-No control	Community	Capacity	nr	nr	nr	nr	25	25	0	9	n/a	PD	FEP	nr	m=25	nr	sport/physical activity	aerobic training/exercise or HIT	Aerobic interval training	Supervised aerobic interval training. 5 min warm-up. 10 × 30 s running intervals (with 90 s of walking between each). 5 min cool-down	no CG	not reported	not described	Individual	face-to-face	not clear	not described	Not clear	not clear	not clear	not clear	not clear	not clear	2 X week for 14 weeks	40 minutes per week		nr	nr	nr	nr	nr	n/a	n/a	psychosocial functioning (GAF, SOFAS)	no change	P1. physical health P2. fitness M1. illness severity (CGI-S)
21	Heggelund 2011	Firth 2015	NRCT	Community	Capacity	nr	nr	nr	nr	25	16	9	4	nr	PD	Schizophrenia/schizoaffective disorder/delusional disorder	nr	m=34	nr	sport/physical activity	aerobic training/exercise or HIT	HIT program	High intensity interval training. Four bouts of 4 min running with 3 min walking intervals	Computer games control	not reported	not described, but supervised	Not clear	face-to-face	not clear	"supervised" but not clear by who	Segregated (only for ppl with disability)	not clear	no	no	no	no	3 X week for 8 weeks	75 minute per week		nr	nr	nr	nr	nr	n/a	n/a	n/a	n/a	P1: physical health P2: CV fitness M1: symptoms M2: QoL M3: depression
21	Marzolini 2009	Firth 2015	RCT/quasi-RCT	Community	Capacity	nr	nr	nr	nr	13	7	6	0	nr	PD	Schizophrenia/schizoaffective disorder	nr	m=45	nr	sport/physical activity	aerobic training/exercise or HIT	Aerobic resistance training	Group aerobics and weights training at a leisure centre. 10 min warm up, 20 min of resistance training, 60 min of aerobic training, 5 min cool-down	TAU	Community	Leisure centre	Group (>2 people)	face-to-face	not clear	"supervised" but not clear by who	Not clear	yes	not clear	no	no	no	2 X week for 12 weeks	1 hr 35 minutes per session		nr	leisure centre access	nr	nr	nr	n/a	n/a	n/a	n/a	P1: physical health P2: CV fitness M2: QoL/overall mental health M3: depression
21	Scheewe 2013a, 2013b, 2012	Firth 2015	RCT/quasi-RCT	Community	Capacity	nr	nr	nr	nr	63	31	32	13	nr	PD	Schizophrenia/schizoaffective disorder/schizophreniform disorder	nr	m=30	nr	sport/physical activity	aerobic training/exercise or HIT	Aerobic resistance training	Combined aerobic and resistance training. 40 min aerobic training plus 20 min resistance exercise	OT	not reported	not clear/described	Individual	face-to-face	not clear	"supervised" but not clear by who	Not clear	not clear	not clear	not clear	not clear	not clear	2 X week for 24 weeks	60 minutes per session		nr	nr	nr	nr	nr	n/a	n/a	n/a	n/a	P1: physical health P2: CV fitness M1: symptoms M2: QoL/overall mental health/need for care M3: depression M4: brain changes
21	Heggelund 2012	Firth 2015	NRCT	Community	Capacity	nr	nr	nr	nr	16	7	9	1	nr	PD	Schizophrenia/schizoaffective disorder/delusional disorder	nr	m=38	nr	sport/physical activity	strength training	Strength training	Maximal strength training. 5 min treadmill walking. Four sets of four repetitions in a leg press machine with 3 min breaks between each set	Computer games control	not reported	not described, but supervised	Not clear	face-to-face	not clear	"supervised" but not clear by who	Not clear	not clear	Not clear	no	no	no	3 X week for 8 weeks	<1hr per week		nr	gym equipment	nr	nr	nr	n/a	n/a	n/a	n/a	P1: physical health P2: CV fitness M1: symptoms M2: QoL
22	van Schijndel-Spreet 2014	Schepens 2018	Qualitative: other	Community	Participation	aged >=50 years	nr	nr	nr	40	40	0	nr	n/a	ID	mild-moderate ID	male and female (%nr)	50-80 years	Netherlands	sport/physical activity	physical activity/sports participation	physical activity/sports participation	not described - study explored facilitators and barriers to physical activity participation	no CG	not reported	not described	Not clear	face-to-face	not clear	not described	Not clear	not clear	not clear	not clear	not clear	not clear	nr	nr	see description	nr	nr	nr	nr	nr	n/a	n/a	Interpersonal relations	mixed effects	n/a
22	van Schijndel-Spreet 2017	Schepens 2018	RCT/quasi-RCT	Social	Participation	nr	nr	nr	nr	150	81	70	1 - not clear if IG or CG	1 - not clear if IG or CG	ID	mild, mod, sev ID	male and female (%nr)	44-83 years, m=58.2	Netherlands	sport/physical activity	physical activity/sports participation	physical activity/sports participation	a combined physical activity and physical health education program.	not described	not reported	not described	Not clear	face-to-face	not clear	not described	Not clear	not clear	not clear	not clear	not clear	not clear	nr	nr	see description	nr	nr	nr	nr	nr	n/a	n/a	interpersonal relations	positive impact	emotional wellbeing
22	Lante 2011	Bigby 2018, Bondar 2020	Case study (not multiple baseline)	Social and community	Capacity and participation	nr	nr	nr	nr	2	2	0	nr	n/a	ID	mild ID	50	21-22 years	nr	sport/physical activity	Convivial encounters: Individual support for physical activity in a mainstream gym	Creating a Sporting Chance Program	exercise, sports and active recreation within a community-based setting. The program included: 1. multiple sports (e.g. netball, cricket). Each sport incorporated skills training and participation in a competitive game. Modified rules and equipment support active inclusion. 2. exercise (e.g. low impact dance to music, weight training); 3. active recreation (e.g. walking and active games) designed…	no CG	Community	"community setting"	Not clear	face-to-face	not clear	not clearly described	Integrated (>=1 ppl without disability)	not clear	yes	not clear	not clear	not clear	3 semesters 2008-2009	nr		nr	mainstream gym access	nr	nr	nr	n/a	n/a	participation experiences	* Most enjoyable aspects: playing a new sport, social contact with others, impact on their health and fitness, gaining acknowledgement and social praise from others * Least enjoyable aspects: having to skip other activities * Both participants’ light activity ↓ in 2009 compared with 2008, moderate to vigorous-intensity PA levels and steps taken ↑ from 2008 From Bigby 2018: Qualitative data indica…	participation intensity of activity
22	Melville 2015, Matthews 2016 (same study)	Bondar 2020	RCT/quasi-RCT	Social and community	Capacity and participation	nr	nr	nr	nr	102	54	48	20 ltfu - group nr	nr	ID	mild, moderate and severe ID	51	30-54 years	nr	sport/physical activity	community-based walking intervention	Walk Well Programme	The Walk Well Programme: A walking advisor and participants developed an individualised programme to progressively increase baseline step counts, week on week. During the three PA consultations core behaviour change techniques were adopted: mobilising social support for change, developing self-efficacy, goal setting and self-monitoring, identifying and overcoming barriers to change and a motivati…	no training	Community	"community-based"	Not clear	face-to-face	not clear	"walking adviser"	Not clear	not clear	not clear	not clear	not clear	not clear	3 PA consultations with a walking advisor	nr		nr	nr	nr	nr	nr	n/a	n/a	n/a	n/a	1. QoL (EQ-5D VAS) 2. Self-efficacy (Self-Efficacy for Activity for Persons with ID) 3. Subjective vitality (adapted version of the Subjective Vitality Scale) 4. Steps per day (Actigraph GT3X accelerometers) 5. Total PA, moderate-vigorous PA and sedentary behaviours (International Physical Activity Questionnaire-Short version) 6. BMI and waist circumference
22	Bota 2014	Louw 2019	Mixed methods	Community	Participation	nr	nr	nr	nr	46	46	0	nr	n/a	ID	severity nr	nr	11-46 years	Romania	sport/physical activity	physical activity/sports participation	physical activity/sports participation	participating in a sports project that focused on social bonding, with age-matched peers from mainstream schools without a disability. The program involved group‐training sessions, attendance in educational sessions and scheduled competitions that were supervised by a physical education teacher	no CG	Community	not clearly described	Group (>2 people)	face-to-face	Teacher	PE teacher	Integrated (>=1 ppl without disability)	yes	yes	no	no	no	nr	nr	see description	nr	nr	nr	age-matched peers without disability	nr	n/a	n/a	social inclusion, self-concept self-esteem	Regular training and participation in sports competition leads to greater social inclusion, positive self‐concept and self‐esteem perception	n/a
23	Harada 2011	Bigby 2018	Descriptive/cross-sectional	Community	Participation	nr	nr	nr	nr	nr	nr	nr	nr	nr	ID	severity nr	nr	nr	nr	sport/physical activity	Segregated and integrated sports activities, and support to take part	Segregated and integrated sports activities, and support to take part	Description and comparison of examples of Special Olympics and Unified Sports programmes in different countries	no CG	Special Olympics	special olympics/unified sports	Group (>2 people)	face-to-face	not clear	not clearly described	Both integrated and segregated	yes	yes	no	no	no	nr	nr		nr	nr	nr	nr	nr	n/a	n/a	belonging	Three million individuals with intellectual disability in 180 countries participate in Special Olympics programmes and 150,000 people participate in Unified Sports in seven regions. no outcome data, provides a “chance to play sport… be a part of society... a platform for the development of social relationships."	n/a
23	Riggen 1993	Tint 2017, Hutzler 2010	NRCT	Community	Participation	IQ range 40–80: Segregated SO M = 57.6; Unified SO M = 53.3; Control M = 56.7	nr	nr	nr	75	25 segregated SO 25 Unified SO	31 controls w ID	nr	nr	ID	severity nr	100	m=25, m=28, m=31	USA	sport/physical activity	Segregated sports activities (or segregation not known), and support to take part; Special Olympics	Segregated and Unified Special Olympics	Unified (UnS) compared with segregated (S) SO, and sedentary controls (C). Basketball training period.	ppl w ID not participating in SO	Special Olympics	unified and segregated games	Group (>2 people)	face-to-face	not clear	special olympics staff?	Both integrated and segregated	yes	yes	not clear	not clear	not clear	nr	nr		nr	nr	nr	nr	nr	self-perception	* Increase in Social Self-Perception (self-acceptance) in Unified SO athletes, but not in traditional SO participants	n/a	n/a	* physical or general self worth; cardiovascular fitness * Basketball skill
23	Rosegard 2001 U	Tint 2017	Descriptive/cross-sectional	Community	Participation	nr	nr	nr	nr	80	80	0	nr	n/a	ID	severity nr	60	11-68 years	USA	sport/physical activity	Unified sports with non-disabled peers via Special Olympics	Special Olympics - Unified	Unified Sport initiative brings athletes with ID and typically developing partners of the approximate same age and athletic ability from the greater community together to play on the same sport teams.	no CG	Special Olympics	unified SO	Group (>2 people)	face-to-face	not clear	special olympics staff & participants	Integrated (>=1 ppl without disability)	yes	yes	not clear	not clear	not clear	nr	nr	nr	nr	nr	nr	nr	nr	maladaptive behaviour	Significant decreases in internal and external maladaptive behaviours were found for athletes in the active SO group after participating in a 12-week programme	n/a	n/a	n/a
23	McConkey 2013 U	Bigby 2018, Tint 2017	Qualitative: interviews	Community	Participation	nr	nr	nr	nr	5 SO participants 5-6 SO partners w/out ID 5 SO coaches 5-6 parents 4 SO teams 4-5 community representatives	5	0	nr	n/a	ID	severity nr	nr	nr	serbia, poland, ukraine, germany, hungary, Italy	sport/physical activity	Unified sports with non-disabled peers via Special Olympics	Special Olympics - Unified	Unified Sport initiative brings athletes with ID and typically developing partners of the approximate same age and athletic ability from the greater community together to play on the same sport teams.	no CG	Special Olympics	unified SO	Group (>2 people)	face-to-face	not clear	special olympics staff & participants	Integrated (>=1 ppl without disability)	yes	yes	not clear	not clear	not clear	nr	nr	nr	nr	nr	nr	nr	nr	n/a	n/a	friendships and community	Positive benefits of SO were indicated in the following themes: personal development of athletes, creation of inclusive friendships, increased positive perceptions of athletes and building alliances within local communities helping athletes with ID build alliances within local communities and increasing their access to community venues	n/a
23	Wilski 2012 U	Tint 2017	Qualitative: interviews	Community	Participation	nr	nr	nr	nr	221 SO participants w ID and partners w/out ID	221	0	nr	n/a	ID	severity nr	nr	12-25 years	Serbia, Poland, Hungary, Ukraine, Germany	sport/physical activity	Unified sports with non-disabled peers via Special Olympics	Special Olympics - Unified	Unified Sport initiative brings athletes with ID and typically developing partners of the approximate same age and athletic ability from the greater community together to play on the same sport teams.	no CG	Special Olympics	unified SO	Group (>2 people)	face-to-face	not clear	special olympics staff & participants	Integrated (>=1 ppl without disability)	yes	yes	not clear	not clear	not clear	nr	nr	nr	nr	nr	nr	nr	nr	communication ability	improved	access to community venues & friendships	Improved community venue access, and friendships were a central theme for all participants	skill/fitness
23	Hassan 2012 U	Tint 2017	Qualitative: interviews	Community	Participation	nr	nr	nr	nr	25 SO participants 28 partners w/out ID 25 coahces 4 parents 22 community representatives	25	0	nr	n/a	ID	severity nr	nr	12-25 years	Serbia, Poland, Hungary, Ukraine, Germany	sport/physical activity	Unified sports with non-disabled peers via Special Olympics	Special Olympics - Unified	Unified Sport initiative brings athletes with ID and typically developing partners of the approximate same age and athletic ability from the greater community together to play on the same sport teams.	no CG	Special Olympics	unified SO	Group (>2 people)	face-to-face	not clear	special olympics staff & participants	Integrated (>=1 ppl without disability)	yes	yes	not clear	not clear	not clear	nr	nr	nr	nr	nr	nr	nr	nr	n/a	n/a	social inclusion	Themes surrounding participation in US included feelings of social inclusion, fun and enjoyment, unique opportunities to travel and compete and financial challenges of participation	n/a
24	Carmeli 2002	Schepens 2018	RCT/quasi-RCT	Social	Participation	nr	nr	nr	nr	26	16	10	nr	nr	ID	down syndrome, living in foster home	male and female (%nr)	m=63	Israel	sport/physical activity	exercise program	exercise program	treadmill intervention	not described	not reported	? residential setting given they're institutionalised?	Not clear	face-to-face	not clear	not described	Segregated (only for ppl with disability)	yes	no	no	no	no	6 months	nr	see description	nr	treadmill	nr	nr	nr	n/a	n/a	Interpersonal relations	Positive impact	n/a
24	Carmeli 2004	Schepens 2018	NRCT	Social	Participation	nr	nr	nr	nr	27	14	13	nr	nr	ID	mild ID (not down syndrome)	male and female (%nr)	55-77 years	Israel	sport/physical activity	exercise program	exercise program	balance training program	muscle strengthening program	not reported	not described	Not clear	face-to-face	not clear	not described	Segregated (only for ppl with disability)	yes	no	no	no	no	6 months	nr	see description	nr	gym equipment?	nr	nr	nr	n/a	n/a	Interpersonal relations	Positive impact	n/a
24	Carmeli 2005	Schepens 2018	NRCT	Social	Participation	nr	nr	nr	nr	22	10	12	nr	nr	ID	mild ID requiring minimal ADL support (not down syndrome)	male and female (%nr)	54-66 years	Israel	sport/physical activity	exercise program	exercise program	physical training w focus on balance and muscle strength	not described	not reported	not described	Not clear	face-to-face	not clear	not described	Segregated (only for ppl with disability)	yes	no	no	no	no	nr	nr	see description	nr	gym equipment?	nr	nr	nr	n/a	n/a	Interpersonal relations	Positive impact	n/a
24	Carmeli 2008	Hutzler 2010, Schepens 2018	NRCT	Social	Participation	nr	nr	nr	nr	62	31	31	1	1	ID	mild ID requiring minimal ADL support (not down syndrome)	25.8065	47-67, m=56.5	Israel	sport/physical activity	exercise program	exercise program	physical training including warm up, large body movements promoting stretching, balance and strength training.	vocational training	Residential/home	not described	Group (>2 people)	face-to-face	not clear	not described	Segregated (only for ppl with disability)	yes	no	no	no	no	3 sessions per week for 10 months	40-45 minutes per session	see description	nr	gym equipment?	nr	nr	nr	n/a	n/a	Interpersonal relations	Positive impact	Self-perception of well-being Modified from Harter’s instrument Nottingham Health Profile (NHP) body mass index (BMI)
24	Tomporowski 1984	Bondar 2020	RCT/quasi-RCT	Social and community	Capacity and participation	nr	nr	nr	nr	65	22 - Physical Fitness gropu 21 Attention CG	22	nr	nr	ID	mod-sev ID	nr	m=29.4, m=28.9, m=28.9	nr	sport/physical activity	exercise program versus social social skills education program	Physical activity program	A typical training session consisted of 30 min of light callisthenics and flexibility exercises, 1 h of exercise in a small gymnasium equipped with a treadmill, stationary bicycles, a rowing machine and weight-lifting equipment and 1 h of walking or running outdoors. Recreational activities (e. g. bicycling and group games) were interspersed during the intervention phase. In addition, specific ex…	CG1: attention training: a special academic and social skills education programme; They received expressive and receptive language training and participated in group and individualised instruction. CG2: placebo tablets daily (12 daily)	not reported	not described	Group (>2 people)	face-to-face	not clear	not described	Not clear	not clear	not clear	not clear	not clear	not clear	5 days per week for 7 months	3 h per day		nr	nr	nr	nr	nr	n/a	n/a	Adaptive and maladaptive behaviour (Adaptive Behaviour Scale: Part I, transformed to threefactor scores: personal self-sufficiency, personal social responsibility and community self-sufficiency)	Significant correlation between social support and PA; physical fitness and PA, and between different constructs of social support	1. Adaptive and maladaptive behaviour (Adaptive Behaviour Scale: Part I, transformed to threefactor scores: personal self-sufficiency, personal social responsibility and community self-sufficiency) 2. Physical work capacity (Physical Fitness group with a treadmill test of cardiorespiratory endurance) 3. Resting 12-lead EKGs prior to and during the treadmill test and during recovery 4. EKG, HR and…
24	Tomporowski 1985	Bondar 2020	RCT/quasi-RCT	Social and community	Capacity and participation	nr	nr	nr	nr	50	25	25	nr	nr	ID	severe ID	nr	13-38 years	nr	sport/physical activity	exercise program versus social social skills education program	Physical activity program	systematic replication of Tomporowski and Ellis (1984). During the first 8 weeks, the intensity and duration of exercises was monitored and recorded daily; the intensity and/or duration of the exercise was gradually increased. Initially each group walked or jogged together with group leaders, a minimum of 20 min. Later, participants were paired and assigned to walk/jog specific distances. During …	Placebo tablets 3 X day	not reported	not described	Not clear	face-to-face	not clear	not described	Not clear	not clear	not clear	not clear	not clear	not clear	5 days per week for 7 months, total of 132 sessions	3 h per day		nr	nr	nr	nr	nr	n/a	n/a	n/a	n/a	1. Adaptive and maladaptive behaviour (Adaptive Behaviour Scale: Part I, transformed to threefactor scores: Personal Self- Sufficiency, Personal Social Responsibility and Community Self-Sufficiency) 2. Physical work capacity (IG only, treadmill test of cardiovascular endurance) 3. Resting 12-lead EKGs were recorded prior to and during the treadmill test and during recovery 4. EKG, HR and blood pr…
24	Perez-Cruzado 2016	Bondar 2020	NRCT-No control	Social and community	Capacity and participation	nr	nr	nr	nr	40	40	0	nr	n/a	ID	mild ID	85	m=35.9, 18-65 years	nr	sport/physical activity	multimodal physical activity and education intervention	multimodal physical activity and education intervention	PA sessions were planned to improve muscle strength, flexibility, balance and aerobic condition (four sessions each). All sessions started with 10-min warmup and ended with 10-min stretching. Tips were provided for going around town (e.g. ‘Park in the furthest space in the car park.’), for home (e.g. ‘Stand up and walk around during television commercials.’) and for family and friends (‘Plan acti…	no CG	not reported	not described	Not clear	face-to-face	not clear	not described	Not clear	not clear	not clear	not clear	not clear	not clear	2 X week for 8 weeks	1 hr per week		nr	nr	nr	nr	nr	n/a	n/a	Social support for activity in adults with ID (Physical Activity Self-efficacy and Social Support Scale for Persons with ID scale)	Significant ↑ in social support (professional support, family support, peers support)	1. QoL (WHO QoL-Disabilities Module) 2. Self-efficacy and social support for activity in adults with ID (Physical Activity Self-efficacy and Social Support Scale for Persons with ID scale) 3. Fitness measured with the Fun-Fitness programme test (Special Olympics) divided into four categories: strength, flexibility, balance and aerobic condition 4. PA (The International Physical Activity Questionn…
24	Heller 2004	Bondar 2020, Hutzler 2010	RCT/quasi-RCT	Social and community	Capacity and participation	mild to moderate ID	nr	nr	nr	89	32	21	36 ltfu - nr from which groups	nr	ID	mild-mod ID, Down Syndrome	67.4	m=39.7, 30-53 years	nr	sport/physical activity	Exercise and health group program: 30 to 35 min of cardiovascular exercise and 15 min of muscle strength and endurance during each session; teaching about using exercise equipment safely and how to inform staff of any unusual physical symptoms (weeks 1 and 2); reaching and maintaining prescribed training levels on various types of exercise equipment (weeks 3 and 4).	Exercise and health group program	exercise and health education program	no training/sedentary controls	not reported	not described	Not clear	face-to-face	not clear	not described	Segregated (only for ppl with disability)	not clear	not clear	not clear	not clear	not clear	3 X week for 12 weeks	1 hr per session		nr	nr	nr	nr	nr	n/a	n/a	Community integration (Community Integration Scale)	No significant difference between the groups in community integration	1. Performance self-efficacy - self efficacy to exercise regularly 2. Life satisfaction (Life Satisfaction Scale) 3. Depression (Children’s Depression Inventory) 4. Adaptive behaviour (Instrumental Activities of Daily Activities; Activities of Daily Living scales) 5. Cognitive-emotional barriers (Cognitive-Emotional Barriers to Exercise Scale) 6. Outcome expectations (Exercise Perceptions Scale)
24	Marks 2013	Bondar 2020	RCT/quasi-RCT	Social and community	Capacity and participation	nr	nr	nr	90	67	32	35	nr	nr	ID	mild-mod ID	47.8	m=45.2, 30-64 years	nr	sport/physical activity	health education program in community based setting. * PA component: customised exercise modalities varied according to participant’s preferences and staff resources. Sessions were built of exercise of choice for the following specified amount of time: warm-up (stretches) – 5 min; aerobic activity – 30 min; muscle strength and endurance – 20 min; and cool down (stretches) – 5 min	health education program in community based setting	community based organisation health education program	lag (no intervention)	Community	"community based organisation"	Not clear	face-to-face	not clear	not described	Segregated (only for ppl with disability)	not clear	not clear	not clear	not clear	not clear	3 X week for 12 weeks	1 hr per session		nr	nr	34 staff in community based organisations participated in an 8-hour workshop (Train-the-Trainer model)	nr	nr	n/a	n/a	see psychosocial health outcomes	n/a	Psychosocial health status five scales: 1. Perceived General Health Status (4-point rating scale); 2. Pain; Social/Environmental supports for exercise (five items Support for Exercise Scale); 3. Adapted social/environmental supports for nutrition (four items Nutrition Scale); 4. Perceived Health Behaviours (five-item scale) Other: 5. Self-efficacy to exercise (Self-Efficacy to Exercise Scale) 6. …
24	Elliott 1994	Hallett 2019	NRCT-No control	Social and community	Capacity	nr	nr	nr	nr	6	6	0	nr	n/a	ASD	severity nr	nr	nr	nr	sport/physical activity	exercise program	exercise program	not described further	no CG	not reported	not described	Not clear	face-to-face	not clear	not described	Segregated (only for ppl with disability)	yes	no	no	no	no	nr	nr	nr	nr	nr	nr	nr	nr	maladaptive behaviour	Improvement in ‘‘maladaptive and stereotypic behaviors’’ after vigorous exercise. No significant findings for motor training.	n/a	effect for each participation measure/outcome between groups or within groups only if no b/n groups test	employment
24	Garcia-Villamisar 2010	Hallett 2019; Tobin 2014	RCT/quasi-RCT	Social and community	Participation	nr	nr	nr	nr	71	37	34	nr	nr	ASD	severity nr	nr	nr	nr	sport/physical activity	leisure program	leisure program	leisure program designed to facilitate participation in recreation activities, many of which were social in nature, for a group of adults with ASD who participated in a day program	waitlist CG	Disability activity setting (e.g., day centre)	day program	Group (>2 people)	face-to-face	not clear	not described	Segregated (only for ppl with disability)	yes	yes	no	no	no	5 days a week for one year	2 hours per day	nr	nr	nr	nr	nr	nr	n/a	n/a	community belonging	no significant improvement on the social/integration subscale of the QoL Questionnaire.	QoL.Q, Spanishversion Stress Survey Schedule (Self- andproxy-report) Leiter Scale
24	Palmen 2011	Lorenc 2018	NRCT	Social and community	Capacity and participation	nr	nr	nr	nr	12	nr	nr	nr	nr	ASD	ASD without I D	83	m=21	Netherlands	sport/physical activity	leisure program	leisure program	leisure program including homework, skill development, behavioural practice and feedback	no intervention	not reported	not described	Not clear	not clear	not clear	not described	Not clear	not clear	not clear	not clear	not clear	not clear	nr	nr	see description	nr	nr	nr	nr	nr	n/a	n/a	Need for leisure support Engagement in leisure activities Satisfaction with leisure lifestyle	Hedges G= 0.58 (−0.60, 1.76)ns Hedges G= 0.32 (−0.84, 1.48)ns Hedges G= 0.64 (−0.55, 1.83)ns	n/a
25	Lynnes 2009	Bondar 2020	Case study (not multiple baseline)	Social and community	Capacity and participation	nr	nr	nr	nr	4	4	0	nr	n/a	ID	severity nr	25	25-38 years	Canada	sport/physical activity	Special Olympics participation	Special Olympics training	Each face-to-face session was divided into: aerobic exercise to music (~10–15 min), strength training using resistance bands (~30 min; e.g. biceps curl, triceps extensions, side leg raises), a recreational game (e.g. floor hockey and bowling) (~20–30 min), a cool down (~10 min) and planning exercise for the week (~10 min). The aerobic warm-up and the resistance band exercises were replicated in a…	no CG	Special Olympics	not clear	Not clear	face-to-face	not clear	not described	Segregated (only for ppl with disability)	not clear	no	no	no	no	3 sessions per week (2 were home-based) for 10 weeks	1.5 hr per session		nr	nr	nr	nr	nr	n/a	n/a	n/a	n/a	1. Self-efficacy towards exercise (self-efficacy questionnaire for ID adults) 2. Support needs (Supports Intensity Scale) 3. Programme satisfaction via guided interview 4. Checklist for determining skill acquisition 5. Adherence to the programme
25	Tedrick 2009	Bigby 2018, Tint 2017	Qualitative: interviews	Community	Participation	SO participants	nr	nr	nr	3	3	0	nr	n/a	ID	severity nr	66.7	30-50 years	USA	sport/physical activity	Segregated sports activities (or segregation not known), and support to take part; Special Olympics	Special Olympics	not further described	no CG	Special Olympics	not described further	Group (>2 people)	face-to-face	not clear	not described	Segregated (only for ppl with disability)	not clear	no	no	no	no	nr	nr		nr	nr	nr	nr	nr	n/a	n/a	Friendships	Benefits of SO included friendships From Bigby 2018: Participants met a lot of others through Special Olympics. Some had formed friendships with other participants, acted as mentors.	fitness, skills and competition
25	Glidden 2011 T	Tint 2017	Descriptive/cross-sectional	Community	Capacity and participation	SO participants	nr	nr	nr	34 SO participants w ID 29 parents of SO participants	34	0	nr	n/a	ID	severity nr	67.6471	12-49 years	USA	sport/physical activity	Segregated sports activities (or segregation not known), and support to take part; Special Olympics	Special Olympics - traditional (segregated)	Traditional SO sports allow individuals with ID to participate in sport training along with regional, national and international competitions in more than 30 Olympic-style individual and team-based sports.	no CG	Special Olympics	traditional SO	Not clear	face-to-face	not clear	not described	Segregated (only for ppl with disability)	not clear	no	no	no	no	nr	nr		nr	nr	nr	nr	nr	n/a	n/a	benefits of participating	Parents reported positive impact of SO on participants’ social, self-perception, participation, physical, benefits.	happiness
25	Valkova 1996 T	Tint 2017	Descriptive/cross-sectional	Community	Participation	SO participants and CG w ID	nr	nr	nr	39	nr	nr	nr	nr	ID	severity nr	error in SR? n=39, but 44 male	14-44 years	Czech Republic	sport/physical activity	Segregated sports activities (or segregation not known), and support to take part; Special Olympics	Special Olympics - traditional (segregated)	Traditional SO sports allow individuals with ID to participate in sport training along with regional, national and international competitions in more than 30 Olympic-style individual and team-based sports.	physically inactive individuals w ID	Special Olympics	traditional SO	Group (>2 people)	face-to-face	not clear	special olympics staff & participants?	Segregated (only for ppl with disability)	yes	no	no	no	no	nr	nr		nr	nr	nr	nr	nr	verbal communication	better in SO participants than controls	social behaviour; adaptive maladaptive behaviour	higher scores on all indices of social behaviour and adaptive and maladaptive behaviour	physical condition; behaviour; flexibility; memory
25	Valkova 1998 T	Tint 2017	Descriptive/cross-sectional	Community	Participation	SO participants and CG w ID	nr	nr	nr	37	nr	nr	nr	nr	ID	severity nr	sex nr	m=25	Czech Republic	sport/physical activity	Segregated sports activities (or segregation not known), and support to take part; Special Olympics	Special Olympics - traditional (segregated)	Traditional SO sports allow individuals with ID to participate in sport training along with regional, national and international competitions in more than 30 Olympic-style individual and team-based sports.	physically inactive individuals w ID	Special Olympics	traditional SO	Group (>2 people)	face-to-face	not clear	special olympics staff & participants?	Segregated (only for ppl with disability)	yes	no	no	no	no	nr	nr		nr	nr	nr	nr	nr	n/a	n/a	social behaviour	SO group showed greater improvement in social behaviour indices than the non-SO group	physical condition
25	Werner 2015 T	Tint 2017	Qualitative: interviews	Community	Participation	nr	nr	nr	nr	8 SO participants 12 parents 6 siblings	8	0	nr	n/a	ID	severity nr	37.5	m=21	Israel	sport/physical activity	Segregated sports activities (or segregation not known), and support to take part; Special Olympics	Special Olympics - traditional (segregated)	Traditional SO sports allow individuals with ID to participate in sport training along with regional, national and international competitions in more than 30 Olympic-style individual and team-based sports.		Special Olympics	traditional SO	Group (>2 people)	face-to-face	not clear	special olympics staff & participants?	Segregated (only for ppl with disability)	yes	no	no	no	no	nr	nr		nr	nr	nr	nr	nr	n/a	n/a	participation experiences	Four themes were present: (1) the World Games’ role in fostering the athletes’ self-identity, (2) the World Games’ positive impact on family quality of life, (3) the World Games’ positive impact on siblings and (4) the World Games’ impact on improving community awareness and inclusion	n/a
25	Marks 2010	Tint 2017	Case study (not multiple baseline)	Community	Participation	nr	nr	nr	nr	56 SO participants 54 coaches and caregivers	56	0	nr	n/a	ID	severity nr	46.4286	m=32	USA	sport/physical activity	Segregated sports activities (or segregation not known), and support to take part; Special Olympics	Special Olympics - Health promotion projects	participation in various Health Promotion Projects for 6 to 12 weeks	no CG	Special Olympics	health promotion programs attached to the SO	Not clear	face-to-face	not clear	special olympics staff & participants?	Segregated (only for ppl with disability)	yes	no	no	no	no	nr	nr		nr	nr	nr	nr	nr	n/a	n/a	friendships	SO participants reported an increase in number of friends	health behaviour and health indicators
26	Farrell 2004	Tint 2017, Hutzler 2010	Qualitative: interviews	Community	Participation	Special Olympics participants; IQ < 70	nr	nr	nr	38	38	0	nr	n/a	ID	severity nr	55.2632	m=32.7	Canada	sport/physical activity	Segregated sports activities (or segregation not known), and support to take part; Special Olympics	Special Olympics	not further described	no CG	Special Olympics	not described further	Group (>2 people)	face-to-face	not clear	special olympics staff & participants	Not clear	yes	not clear	not clear	not clear	not clear	nr	nr		nr	nr	nr	nr	nr	n/a	n/a	1. reasons for participating 2. dislikes 3. social support	1. Making new friends, competition, coaches/ volunteers; fun; 2. conflicts, disorganised rules and polices; 3. mainly from family and friends From Tint: * Themes regarding positive outcomes of SO participation included positive feedback, choice, learning skills, demonstrating ability, friendships, social approval and enjoyment. * Negative outcomes included conflict with other athletes, coaches, n…	n/a
26	Ghasemia 2012	Tint 2017	Descriptive/cross-sectional	Community	Participation	nr	nr	nr	nr	76	76	0	nr	n/a	ID	severity nr	59.2105	m=22-24	Iran	sport/physical activity	Segregated sports activities (or segregation not known), and support to take part; Special Olympics	Special Olympics	not further described	no CG	Special Olympics	not described further	Group (>2 people)	face-to-face	not clear	special olympics staff & participants	Not clear	yes	not clear	not clear	not clear	not clear	nr	nr		nr	nr	nr	nr	nr	n/a	n/a	self-efficacy; interpersonal dependency	SO participants reported significantly higher scores than the non-SO athletes in all sub-scales of self-efficacy and interpersonal dependency after 9 months of SO participation	n/a
26	Goodwin 2006	Tint 2017	Qualitative: interviews	Community	Participation	nr	nr	nr	nr	18 parents of SO participants	18	0	nr	n/a	ID	severity nr	88.8889	39-69 years	Canada	sport/physical activity	Segregated sports activities (or segregation not known), and support to take part; Special Olympics	Special Olympics	not further described	no CG	Special Olympics	not described further	Group (>2 people)	face-to-face	not clear	special olympics staff & participants	Not clear	yes	not clear	not clear	not clear	not clear	nr	nr		nr	nr	nr	nr	nr	n/a	n/a	social acceptance	* Benefit SO included opportunities to realise success, development of independence and feelings of social acceptance.	negative xperiecnes
26	Harada 2009	Tint 2017, Hutzler 2010	Descriptive/cross-sectional	Community	Participation	Special olympics participants and their families	nr	nr	nr	1307: 579 athletes	579	0	nr	n/a	ID	severity nr	64	Median=25	USA	sport/physical activity	Segregated sports activities (or segregation not known), and support to take part; Special Olympics	Special Olympics	not further described	no CG	Special Olympics	not described further	Group (>2 people)	face-to-face	not clear	special olympics staff & participants	Not clear	yes	not clear	not clear	not clear	not clear	nr	nr		nr	nr	nr	nr	nr	n/a	n/a	motivations and reasons for leaving	* Fun (54%) and social interaction (21%) are the main motivation factors to participate in SO. * Change of interest (38%) and programme unavailability (33%) main reasons to leave	n/a
26	Weiss 2003	Tint 2017	Descriptive/cross-sectional	Community	Participation	nr	nr	nr	nr	97	97	0	nr	n/a	ID	severity nr	65.9794	9-43 years	Canada	sport/physical activity	Segregated sports activities (or segregation not known), and support to take part; Special Olympics	Special Olympics	not further described	no CG	Special Olympics	not described further	Group (>2 people)	face-to-face	not clear	special olympics staff & participants	Not clear	yes	not clear	not clear	not clear	not clear	nr	nr		nr	nr	nr	nr	nr	n/a	n/a	social acceptance	* Only the number of medals was a significant predictor of social acceptance.	self-concept
26	Weiss 2008	Tint 2017	Case study (not multiple baseline)	Community	Participation	nr	nr	nr	nr	49	49	0	nr	n/a	ID	severity nr	61.2245	17-45 years	Canada	sport/physical activity	Segregated sports activities (or segregation not known), and support to take part; Special Olympics	Special Olympics	not further described	no CG	Special Olympics	not described further	Group (>2 people)	face-to-face	not clear	special olympics staff & participants	Not clear	yes	not clear	not clear	not clear	not clear	nr	nr		nr	nr	nr	nr	nr	n/a	n/a	social acceptance	Changes in involvement in SO predicted perceived physical competence and general self-worth over a 42-month period; however, it was not a significant predictor of social acceptance	n/a
26	Wilhite 1992	Tint 2017	Descriptive/cross-sectional	Community	Participation	nr	nr	nr	nr	145	145	0	nr	n/a	ID	severity nr	47.5862	19-28 years	USA	sport/physical activity	Segregated sports activities (or segregation not known), and support to take part; Special Olympics	Special Olympics	not further described	no CG	Special Olympics	not described further	Group (>2 people)	face-to-face	not clear	special olympics staff & participants	Not clear	yes	not clear	not clear	not clear	not clear	nr	nr		nr	nr	nr	nr	nr	n/a	n/a	community involvement	SO participants with moderate to severe ID showed a positive association between sport involvement and community involvement (e.g. increased independence in the community), while athletes with mild to moderate ID showed a somewhat negative association.	n/a
26	Shapiro 2003	Hutzler 2010	Descriptive/cross-sectional	Community	Participation	SO participants	nr	nr	nr	147	147	0	nr	n/a	ID	severity nr	54.4218	Median=32.8-34.2 (Male-Female); 21-70 years	USA	sport/physical activity	Segregated sports activities (or segregation not known), and support to take part; Special Olympics	Special Olympics	not further described	no CG	Special Olympics	not described further	Group (>2 people)	face-to-face	not clear	special olympics staff & participants	Not clear	yes	not clear	not clear	not clear	not clear	nr	nr		nr	nr	nr	nr	nr	n/a	n/a	correlates of sport motivation	No general gender, age and race effects on sport motivation were found. Task oriented and social integrative motives appeared stronger than ego oriented correlates of activity	n/a
26	Dykens 1996	Hutzler 2010	Descriptive/cross-sectional	Community	Capacity and participation	USA SO team members	nr	nr	nr	104	104	0	nr	n/a	ID	SO Median IQ range = 40–78, Median = 59; Non athletes Median IQ = 51	51.9231	Median=22	USA	sport/physical activity	Segregated sports activities (or segregation not known), and support to take part; Special Olympics	Special Olympics	not further described	no CG	Special Olympics	not described further	Group (>2 people)	face-to-face	not clear	special olympics staff & participants	Not clear	yes	not clear	not clear	not clear	not clear	nr	nr		nr	nr	nr	nr	nr	social competence "concern with winning"	* Length of time in SO strongest predictor of social competence. * SO athletes had higher social competence scores and more positive self-perception than non-athlete controls * Significant increase in self-competence/perception achievement post games; * decline post-games concerns with winning (ns)	n/a	n/a	n/a
26	Frey 2005	Hutzler 2010	Qualitative: other	Community	Participation	Mild SO athletes	nr	nr	nr	12	12	0	nr	n/a	ID	mild ID?	70	m=37	nr	sport/physical activity	Segregated sports activities (or segregation not known), and support to take part; Special Olympics	Special Olympics	not further described	no CG	Special Olympics	not described further	Group (>2 people)	face-to-face	not clear	special olympics staff & participants	Not clear	yes	not clear	not clear	not clear	not clear	nr	nr		nr	nr	nr	nr	nr	n/a	n/a	barriers to participation	Perceived barriers; lack of guidance; negative supports; mostly sedentary leisure-time choices; perceived benefits similar to those of non-disabled	n/a
27	Bellack 2004 - 62	Morin 2017	Systematic review	Social	Capacity	nr	nr	nr	nr	4 meta-analyses	nr	nr	nr	nr	PD	Schizophrenia/schizoaffective disorders	n/a	n/a	n/a	social skills/ communication training	Social skills training for schizophrenia (SRs and meta-analyses)	social skills training	not described further	nr	not reported	not described	Not clear	not clear	not clear	not described	Not clear	not clear	not clear	not clear	not clear	not clear	nr	nr		nr	nr	nr	nr	nr	social skills	reviewed four meta-analyses of skills training and concluded that social skills training has a significant effect on behavioral skills, social role functioning, and client satisfaction but not on symptom reduction and relapse	n/a	n/a	n/a
27	Pilling 2002 - 63	Morin 2017	Systematic review	Social	Capacity	nr	nr	nr	nr	9 meta-analyses	nr	nr	nr	nr	PD	Schizophrenia/schizoaffective disorders	n/a	n/a	n/a	social skills/ communication training	Social skills training for schizophrenia (SRs and meta-analyses)	social skills training	not described further	nr	not reported	not described	Not clear	not clear	not clear	not described	Not clear	not clear	not clear	not clear	not clear	not clear	nr	nr		nr	nr	nr	nr	nr	social skills	"Pilling et al. conducted a meta-analysis of nine RCTs on social skills training and concluded that there was little evidence of benefit in any outcomes"	n/a	n/a	n/a
27	Mueser 2004 - 64	Morin 2017	Systematic review	Social	Capacity	nr	nr	nr	nr	nr	nr	nr	nr	nr	PD	Schizophrenia/schizoaffective disorders	n/a	n/a	n/a	social skills/ communication training	Social skills training for schizophrenia (SRs and meta-analyses)	social skills training	not described further	nr	not reported	not described	Not clear	not clear	not clear	not described	Not clear	not clear	not clear	not clear	not clear	not clear	nr	nr		nr	nr	nr	nr	nr	social skills	patients with schizophrenia can learn a variety of skills (conversational, interpersonal problem-solving strategies, etc.) and that acquired skills are usually still present after 2 years (the maximum duration of the studies) (61-64)	n/a	n/a	n/a
27	Pfammatter 2006 - 65	Morin 2017	Systematic review	Social	Capacity	nr	nr	nr	nr	19 meta-analyses	nr	nr	nr	nr	PD	Schizophrenia/schizoaffective disorders	n/a	n/a	n/a	social skills/ communication training	Social skills training for schizophrenia (SRs and meta-analyses)	social skills training	not described further	nr	not reported	not described	Not clear	not clear	not clear	not described	Not clear	not clear	not clear	not clear	not clear	not clear	nr	nr		nr	nr	nr	nr	nr	social skills	19 controlled trials and found positive effects on social skills acquisition (ES = 0.77)	social functioning	Positive effects on social functioning (ES = 0.39).	relapse
27	Kurtz 2008 - 66	Morin 2017	Systematic review	Social	Capacity	nr	nr	nr	nr	22 meta-analyses, 1521 patients	nr	nr	nr	nr	PD	Schizophrenia/schizoaffective disorders	n/a	n/a	n/a	social skills/ communication training	Social skills training for schizophrenia (SRs and meta-analyses)	social skills training	not described further	nr	not reported	not described	Not clear	not clear	not clear	not described	Not clear	not clear	not clear	not clear	not clear	not clear	nr	nr		nr	nr	nr	nr	nr	n/a	n/a	social functioning	moderate but significant improvement in social functioning (ES = 0.52), sustained at follow up	negative symptoms hospitalisation
27	Elis 2013 - 67	Morin 2017	Systematic review	Social	Capacity	nr	nr	nr	nr	5 meta-analyses	nr	nr	nr	nr	PD	Schizophrenia/schizoaffective disorders	n/a	n/a	n/a	social skills/ communication training	Social skills training for schizophrenia (SRs and meta-analyses)	social skills training	not described further	nr	not reported	not described	Not clear	not clear	not clear	not described	Not clear	not clear	not clear	not clear	not clear	not clear	nr	nr		nr	nr	nr	nr	nr	n/a	n/a	n/a	n/a	negative symptoms
27	Aleman 2016 - 68	Morin 2017	Systematic review	Social	Capacity	nr	nr	nr	nr	5 meta-analyses	nr	nr	nr	nr	PD	Schizophrenia/schizoaffective disorders	n/a	n/a	n/a	social skills/ communication training	Social skills training for schizophrenia (SRs and meta-analyses)	social skills training	not described further	nr	not reported	not described	Not clear	not clear	not clear	not described	Not clear	not clear	not clear	not clear	not clear	not clear	nr	nr		nr	nr	nr	nr	nr	n/a	n/a	n/a	n/a	negative symptoms
27	Kayser 2006	Grant 2017	RCT/quasi-RCT	Social	Capacity	outpatients	nr	nr	nr	14	8	6	n/a	n/a	PD	schizophrenia	70.2857	m=32.4, m=38.2	nr	social skills/ communication training	social interaction training, incl ToM	social interaction training, incl ToM	not described	TAU	Clinical - outpatient	not described	Not clear	not clear	not clear	not clearly described	Segregated (only for ppl with disability)	not clear	not clear	not clear	not clear	not clear	2 sessions	1 hour per session	video clips showing social interactions with training in ToM	nr	nr	nr	nr	nr	theory of mind	positive effects (stats nr)	n/a	n/a	n/a
27	Hayes 1995	Puolakka 2019	RCT/quasi-RCT	Social	Quality of Life	Schizophrenia, age 18-65, showed social skills deficits and poor community-functioning	nr	nr	nr	63	nr	nr	nr	nr	PD	Schizophrenia	74.6	m=36	Australia	social skills/ communication training	Social Skills Training	Social Skills Training	SST + TAU. The SST group sessions contained training interpersonal skills, social problem solving, positive time-use skills and the use of generalization enhancement techniques.	Discussion group + TAU: DG groups focused on the topics of interpersonal relations and purposeful use of time but the therapists did not teach or overtly demonstrate social skills.	Clinical - outpatient	n/a	Group (>2 people)	face-to-face	not clear	not clearly reported	Segregated (only for ppl with disability)	yes	no	no	no	no	36 (sessions over 18 week period), 9 booster sessions over 6m period	75m per session	training interpersonal skills, social problem solving, positive time-use skills and the use of generalization enhancement techniques	nr	nr	nr	nr	nr	n/a	n/a	n/a	n/a	Quality of Life Scale
27	Rus-Calafell 2012	Fernandez-Sotos 2020	NRCT-No control	Social	Capacity	nr	nr	nr	nr	1	1	0	0	n/a	PD	schizophrenia	nr	nr	nr	social skills/ communication training	Soskitrain: Social skills training	Soskitrain: Social skills training	a social skills training aimed at every-day situations, such as going to the supermarket, dealing with an angry security guard in a museum or trying to negotiate with a friendly manipulator about who would drive a car to a party. The program consists of two phases. In the first phase, the difficulties of facial recognition of emotions and the processing of social information are addressed. The se…	no CG	Clinical - in/outpatient not clear	not described	Individual	face-to-face	not clear	not clearly reported	Segregated (only for ppl with disability)	no	no	no	no	no	16 sessions, twice a week for 8 weeks	1 hr per session	see description	nr	computer/VR	nr	nr	nr	Social anxiety:SADS Social performance and anxiety:AI	Improvement in facial emotion recognition, social anxiety, conversation time, interpersonal communication, assertiveness (stats nr)	Social functioning:SFS	? nr	Psychopathology:PANSS
27	Rus-Calafell 2013	Puolakka 2019	RCT/quasi-RCT	Social	Quality of Life	Schizophrenia, Age 18-55	nr	nr	nr	31	13	18	nr	nr	PD	Schizophrenia	80.6	m=42.4, m=37.5	Spain	social skills/ communication training	Soskitrain: Social skills training	Soskitrain: Social skills training	a brief cognitive-behavioural SST + TAU, where the SST links treatment to seven specific target behaviours: social perception, social information processing, responding and sending skills, affiliative skills, interactional skills, and behaviour governed by social norm	TAU including outpatient services, such as case management, medication adherence, psy_x0002_chotherapy, leisure engagement and family support	Clinical - outpatient	Mental health outpatient service of a general hospital	Group (>2 people)	face-to-face	not clear	not clearly reported	Segregated (only for ppl with disability)	yes	no	no	no	no	32 (2 sessions each week for 16 weeks)	nr	SST linked to social perception, social information processing, responding and sending skills, affiliative skills, interactional skills, and behaviour governed by social norm	nr	nr	nr	nr	nr	n/a	n/a	n/a	n/a	SF-36 physical health, mental health scores
27	Rus-Calafell 2014	Fernandez-Sotos 2020	NRCT-No control	Social	Capacity	nr	nr	nr	nr	12	12	0	nr	n/a	PD	schizophrenia or schizoaffective disorder	nr	nr	nr	social skills/ communication training	Soskitrain: Social skills training	Soskitrain: Social skills training	as per 2012 paper	no CG	Clinical - in/outpatient not clear	not described	Individual	face-to-face	not clear	not clearly reported	Segregated (only for ppl with disability)	no	no	no	no	no	16 sessions, twice a week for 8 weeks	1 hr per session	see description	nr	computer/VR	nr	nr	nr	Social performance and anxiety:AI, SSIT, SADS	improvement in social skills maintained at FU (stats nr)	Social functioning:SFS	? nr	Psychopathology:PANSS
27	Marzillier 1976	Ma 2020	RCT/quasi-RCT	Social	Participation	adults w personality disorder or neurosis	nr	nr	nr	21	nr	nr	nr	nr	PD	personality disorder or neurosis	nr	17-43 years	UK	social skills/ communication training	Social Skill Training / Systematic Desensitisation	IG1: Systematic Desensitisation (SD) IG2: Social Skills Training (SST)	Systematic desensitisation: included relaxation training and hierarchy construction, practice in both imagination and reality Social skills training: combined elements of both assertive and social skills training, included role playing, modelling, and practice in real-life and with volunteers	waitlist	Clinical - in/outpatient not clear	The Maudsley Hospital, UK	Individual	face-to-face	Clinician	The therapist was a trained clinical psychologist with experience in behavioural treatments	Segregated (only for ppl with disability)	no	no	no	no	no	15 sessions (usually once a week, ubt sometimes twice a week) over 3 months	45 minutes per session	see description	nr	nr	nr	clinical psychologist	nr	n/a	n/a	Revised-Social Diary and Standardised Interview Schedule	No between-group difference between SST and SD in social activities and social contacts (p > 0.05) SST had a greater improvement in the range of social activities (F (1,18) = 7.56, p < 0.025) and social contacts (F (1,18) = 9.47, p < 0.0.01) than the waiting-list group SD had a greater increase in social contacts than the waiting-list group (F (1,18) = 12.46, p < 0.001) measured at end of treatme…	(1) Anxiety disorders (2) Mental state (3) Personality assessment
27	Adery 2018	Fernandez-Sotos 2020	NRCT-No control	Social	Capacity	nr	nr	nr	nr	16	16	0	nr	n/a	PD	schizophrenia	nr	nr	nr	social skills/ communication training	MASI-VR: Multimodal adaptive social intervention in Virtual Reality	Multimodal adaptive social intervention in Virtual Reality (MASI-VR)	a program that includes the training of nonverbal social skills such as eye contact, facial expression, social distance and more complex skills including how to start conversations, greet people and ask for help or information. For this, the therapy includes avatars in non_x0002_immersive VR in three different social contexts (bus stop, shop and cafeteria).	no CG	Clinical - in/outpatient not clear	not described	Individual	face-to-face	not clear	not described	Segregated (only for ppl with disability)	no	no	no	no	no	10 sessions (approx 2 X week)	nr	see description	nr	computer/VR	nr	nr	nr	n/a	n/a	Social functioning:SFS	nr	Severity of general psychiatric symptoms:BPRS Severity of positive and negative psychotic symptoms:SAPS, SANS
27	Park 2011	Fernandez-Sotos 2020	RCT/quasi-RCT	Social	Capacity	nr	nr	nr	nr	64	33	31	nr	nr	PD	Schizophrenia	nr	nr	nr	social skills/ communication training	SST-VR: Social skills training with virtual reality role-plays	SST-VR: Social skills training with virtual reality role-plays	three consecutive workouts: five training sessions on conversation skills (¨introduce yourself¨, ¨find a common concern and listen to the other person¨, ¨start a conversation¨, ¨hold a conversation¨and¨ end a conversation¨), three training sessions on assertiveness skills (¨make a demand¨, ¨reject a demand from another person¨and¨make a commitment¨), and two training sessions on emotional express…	SST-TR (same as the IG except not with VR?)	Clinical - in/outpatient not clear	not described	Group (>2 people)	face-to-face	not clear	not clearly reported	Segregated (only for ppl with disability)	yes	no	no	no	no	10 sessions	nr	see description	nr	computer/VR	nr	nr	nr	Social skills:SBS, RAS, RCS, SPSI-R Blinded assessors rated vocal, non-verbal and conversational skills	the SST-VR group showed greater engagement with the training and generalisation of skills. After the training, the SST-VR group improved more in assertiveness and conversational skills,but less in non-verbal skills (stats nr)	n/a	n/a	Psychopathology:PANSS
27	Bjorkman 2002	Ma 2020	RCT/quasi-RCT	Social	Participation	adults w SMI	nr	nr	nr	77	nr	nr	nr	nr	PD	SMI	nr	19-51 years	Sweden	social skills/ communication training	Social skills training	Social skills training via case management service	The case management service: moderately focused on skills training, strong emphasis on consumer input	TAU	Clinical - outpatient	Case management service in Sweden (secondary care setting)	Individual	face-to-face	Clinician	All staff had experiences in working in social services, psychiatric services or vocational rehabilitation. The team consisted of two registered nurses and two social workers. Supervision was done by a psychiatrist and a psychologist	Segregated (only for ppl with disability)	no	no	no	no	no	18 months	1.45 per week	see description	nr	nr	nr	not described	nr	n/a	n/a	Subjective social isolation outcome: the abbreviated version of the Interview Schedule for Social Interaction (ISSI)	measured at 18 and 36m fu	psychiatric symptoms; quality of life; use of psychiatric services
27	Hasson-Ohayon 2007 #42	Ma 2020	RCT/quasi-RCT	Social	Participation	adults with severe mental illness	nr	nr	nr	210	nr	nr	nr	nr	PD	SMI	nr	nr	Israel	social skills/ communication training	Psychoeducation, social skills training	Psychoeducation, social skills training	Illness Management and Recovery Programme is a standarised curriculum-based programme, which provides essential information and skills to people with severe mental illness. The information and skills provided are designed to help patients manage their illness and work towards their personal recovery goals. In this study, educational handouts in Hebrew were provided to participants, focused primar…	TAU	Clinical - in/outpatient not clear	Psychiatric community rehabilitation centre	Group (>2 people)	face-to-face	Clinician	Interventions were led by two clinicians, one of whom had weekly training sessions. For the first 8 months of intervention, clinicians attended monthly supervision sessions	Segregated (only for ppl with disability)	yes	no	no	no	no	weekly sessions for 8m	1hr per session	see description	nr	hand outs	nr	nr	nr	n/a	n/a	Subjective social isolation outcome: the Multidimensional Scale of Perceived Social Support (MSPSS)	No significant changes in perceived social support for either group. p > 0.05 (end of treatment and 8m fu)	personal recovery
27	Aberg-Wistedt 1995	Ma 2020	RCT/quasi-RCT	Social	Participation	adults with schizophrenia or long-term psychotic disorder	nr	nr	nr	40	nr	nr	nr	nr	PD	schizophrenia or long-term psychotic disorder	nr	nr	Sweden	social skills/ communication training	Psychoeducation/social skills training	Psychoeducation/social skills training w family psychoeducation	Intervention group: (1) The team provided assertive outreach; patients received skill training and instruction in critical life task (2) Specific services also provided based on individual needs and assessments (3) Family psychoeducation and support	TAU	Clinical - outpatient	The Kungsholmen sector, Stockholm, Sweden	Individual	face-to-face	Clinician	The team consisted of a psychologist/psychiatrist, a psychiatric social worker, a social service officer, and a psychiatric nurse/nurse assistant	Segregated (only for ppl with disability)	no	no	no	no	no	1 individual session every second week for 2 years Crisis services were available 24/7	1 hr for individual meetings (4 hrs per week with psychiatric nurse/nurse assistant - not clear if this is the total time they had to meet all patients, or if every patient had this 4 hour session every week?)	see description	nr	nr	nr	psychologist/psychiatrist, a psychiatric social worker, a social service officer, and a psychiatric nurse/nurse assistant	nr	n/a	n/a	Objective social isolation outcome: the number of people in participants’ social life was measured by a standardised procedure developed from work with child psychiatric patients	Social network of the experimental group increased, while it decreased for the control group, but no significant between-group difference (p > 0.004) (outcomes measured at 2 years post-baseline)	quality of life; service use
27	Glynn 2002	Webber 2017, Newlin 2015 (not extracted)	RCT/quasi-RCT	Social	Capacity and participation	nr	nr	nr	nr	nr	nr	nr	nr	nr	PD	schizophrenia	nr	nr	nr	social skills/ communication training	psychoeducation/social skills training (e.g., SCIT, systematic desensitisation)	Social skills training	In vivo amplified skills training is a behaviourally orientated, manual-based intervention with 60 specific activities, utilising an overarching problem-solving approach to identify opportunities for skill use in the community and establish a liaison with or develop a natural support system to maintain gains	clinic-based skills training without community generalisation support	not reported	not described	Not clear	face-to-face	not clear	not clearly described	Not clear	not clear	not clear	not clear	not clear	not clear	nr	nr	see description	nr	nr	nr	nr	nr	n/a	n/a	role functioning, social relations and social adjustment	Significant improvement in instrumental role functioning, social relations and overall social adjustment	n/a
27	Bustillo 2001 - 61	Morin 2017	Systematic review	Social	Capacity	nr	nr	nr	nr	nr	nr	nr	nr	nr	PD	Schizophrenia/schizoaffective disorders	n/a	n/a	n/a	social skills/ communication training	Social skills training for schizophrenia (SRs and meta-analyses)	social skills training	not described further	nr	not reported	not described	Not clear	not clear	not clear	not described	Not clear	not clear	not clear	not clear	not clear	not clear	nr	nr		nr	nr	nr	nr	nr	social skills	patients with schizophrenia can learn a variety of skills (conversational, interpersonal problem-solving strategies, etc.) and that acquired skills are usually still present after 2 years (the maximum duration of the studies) (61-64)	n/a	n/a	n/a
27	Turner 2014 - 69	Morin 2017	Systematic review	Social	Capacity	nr	nr	nr	nr	nr	nr	nr	nr	nr	PD	Schizophrenia/schizoaffective disorders	n/a	n/a	n/a	social skills/ communication training	Social skills training for schizophrenia (SRs and meta-analyses)	social skills training	not described further	nr	not reported	not described	Not clear	not clear	not clear	not described	Not clear	not clear	not clear	not clear	not clear	not clear	nr	nr		nr	nr	nr	nr	nr	n/a	n/a	n/a	n/a	negative symptoms
28	Conoley 1985	Masi 2011	RCT/quasi-RCT	Social	Capacity	U.S. undergraduate students who scored 1 SD above the mean on UCLA Loneliness Scale and scored as moderately depressed on the BDI	nr	nr	nr	38	nr	nr	nr	nr	PD	moderate depression and lonely	0	inferred mean = 20 years	USA	support for social participation (e.g., social prescribing)	loneliness ints- community dwelling w SMI loneliness ints- psych disruption > traumatic birth experience loneliness ints- adults w physical/MH probs living alone loneliness ints- depressed/traumatised seniors loneliness ints- undergrads w moderate depression on BDI loneliness ints- older adults w suicidal ideation, depression, isolation loneliness ints- naval treinees w BDI > 30 or at-risk stress	Social cognitive training	Individual counseling sessions which emphasized either reframing perception of loneliness or self-control (i.e., trying harder to overcome loneliness).	CG1: no intervention CG2: instructed to “to try harder” to overcome loneliness	not reported	not clearly described	Individual	face-to-face	not clear	not described	Segregated (only for ppl with disability)	yes	no	no	no	no	2 sessions 1 week apart	30 minutes per session	see description	nr	nr	nr	nr	nr	n/a	n/a	20-item UCLA Loneliness Scale	Effect size: -0.32 (95%CI: -0.96, 0.32) - ns [IG vs CG1]	n/a
28	Williams 2004	Masi 2011	RCT/quasi-RCT	Social	Capacity	Recruits at basic training at the Naval Recruit Training Command at Great Lakes, Illinois. Those who scored >=18 on the BDI or >=30 on the Perceived Stress Scale were classified as atrisk recruits	nr	Naval Recruit Training Command at Great Lakes	nr	200	nr	nr	nr	nr	PD	depression or stress	72	m=20	USA	support for social participation (e.g., social prescribing)	loneliness ints- community dwelling w SMI loneliness ints- psych disruption > traumatic birth experience loneliness ints- adults w physical/MH probs living alone loneliness ints- depressed/traumatised seniors loneliness ints- undergrads w moderate depression on BDI loneliness ints- older adults w suicidal ideation, depression, isolation loneliness ints- naval treinees w BDI > 30 or at-risk stress	Social cognitive training	Cognitive behavioral intervention consisted of 10–15 at-risk recruits meeting. Groups were facilitated by a psychologist. Participants read a manual each week, then discussed and practiced strategies for coping, increasing one’s sense of belonging, decreasing thought distortion, and stress management.	Nonintervention and comparison groups participated in weekly meetings that focused on other topics, such as swimming skills and personal hygiene.	Vocational training/work setting	assume on the navy base?	Group (>2 people)	face-to-face	Clinician	psychologist	Segregated (only for ppl with disability)	yes	no	no	no	no	9 weekly sessions	45 min per session	see description	nr	nr	nr	psychologist	nr	n/a	n/a	20-item UCLA Loneliness Scale	Effect size: –0.36 (95%CI: –0.64, –0.08)	n/a
28	Horan 2009	Grant 2017	RCT/quasi-RCT	Social	Capacity	outpatients	nr	nr	nr	31	15	16	2	1	PD	schizophrenia	93.5	m=50.7, m=45.9	nr	social skills/ communication training	Social cognitive training	Social cognitive training	not described	active control group (illness management and relapse prevention skills training)	Clinical - outpatient	not described	Not clear	not clear	not clear	not clearly described	Segregated (only for ppl with disability)	not clear	not clear	not clear	not clear	not clear	12 weeks	1 hour per session	nr	nr	nr	nr	nr	nr	theory of mind affect recognition attribution style	no effects (stats nr) positive effects (stats nr) no effects (stats nr)	n/a	n/a	n/a
29	Roberts 2014	Webber 2017, Grant 2017	RCT/quasi-RCT	Social	Capacity	oupatients	nr	nr	nr	66	33	33	2	1	PD	schizophrenia	67	m=40, m=39.4	nr	social skills/ communication training	SCIT	SCIT	Manualised 20-session group-based intervention delivered by mental health professionals that targets impairments in social cognitions. SCIT uses exercises, games, discussions and interactive social stimuli to improve specific areas of social cognitive dysfunction	TAU	Clinical - outpatient	n/a	Group (>2 people)	face-to-face	Clinician	mental health professional	Segregated (only for ppl with disability)	yes	not clear	not clear	not clear	not clear	20-24 weekly sessions	1 hr per session	not described	nr	nr	nr	nr	nr	theory of mind affect recognition Attribution style global social cognition	no effect (stats nr) reports both positive and null effect (stats nr) no effect (stats nr) no effect (stats nr)	social performance	positive effect (stats nr)	n/a
29	Wang 2013	Webber 2017, Grant 2017	RCT/quasi-RCT	Social	Capacity	outpatients	nr	nr	nr	43	22	21	0	4	PD	schizophrenia	48.8	m=43.9, m=40.9	nr	social skills/ communication training	SCIT	SCIT	not described	TAU	Clinical - outpatient	n/a	Group (>2 people)	face-to-face	Clinician	mental health professional	Segregated (only for ppl with disability)	yes	not clear	not clear	not clear	not clear	20 weeks	nr	not described	nr	nr	nr	nr	nr	theory of mind affect recognition Attribution style	positive effect (stats nr) positive effect (stats nr) no effect (stats nr)	personal and social performance	positive effect (stats nr)	n/a
29	Combs 2007	Grant 2017	RCT/quasi-RCT	Social	Capacity	forensic inpatients	nr	nr	nr	28	18	10	n/a	n/a	PD	schizophrenia - forensic	75	m=41.3, m=44	nr	social skills/ communication training	SCIT	SCIT	not described	coping skills group	Clinical - inpatient	n/a	Not clear	not clear	not clear	not clearly described	Segregated (only for ppl with disability)	not clear	not clear	not clear	not clear	not clear	total sessions/weeks nr	total 18 hours	not described	nr	nr	nr	nr	nr	theory of mind affect recognition Attribution style - aggression subscale social perception knowledge	positive effect (stats nr) positive effect (stats nr) positive effect (stats nr) positive effect (stats nr) no effect (stats nr)	social functioning scale	positive effect (stats nr)	n/a
29	Taylor 2015	Grant 2017	RCT/quasi-RCT	Social	Capacity	forensic inpatients	nr	nr	nr	45	21	15	5	4	PD	schizophrenia - forensic	100	m=40.7, m=39.2	nr	social skills/ communication training	SCIT	SCIT	not described	TAU	Clinical - inpatient	n/a	Not clear	not clear	not clear	not clearly described	Segregated (only for ppl with disability)	not clear	not clear	not clear	not clear	not clear	16 sessions, twice a week	45 mins per session	not described	nr	nr	nr	nr	nr	theory of mind Attribution style	reported both positive and null effects (stats nr) no effect (stats nr)	n/a	n/a	n/a
29	Hasson-Ohayon 2014	Ma 2020, Webber 2017, Anderson 2015, Grant 2017	RCT/quasi-RCT	Social	Capacity	"community patients" with various mental illnesses	nr	nr	nr	55	33	21	1 - nr if IG or CG	nr	PD	various mental illnesses	69	m=38.8	Israel	social skills/ communication training	SCIT	SCIT + social mentoring	Participants received social, leisure, support, and employment services, as well as standard services SCIT intervention group: besides intervention, they also received educational handouts, videos, and slides All received the same social mentoring services to support practical steps toward achieving personally meaningful goals	social mentoring only	Clinical - outpatient	Psychiatric community rehabilitation centre (secondary care setting	Group (>2 people)	face-to-face	Clinician	Social mentors were staff of psychiatric rehabilitation agencies Lead clinicians received training and ongoing supervision. All clinicians had experiences in providing psychiatric rehabilitation services and completed a SCIT workshop	Segregated (only for ppl with disability)	yes	no	no	no	no	SCIT: weekly for 8 weeks social mentoring: 3 weekly meetings	1 hr per session	not described	nr	nr	nr	psychiatric service staff	nr	theory of mind affect recognition Attribution style	positive effect (stats nr) no effect (stats nr) no effect (stats nr)	Objective social isolation outcome: the socio-engagement and interpersonal-communication subscales of the Social Functioning Scale (SFS)	Experimental group showed significantly more improvement in social engagement than the controls (F (1,53) = 28.9, p < 0.001, effect size = 0.35), but no significant between-group difference for the interpersonal communication subscale (F (1,53) = 0.55, p = 0.464, effect size = 0.01)	n/a
29	Gohar 2013	Grant 2017	RCT/quasi-RCT	Social	Capacity	outpatients	nr	nr	nr	82	42	40	0	0	PD	schizophrenia	80.5	m=32.9, m=30.8	nr	social skills/ communication training	Social Cognitive Skills Training	Social Cognitive Skills Training	not described	"Skills training control group"	Clinical - outpatient	not described	Not clear	not clear	not clear	not clearly described	Segregated (only for ppl with disability)	not clear	not clear	not clear	not clear	not clear	2 sessions per week for 8weeks	nr	not described	nr	nr	nr	nr	nr	affect recognition	positive effects (stats nr)	n/a	n/a	n/a
29	Horan 2011	Grant 2017	RCT/quasi-RCT	Social	Capacity	outpatients	nr	nr	nr	85	49	36	15	nr	PD	schizophrenia	85.9	m=51, m=46.6, m=50.4, m=45.1		social skills/ communication training	Social cognitive training	IG1: Social Cognitive Skills training IG2: Neurocognitive remediation IG3: Hybrid	not described	Standard illness management	Clinical - outpatient	not described	Not clear	not clear	not clear	not clearly described	Segregated (only for ppl with disability)	not clear	not clear	not clear	not clear	not clear	IG1: 24 sessions IG2: not defined IG3: not defined	nr	IG1: social skills IG2: neurocognition IG3: both	nr	nr	nr	nr	nr	theory of mind affect recognition attribution style attribution style - aggression attribution style - blame	no effects (stats nr) positive effects (stats nr) no effects (stats nr) positive effects (stats nr) positive effects (stats nr)	n/a	n/a	n/a
29	Gil Sanz 2009	Grant 2017	RCT/quasi-RCT	Social	Capacity	community	nr	nr	nr	14	7	7	n/a	n/a	PD	schizophrenia	50	m=33.3, m=41.4	nr	social skills/ communication training	Social Cognition Training Program (PECS)	Social Cognition Training Program (PECS)	not described	not clear (received ER training, not SP)	not reported	not described	Not clear	not clear	not clear	not clearly described	Segregated (only for ppl with disability)	not clear	not clear	not clear	not clear	not clear	nr	nr	not described	nr	nr	nr	nr	nr	n/a	n/a	n/a	n/a	personal care and daily activities
29	Gil-Sanz 2016 (was 2014 in Grant 2017)	Grant 2017	RCT/quasi-RCT	Social	Capacity	community	nr	nr	nr	83	44	39	n/a	n/a	PD	schizophrenia	52.2	m=37.1, m=43.8	nr	social skills/ communication training	Social Cognition Training Program (PECS)	Social Cognition Training Program (PECS)	not described	Attention and memory	not reported	not described	Not clear	not clear	not clear	not clearly described	Segregated (only for ppl with disability)	not clear	not clear	not clear	not clear	not clear	nr	nr	not described	nr	nr	nr	nr	nr	theory of mind affect recognition	positive effects (stats nr) positive effects (stats nr)	n/a	n/a	n/a
29	Bechi 2015	Grant 2017	RCT/quasi-RCT	Social	Capacity	outpatients	nr	nr	nr	75	56	19	n/a	n/a	PD	schizophrenia	57.3	m=40.3, m=38.1, m=37.2	nr	social skills/ communication training	Theory of mind intervention Theory of mind intervention and Social Cognitive Training Group	IG1: Theory of Mind Intervention IG2: Social Cognition therapy	not described	active control group (not described)	Clinical - outpatient	not described	Not clear	not clear	not clear	not clearly described	Segregated (only for ppl with disability)	not clear	not clear	not clear	not clear	not clear	IG1: 18 sessions, twice a week IG2: 12 weeks + cognitive remediation therapy 2 1 hr sessions per week (not clear if this is for both IGs)	1 hour per session	IG1: theory of mind IG2: social cognition + cognitive remediation	nr	nr	nr	nr	nr	theory of mind	positive effects (stats nr)	n/a	n/a	n/a
29	Bechi 2012	Grant 2017	RCT/quasi-RCT	Social	Capacity	outpatients	nr	nr	nr	76	52	24	1	2	PD	schizophrenia	65.8	m=37, m=38, m=40	nr	social skills/ communication training	Social cognitive training	IG1: Social Rehabilitation Training IG2: Social Cognition Training	video-based training in AR (not defined) and Theory of Mind	No treatment	Clinical - outpatient	not described	Not clear	not clear	not clear	not clearly described	Segregated (only for ppl with disability)	not clear	not clear	not clear	not clear	not clear	12 weeks	1 hour per session	AR and Theory of Mind	nr	nr	nr	nr	nr	theory of mind affect recognition	positive effects (stats nr) no effects (stats nr)	n/a	n/a	n/a
29	Stravynski 1982	Ma 2020	RCT/quasi-RCT	Social	Participation	adults w diffuse social phobia and avoidant personality disorder	nr	nr	nr	22	nr	nr	nr	nr	PD	diffuse social phobia and avoidant personality disorder	nr	22-57 years	UK	social skills/ communication training	Social Skill Training & Cognitive Remediation	Social skill training + cognitive modification	Social skill training plus cognitive modification, participants analysed a distressing event in five steps: (1) activating event with descriptions; (2) irrational beliefs; (3) emotional consequences; (4) dispute; (5) plan for new actions	Social skills training: focused on individual needs by discussing specific social targets; techniques included instructions, modelling, role-rehearsal, feedback, self-monitoring, and homework	Clinical - in/outpatient not clear	The Maudsley hospital in London, UK (secondary care setting)	Individual	face-to-face	Clinician	Provided by one psychiatrist	Segregated (only for ppl with disability)	no	no	no	no	no	12 sessions over 14 weeks	1.5 hr per session	see description	nr	nr	nr	psychiatrist	nr	n/a	n/a	Objective social isolation outcome: objective social isolation subscale of the Structured and Scaled Interview to Assess Maladjustment (SSIAM)	No significant between-group difference in social isolation, all groups reported less experience of social isolation over time p > 0.05 Measured at end of Rx and 6m fu	Depression
29	Tas 2012	Grant 2017	RCT/quasi-RCT	Social	Capacity	outpatients	nr	nr	nr	45	19	26	3	1	PD	schizophrenia	51.14	m=33.3, m=34.6	nr	social skills/ communication training	Family involvement in Social Cognitition training (F-SCIT)	Family involvement in Social Cognitition training (F-SCIT)	not described further	social stimulation	Clinical - outpatient	not described	Not clear	not clear	not clear	not clearly described	Segregated (only for ppl with disability)	not clear	not clear	not clear	not clear	not clear	14 weeks	nr	based on social cognitive interaction training	nr	nr	nr	nr	nr	theory of mind affect recognition attribution style social perception knowledge	positive effects (stats nr) positive effects (stats nr) no effects (stats nr) positive effects (stats nr)	Social Functioning Scale	positive effects (stats nr)	n/a
30	Galli Carminati 2007	Bundock 2017	NRCT-No control	social	Capacity	nr	nr	residential program participants	nr	Cohort 1: 10 Cohort 2: 9	19	0	nr	n/a	ID	PDD and ID	78.9474	m=38.3, m=39.7	Switzerland	social skills/ communication training	TEACCH-based social skills/ communication training targeting negative problem behaviour	TEACCH-based social skills/ communication training targeting negative problem behaviour	A program comprising education, communication, socialisation, behaviour management and work with families. Cohort 1 received external workshops and Cohort 2 stayed in their residential setting (is this a control group not receiving the TEACCH program at all?!).	no CG	Residential/home	Residential setting for cohort 2	Individual	face-to-face	not clear	not described	Segregated (only for ppl with disability)	no	no	yes	yes	no	nr	nr	see description	nr	nr	nr	nr	nr	1. Aberrant behaviour checklist (ABC) 2. Childhood Autism Rating Scale (CARS)	Cohort 1: ABC =significant decrease in social withdrawal (p=0.001), no change in CARS scores... when social contact increased, targeted negative behaviours decreased. Cohort 2: No significant changes over time. No decrease on ABC, no changes on CARS	Social withdrawal	a significant decrease in social withdrawal for the cohort receiving more social contact - the increased engagement with participants may have led to greater initiation and more positive social behaviours, regardless of intervention type	n/a
30	McGaw 2002	Howarth 2016, Wilson 2014	RCT/quasi-RCT	Social	Participation	parents with borderline/mild ID	nr	nr	nr	22	nr	nr	nr	nr	ID	mild/borderline ID	36.3636	m=29.1, m=30.4	England	social skills/ communication training	group sessions focused on raising social awareness and enhancing interpersonal communications/listening, using CBT curriculum based approach	Social Skill based group program	Group sessions, semi-structured, included exercises incorporating learning objectives that intended to raise social awareness and enhance interpersonal communications and listening in relationships, used a CBT curriculum based approach	not described	not reported	not described	Group (>2 people)	face-to-face	not clear	not clearly described	Segregated (only for ppl with disability)	yes	no	no	no	not clear	14 weeks	2 hours per week	see description	nr	nr	nr	nr	nr	n/a	n/a	Social Changes Questionnaire – qualitative measure of parents’ perceptions of change to their social lives – have any changes been positive/negative, description of changes, frequency	A total of 64% of the Experimental Group parents reported positive changes resulting from improved relationships with partners and new friendships. In contrast, none of the Control Group parents reported positive changes in life during the same period. Parents within the Experimental Group developed an informal support group of their own immediately after the formal group was disbanded	1. Judson Self-rating Scales (Judson & Burden 1980) 2. Malaise Inventory (Rutter et al. 1970)
30	McConnell 2009	Howarth 2016, Wilson 2014	NRCT-No control	Social	Capacity and participation	mothers with LD	nr	nr	nr	42	42	0	nr	n/a	ID	learning disability	0	17-48 years, m=31.1	Australia	social skills/ communication training	australian supported learning program for mothers	Australian Supported Learning Program (ASLP)	Individual case management and group-based supported learning programme where mothers meet, talk and learn together over a 12-week period. Mothers also receive one to one support to work on their individual goals	no CG	not reported	not described	Individual and group	face-to-face	not clear	not clearly described	Segregated (only for ppl with disability)	yes	no	no	no	no	12 weeks, including 8-10 weeks of group work phase	2 hours per week	see description	nr	nr	nr	nr	nr	n/a	n/a	Social Relationships: Tilden Interpersonal Relationships Inventory (IPRI) Short Form self-report 26 items, sub scores: perceived social support (a = 0.91), conflict interpersonal relationships (a = 0.81)	Positive effects on mother’s social relationships and psychological well-being were found with participating mothers are now more confident about ‘getting out and about’ within their respective communities; they are more aware of opportunities and resources available there, and some are now taking advantage of these, for example, joining other groups and enrolling in courses	1. ASLP Program Goal Achievement Scale 2. Personal Goal Attainment Scale 3. Scales of Mastery and Constraints (Lachman & Weaver 1998) 4. Depression, Anxiety and Stress Scale (DASS: Lovibond & Lovibond 1995)
30	Iconaru 2014	Louw 2019	NRCT-No control	Social and community	Capacity	nr	nr	nr	nr	10	10	0	nr	n/a	ID	severity not reported	both genders, % nr	18-20	Romania	social skills/ communication training	training module for developing social and civic competencies	social/rights training: training module for developing social and civic competencies	not described further	no CG	not reported	not described	Not clear	face-to-face	not clear	not clearly reported	Segregated (only for ppl with disability)	yes	no	no	no	no	7-day module	nr	not described	nr	nr	nr	nr	nr	n/a	n/a	n/a	n/a	QoL
31.1	Turner‐Brown 2008	Atkinson-Jones 2018, Lorenc 2018, Pallathra 2019, Palmen 2012, Tobin 2014	RCT/quasi-RCT	Social	Capacity	nr	nr	nr	nr	11	6	5	nr	nr	ASD	ASD without ID/HF-ASD	91	m=36	USA	social skills/ communication training	Social Cognition and Interaction Training (SCIT‐A; Turner‐Brown et al., 2008)	Social Cognition and Interaction Training (SCIT‐A)	group social-cognitive training programme using video cues. Each session included a review of the agenda, check-ins and homework review, and activities related to the session’s topic. Pallathra: SCIT-A included didactic sessions focusing on three aspects of social cognition: emotion recognition, directing attention in social interactions, and perspective taking.	TAU	not reported	not described	Group (>2 people)	face-to-face	not clear	not described	Segregated (only for ppl with disability)	yes	no	no	no	no	1 session weekly for 18 weeks	50 minutes per session	concept instruction, discussion, response identification, role-play, practice, and homework	nr	computer	nr	nr	nr	1. Social Communication Skills Questionnaire 2. Social Skills Performance Assessment	1. Hedges G = 0.30 (-0.90, 1.50)ns 2. Hedges G = -0.02 (-1.20, 1.17)ns Intervention participants demonstrated significant improvements on primary outcomes measures of face emotion identification and theory of mind as compared to the treatment as usual control group of adults with ASD. Yet, the groups did not differ significantly on a more general measure of social communication skills. From Atkin…	n/a	Attendance was good (average 92%), and 5 out of 6 participants rated the group as ‘‘useful’’ or ‘‘very useful’’.	n/a
31.1	Fullerton 1999	Pallathra 2019, Palmen 2012	NRCT-No control	Social	Capacity	nr	nr	nr	nr	8	8	0	nr	nr	ASD	HF-ASD and Aspergers	75	16-27 years	nr	social skills/ communication training	Putting Feet on my dreams	Putting Feet on my dreams	Social skills group (communication program unit): concept instruction and discussion, visual and written information on skills, response identification, discussion, videotaped role-play, self-reflection on role-play using checklists	no CG	not reported	not described	Group (>2 people)	face-to-face	not clear	not clearly described	Segregated (only for ppl with disability)	yes	no	no	no	no	10 sessions	2-3 hour sessions per week	see description	nr	nr	nr	nr	nr	quality of dyadic conversation skills (e.g., turn taking, eye contact, paraphrasing)	improvement (stats nr - speech therapist observations)	n/a	n/a	n/a
31.1	Pugliese 2013	Pallathra 2019, Lorenc 2018	NRCT-No control	Social	Capacity	nr	nr	nr	nr	5	5	0	nr	nr	ASD	ASD without ID	100	m=21	USA	social skills/ communication training	Problem Solving Skills 101	Problem Solving Skills 101	social problem solving programme	no CG	Post-secondary school education	College setting	Group (>2 people)	face-to-face	not clear	not clearly described	Segregated (only for ppl with disability)	not clear	not clear	not clear	not clear	not clear	1 session per week for 9 weeks	nr	see description	nr	nr	nr	nr	nr	social problem solving inventory	increased (stats nr, ns) significant improvements on a task of social problem-solving skills for some participants	n/a	n/a	n/a
31.1	Lovett 2014	Pallathra 2019	NRCT-No control	Social	Capacity	nr	nr	nr	nr	3	3	0	nr	n/a	ASD	severity nr	nr	nr	nr	social skills/ communication training	Social functioning (intervention not defined)	social skills training	interventions targeting the identification of social cues and the use of perspective taking skills using multiple exemplar instruction to effectively teach perspective taking skills	no CG	not reported	not described	Group (>2 people)	face-to-face	not clear	not clearly described	Segregated (only for ppl with disability)	yes	no	no	no	no	1-3 sessions per week for 4-6 weeks	30-45 minutes per session	see description	nr	nr	nr	nr	nr	social skill generalisation	"findings showed varying degrees of generalization of skills to more natural social interactions"	n/a	n/a	n/a
31.1	Minihan 2007	Lorenc 2018	NRCT	Social	Capacity	nr	nr	nr	nr	22	nr	nr	nr	nr	ASD	ASD without ID	91	m=27	Ireland	social skills/ communication training	Social skills group	Social Skills training	training including roleplay, group discussion and feedback	unclear	not reported	not described	Group (>2 people)	face-to-face	not clear	not clearly described	Segregated (only for ppl with disability)	yes	no	no	no	no	nr	nr	see description	nr	nr	nr	nr	nr	1. Eye contact 2. Gestures 3. Attention 4. Feedback questions 5. Conversation initiation 6. conversation maintenance 7. conversation handover 8. perseveration 9. no interaction 10. inappropriate statements	1. Hedges G = 0.50 (-0.51, 1.51)ns 2. Hedges G = 0.26 (-0.74, 1.26)ns 3. Hedges G = 0.95 (-0.10, 1.99)* 4. Hedges G = 1.85 (0.69, 3.02)* 5. Hedges G = 0.20 (-0.80, 1.20)ns 6. Hedges G = -0.18 (-1.18, 0.82)ns 7. Hedges G = 1.48 (-0.38, 2.59)ns 8. Hedges G = 0.25 (-0.75, 1.25)ns 9. Hedges G = 0.24 (-0.75, 1.25)ns 10.Hedges G = -0.45 (-1.46, 0.56)ns	n/a	n/a	n/a
31.1	Howlin 1999	Atkinson-Jones 2018, Lorenc 2018,Pallathra 2019, Tobin 2014, Palmen 2012	NRCT-No control	Social	Capacity	nr	nr	nr	nr	10	10	0	nr	nr	ASD	ASD without ID	100	m=28	UK	social skills/ communication training	Social Skills Programme (Howlin & Yates, 1999)	Social Skills Programme	social skills groups including education, roleplays and team activities. Intervention was designed to foster independence, understanding of appropriate ways of dealing with social difficulties, and improved conversation skills including strategies for initiation and maintenance, responding to questions, and avoiding stereotyped responses. Participants worked on solving real-life difficulties the …	no CG	not reported	not described	Group (>2 people)	face-to-face	not clear	not described	Segregated (only for ppl with disability)	yes	no	no	no	no	12 months	2.5 hours per month	social skills groups including education, roleplays and team activities, and homework	running social skills groups and informal support groups is neither very expensive nor very time-consuming and could make a significant difference for adults with ASD.	nr	nr	nr	nr	Party scenario: 1. total utterances 2. % maintaining/initiating conversations 3. %appropriate responses 4. %inappropriate utterances/repetitions Job enquiry scenario: 5. total utterances 6. % appropriate responses 7. % inappropriate utterances/repetitions 8. % social utterances	1. reduced (stats nr, ns) 2. increased (stats nr, sig) 3. reduced (stats nr, ns) 4. increased (stats nr, ns) 5. increased (stats nr, ns) 6. increased (stats nr, sig) 7. increased (stats nr, sig) 8. reduced (stats nr, ns) All but one participant reported enjoying the group and that the group had helped them better understand the issues associated with having ASD	n/a	n/a	n/a
31.1	Ashman 2017	Atkinson-Jones 2018	RCT/quasi-RCT	Social	Capacity	nr	nr	nr	nr	19	nr	nr	nr	nr	ASD	IQ>70	68	19-55 years	UK	social skills/ communication training	Social Skills Group (Ashman et al., 2017)	Social Skills Group	Recognising and expressing emotions, conversational skills (e.g., verbal and nonverbal communication, small talk and conversation starters), understanding friendships and family relationships, discussing disclosure, coping with awkward situations, employment, assertiveness and dating. Using role‐play, discussion groups, multimedia, paper exercises and scripts techniques	active control: social interaction group; SIG. The SIG and the treatment group included similar themes and activities (e.g., role‐play and discussions), but the SIG contained no training element	not reported	not described	Group (>2 people)	face-to-face	not clear	not described	Segregated (only for ppl with disability)	yes	no	no	no	no	16 weekly sessions + homework weekly	1 hr per session		nr	nr	nr	nr	nr	social cognition (Reading the Mind in the Voice Task; RMV; Rutherford, Baron‐Cohen, & Wheelwright, 2002; and Reading the Mind in the Eyes task, RME; Baron‐Cohen, Wheelwright, Hill, Raste, & Plumb, 2001)	significant improvements in social skills (SRS‐2), ToM skills (RME) There were no differences between groups, but there was a trend towards greater significant improvement for the social skills group for ToM skills (RME, RMV) and social functioning (WFIRS). BUT NOTE THAT THE CONTROL GROUP ALSO INVOLVE SOCIAL INTERACTIONS, JUST WITHOUT EXPLICIT TRAINING	Social functioning in different contexts (Weiss Functional Impairment Rating Scale Self‐Report; Weiss & Weiss, 2004). The Social Responsiveness Scale—Second Edition (SRS‐2; Constantino & Gruber, 2012) assessed carers’ and friends’ perceptions of individuals’ social ability across contexts.	Significant improvements in social functioning (WFIRS). There were no differences between groups, but there was a trend towards greater significant improvement for the social skills group for ToM skills (RME, RMV) and social functioning (WFIRS). BUT NOTE THAT THE CONTROL GROUP ALSO INVOLVE SOCIAL INTERACTIONS, JUST WITHOUT EXPLICIT TRAINING	n/a
31.2	Gantman, 2012	Atkinson-Jones 2018, Pallathra 2019, Tobin 2014, Lorenc 2018	RCT/quasi-RCT	Social	Capacity and participation	nr	nr	nr	nr	17	9	8	nr	nr	ASD	ASD without ID	71	m=20	USA	social skills/ communication training	Program for the Education and Enrichment of Relational Skills for Young Adults (PEERS‐YA; Laugeson & Frankel, 2010)	Program for the Education and Enrichment of Relational Skills for Young Adults (PEERS‐YA; Laugeson & Frankel, 2010)	a caregiver-assisted social skills program for adolescents with ASD but adapted for young adults. Participants and caregivers attend different sessions. The primary goal is to provide instruction and rehearsal of social skills specifically related to building and maintaining peer relationships. Topic areas included dating etiquette, strategies for handling peer pressure, conversation skills, and …	no intervention	not reported	not described	Group (>2 people)	face-to-face	not clear	not described	Segregated (only for ppl with disability)	yes	no	no	yes	no	1 session weekly for 14 weeks	1.5 hours per session	see Gantman 2012 description	nr	nr	nr	nr	nr	Social Skills Rating System Empathy quotient	Hedges G = 1.48 (0.37, 2.59)* Hedges G = 1.02 (-0.01, 2.05)* "improved social skills and social skills knowledge"	1. social responsiveness scale 2. social and emotional loneliness scale for adults 3. Quality of socialisation Questionnaire - invited get-togethers 4. Quality of socialisation Questionnaire - hosted get-togethers	1. Hedges G = 1.05 (0.02, 2.08)* 2. Hedges G = 1.00 (-0.03, 2.03)* 3. Hedges G = 1.20 (0.14, 2.26)* 4. Hedges G = 0.83 (-0.18, 1.83)* "significantly less loneliness ... and increased frequency of get-togethers as compared to the wait-list control group"	n/a
31.2	Laugeson 2015	Lorenc 2018, Pallathra 2019	RCT/quasi-RCT	Social	Capacity and participation	nr	nr	nr	nr	22	12	10	nr	nr	ASD	ASD without ID	77	m=20	USA	social skills/ communication training	Program for the Education and Enrichment of Relational Skills for Young Adults (PEERS‐YA; Laugeson & Frankel, 2010)	Program for the Education and Enrichment of Relational Skills for Young Adults (PEERS‐YA; Laugeson & Frankel, 2010)	as per Gantman 2012	no intervention	not reported	not described	Group (>2 people)	face-to-face	not clear	not described	Segregated (only for ppl with disability)	yes	no	no	yes	no	1 session weekly for 16 weeks	1.5 hours per session	see Gantman 2012 description	nr	nr	nr	nr	nr	Social Skills Rating System Empathy quotient	Hedges G = 0.10 (-0.85, 1.05)* Hedges G = 1.02 (-0.01, 2.05)* "improved social skills and social skills knowledge, and increased frequency of get-togethers as compared to the wait-list control group"	1. social responsiveness scale 2. Quality of socialisation Questionnaire - self-report 3. Quality of socialisation Questionnaire - caregiver report	1. Hedges G = 1.26 (0.19, 2.32)** 2. Hedges G = 1.16 (0.11, 2.21)* 3. Hedges G = 2.58 (1.21, 3.96)*	n/a
31.2	White 2014	Atkinson-Jones 2018, Lorenc 2018	NRCT-No control	Social	Capacity and participation	nr	nr	nr	nr	5	5	0	nr	nr	ASD	ASD without ID	100	m=24	USA	social skills/ communication training	Program for the Education and Enrichment of Relational Skills for Young Adults (PEERS‐YA; Laugeson & Frankel, 2010)	Program for the Education and Enrichment of Relational Skills for Young Adults (PEERS‐YA; Laugeson & Frankel, 2010)	as per Gantman 2012	no CG	not reported	not described	Group (>2 people)	face-to-face	not clear	not described	Segregated (only for ppl with disability)	yes	no	no	yes	no	nr	nr	see Gantman 2012 description	nr	nr	nr	nr	nr	Contextual assessment of social skills: 1. Asking questions domain 2. Topic changes domain 3. Overall involvement domain 4. Overall quality of rapport domain 5. Social anxiety domain	All improved within subjects (stats nr)	n/a	n/a	n/a
31.2	McVey et al., 2016	Atkinson-Jones 2018, Pallathra 2019, Lorenc 2018	RCT/quasi-RCT	Social	Capacity and participation	nr	nr	nr	nr	53	29	24	nr	nr	ASD	ASD without ID	83	m=20	USA	social skills/ communication training	Program for the Education and Enrichment of Relational Skills for Young Adults (PEERS‐YA; Laugeson & Frankel, 2010)	Program for the Education and Enrichment of Relational Skills for Young Adults (PEERS‐YA; Laugeson & Frankel, 2010)	as per Gantman 2012	no intervention	not reported	not described	Group (>2 people)	face-to-face	not clear	not described	Segregated (only for ppl with disability)	yes	no	no	yes	no	1 session weekly for 16 weeks	1.5 hours per session	see Gantman 2012 description	nr	nr	nr	nr	nr	1. Social Skills Improvement system - social skill domain 2. Social Skills Improvement system - compet problem behaviours domain 3. Empathy quotient	1. Hedges G = 0.21 (-0.37, 0.78)ns 2. Hedges G = 0.57 (-0.01, 1.15)* 3. Hedges G = 0.42 (-0.16, 1.00)*	1. social responsiveness scale 2. Quality of socialisation Questionnaire for YA 3. Social and emotional loneliness scale - emotion/romantic domain 4. Social and emotional loneliness scale - family loneliness domain 5. Social and emotional loneliness scale - social loneliness domain	1. Hedges G = 0.41 (-0.17, 0.99)* 2. Hedges G = 0.38 (-0.19, 0.96)* 3. Hedges G = 0.13 (-0.44, 0.71)ns 4. Hedges G = -0.06 (-0.63, 0.52)ns 5. Hedges G = -0.20 (-0.77, 0.38)ns	1. liebowitz social anxiety scale 2. social phobia inventory
32	Tiger 2007	Palmen 2012	Multiple baseline case study	Social	Capacity	nr	nr	nr	nr	1	1	0	0	n/a	ASD	Aspergers	100	19 years	nr	social skills/ communication training	individualised communication skill training	individualised communication skill training	Differential reinforcement (praise, token) combined with rule instruction and corrective feedback using verbal instruction	Baseline: presenting questions to answer	not reported	not described	Individual	face-to-face	not clear	not clearly described	Segregated (only for ppl with disability)	no	no	no	no	no	Study 1: 17 sessions Study 2: 19 sessions	nr	see description	nr	nr	nr	nr	nr	Study 1: Short response latency in question responding Study 2: Short response latency and accuracy in math problem solving	latencies and accuracy increased in both studies	n/a	n/a	n/a
32	Perdue 2016	Lorenc 2018	Multiple baseline case study	Social	Capacity	nr	nr	nr	nr	5	5	nr	nr	nr	ASD	ASD without ID	80	nr	USA	social skills/ communication training	social skills training w video feedback/modelling	social skills training w video feedback/modelling	not described further	Social skills training using lectures	not reported	n/a	Individual	face-to-face	not clear	not clearly described	Segregated (only for ppl with disability)	not clear	not clear	not clear	not clear	not clear	nr	nr	see description	nr	nr	nr	nr	nr	1. Appropriate verbal engagement 2. non-verbal engagement 3. food etiquette	1. increased (stats nr, ns) 2. increased (stats nr, ns) 3. increased (stats nr, ns)	n/a	n/a	n/a
32	Shireman 2016	Lorenc 2018	Multiple baseline case study	Social	Capacity	nr	nr	nr	nr	3	3	0	nr	nr	ASD	ASD without ID	67	m=23	USA	social skills/ communication training	social play skills program for children (delivered to adults as well as children)	social play skills program for children (delivered to adults as well as children)	not described	no CG	not reported	not described	Individual	not clear	not clear	not clearly described	Segregated (only for ppl with disability)	not clear	not clear	not clear	not clear	not clear	nr	nr	nr	nr	nr	nr	nr	nr	Frequency of social initiations % social reciprocation % social engagement Non-verbal interactions Verbal interactions Perceived effectiveness Rapport	All improved (stats nr, ns)	n/a	n/a	n/a
32	Gaylord-Ross 1984	Bundock 2017	Multiple baseline case study	Social	Capacity	nr	nr	youths attending special education class	nr	3	3	0	0	n/a	ASD & ID	ASD and mod-sev ID	100	17-20 years	nr	social skills/ communication training	social skills/ communication training: positive initiation and engagement in interactions	Social skills training	5 experimental conditions: no-object baseline, object only, object function training, social skills (SS) training and maintenance	no object baseline	School	"youths attending special education class"	Individual	face-to-face	not clear	not described	Segregated (only for ppl with disability)	not clear	not clear	not clear	not clear	not clear	1-2 training sessions per day, number of days nr	5 minutes per session	see description	nr	nr	nr	nr	nr	Direct observation of social behaviours	SS training was successful in teaching social skill sequences. The participants initiated and sustained interactions with a variety of peers and play objects 1. (a) and (b) Correct responses increased from 5-50% at baseline to 80-100% at training and retention (c) Correct responses increased from 10-20% at baseline to 90- 100% at SS training 2. Autistic initiated responses: (a) Increased from 0 a…	n/a	n/a	n/a
32	Kandalaft 2013	Lorenc 2018	NRCT-No control	Social	Capacity	nr	nr	nr	nr	8	8	0	nr	nr	ASD	ASD without ID	75	m=21	USA	social skills/ communication training	one-to-one social skills coaching/feedback w video feedback	one-to-one social skills coaching/feedback w video feedback	coaching a feedback using avatars in virtual reality environment. used virtual reality technology to provide an opportunity for participants to engage in realistic social scenarios and receive performance feedback, in addition to receiving training on social cognition concepts	No CG	not reported	n/a	Individual	face-to-face	not clear	not clearly described	Segregated (only for ppl with disability)	not clear	not clear	not clear	not clear	not clear	2 sessions per week for 5 weeks	1 hr per session	see description	nr	VR set-up	nr	nr	nr	Social skills performance assessment	increased (stats nr, ns)	n/a	n/a	n/a
32	Koegel 2013	Pallathra 2019	NRCT-No control	Social	Capacity	nr	nr	nr	nr	3	3	0	nr	n/a	ASD	ASD without ID	100	m=22	USA	social skills/ communication training	Social functioning and mentoring	Social functioning training	Participants worked on concrete organizational skills (e.g., using a planner, inviting peers to activities) that would enable them to engage socially. mentoring program to support engagement in social activitities.	no CG	Post-secondary school education	university setting	Individual	face-to-face	not clear	not clearly described	Segregated (only for ppl with disability)	no	no	no	no	no	33 weeks	1 hr p/week	see description	nr	nr	nr	nr	nr	n/a	n/a	1. social event participation, satisfaction with college and peer relationships 2. number of social activities	1. Participants reported attending more social events, as well as a greater satisfaction with their college experience and peer interactions. 2. positive effects (stats nr)	QoL Grades, employment
32	White 2016	Pallathra 2019, Lorenc 2018	RCT/quasi-RCT	Social and community	Capacity and participation	nr	nr	nr	nr	8	4	4	nr	nr	ASD	ASD without ID	62	m=20	USA	social skills/ communication training	Brain-Computer interface for college students with ASD	Brain-Computer interface for college students with ASD	psychoeducation combined with social activities and coaching	VR social skills training using brain computer biofeedback	not reported	not described	Individual	face-to-face	not clear	not clearly described	Segregated (only for ppl with disability)	no	no	no	no	no	10-14 sessions	40 minutes per week	nr	nr	nr	nr	nr	nr	n/a	n/a	student adaptation to college questionnaire	Hedges G = 0.05 (-1.34, 1.44)ns	dbarkeley deficits in executive functioning scale
33.1	Elgie 2001	Hutchinson 2015	Multiple baseline case study	Social	Capacity	person with a profound intellectual disability who was blind	nr	nr	nr	1	1	0	0	n/a	ID	profound ID and blindness	0	39 years	UK	support for social participation (e.g., social prescribing, loneliness intervention)	Intensive Interaction support/interventions	Intensive Interaction support/interventions	Intensive Interaction to improve Hand contact, to reduce vocalisations, and reduce and Self-Injurious Behaviour	no CG	not reported	not described	Individual	face-to-face	Clinician	Clinical Psychologist and Trainee Psychologist	Segregated (only for ppl with disability)	yes	no	no	no	no	3 X week for 16 weeks	nr		nr	nr	nr	psychologist	nr	n/a	n/a	hand contact	Increase in hand contact.	self-injurious behaviour and vocalisations
33.1	Leaning 2006	Hutchinson 2015	Multiple baseline case study	Social	Capacity	people with PMID	nr	nr	nr	3	3	0	0	n/a	ID	PMID	33.3	28-38 years	UK	support for social participation (e.g., social prescribing, loneliness intervention)	Intensive Interaction support/interventions	Intensive Interaction support/interventions	Intensive interaction for eye contact, smiling and avoidance of self-stimulation	no CG	not reported	"group setting"	Group (>2 people)	face-to-face	Clinician	music therapist and trainee psychologist	Segregated (only for ppl with disability)	yes	no	no	no	no	8-week group	50 minutes per week		nr	nr	nr	psychologist	nr	social behaviour and self-stimulation	Increase in all social behaviours for 3 participants. Decrease in active avoidance and self-stimulation, variable results attributed to session cancellation	n/a	n/a	n/a
33.1	Lovell 1998	Hutchinson 2015	Multiple baseline case study	Social	Capacity	person with PMID at a long-stay hospital	nr	nr	nr	1	1	0	0	n/a	ID	PMID	100	53 years	UK	support for social participation (e.g., social prescribing, loneliness intervention)	Intensive Interaction support/interventions	Intensive Interaction support/interventions	Intensive interaction for physical contact, looking at people and joint attention	no CG	Residential/home	"long-stay hospital"	Individual	face-to-face	Clinician	clinical psychologist	Segregated (only for ppl with disability)	yes	no	no	no	no	17 sessions in 3 days	"alternating 5 minute interaction"		nr	nr	nr	psychologist	nr	sociali behaviours, vocalizations	Increase in physical contact, looking at people and joint attention in the II sessions. No consistent changes in vocalizations, smile/laughing, and looking at toy Reduction in covering face with clothes in II sessions, following an unstable baseline	n/a	n/a	n/a
33.1	Nind 1999	Hutchinson 2015	Multiple baseline case study	Social	Capacity	person with autism, living at a long-stay hospital	nr	nr	nr	1	1	0	0	n/a	ASD	ASD	100	28 years	UK	support for social participation (e.g., social prescribing, loneliness intervention)	Intensive Interaction support/interventions	Intensive Interaction support/interventions	Intensive interaction for interactive behaviours, initiation of social contact, responses to proximity	no CG	Residential/home	"long-stay hospital"	Individual	face-to-face	Teacher	not described	Segregated (only for ppl with disability)	yes	no	no	no	no	57 weeks, frequency nr	nr		nr	nr	nr	nr	nr	social interactions and benefits to staff	Unstable baseline prevents full analysis, but there is a drop in self-involvement. Increase in sociability. No respondents highlighted difficulties in using II with students with autism. Benefits for learners: increased selfmotivation, and sociability, increased calm. Benefits for staff: improved motivation, feeling positive about the children and work, being receptive to pupil’s signals	n/a	n/a	n/a
33.1	Nind 1996	Hutchinson 2015, Bundock 2017	Multiple baseline case study	Social	Capacity	people living in a long-stay hospital	nr	nr	nr	6	6	0	0	n/a	ID	PMID	nr	27-36 years	UK	support for social participation (e.g., social prescribing, loneliness intervention)	Intensive Interaction support/interventions	Intensive Interaction support/interventions	Intensive interaction for social and communicative abilities	no CG	Residential/home	"long-stay hospital"	Individual	face-to-face	Teacher	not described	Segregated (only for ppl with disability)	yes	no	no	no	no	daily sessions over 12-18 months	nr		nr	nr	nr	nr	nr	social contact/initiation From Bundock: Observation and video analysis 2 observation schedules; 1. Sociability observation schedule (SOS) 2. Pre-verbal communication schedule (PVCS) 3. Adapted cuddliness scale Behaviours were observed over 3 minutes and scored every 5 seconds from videotapes of intensive interaction sessions	Increases in initiation of social contact and increases in time spent in interactive behaviour in 5 participants. New interactive behaviour in some participants. Advances in PVCS and cuddliness scale for all participants *** Improvements were not always directly concurrent with the start of the intervention, casting doubt on the intervention as cause; however; participants had long-standing low c…	n/a	n/a	n/a
33.1	Samuel 2008	Hutchinson 2015	Multiple baseline case study	Social	Capacity	nr	nr	nr	nr	4	4	0	0	n/a	ID	PMID	0	23-56 years	UK	support for social participation (e.g., social prescribing, loneliness intervention)	Intensive Interaction support/interventions	Intensive Interaction support/interventions	Intensive interaction for social/communication behaviours	no CG	Residential/home	n/a	Individual	face-to-face	Staff	residential care staff	Segregated (only for ppl with disability)	yes	no	no	no	no	5 sessions per week for 12 weeks	nr		nr	nr	half day of training	residential care staff	nr	social behaviour	Participants – increase in visual scanning, looking at face, engagement, joint focus, initiating social contact. Staff – increase in use of mirroring vocalization and movement and contingent responding. Completion of reflective logs declined over time. Data from the questionnaire were most often coded as: Team cohesion Benefits for staff: Only 3 of 58 observer and practitioner comments included ‘…	n/a	n/a	n/a
33.1	zeedyk 2009a, b	Hutchinson 2015	Case study (not multiple baseline)	Social	Capacity	nr	nr	nr	nr	10	10	0	0	n/a	ID	sev nr	60	"late teens to early 60s"	UK	support for social participation (e.g., social prescribing, loneliness intervention)	Intensive Interaction support/interventions	Intensive Interaction support/interventions	Intensive interaction for social/communication behaviours	no CG	Residential/home	residential centre, day centre or at home		face-to-face	Clinician	experienced II practitioner	Segregated (only for ppl with disability)	yes	no	no	no	no	nr	nr		nr	nr	nr	experienced practitioner	nr	engagement behaviours	Of 37 measures of engagement, 5 did not show an increase. At least some variables increased for all individuals, 70% increased on all variables. Some increases in engagement occurred within 3 min	n/a	n/a	n/a
33.1	Forster 2006	Hutchinson 2015	Qualitative: other	Social	Capacity	nr	nr	nr	nr	1	1	0	0	n/a	ID	PMID	100	"young adult"	Australia	support for social participation (e.g., social prescribing, loneliness intervention)	Intensive Interaction support/interventions	Intensive Interaction support/interventions	Intensive interaction for social/communication behaviours	no CG	Residential/home			face-to-face	Staff	DSW	Segregated (only for ppl with disability)	yes	no	no	no	no	daily interactions, duration nr	15m to 2 hr per session		nr	nr	training: 2 hours	nr	nr	social behaviour	Videos showed positive regard for Cameron & engagement in techniques, new skill and location of interactions. Reflective logs: shift to seeing behaviour as communicative. Triple C: Cameron’s communicative skills increased. Themes from interviews: Development of techniques and skills, use of teamwork, seeing things from Cameron’s perspective, positive perspective on II decrease in negatively perce…	n/a	n/a	n/a
33.2	Koegel 2016	Pallathra 2019, Lorenc 2018	NRCT-No control	Social	Capacity	nr	nr	nr	nr	3	3	0	nr	nr	ASD	ASD without ID	100	m=21	USA	social skills/ communication training	communication skills training w video feedback	communication skills training w video feedback	no further description	No CG	not reported	n/a	Not clear	face-to-face	not clear	not clearly described	Segregated (only for ppl with disability)	not clear	not clear	not clear	not clear	not clear	5-9 weeks	40 mins per week	see description	nr	video/computer	nr	nr	nr	1. Empathic listening statements (observer) 2. empathic questions (observer) 3. empathy quotient empathic listening statements (self-report) 4. empathic questions (self report)	1. increased (stats nr, ns) 2. increased (stats nr, ns) 3. increased (stats nr, ns) 4. increased (stats nr, ns)	Socialisation satisfaction/confidence	increased (stats nr, ns)	n/a
33.2	Mason 2012	Pallathra 2019	Multiple baseline case study	Social	Capacity	nr	nr	nr	nr	2	2	0	nr	n/a	ASD	severity nr	nr	nr	nr	social skills/ communication training	Conversation skills	Conversation skills	training specific aspects of conversation: maintenance of reciprocal conversation	no CG	not reported	not described	Group (>2 people)	face-to-face	not clear	not clearly described	Segregated (only for ppl with disability)	yes	no	no	no	no	twice a week for 5 weeks	50 minutes per session	see description	nr	nr	nr	nr	nr	results not reported	results not reported	results not reported	results not reported	results not reported
33.2	Trepagnier 2011	Pallathra 2019	NRCT-No control	Social	Capacity	nr	nr	nr	nr	16	16	0	nr	n/a	ASD	severity nr	nr	nr	nr	social skills/ communication training	Social functioning (intervention not defined)	Conversation skills	training specific aspects of conversation: maintenance of reciprocal conversation	no CG	not reported	not described	Individual	computer based	not clear	not clearly described	Segregated (only for ppl with disability)	no	no	no	no	no	2 sessions in 2 weeks	nr	see description	nr	nr	nr	nr	nr	results not reported	results not reported	results not reported	results not reported	results not reported
33.2	Koegel 2015	Pallathra 2019	Multiple baseline case study	Social	Capacity	nr	nr	nr	nr	5	5	0	nr	nr	ASD	severity not reported	nr	nr	USA	social skills/ communication training	communication skills training w video feedback	communication skills training w video feedback	training specific aspects of conversation: reducing use of negative statements	No CG	not reported	n/a	Individual	face-to-face	not clear	not clearly described	Segregated (only for ppl with disability)	no	no	no	no	no	4-8 weeks	10 minutes per week	see description	nr	video/computer	nr	nr	nr	results not reported	results not reported	results not reported	results not reported	results not reported
33.2	Palmen 2008	Pallathra 2019, Palmen 2012	Multiple baseline case study	Social	Capacity	nr	nr	nr	nr	9	9	0	nr	n/a	ASD	ASD w verbal IQ 82-131	77.7778	17-25 years	nr	social skills/ communication training	Communication skill training	Communication Skill Training	Behavioural Skill Training of communication skills (question asking during tutorial conversations): concept instruction, task analyses, response discrimination, modeling, descriptive feedback, role-play and (self-) instruction using a flowchart, specific praise, corrective feedback using least to most prompting, table game, and rewards; tutorial conversations as in baseline	baseline: silence prompts during tutorial conversations	Post-secondary school education	day or clinical treatment setting	Group (>2 people)	face-to-face	not clear	not clearly described	Segregated (only for ppl with disability)	yes	not clear	no	no	no	1 session per week for 6 weeks (3 weeks in Pallathra SR)	50 minutes per session	see description	nr	nr	nr	nr	nr	Asking correct questions	improvement (stats nr)	n/a	n/a	n/a
33.2	Sperry 2005	Tobin 2014	Qualitative: focus groups	Social	Capacity	nr	nr	nr	nr	18	18	0	nr	n/a	ASD	severity nr	94.4	m=34	USA	social skills/ communication training	TEACCH-based social skills/ communication training targeting negative problem behaviour	TEACCH-based social skills/ communication training targeting negative problem behaviour	ongoing social groups based on the TEACCH model that met to support the development of social skills by providing opportunities for naturalistic social skills practice and helping members use social problem solving to answer social questions	no CG	not reported	not described	Group (>2 people)	face-to-face	not clear	not described	Segregated (only for ppl with disability)	yes	no	no	no	no	nr	nr	see description	nr	nr	nr	nr	nr	n/a	n/a	topics of importance to participants	participants identified several important content areas including managing personal relationships at work and in the community as well as accessing support as an individual with ASD.	n/a
33.2	Samuels 2012	Bundock 2017	Multiple baseline case study	Social	Capacity	nr	nr	people in supported residential setting	nr	4	4	0	nr	n/a	ASD & ID	ASD with ID	100	17-32 years	nr	social skills/ communication training	social stories targeting negative inappropriate social behaviours	social stories targeting negative inappropriate social behaviours	Social stories explain confusing social situations through text and/or visual support (Gray, 2010). Researchers used a baseline phase (two weeks before introducing the story), intervention phase, fading phase (reduced frequency of story for two weeks), and one month follow up. All target behaviours showed positive change during at least one phase of the study.	Baseline phase before introducing stories	Residential/home	supported residential setting	Individual	face-to-face	not clear	not described	Segregated (only for ppl with disability)	not clear	not clear	not clear	not clear	not clear	2 weeks intervention, 2 weeks fading (no sessions nr)	session length nr	see description	nr	social stories	nr	nr	nr	1. Quantitative (when story had been read, incidents of target behaviour, observations from support staff) 2. Qualitative data -informally collected	Positive impact of social stories to reduce problematic behaviours, however there was a return to almost baseline levels for most behaviour observed Participant a-d individual findings: (a) 0 recorded greetings at baseline increased to 3 at fading phase (b) Total of 93 incidents at baseline for inappropriate language reduced during fading phase including 7 days of no incidence of behaviour (c) To…	n/a	n/a	n/a
34.1	Newey 2002	Lorenc 2018	NRCT-No control	Social	Capacity and participation	nr	nr	nr	nr	5	5	0	nr	nr	ASD	ASD without ID	100	nr	UK	social skills/ communication training	communication skills training	communication skills training	Teaching theory of mind using discussion, modelling and homework	no CG	not reported	n/a	Not clear	not clear	not clear	not clearly described	Segregated (only for ppl with disability)	not clear	not clear	not clear	not clear	not clear	nr	nr	see description	nr	nr	nr	nr	nr	Symptom checklist 90: 1. anxiety domain 2. interpersonal sensitivity domain 3. phobic anxiety domain Other: 4. psychopathology related to social functioning	All not calculable/reported in SR	social contacts	not calculable/reported in SR	n/a
34.1	Bölte 2002	Pallathra 2019	RCT/quasi-RCT	Social	Capacity	nr	nr	nr	nr	10	5	5	nr	nr	ASD	severity nr	nr	nr	nr	social skills/ communication training	Social functioning (intervention not defined)	Social cognition computerised training	computer-based program to address emotion recognition/inference	not described	not reported	not described	Individual	computer based	not clear	not clearly described	Segregated (only for ppl with disability)	no	no	no	no	no	5 weeks	2 hours per week	see description	nr	computer	nr	nr	nr	results not reported	results not reported	results not reported	results not reported	results not reported
34.1	Golan 2006	Pallathra 2019	RCT/quasi-RCT	Social	Capacity	nr	nr	nr	nr	57 (31 Exp 1, 26 Exp 2)	19 exp 1, 13 exp 2	22 exp 1, 13 exp 2	nr	nr	ASD	severity nr	nr	nr	nr	social skills/ communication training	Social functioning (intervention not defined)	Social cognition computerised training	computer-based program to address emotion recognition/inference	not described	not reported	not described	Individual	computer based	not clear	not clearly described	Segregated (only for ppl with disability)	no	no	no	no	no	10 weeks	2 hours per week	see description	nr	computer	nr	nr	nr	results not reported	results not reported	results not reported	results not reported	results not reported
34.1	Saban-Bezalel 2015	Pallathra 2019	RCT/quasi-RCT	Social	Capacity	nr	nr	nr	nr	51	16	13 ASD, 22 TDC (not defined)	nr	nr	ASD	severity nr	nr	nr	nr	social skills/ communication training	Social comprehension training	Social comprehension training	short-term intervention in enhancing the comprehension of irony. included video clips, short stories, and comic strips to teach the recognition of ironic expression and was effective in improving comprehension of irony as well as modifying the pattern of hemispheric processing of irony in the brain.	no CG	not reported	not described	Individual and group	face-to-face	not clear	not clearly described	Segregated (only for ppl with disability)	yes	no	no	no	no	5 weeks	30-45 mins per week	see description	nr	computer	nr	nr	nr	results not reported	results not reported	results not reported	results not reported	results not reported
34.1	Faja 2008	Pallathra 2019	RCT/quasi-RCT	Social	Capacity	nr	nr	nr	nr	10	5	5	nr	nr	ASD	severity nr	nr	nr	nr	social skills/ communication training	STAART - face expertise training program	STAART - face expertise training program	as per Faja 2012	not described	not reported	not described	Individual	computer based	not clear	not clearly described	Segregated (only for ppl with disability)	no	no	no	no	no	8 sessions	30-60 minutes per session	see Faja 2012	nr	computer	nr	nr	nr	face processing	the test group and control group significantly improved after training, while in one study, the test group showed significantly greater sensitivity to certain stimuli than the control group	n/a	n/a	n/a
34.1	Faja 2012	Pallathra 2019	NRCT-No control	Social	Capacity	nr	nr	nr	nr	13	13	0	nr	n/a	ASD	severity nr	nr	nr	nr	social skills/ communication training	STAART - face expertise training program	STAART - face expertise training program	Face recognition was targeted by two studies and used a combination of explicit rule-based instruction and practice labeling characteristics of faces vs. objects	no CG	not reported	not described	Individual	computer based	not clear	not clearly described	Segregated (only for ppl with disability)	no	no	no	no	no	5-8 sessions	nr	see description	nr	computer	nr	nr	nr	face processing	face processing ability and strategies can be significantly improved through training... however, self-report measures of training experiences revealed that 64% of participants reported no change in social functioning	n/a	n/a	n/a
34.2	Mazza 2010	Grant 2017	RCT/quasi-RCT	Social	Capacity	outpatients	nr	nr	nr	33	17	16	0	0	PD	schizophrenia	59	m=24.4, m=24.7	nr	social skills/ communication training	Emotion and Theory of Mind Imitating Training (ETIT)	Emotion and Theory of Mind Imitating Training (ETIT)	not described	problem solving group	Clinical - outpatient	not described	Not clear	not clear	not clear	not clearly described	Segregated (only for ppl with disability)	not clear	not clear	not clear	not clear	not clear	12 weeks, 2 sessions per week	50 minutes per session	emotion and theory of mind imitation training	nr	nr	nr	nr	nr	theory of mind affect recognition	positive effects (stats nr) positive effects (stats nr)	Personal and Social Performance Scales	positive effects (stats nr)	n/a
34.2	Bechi 2013	Grant 2017	RCT/quasi-RCT	Social	Capacity	outpatients	nr	nr	nr	30	19	11	0	0	PD	schizophrenia	46.7	m=37.7	nr	social skills/ communication training	Theory of mind intervention Theory of mind intervention and Social Cognitive Training Group	Theory of Mind Intervention	not described	active control (newspaper discussion group)	Clinical - outpatient	not described	Not clear	not clear	not clear	not clearly described	Segregated (only for ppl with disability)	not clear	not clear	not clear	not clear	not clear	18 weeks, twice per week	1 hour per session	theory of mind	nr	nr	nr	nr	nr	theory of mind	positive effects (stats nr)	n/a	n/a	n/a
34.2	Habel 2010	Grant 2017	RCT/quasi-RCT	Social	Capacity	inpatient and outpatients	nr	nr	nr	20	10	10	4	2	PD	schizophrenia - forensic	100	m=31.4, m=33.7	nr	social skills/ communication training	training in affect recognition (TAR)	training in affect recognition (TAR)	not described	TAU (also a CG of healthy controls, but haven't extracted data on them)	not reported	n/a	Not clear	not clear	not clear	not clearly described	Segregated (only for ppl with disability)	not clear	not clear	not clear	not clear	not clear	12 sessions	45 minutes per session	not described	nr	nr	nr	nr	nr	affect recognition	positive effect (stats nr)	n/a	n/a	n/a
34.2	Wolwer 2005	Grant 2017	RCT/quasi-RCT	Social	Capacity	inpatients and outpatients	nr	nr	nr	77	52	25	24 dropouts - nr if IGs or CG	nr	PD	schizophrenia	78.0779	m=31.5, m=24, m=25	nr	social skills/ communication training	Training in affect recognition (TAR)	IG1: Training in affect recognition (TAR) IG2: Cognitive Remediation Therapy (CRT)	not described	TAU	not reported	not described	Not clear	not clear	not clear	not clearly described	Segregated (only for ppl with disability)	not clear	not clear	not clear	not clear	not clear	12 sessions	nr	training in affect recognition	nr	nr	nr	nr	nr	affect recognition	positive effects (stats nr)	n/a	n/a	n/a
34.2	Wolwer 2011	Grant 2017	RCT/quasi-RCT	Social	Capacity	inpatients	nr	nr	nr	38	20	18	5	3	PD	schizophrenia	68	m=36.7	nr	social skills/ communication training	Training in affect recognition (TAR)	Training in affect recognition (TAR)	not described	Cognitive remediation therapy	Clinical - inpatient	not described	Not clear	not clear	not clear	not clearly described	Segregated (only for ppl with disability)	not clear	not clear	not clear	not clear	not clear	12 sessions	45-60 minutes per session	training in affect recognition	nr	nr	nr	nr	nr	theory of mind social perception knowledge	positive effects (stats nr) positive effects (stats nr)	Social and Occupational Functioning Scale	positive effects (stats nr)	n/a
34.2	Sachs 2012	Grant 2017	RCT/quasi-RCT	Social	Capacity	inpatients and outpatients	nr	nr	nr	38	20	18	0	2	PD	schizophrenia	50.5263	m=27.2, m=31.7	nr	social skills/ communication training	Training in affect recognition (TAR)	Training in affect recognition (TAR)	training in affect recognition	TAU	Clinical - in/outpatient not clear	not described	Not clear	not clear	not clear	not clearly described	Segregated (only for ppl with disability)	not clear	not clear	not clear	not clear	not clear	12 sessions over 6 weeks	nr	training in affect recognition	nr	nr	nr	nr	nr	affect recognition	positive effects (stats nr)	n/a	n/a	n/a
34.2	Combs 2008	Grant 2017	RCT/quasi-RCT	Social	Capacity	inpatients	nr	nr	nr	60	20	20	nr	nr	PD	schizophrenia	65	m=38.7	nr	social skills/ communication training	Emotion Perception Intervention	Emotion Perception Intervention	based on attention or monetary incentive for AR (not defined)	FEIT (not defined)	Clinical - inpatient	not described	Not clear	not clear	not clear	not clearly described	Segregated (only for ppl with disability)	not clear	not clear	not clear	not clear	not clear	nr	nr	not described	nr	nr	nr	nr	nr	affect recognition	positive effects (stats nr)	n/a	n/a	n/a
34.2	Corrigan 1995	Grant 2017	RCT/quasi-RCT	Social	Capacity	inpatient and outpatient	nr	nr	nr	40	20	20	n/a	n/a	PD	schizophrenia	45	m=35.9, m=34.7	nr	social skills/ communication training	Vigilance for social perception training	Vigilance for social perception training	not described	vigilance training only	Clinical - in/outpatient not clear	not described	Not clear	not clear	not clear	not clearly described	Segregated (only for ppl with disability)	not clear	not clear	not clear	not clear	not clear	1 session	1 hour	vigilance plus memory training for social perception (self-instruction, salient cues, repeated practice)	nr	nr	nr	nr	nr	social perception knowledge	no effect (stats nr)	n/a	n/a	n/a
34.2	Popova 2014	Grant 2017	RCT/quasi-RCT	Social	Capacity	inpatients	nr	nr	nr	80	29	51	10	13	PD	schizophrenia	66	m=37	nr	social skills/ communication training	Facial affect recognition training	Facial affect recognition training	training in affect recognition and working memory	CG1: cognitive enhancement standardised program CG2: TAU	Clinical - inpatient	not described	Not clear	not clear	not clear	not clearly described	Segregated (only for ppl with disability)	not clear	not clear	not clear	not clear	not clear	20 sessions, daily over four weeks	1 hour per session	training in affect recognition and working memory	nr	nr	nr	nr	nr	affect recognition	positive effects (stats nr)	n/a	n/a	n/a
34.2	Penn 2000	Grant 2017	RCT/quasi-RCT	Social	Capacity	community	nr	nr	nr	40	31	9	n/a	n/a	PD	schizophrenia	58	m=39.8	nr	social skills/ communication training	Facial affect recognition training	Facial affect recognition training using three active conditions: IG1: monetary reinforcement IG2: facial feedback IG3: combination of reinforcement and facial feedback	not described	repeated practice without feedback	not reported	not described	Not clear	not clear	not clear	not clearly described	Segregated (only for ppl with disability)	not clear	not clear	not clear	not clear	not clear	nr	nr	nr	nr	nr	nr	nr	nr	affect recognition	positive effects (stats nr)	n/a	n/a	n/a
34.2	Russell 2008	Grant 2017	RCT/quasi-RCT	Social	Capacity	outpatients	nr	nr	nr	39	26	13	0	1	PD	schizophrenia	65.325	m=40, m=44	nr	social skills/ communication training	Micro-expression training tool (METT)	Micro-expression training tool (METT)	Facial affect recognition training	repeated exposure	Clinical - outpatient	not described	Not clear	not clear	not clear	not clearly described	Segregated (only for ppl with disability)	not clear	not clear	not clear	not clear	not clear	nr	nr	nr	nr	nr	nr	nr	nr	affect recognition	positive effects (stats nr)	n/a	n/a	n/a
35	Morrow-Howell 1998	Masi 2011	RCT/quasi-RCT	Social	Participation	Older U.S. adults in the St. Louis area who either called a suicide crisis hotline or were referred from family members, friends, or professionals because of depression, social isolation, or unmet needs in activities of daily living	nr	suicide helpline or referred from family, friends or professionals	nr	61	nr	nr	nr	nr	PD	suicidal, depressed or isolated	15	61-92 years, m=76	USA	support for social participation (e.g., social prescribing)	loneliness ints- community dwelling w SMI loneliness ints- psych disruption > traumatic birth experience loneliness ints- adults w physical/MH probs living alone loneliness ints- depressed/traumatised seniors loneliness ints- undergrads w moderate depression on BDI loneliness ints- older adults w suicidal ideation, depression, isolation loneliness ints- naval treinees w BDI > 30 or at-risk stress	Social support via telehealth	Social worker made weekly telephone calls to administer three components of the program, multidimensional psychosocial evaluation, assistance with social services, and supportive therapy, through which the social worker encouraged the client to articulate problems, explore possible solutions, and take action.	No intervention	not reported	not clearly described	Individual	telehealth	Clinician	social worker	Segregated (only for ppl with disability)	no	no	no	no	no	Median 8 months long	nr	see description	nr	nr	nr	social worker	nr	n/a	n/a	Older Americans Resources and Services Social Resource Rating Scale regarding loneliness frequency	Effect size: -0.09 (95%CI: -0.59, 0.41) - ns	n/a
35	Pijnenborg 2010	Naslund 2015	NRCT	Social and community	Capacity and participation	nr	nr	nr	nr	62	nr	nr	nr	nr	PD	Schizophrenia/Schizoaffective disorder; psychotic disorder	nr	nr	Netherlands	clinical or health intervention	SMS intervention	Automated SMS text message prompts	Automated SMS text message prompts to support daily goals and functioning, including taking medication, attending mental health care appointments, or grocery shopping	waitlist	not reported	not described	Individual	telehealth	not clear	not clearly reported	Segregated (only for ppl with disability)	no	no	no	no	no	18 weeks, frequency nr	nr		nr	mobile phone for participants	nr	nr	nr	n/a	n/a	leisure activity participation	participating in leisure activities increased with prompts	* goals * keeping appointments * medication adherence
35	Granholm 2011	Naslund 2015	NRCT-No control	Social	Capacity	nr	nr	nr	nr	55	55	0	42	n/a	PD	Schizophrenia/Schizoaffective disorder	nr	nr	USA	clinical or health intervention	Mobile Assessment and Treatment of Schizophrenia (MATS) SMS intervention eHealth and mHealth interventions using SMS prompting	Mobile Assessment and Treatment of Schizophrenia (MATS) SMS intervention	Mobile Assessment and Treatment of Schizophrenia (MATS) SMS intervention targets medication adherence, socialization, or hallucinations and uses individualized messages with branching according to participant responses.	no CG	not reported	not described	Individual	telehealth	not clear	not clearly reported	Segregated (only for ppl with disability)	no	no	no	no	MATS team	12 weeks, frequency nr	nr		nr	mobile phone for participants	nr	nr	nr	n/a	n/a	social interactions	increases in social interactions	medications and hallucination severity
36	Pitkanen 2012	Puolakka 2019	RCT/quasi-RCT	Social	Quality of Life	Schizophrenia and related disorders, age 18-65	nr	acute psychiatric participants	nr	311	100	106 (treatment control) 105 (TAU)	nr	nr	PD	Schizophrenia and related disorders	100	nr	Finland	clinical or health intervention	group-based psychoeducation/patient education	Patient education	Computer based education with clinical nurse	Control 1: education with clinical nurse using written leaflets Control: TAU	Clinical - inpatient	Nine acute inpatient units in two psychiatric hospitals	Individual	face-to-face	Clinician	nurse	Segregated (only for ppl with disability)	no	no	no	no	no	5 sessions	30-40 minutes per session	Illness, Treatment, Well-being, Support and Patients' rights	nr	nr	nr	nr	nr	n/a	n/a	n/a	n/a	Quality of life (Quality of Life, Enjoyment and Satisfaction Questionnaire, short form)
36	Rotondi 2005	Ma 2020	RCT/quasi-RCT	Social	Participation	aged ≥ 14 with schizophrenia or schizoaffective disorder	nr	nr	nr	30	nr	nr	nr	nr	PD	schizophrenia or schizoaffective disorder	nr	>14 years	USA	social skills/ communication training	psychoeducation	psychoeducation	psychoeducation using telehealth, including online therapy groups, ask questions and receive answers, a library of previous questions, activities in the community, news items, and educational reading materials	TAU	Clinical - outpatient	In- and out-patient psychiatric care units and psychiatric rehabilitation centres in Pittsburgh, Pennsylvania (secondary care setting)	Group (>2 people)	telehealth	Clinician	facilitated by master of social work and PhD clinicians, they were all trained in the monitoring and management of web-based interventions	Segregated (only for ppl with disability)	yes	no	no	no	no	unclear	unclear	see description	nr	computer, internet access	trained to monitor and manage web-based interventions	social work clinician trainees/graduates	nr	n/a	n/a	informational support and emotional support subscales of the instrument that was developed by Krause and Markides 3 and 6m follow up	No significant between-group difference on perceived social support (F (1,27) = 3.79, p = 0.062)	n/a
36	Boevink 2016	Ma 2020	RCT/quasi-RCT	Social and community	Participation	adults w mental illness	nr	nr	nr	163	nr	nr	nr	nr	PD	mental illness	nr	nr	Netherlands	befriending/social interaction support	Supported socialisation	Supported socialisation: Toward Recovery, Empowerment and Experiential Expertise (TREE)	TREE model: (1) Training course ‘start with recovery’, (2) Developing strength, (3) A one-day recovery training course	TAU	Clinical - outpatient	Mental health care organisations (community treatment team and sheltered housing organisations) in the Netherlands (secondary care setting)	Group (>2 people)	face-to-face	Multiple	The recovery self-help working groups were facilitated by two senior peer workers, and two mental health care managers facilitated the training course	Segregated (only for ppl with disability)	yes	no	no	no	no	every two weeks for 104 weeks (early starters) or 52 weeks (late starters)	2 hours	see description	nr	nr	nr	peers and mental health care managers	nr	n/a	n/a	Subjective social isolation outcome: the De Jong- Gierveld Loneliness Scale	No between-group difference in loneliness, 95% CI (− 0.31, 0.30) (effect size linear tread B = − 0.053, p = 0.98), standardised effect size was − 0.001 for each year of exposure to TREE programme. Measured at 12 and 24m	quality of Life; psychiatric symptoms
36	Aho-Mustomen 2011	Puolakka 2019	RCT/quasi-RCT	Social	Quality of Life	Schizophrenia forensic patients	nr	nr	nr	39	19	20	nr	nr	PD	Schizophrenia forensic patients	89.7436	m=38.6, m=40.6	Finland	clinical or health intervention	group-based psychoeducation/patient education	psychoeducation programme in inpatient forensic psychiatry unit	Eight group sessions with 3-8 patients per group, held once a week that contained cognitive behavioural elements and homework between group sessions plus TAU (medication, psychosocial rehabilitation efforts and usual ward activities)	TAU	Clinical - inpatient	n/a	Individual and group	face-to-face	Clinician	not clearly reported	Segregated (only for ppl with disability)	yes	no	no	no	no	8 (1 session each week for 8 weeks)	45-60 minutes per session	cognitive behavioural elements - not further defined	nr	nr	nr	nr	nr	n/a	n/a	n/a	n/a	Quality of life (15D)
36	Vreeland 2006	Puolakka 2019	RCT/quasi-RCT	Social	Quality of Life	Schizophrenia/Schizoaffective disorder	nr	nr	nr	74	40	34	nr	nr	PD	Schizophrenia/Schizoaffective disorder	44.5946	nr	USA	clinical or health intervention	group-based psychoeducation/patient education	Team Solutions Treatment Model	a comprehensive, modularized, psychoeducational programme	TAU	Clinical - outpatient	day treatment centre	Group (>2 people)	face-to-face	Clinician	not clearly reported	Segregated (only for ppl with disability)	yes	no	no	no	no	48 (2 sessions each week for 24 weeks)	nr	Sessions offered information and exercises about schizophrenia, recovering from it, medication and preventing relapses	nr	nr	nr	nr	nr	n/a	n/a	n/a	n/a	Psychological general wellbeing scale - total score and self-concept scale
36	Walker 2013	Puolakka 2019	RCT/quasi-RCT	Social	Quality of Life	psychotic disorder, age 19-65	nr	nr	nr	81	40	34	nr	nr	PD	psychotic disorder	90.1235	m=38, m=35	UK	clinical or health intervention	group-based psychoeducation/patient education	group-based psychoeducation programme	A combination of information giving sessions as well as problem solving and coping skills session. Encouraged to become involved in open discussion during each session and were issued with information re_x0002_lating to the session and supplementary reading material at the close of each session.	TAU (incl social and occupational activities)	Clinical - inpatient	four forensic centres	Group (>2 people)	face-to-face	Clinician	not clearly reported	Segregated (only for ppl with disability)	yes	no	no	no	no	22 (2 sessions each week for 11 weeks)	2 hr per session	problem solving and coping skills	nr	nr	nr	nr	nr	n/a	n/a	n/a	n/a	Schizophrenia Quality of Life Scale Revision 4
36	Haslam 2016	Webber 2017	NRCT	Social	Capacity	nr	nr	nr	nr	nr	nr	nr	nr	nr	PD	depression or anxiety	nr	young adults	nr	clinical or health intervention	Groups for health	Groups for health - psychoeducation	Five manualised sessions of 60–75 min that aim to build social connectedness by strengthening group-based social identifications. Sessions focused on beneficial effects of social group memberships on health; group-based resources; identifying and strengthening valued social identities; establishing and embedding new social group connections; and sustaining social identities	not described	not reported	not clear	Group (>2 people)	face-to-face	not clear	not described	Not clear	not clear	not clear	not clear	not clear	not clear	5 sessions	60-75 minutes per session	see description	nr	nr	nr	nr	nr	n/a	n/a	loneliness and social functioning	Intervention group reduced loneliness and increased social functioning at the end of the programme, but these outcomes were not measured in the control group	n/a
36	Atkinson 1996	Ma 2020	RCT/quasi-RCT	Social	Participation	registered patients with schizophrenia	nr	nr	nr	146	nr	nr	nr	nr	PD	schizophrenia	nr	nr	Scotland	social skills/ communication training	psychoeducation	psychoeducation	psychoeducation sessions that generally covered schizophrenia topics, and alternated between an information session and a problem-solving session	waitlist	Clinical - outpatient	Community clinic, South Glasgow, UK	Group (>2 people)	face-to-face	Clinician	Led by community psychiatric nurses, occupational therapists and registrars. Trainings were also provided	Segregated (only for ppl with disability)	yes	no	no	no	no	20 weeks (not clear how many sessions)	1.5 per session	see description	nr	nr	training provided (not defined)	psychiatric nurses, occupational therapists and registrars	nr	n/a	n/a	social contacts (number) using A modified Social Network Schedule (SNS)	Significant between-group difference in the total number of contacts after the intervention (t = 4.4, p < 0.001) and at follow-up (t = 3.6, p < 0.001).	(1) Quality of life (2) Psychiatric symptoms (3) Overall functioning
36	Hesselmark 2014	Pallathra 2019, Lorenc 2018	RCT/quasi-RCT	Social	Capacity	nr	nr	nr	nr	68	34	34	nr	nr	ASD	ASD with psychiatric comorbidities, without ID	55	m=32	Sweden	clinical or health intervention	Group CBT and psychoeducation	Group CBT and psychoeducation	not described	unstructured recreation activity	not reported	not clearly described	Group (>2 people)	face-to-face	Clinician	not clearly reported	Segregated (only for ppl with disability)	yes	no	no	no	no	36 weeks	3h per week	nr	nr	nr	nr	nr	nr	n/a	n/a	n/a	n/a	QoL inventory Sense of Coherence scale Rosenberg Self-Esteem Scale Symptom checklist 90 AQ BDI Adult ADHD self reportcale Clinical global impression scale-severity
37	Kiep 2014	Pallathra 2019	NRCT-No control	Social	Capacity	nr	nr	nr	nr	50	50	0	nr	n/a	ASD	severity not reported	nr	nr	nr	clinical or health intervention	CBT and/or Mindfulness	Mindfulness-Based Therapy	not described, but targeted anxiety	no CG	not reported	not clearly described	Group (>2 people)	face-to-face	Clinician	not clearly reported	Segregated (only for ppl with disability)	yes	no	no	no	no	9 weeks	2.5 hrs p/week	nr	nr	nr	nr	nr	nr	n/a	n/a	agoraphobia	reduction in symptoms of agoraphobia	somatization
37	Spek 2013	Pallathra 2019	RCT/quasi-RCT	Social	Capacity	nr	nr	nr	nr	41	20	21	nr	n/a	ASD	severity not reported	nr	nr	nr	clinical or health intervention	CBT and/or Mindfulness	mindfulness-based therapy to target anxiety	not described, but targeted social anxiety	not described	not reported	not clearly described	Group (>2 people)	face-to-face	Clinician	not clearly reported	Segregated (only for ppl with disability)	yes	no	no	no	no	9 weeks	2.5 hrs p/week	nr	nr	nr	nr	nr	nr	n/a	n/a	n/a	n/a	anxiety and depression symptoms, positive affect and rumination
38	Mendelson 2013	Ma 2020	RCT/quasi-RCT	Social	Participation	pregnant/new mothers with a child <6m old with depression	nr	nr	nr	78	nr	nr	nr	nr	PD	Depression	0	14-41 years	USA	clinical or health intervention	cognitive therapy	(CBT concepts) Standard home visiting services + The Mother and Babies (MB) course	Intervention group: Sessions cover core cognitive behavioural concepts, including pleasant activities, thoughts, and contact with others	standard home visiting services + information on perinatal depression	Community	general population setting	Individual	face-to-face	Clinician	licensed clinical social worker or clinical psychologist	Segregated (only for ppl with disability)	no	no	no	no	no	6 weekly sessions	2 hrs per session	see description	nr	nr	nr	psychologist	nr	n/a	n/a	Subjective social isolation outcome: the Interpersonal Support Evaluation List (ISEL)	No significant between-group difference in perceived social support, β = 6.67, SE = 0.03, p < 0.10 (measured at end of treatment, 3m and 6m fu)	n/a
38	Sorenson 2003	Masi 2011	NRCT	Social	Capacity	women w significant psychological disruption after a traumatizing provider interaction during a birth experience not related to the baby’s physical outcome.	nr	recruited in conjunction with an International Cesarean Awareness Network (ICAN) state affiliate, ICAN referral agencies, and midwifery practices in a U.S. metropolitan	nr	9	nr	nr	nr	nr	PD	women w significant psychological disruption after a traumatizing provider interaction during a birth experience not related to the baby’s physical outcome.	0	26-45, m=33 years	USA	clinical or health intervention	social CBT	Social CBT	Cognitive behavioral therapy sessions. Group leader was a psychiatric mental health clinical nurse specialist who encouraged the development of positive interpersonal relationships and provided support to confront issues and develop new cognitive and relationship skills.	not described	Clinical - in/outpatient not clear	not clearly described	Group (>2 people)	face-to-face	Clinician	psychiatric mental health clinical nurse specialist	Segregated (only for ppl with disability)	yes	no	no	no	no	5 monthly sessions	4 hrs per session	see description	nr	nr	nr	psychiatric mental health clinical nurse specialist	nr	n/a	n/a	20-item UCLA Loneliness Scale	Effect size: -4.81 (95%CI: -7.09, -2.53)	n/a
38	Ekman 2015	Pallathra 2019	NRCT-No control	Social	Capacity	nr	nr	nr	nr	18	18	0	nr	n/a	ASD	severity not reported	nr	nr	nr	clinical or health intervention	CBT and/or Mindfulness	CBT with visualisation	CBT that incorporated visualization as a technique to illustrate the “invisible code of social interaction and communication”, but targeted social anxiety	no CG	not reported	not clearly described	Individual	face-to-face	Clinician	not clearly reported	Segregated (only for ppl with disability)	no	no	no	no	no	15 sessions	45-60 mins per session	nr	nr	nr	nr	nr	nr	results not reported	results not reported and not included in reference in ref list	results not reported and not included in reference in ref list	results not reported and not included in reference in ref list	results not reported and not included in reference in ref list
38	Sizoo 2017	Pallathra 2019	RCT/quasi-RCT	Social	Capacity	nr	nr	nr	nr	59	27	32	nr	nr	ASD	severity not reported	nr	nr	nr	clinical or health intervention	CBT and/or Mindfulness	CBT	not described, but targeted social anxiety	Mindfulness-based Stress reduction	not reported	not clearly described	Group (>2 people)	face-to-face	Clinician	not clearly reported	Segregated (only for ppl with disability)	yes	no	no	no	no	13 weeks	1.5 hrs per week	nr	nr	nr	nr	nr	nr	n/a	n/a	n/a	n/a	anxiety and depression symptoms
38	Spain 2017	Pallathra 2019	NRCT-No control	Social	Capacity	nr	nr	nr	nr	14	14	0	nr	n/a	ASD	severity not reported	nr	nr	nr	clinical or health intervention	CBT and/or Mindfulness	Group CBT	a combination of social skills training and CBT techniques in order to target concurrent social anxiety	no CG	not reported	not clearly described	Group (>2 people)	face-to-face	Clinician	not clearly reported	Segregated (only for ppl with disability)	yes	no	no	no	no	11 weeks	2 hrs p/week	nr	nr	nr	nr	nr	nr	results not reported	results not reported and not included in reference in ref list	results not reported and not included in reference in ref list	results not reported and not included in reference in ref list	results not reported and not included in reference in ref list
38	McGillivray 2014	Pallathra 2019	RCT/quasi-RCT	Social	Capacity	nr	nr	nr	nr	32	26	16	nr	nr	ASD	severity nr	nr	nr	nr	clinical or health intervention	CBT-based program: Think Well, Feel Well and Be Well	CBT-based program: Think Well, Feel Well and Be Well	a "more traditional CBT intervention targeting depression and stress"	not described	not reported	not described	Individual and group	face-to-face	not clear	not clearly described	Segregated (only for ppl with disability)	yes	no	no	no	no	9 weeks	2 hours per week	see description	nr	nr	nr	nr	nr	n/a	n/a	n/a	n/a	not clear
38	Veltro 2011	Grant 2017	RCT/quasi-RCT	Social	Capacity	outpatients	nr	nr	nr	24	nr	nr	nr	nr	PD	schizophrenia	nr	m=38.8, m=37.7	nr	social skills/ communication training	Cognitive emotional rehabilitation	Cognitive emotional rehabilitation	not described further	Problem solving training	Clinical - outpatient	not described	Not clear	not clear	not clear	not clearly described	Segregated (only for ppl with disability)	not clear	not clear	not clear	not clear	not clear	24 sessions	1.5 hours per session	Cognitive emotional rehabilitation	nr	nr	nr	nr	nr	theory of mind affect recognition	positive effects (stats nr) positive effects (stats nr)	Personal and Social Performance Scale	positive effects (stats nr)	n/a
39	Conoley 1985	Ma 2020	RCT/quasi-RCT	Social	Participation	psychology undergraduate students with moderate depression	nr	nr	nr	57	nr	nr	nr	nr	PD	Moderate depression	0	nr	USA	clinical or health intervention	cognitive therapy	IG1: (cognitive) Reframing IG2: Self-control	Intervention groups: aimed to increase understanding in loneliness. First half of the session consisted of loneliness and reflective responses, the second half included either 3–5 positive reframing directives for reframing subjects, and self-control directives for self-control subjects	waitlist	Post-secondary school education	general population setting: University Psychology department	Individual	face-to-face	Clinician	Two male doctoral students with 3-year counselling experience, received training in both interventions	Segregated (only for ppl with disability)	no	no	no	no	no	2 sesssions one week apart	30 mins per session	see description	nr	nr	training received in the intervention	clinical psychology trainees with 3 years experience	nr	n/a	n/a	Subjective social isolation outcome: the Revised University of California Los Angeles (UCLA) Loneliness Scale; The Causal Dimension Scale	No significant treatment effect was found (F (2,108) = 0.60, p > 0.05) (outcomes measured at end of treatment and 2 weeks)	depressive symptoms
39	Interian 2016	Ma 2020	RCT/quasi-RCT	Social	Participation	veterans w PTSD	nr	nr	nr	103	nr	nr	nr	nr	PD	PTSD	nr	nr	USA	clinical or health intervention	cognitive therapy	psychoeducation & cognitive change, Family of Heroes	The Family of Heroes Intervention: provided psychoeducation and stimulated conversations regarding post-deployment stress and mental health treatment; and three conversation scenarios	"control"	Clinical - primary care	primary care setting	Individual	online	None	n/a	Segregated (only for ppl with disability)	no	no	no	no	no	one session	1 hr	see description	nr	computer/internet access	nr	nr	nr	n/a	n/a	The family subscale of the Multidimensional Scale for Perceived Social Support	Intervention group reported a higher chance of having a decreased perceived family support over time than the control group (p = 0.04) (outcome measured 2 months post-baseline)	n/a
39	van der Gaag 2002	Grant 2017	RCT/quasi-RCT	Social	Capacity	inpatients	nr	nr	nr	42	21	21	3 - nr if IG or CG	nr	PD	schizophrenia	50	m=30.4, m=31.7	nr	social skills/ communication training	psychoeducation/social skills training (e.g., SCIT, systematic desensitisation)	Cognitive remediation	not described	TAU	Clinical - inpatient	n/a	Not clear	not clear	Clinician	not clearly described	Segregated (only for ppl with disability)	not clear	not clear	not clear	not clear	not clear	22 sessions	nr	training on perception; reasoning, emotion perception and social situations	nr	nr	nr	nr	nr	theory of mind	positive effect (stats nr)	n/a	n/a	n/a
39	Peyroux 2016	Fernandez-Sotos 2020	NRCT-No control	Social	Capacity	nr	nr	nr	nr	2	2	0	nr	n/a	PD	schizophrenia	nr	nr	nr	social skills/ communication training	RC2S: Cognitive remediation of social cognition in schizophrenia	RC2S: Cognitive remediation of social cognition in schizophrenia	a comprehensive, individualized social cognitive remediation program that includes paper and pencil tasks and computerized exercises. Each session is divided into four parts. The first includes paper-and-pencil tasks for the patient to develop strategies to analyse social situations, focusing first on basic social cognitive processes and then on higher order social cognitive functions. The sec_x0…	no CG	Clinical - in/outpatient not clear	not described	Individual	face-to-face	not clear	not described	Segregated (only for ppl with disability)	no	no	no	no	no	14 X 1 hr sessions, "30 to 2 hours duration per week"	up to 2 hours per week	see description	nr	computer/VR	nr	nr	nr	Facial emotion recognition: TREF, Theory of Mind: MASC-VF, TOM-15, RMET Attribution style: AIHQ Social perception and knowledge: PerSoa Empathy: EQ, QCAE	Improvement in the targeted social cognitive processes (stats nr)	n/a	n/a	Psychopathology: PANSS Daily functioning: SERS, WEMWBS, EAS
40	Eack 2009	Grant 2017	RCT/quasi-RCT	Social	Capacity	inpatients and outpatients, not otherwise specified	nr	nr	nr	58	31	27	21 - nr if IG or CG	nr	PD	schizophrenia	69	m=26.0	nr	clinical or health intervention	Cognitive Enhancement Therapy	Cognitive Enhancement Therapy including social cognitive therapy	not described	Enriched Supportive Therapy, including individual psychoeducation and relapse prevention sessions	Clinical - in/outpatient not clear	not clearly described	Not clear	not clear	Clinician	not clearly reported	Segregated (only for ppl with disability)	not clear	not clear	not clear	not clear	not clear	45 sessions over two years	1.5 hours per session	nr	nr	nr	nr	nr	nr	social cognition global composite score	postiive effect post-treatment and at 2 years (stats nr)	n/a	n/a	n/a
40	Eack 2015	Grant 2017	RCT/quasi-RCT	Social	Capacity	outpatients with substance misuse	nr	nr	nr	31	22	9	10	1	PD	schizophrenia	71	m=39.7, m=34.7	nr	clinical or health intervention	Cognitive Enhancement Therapy	Cognitive Enhancement Therapy	not described	TAU	Clinical - outpatient	not clearly described	Not clear	not clear	Clinician	not clearly reported	Segregated (only for ppl with disability)	not clear	not clear	not clear	not clear	not clear	45 sessions over two years	1.5 hours per session	nr	nr	nr	nr	nr	nr	theory of mind affect recognition	ns (stats nr) positive effect post-treatment (stats nr)	n/a	n/a	function (global assessment scale)
40	Choi 2006	Grant 2017	RCT/quasi-RCT	Social	Capacity	outpatients	nr	nr	nr	34	17	17	7	10	PD	schizophrenia	55.9	m=30.8, m=34.1	nr	social skills/ communication training	Social Cognition Enhancement Training	Social Cognition Enhancement Training	not described	standard psychiatric rehabilitation training (coping skills, medication adherence)		not described	Not clear	not clear	not clear	not clearly described	Segregated (only for ppl with disability)	not clear	not clear	not clear	not clear	not clear	36 sessions	1.5 hours per session	not described	nr	nr	nr	nr	nr	affect recognition social perception knowledge	no effects (stats nr) positive effects (stats nr)	n/a	n/a	n/a
40	Roncone 2004	Grant 2017	RCT/quasi-RCT	Social	Capacity	oupatients	nr	nr	nr	20	10	10	n/a	n/a	PD	schizophrenia	65	m=33.9, m=33.5	nr	social skills/ communication training	metacognitive training to change cognitive structure	metacognitive training to change cognitive structure	not described further	medication and supportive psychotherapy "where needed"	Clinical - outpatient	not described	Not clear	not clear	not clear	not clearly described	Segregated (only for ppl with disability)	not clear	not clear	not clear	not clear	not clear	nr	total 22 hours	training to change social cognitive structure	nr	nr	nr	nr	nr	theory of mind affect recognition	positive effects (stats nr) positive effects (stats nr)	n/a	n/a	DAS (Italian version)
40	Eack 2018	Pallathra 2019	RCT/quasi-RCT	Social	Capacity	nr	nr	nr	nr	54	21	19	nr	nr	ASD	severity not reported	nr	nr	USA	clinical or health intervention	Cognitive Enhancement Therapy	Cognitive Enhancement Therapy	as per Eack 2013	not described	not reported	not clearly described	Individual and group	computer based	Clinician	not clearly reported	Segregated (only for ppl with disability)	yes	no	no	no	no	18 months	1.5 hrs per week	nr	nr	nr	nr	nr	nr	n/a	n/a	n/a	n/a	employment
40	Eack 2013	Pallathra 2019, Lorenc 2018	NRCT-No control	Social	Capacity	nr	nr	nr	nr	14	14	0	nr	nr	ASD	ASD without ID	86	m=25	USA	clinical or health intervention	Cognitive Enhancement Therapy	Cognitive Enhancement Therapy	cognitive therapy intervention to treat general impairments in social and non-social information processing and problem solving, called Cognitive Enhancement Therapy (CET). CET combines computer-based neurocognitive training on improving cognition (e.g., processing speed, sustaining attention, increasing cognitive flexibility, managing frustration, etc.) with a structured social-cognitive group c…	no CG	not reported	not reported	Individual and group	computer based	Clinician	not clearly reported	Segregated (only for ppl with disability)	yes	no	no	no	no	18 months	60-75 minutes p/week	nr	nr	nr	nr	nr	nr	Cognitive style and social cognition: 1. vocational ineffectiveness domain 2. interpersonal ineffectiveness domain	1. positive effect (stats nr) 2. positive effect (stats nr) Significant levels of improvement in composite indices of all four cognitive and behavioral domains assessed (i.e., neurocognition, cognitive style, social cognition, and social adjustment)	n/a	n/a	n/a
41	Gawrysiak 2009	Ma 2020	RCT/quasi-RCT	Social	Participation	adults aged ≥ 18 with depression	nr	nr	nr	30	nr	nr	nr	nr	PD	depression	nr	nr	USA	clinical or health intervention	Behavioural activation	Behavioural Activation Treatment for Depression (BATD)	Psychoeducation, social skills training and supported socialisation. The BA intervention includes: education, assessments of values and goals, construct an activity hierarchy, selection of value-based behaviours, establish structured behavioural goals, and behavioural checkout form	no treatment	Post-secondary school education	A public Southeastern university, US	Individual	face-to-face	Clinician	One male doctoral students in clinical psychology was trained in BATD and conducted the individualised interview	Segregated (only for ppl with disability)	no	no	no	no	n/a	1 session	1.5 hours	see description	nr	nr	nr	clinical psychology trainee	nr	n/a	n/a	Subjective social isolation outcome: the MSPSS	No significant between-group difference in perceived social support (F (1,28) = 3.11, p = 0.08, d = 0.70) (measured at 2 weeks)	depressive symptoms; anxiety symptoms
41	O'Mahen 2014	Ma 2020	RCT/quasi-RCT	Social	Participation	aged > 18 w major depressive disorder (MDD)	nr	nr	nr	83	nr	nr	nr	nr	PD	major depressive disorder (MDD)	0	>18 years	UK	befriending/social interaction support	Psychoeducation and supported socialisation	NetmumsHWD: Psychoeducation and supported socialisation	NetmumsHWD: including a core behavioural activation (BA) model, a relapse prevention session, plus two optional modules. Also a chat room that was moderated by peer supporters, and weekly supported phone call from mental health workers	TAU	Clinical - outpatient	not described	Individual and group	online	Multiple	Mental health supporters with undergraduate degrees and 1 year of clinical qualification in psychological therapies Peer supporters had previous training in low-intensity BA, received 5 days of training in high-intensity perinatalspecific BA approach	Segregated (only for ppl with disability)	yes	no	no	no	peers	12-session treatment online course, weekly telephone support sessions	20–30 min for each telephone session	see description	nr	nr	Peers received training in low intensity BA and high intensity perinatal specific BA approach	Psychology and peers	nr	n/a	n/a	Subjective social isolation outcome: the Social Provision Scale	No significant between-group difference in perceived support between the intervention and control group (95% CI 1.02, − 0.02), medium effect size = 0.50 (p = 0.27) measured at end of treatment and 6m fu	depressive symptoms; anxiety symptoms
42	Garcia 2003	Grant 2017	RCT/quasi-RCT	Social	Capacity	community	nr	nr	nr	20	11	9	6	2	PD	schizophrenia	70	m=40.5, m=36.9	Spain	social skills/ communication training	Integrated Psychological Therapy for Schizophrenia (IPTS)	Integrated Psychological Therapy for Schizophrenia (IPTS)	not described	no training	not reported	not described	Not clear	not clear	not clear	not clearly described	Segregated (only for ppl with disability)	not clear	not clear	not clear	not clear	not clear	nr	nr	not described	nr	nr	nr	nr	nr	social perception knowledge	positive effects (stats nr)	n/a	n/a	n/a
42	Koekkoek 2012	Webber 2017, Newlin 2015 (not extracted)	NRCT	Social and community	Capacity and participation	nr	nr	nr	nr	36	20	16	nr	nr	PD	non-psychotic chronic mental health problems	30.5556	m=41, m=43	Netherlands	social skills/ communication training	Interpersonal Community Psychiatric Treatment (ICPT) - individual social skill training	Interpersonal Community Psychiatric Treatment (ICPT)	Delivered by community psychiatric nurses to decrease ineffective behaviours of both service users and professionals. ICPT actively engages service users in their treatment process, consisting of three stages: ‘alliance’ optimises the therapeutic alliance and relationship management; ‘refinement’ focuses on the development of treatment goals including the use of motivational interviewing; and ‘wo…	not described	Clinical - in/outpatient not clear	assume clinical b/c delivered by psych nurse	Individual	face-to-face	Clinician	community psychiatric nurses	Segregated (only for ppl with disability)	not clear	not clear	not clear	not clear	not clear	every 2 weeks	45 minutes per session	see description	nr	nr	nr	community psychiatric nurses	nr	n/a	n/a	social networks, social activity, goal setting	Significant increase in social networks. Participants used fewer services and became more socially active. Goal setting was universally perceived as helpful	n/a
43	Nieminen 2012, Ramon 2011	Webber 2017, Newlin 2015 (not extracted)	Qualitative: other	Community	Participation	nr	nr	nr	nr	nr	nr	nr	nr	nr	PD	enduring psychoses, schizophrenia or bipolar disorder	nr	nr	nr	vocation-focus	EMILIA project	EMILIA project	Used lifelong learning as a means of achieving social inclusion and paid employment. Occupational opportunities were created for mental health service users as trainers/educators, researchers/auditors and direct service providers in user-led services or mainstream services. Training packages, learning pathways, employment and support pathways were created. Training programmes were created in dual…	No CG	Vocational training/work setting	assume vocational, but not explicitly stated	Not clear	not clear	not clear	not clearly described	Not clear	not clear	not clear	not clear	not clear	not clear	nr	nr	see description	nr	nr	nr	nr	nr	n/a	n/a	social life, social contacts, networks	Most participants experienced improvement in their social life, social contacts and networks. However, maintaining social relationships was perceived to be difficult	n/a
43	Bio 2011	Puolakka 2019	RCT/quasi-RCT	Social	Quality of Life	schizophrenia, >= 18 years, unemployed in the past 12m	nr	nr	nr	112	57	55	nr	nr	PD	Schizophrenia	64.3	m=28.2, m=30.8	Brazil	vocation-focus	Vocational rehabilitation program in 42 companies	Vocational Rehabilitation Program	A 6-months internship in one of 42 companies that signed a partnership	Waitlist/TAU, including out-clinic follow-up treatment including regular consultations every 4–6 weeks.			Individual	face-to-face	not clear	not clearly described	Integrated (>=1 ppl without disability)	not clear	yes	no	no	yes	6-months	not "sessions"	internship, no other support/training components described	nr	nr	nr	nr	nr	n/a	n/a	n/a	n/a	Quality of Life Scale
43	Farrell 2009 (rvw w 12 papers)	Roche 2019	Systematic review	Social and community	Participation	adults w MH problems	nr	AMED, BNI, CINAL, Embase, King’s Fund, Medline, PsycInfo	nr	nr	nr	nr	nr	nr	PD	adults w MH problems	nr	nr	n/a	vocation-focus	Volunteer work	Voluntary work	Activity in which time is given freely and regularly to benefit another person, group or organisation, other than family or friends (Wilson 2000) Four main themes: volunteering and social inclusion (2 papers); volunteering for mental health (5 papers); volunteering and disability (5 papers); and volunteering and mental health problems (2 papers).	nr	Community	likely multiple settings	Individual	face-to-face	Multiple	various - not described	Integrated (>=1 ppl without disability)	yes	yes	no	no	no	n/a	n/a	see description	nr	nr	nr	nr	nr	n/a	n/a	social inclusion	Currently little evidence to support volunteering as a means for improving mental health and promoting social inclusion. Some reported benefits to social inclusion (e.g., social ties), and increased opportunities for social engagement among some of the benefits of participation in meaningful activity	mental health
44	Walsh 2018	Louw 2019	NRCT-No control	Social	Capacity and participation	nr	nr	nr	nr	7	7	0	nr	n/a	ID	severity nr	57.1429	19-22 years	Ireland	social skills/ communication training	Walker Social Skills curriculum (ACCESS program) -	Walker Social Skills curriculum (ACCESS program)	a social skills curriculum and video modelling to increase social communication, not further defined	no CG	Vocational training/work setting	not stated, but assume vocational setting?	Not clear	face-to-face	not clear	not clearly described	Not clear	not clear	not clear	not clear	not clear	not clear	nr	nr	see description	nr	video/computer	nr	nr	nr	Social skills and problem behaviour	Social skills training intervention enhanced overall social competence. As a result, problem behaviour decreased. Improvement found in peer‐related, adult‐related and selfrelated social skills for all participants	n/a	n/a	n/a
44	Gibson 2018	Louw 2019	Multiple baseline case study	Social	Capacity and participation	nr	nr	nr	nr	5	5	0	nr	n/a	ID	severity nr	40	18-21 years	USA	social skills/ communication training	social skill training: video‐based instruction ONEder App (SpecialNeedsWare, 2016) on the individualized employment‐related social behaviours (ERSB)	social skill training: video‐based instruction ONEder App (SpecialNeedsWare, 2016)	video instruction on the individualized employment‐related social behaviours (ERSB)	no CG	Vocational training/work setting	vocational setting	Individual	face-to-face	not clear	not clearly described	Not clear	not clear	not clear	not clear	not clear	not clear	nr	nr	see description	nr	video/computer	nr	nr	nr	n/a	n/a	self-initiated social interactions	In spite of concern previously noted, the frequency of self‐initiated social interactions was not suppressed in the absence of proximity of a support	task performance
44	Gilson 2016	Louw 2019	Multiple baseline case study	Social	Capacity and participation	nr	nr	nr	nr	3	3	0	nr	n/a	ID	severity nr	100	18-26 years	USA	social skills/ communication training	social skills/ communication training with covert coaching	social skills/ communication training with covert coaching	job‐coaching intervention package for participants who need explicit prompting to encourage social interactions.	no CG	Vocational training/work setting	vocational setting	Individual	covert	not clear	not clearly described	Integrated (>=1 ppl without disability)	no	yes	no	no	colleagues	nr	nr	see description	nr	equipment for covert communication	nr	nr	nr	n/a	n/a	social interactions	Social interactions increased, and engagement in tasks was maintained. Participants reported the intervention beneficial	n/a
45	Hillier 2007a (Focus on Autism and other Developmental Disabilities, doi: 10.1177/10883576070220020201)	Atkinson-Jones 2018, Pallathra 2019, Tobin 2014, Lorenc 2018	NRCT-No control	Social and community	Capacity and participation	people with ASD and psychiatric comorbidities	nr	nr	nr	13	13	0	nr	0	ASD	ASD with psychiatric comorbidities, but no ID	84.6	m=19	USA	social skills/ communication training	Aspirations (Hillier et al., 2007)	Aspirations (Hillier et al., 2007)	social and vocational skills program including education and supportive group discussion, assistance to find employment, on-site coaching support, follow up support for new problems or job changes, video taped role playing. Each session was based around a ‘‘hypothesized weakness in insight or understanding’’ including friendships and interpersonal problem-solving, social communication, and ToM (p…	no CG	Vocational training/work setting	n/a	Individual and group	face-to-face	not clear	the interventionists were not described	Both integrated and segregated	yes	yes	no	no	colleagues	Until participant reached independence in job position (ranging from 1 day to 6 months	4-20 hours per week	education and supportive group discussion, assistance to find employment, on-site coaching support, follow up support for new problems or job changes, video taped role playing	nr	nr	nr	nr	nr	empathy quotient	positive effects (stats nr; Lorenc) Only empathy improved post-intervention From Atkinson-Jones: improvements in participants’ interpersonal and expressive abilities on a clinician‐administered structural behavioural assessment.	index of peer relations (IPR)	positive effects (stats nr, but ns; Lorenc) Participants were observed to make significantly more contributions in the latter portion of the program compared to the beginning. Anecdotal reports also suggested the program was effective in increasing peer relations, and participants reported that they enjoyed meeting and interacting with others on the autism spectrum	skills
45	Hillier 2007b (Career Development for Exceptional Individuals; doi: 10.1177/08857288070300010501)	Lorenc 2018, Palmen 2012	NRCT-No control	Social and community	Capacity	nr	nr	nr	nr	9	9	0	nr	n/a	ASD	ASD without ID	88	m=22		social skills/ communication training	Individual support for employment (not Aspirations, though)	Individual support for employment (not Aspirations?)	individual support to find work, worksite evaluation, job coaching, ongoing support	no CG	Vocational training/work setting	not described	Individual	face-to-face	not clear	not described	Integrated (>=1 ppl without disability)	not clear	not clear	not clear	not clear	colleagues	Until participant reached independence in job position (ranging from 1 day to 6 months	4-20 hours per week	education and supportive group discussion, assistance to find employment, on-site coaching support, follow up support for new problems or job changes, video taped role playing	nr	nr	nr	nr	nr	n/a	n/a	socialisation scale	improved (stats nr, ns)	employment status hourly income
45	Hillier 2011	Atkinson-Jones 2018, Pallathra 2019, Lorenc 2018	NRCT-No control	Social and community	Capacity and participation	nr	nr	nr	nr	49	49	0	nr	0	ASD	ASD without ID	85.7143	m=22	USA	social skills/ communication training	Aspirations (Hillier et al., 2007)	Aspirations (Hillier et al., 2007)	As per 2007 study	no CG	Vocational training/work setting	not described clearly	Individual and group	face-to-face	not clear	the interventionists were not described	Both integrated and segregated	yes	yes	no	no	colleagues	as per 2007 study	as per 2007 study	as per 2007 study	nr	nr	nr	nr	nr	n/a	n/a	index of peer relations	positive effects (stats nr, but ns; Lorenc)	BDI and STAI
46	Smith 2014	Pallarthra 2019, Lorenc 2018	RCT/quasi-RCT	Social and community	Capacity	nr	nr	nr	nr	26	16	10	nr	nr	ASD	ASD without ID	76.9	m=24	USA	social skills/ communication training	VR job interview training	VR job interview training	Job interview training with the intention of improving performance at job interviews	TAU	Vocational training/work setting	not described	Individual	computer based	not clear	not described	Segregated (only for ppl with disability)	no	no	no	no	no	5 sessions over 2 weeks	10 hours total	see description	nr	computer/VR	nr	nr	nr	self-confidence	SMD (Hedges) = 0.46 (-0.34, 1.26), ns	n/a	n/a	mock interview performance
46	Humm 2014	Fernandez-Sotos 2020	RCT/quasi-RCT	Social	Capacity	nr	nr	nr	nr	96	64	32	nr	nr	ASD & PD	26 w ASD, 37 w schizophrenia, 33 w PTSD	nr	nr	USA	social skills/ communication training	Molly Porter Job Interview Training	Molly Porter Job Interview Training	designed to teach, reinforce, and refresh job-interview skills to adults with mental illness who are actively seeking employment. The system incorporates user-driven educational materials, an interactive role play simulation and formative comments to create a training experience consistent with high fidelity simulations, successful job interviews and adult learning theory. The educational compone…	Waitlist/TAU	Vocational training/work setting	not described	Individual	face-to-face	not clear	not described	Segregated (only for ppl with disability)	no	no	no	no	no	5 sessions	2 hr per session	see description	nr	computer/VR in some programs - not described	nr	nr	nr	social cognition (BLERT)	improvement in roleplay interviews and self-evaluation (stats nr)	n/a	n/a	neurocognitive functioning (RBANS)
46	Morgan 2014	Pallarthra 2019, Lorenc 2018	RCT/quasi-RCT	Social and community	Capacity	nr	nr	nr	nr	24 (Lorenc 2018: n=28)	12	12	nr	nr	ASD	ASD without ID	94	m=25	USA	social skills/ communication training	Social skills Curriculum with a focus on interview skills	Social skills Curriculum with a focus on interview skills	training program targeting social-vocational skills, emphasized training on job interview-related social skills, such as answering interview questions, conveying oneself as dependable, closing the interview, and following-up with interviewers	no intervention	Vocational training/work setting	not described	Group (>2 people)	face-to-face	not clear	not described	Segregated (only for ppl with disability)	yes	no	no	no	no	12 weeks	1.5 hrs per week	see description	nr	nr	nr	nr	nr	1. Social pragmatic Scale 2. vineland adaptive behavior scale (parent report) 3. independently coded mock interviews as primary outcomes measures	1. SMD (Hedges) = 0.44 (-0.37, 1.25), ns [but sig asterix next to b/n gp diffs?!] 2. SMD (Hedges) = 0.19 (-0.62, 0.99), ns 3. significant improvement in skills in the treatment group relative to the control group across all three studies	n/a	n/a	PHQ (depression)
[truncated: 122 more rows]
[truncated: 8 more columns]

## Sheet: CCA - overall
				Papers evaluating program incl in SR	Anderson 2015	Atkinson-Jones 2018	Bigby 2012	Bigby 2018	Bondar 2020	Bourne 2018	Budock 2017	Clatworthy 2013	Coren 2011	Exell 2020	Fernandez-Sotos 2020	Finkel 2020	Firth 2015	Firth 2016	Fortuna 2020	Fuhr 2014	Genter 2015	Geretsegger 2017	Gonzalvez 2018	Grant 2017	Hallett 2019	Howarth 2016	Hutchinson 2015	Hutzler 2010	Kaltenthaler 2014	Kamioka 2014	Lindsay 2019	Lorenc 2018	Louw 2019	Ma 2020	Masi 2011	Maujean 2015	McCann 2019	Morin 2017	Naslund 2015	Nguyen 2020	Pallatrha 2019	Palmen 2012	Pescheny 2020	Petroutsou 2007	Picton 2018	Puolakka 2019	Quirk 2020	Ratti 2016	Roche 2019
			1	Chu 2009	0	0	0	0	0	0	0	0	0	0	0	0	0	0	0	0	0	0	0	0	0	0	0	0	0	1	0	0	0	0	0	1	0	0	0	0	0	0	0	0	0	0	0	0	0
[truncated: 523 more rows]
[truncated: 24 more columns]

## Sheet: CCA - by int category
				Papers evaluating program incl in SR	Anderson 2015	Atkinson-Jones 2018	Bigby 2012	Bigby 2018	Bondar 2020	Bourne 2018	Budock 2017	Clatworthy 2013	Coren 2011	Exell 2020	Fernandez-Sotos 2020	Finkel 2020	Firth 2015	Firth 2016	Fortuna 2020	Fuhr 2014	Genter 2015	Geretsegger 2017	Gonzalvez 2018	Grant 2017	Hallett 2019	Howarth 2016	Hutchinson 2015	Hutzler 2010	Kaltenthaler 2014	Kamioka 2014	Lindsay 2019	Lorenc 2018	Louw 2019	Ma 2020	Masi 2011	Maujean 2015	McCann 2019	Morin 2017	Naslund 2015	Nguyen 2020	Pallatrha 2019	Palmen 2012	Pescheny 2020	Petroutsou 2007	Picton 2018	Puolakka 2019	Quirk 2020	Ratti 2016	Roche 2019
[truncated: 560 more rows]
[truncated: 25 more columns]

[truncated: 14 more sheets: Abbreviations for report, country and sample stats, PSD summary stats, ID summary stats, ASD summary stats, ES calculator, Meta study list, Walker 2013, Nguyen 2020, Soundy 2014, Quirk 2020, Firth 2016, Williams 2018, Picton 2020]
